# Supplementary material
Source: MDPI journal article supplement (https://www.mdpi.com/2073-4395/13/3/618)
Supplement: s1 [file s1]

Archive with 8 entries (8 files):
- Figure S1.pdf
- Table S1.pdf
- Table S2.pdf
- Table S3.xlsx
- Table S4.xlsx
- Table S5.xlsx
- Table S6.pdf
- Table S7.pdf
