# Supplementary material
Source: MDPI journal article supplement (https://www.mdpi.com/2073-4395/13/3/618)
Supplement: s1 [file s1 › Table S1.pdf]

**Table S1.** Overview of raw and clean reads in grafting plants exposed to salt stress for 0, 1, and 3 d.

| Sample  | Total raw reads | Total clean reads | Clean reads in raw reads (%) | Total clean bases (Gb) | Clean reads Q30 (%) | GC content (%) |
|---------|-----------------|-------------------|------------------------------|------------------------|---------------------|----------------|
| Ss 0 d1 | 31,897,456      | 30,067,923        | 94.26                        | 8.36                   | 94.47               | 44.99          |
| Ss 0 d2 | 50,586,982      | 47,143,970        | 93.19                        | 13.11                  | 94.17               | 44.38          |
| Ss 0 d3 | 46,399,379      | 43,619,423        | 94.01                        | 12.13                  | 94.45               | 44.42          |
| Ss 1 d1 | 43,249,620      | 40,408,281        | 93.43                        | 11.24                  | 94.32               | 44.32          |
| Ss 1 d2 | 57,285,271      | 53,963,695        | 94.20                        | 15.02                  | 94.78               | 44.32          |
| Ss 1 d3 | 45,906,053      | 42,746,225        | 93.12                        | 11.91                  | 93.85               | 45.08          |
| Ss 3 d1 | 32,300,564      | 30,117,719        | 93.24                        | 8.39                   | 93.99               | 43.62          |
| Ss 3 d2 | 48,999,498      | 45,993,293        | 93.86                        | 12.81                  | 94.44               | 44.65          |
| Ss 3 d3 | 45,982,339      | 43,838,661        | 95.34                        | 12.20                  | 94.98               | 44.05          |
| Rs 0 d1 | 38,526,404      | 35,830,034        | 93.00                        | 9.96                   | 93.75               | 44.73          |
| Rs 0 d2 | 48,573,374      | 45,407,267        | 93.48                        | 12.63                  | 94.20               | 44.63          |
| Rs 0 d3 | 45,566,988      | 42,365,207        | 92.97                        | 11.79                  | 93.81               | 45.08          |
| Rs 1 d1 | 43,800,459      | 40,926,587        | 93.44                        | 11.39                  | 94.39               | 43.74          |
| Rs 1 d2 | 47,248,066      | 44,182,232        | 93.51                        | 12.31                  | 94.10               | 44.27          |
| Rs 1 d3 | 52,405,080      | 48,842,716        | 93.20                        | 13.60                  | 94.28               | 44.07          |
| Rs 3 d1 | 48,440,223      | 45,463,301        | 93.85                        | 12.66                  | 94.50               | 43.03          |
| Rs 3 d2 | 39,705,834      | 37,178,890        | 93.64                        | 10.35                  | 94.31               | 44.36          |
| Rs 3 d3 | 27,060,457      | 25,616,244        | 94.66                        | 7.12                   | 94.99               | 43.73          |
