# Supplementary material
Source: MDPI journal article supplement (https://www.mdpi.com/2073-4395/13/3/618)
Supplement: s1 [file s1 › Table S2.pdf]

**Table S2.** Mapping results of clean reads against the watermelon genomic sequence.

| Sample  | Total clean reads | Total mapped reads     | Uniquely mapped reads  | Multiple mapped reads | Reads Map to '+'       | Reads Map to '-'       |
|---------|-------------------|------------------------|------------------------|-----------------------|------------------------|------------------------|
| Ss 0 d1 | 60,135,846        | 56,834,433<br>(94.51%) | 53,983,688<br>(89.77%) | 2,850,745<br>(4.74%)  | 27,693,505<br>(46.05%) | 26,212,572<br>(43.59%) |
| Ss 0 d2 | 94,287,940        | 88,472,482<br>(93.83%) | 85,532,644<br>(90.71%) | 2,939,838<br>(3.12%)  | 43,638,056<br>(46.28%) | 42,427,828<br>(45.00%) |
| Ss 0 d3 | 87,238,846        | 82,838,489<br>(94.96%) | 77,914,849<br>(89.31%) | 4,923,640<br>(5.64%)  | 40,067,330<br>(45.93%) | 36,258,363<br>(41.56%) |
| Ss1d1   | 80,816,562        | 77,851,494<br>(96.33%) | 74,891,447<br>(92.67%) | 2,960,047<br>(3.66%)  | 38,350,096<br>(47.45%) | 36,996,614<br>(45.78%) |
| Ss 1 d2 | 107,927,390       | 98,335,454<br>(91.11%) | 94,332,267<br>(87.40%) | 4,003,187<br>(3.71%)  | 48,536,282<br>(44.97%) | 47,251,234<br>(43.78%) |
| Ss 1 d3 | 85,492,450        | 83,953,487<br>(98.20%) | 81,868,652<br>(95.76%) | 2,084,835<br>(2.44%)  | 41,653,092<br>(48.72%) | 41,226,467<br>(48.22%) |
| Ss 3 d1 | 60,235,438        | 51,844,465<br>(86.07%) | 49,950,229<br>(82.92%) | 1,894,236<br>(3.14%)  | 25,530,529<br>(42.38%) | 24,811,407<br>(41.19%) |
| Ss3d2   | 91,986,586        | 85,051,325<br>(92.46%) | 81,976,036<br>(89.12%) | 3,075,289<br>(3.34%)  | 41,927,672<br>(45.58%) | 41,191,418<br>(44.78%) |
| Ss 3 d3 | 87,677,322        | 72,449,523<br>(82.63%) | 69,581,593<br>(79.36%) | 2,867,930<br>(3.27%)  | 35,558,351<br>(40.56%) | 34,696,539<br>(39.57%) |
| Rs 0 d1 | 71,660,068        | 68,794,178<br>(96.00%) | 66,398,936<br>(92.66%) | 2,395,242<br>(3.34%)  | 33,887,631<br>(47.29%) | 32,969,407<br>(46.01%) |
| Rs 0 d2 | 90,814,534        | 88,790,395<br>(97.77%) | 85,445,021<br>(94.09%) | 3,345,374<br>(3.68%)  | 43,586,456<br>(48.00%) | 42,259,796<br>(46.53%) |
| Rs 0 d3 | 84,730,414        | 82,957,690<br>(97.91%) | 79,157,302<br>(93.42%) | 3,800,388<br>(4.49%)  | 40,538,577<br>(47.84%) | 38,503,415<br>(45.44%) |
| Rs 1 d1 | 81,853,174        | 73,116,803<br>(89.33%) | 69,974,173<br>(85.49%) | 3,142,630<br>(3.84%)  | 36,115,914<br>(44.12%) | 35,219,484<br>(43.03%) |
| Rs 1 d2 | 88,364,464        | 84,420,471<br>(95.54%) | 80,949,197<br>(91.61%) | 3,471,274<br>(3.93%)  | 41,681,725<br>(47.17%) | 40,585,015<br>(45.93%) |
| Rs 1 d3 | 97,685,432        | 92,826,847<br>(95.03%) | 89,055,788<br>(91.17%) | 3,771,059<br>(3.86%)  | 45,961,611<br>(47.05%) | 45,244,313<br>(46.32%) |
| Rs 3 d1 | 90,926,602        | 67,161,568<br>(73.86%) | 64,428,463<br>(70.86%) | 2,733,105<br>(3.01%)  | 33,155,629<br>(36.46%) | 32,439,722<br>(35.68%) |
| Rs 3 d2 | 74,357,780        | 67,071,468<br>(90.20%) | 64,921,202<br>(87.31%) | 2,150,266<br>(2.89%)  | 33,177,458<br>(44.62%) | 32,635,814<br>(43.89%) |
| Rs 3 d3 | 51,232,488        | 46,539,685<br>(90.84%) | 44,809,971<br>(87.46%) | 1,729,714<br>(3.38%)  | 22,974,279<br>(44.84%) | 22,397,577<br>(43.72%) |
