# Supplementary material
Source: MDPI journal article supplement (https://www.mdpi.com/2073-4395/13/3/618)
Supplement: s1 [file s1 › Table S3.xlsx]

## Sheet: Ss 0 d vs. Ss 1 d
Table S3. The differentially expressed genes in under salt stress.
#ID	Ss0d1_Count	Ss0d2_Count	Ss0d3_Count	Ss1d1_Count	Ss1d2_Count	Ss1d3_Count	Ss0d1_FPKM	Ss0d2_FPKM	Ss0d3_FPKM	Ss1d1_FPKM	Ss1d2_FPKM	Ss1d3_FPKM	Pvalue	log2FC	regulated	COG_class	COG_class_annotation	GO_annotation	KEGG_annotation	KEGG_pathway_annotation	KOG_class	KOG_class_annotation	Pfam_annotation	Swiss-Prot_annotation	eggNOG_class	eggNOG_class_annotation	NR_annotation
Cla97C07G130320	647	2035	3334	467	1173	688	32.379	66.4202	122.719	17.5598	34.1383	23.0341	0.00177664	-1.70049	down	--	--	--	--	--	--	--	Cleavage site for pathogenic type III effector avirulence factor Avr	--	S	Function unknown	RPM1-interacting protein 4-like [Syzygium oleosum]
Cla97C09G177710	393	860	6889	264	255	183	21.402	30.5563	276.071	10.7837	8.06849	6.64419	2.23e-05	-3.83625	down	--	--	--	--	--	--	--	Aspartic acid proteinase inhibitor;; Phloem filament protein PP1 cystatin-like domain	--	--	--	hypothetical protein Csa_017234 [Cucumis sativus]
Cla97C05G088090	663	767	863	313	487	238	38.9467	29.3665	37.2778	13.7902	16.6499	9.3505	1.14e-06	-1.52305	down	[K]	Transcription	Biological Process: transcription from RNA polymerase II promoter (GO:0006366);; Cellular Component: nuclear lumen (GO:0031981);; Molecular Function: 5'-3' RNA polymerase activity (GO:0034062);; Molecular Function: transition metal ion binding (GO:0046914);; Molecular Function: organic cyclic compound binding (GO:0097159);;	K03017|1.00258e-80|csv:101211228|DNA-directed RNA polymerases II, IV and V subunit 9A	RNA polymerase (ko03020)	[K]	Transcription	Transcription factor S-II (TFIIS);; RNA polymerases M/15 Kd subunit	sp|Q6NLH0|RPB9A_ARATH DNA-directed RNA polymerases II, IV and V subunit 9A OS=Arabidopsis thaliana OX=3702 GN=NRPB9A PE=1 SV=1	K	Transcription	PREDICTED: DNA-directed RNA polymerases II, IV and V subunit 9A [Cucumis melo]
Cla97C05G085120	1203	5875	6064	515	1657	889	15.4627	49.2292	57.2846	4.96695	12.3797	7.64009	1.91e-05	-2.41172	down	[GEPR]	Carbohydrate transport and metabolism;; Amino acid transport and metabolism;; Inorganic ion transport and metabolism;; General function prediction only	Molecular Function: secondary active transmembrane transporter activity (GO:0015291);; Biological Process: inorganic anion transport (GO:0015698);; Cellular Component: intrinsic component of membrane (GO:0031224);;	K08176|0|csv:101209582|inorganic phosphate transporter 1-4	--	[P]	Inorganic ion transport and metabolism	Sugar (and other) transporter;; Major Facilitator Superfamily	sp|A7KTC5|PHT11_PETHY Low affinity inorganic phosphate transporter 1 OS=Petunia hybrida OX=4102 GN=PT1 PE=2 SV=1	P	Inorganic ion transport and metabolism	PREDICTED: inorganic phosphate transporter 1-4 [Cucumis sativus]
Cla97C03G054620	4804	6489	3914	1682	3146	3034	142.496	125.429	85.2878	37.4898	54.2541	60.1607	1.73e-05	-1.31347	down	[F]	Nucleotide transport and metabolism	Biological Process: nucleoside diphosphate metabolic process (GO:0009132);; Biological Process: purine ribonucleotide biosynthetic process (GO:0009152);; Biological Process: pyrimidine ribonucleoside triphosphate biosynthetic process (GO:0009209);; Molecular Function: phosphotransferase activity, phosphate group as acceptor (GO:0016776);; Molecular Function: purine ribonucleoside binding (GO:0032…	K00940|9.78397e-142|csv:101212831|uncharacterized protein LOC101212831	Purine metabolism (ko00230);; Pyrimidine metabolism (ko00240);; Biosynthesis of cofactors (ko01240);; MAPK signaling pathway - plant (ko04016)	[F]	Nucleotide transport and metabolism	Nucleoside diphosphate kinase	sp|P47923|NDK2_PEA Nucleoside diphosphate kinase 2, chloroplastic OS=Pisum sativum OX=3888 GN=NDPK2 PE=1 SV=1	F	Nucleotide transport and metabolism	PREDICTED: nucleoside diphosphate kinase [Cucumis sativus]
Cla97C11G206560	545	1884	2122	672	532	583	8.46082	19.0859	24.2344	7.8429	4.80376	6.05845	0.000827129	-1.57622	down	[QV]	Secondary metabolites biosynthesis, transport and catabolism;; Defense mechanisms	--	--	--	[Q]	Secondary metabolites biosynthesis, transport and catabolism	Cytochrome P450	sp|A0A068Q5V6|C7150_PRUMU Cytochrome P450 71AU50 OS=Prunus mume OX=102107 GN=CYP71AU50 PE=2 SV=1	Q	Secondary metabolites biosynthesis, transport and catabolism	PREDICTED: cytochrome P450 CYP736A12-like [Cucumis sativus]
Cla97C09G165360	467	1210	925	210	431	361	6.39864	10.8154	9.32111	2.15682	3.43488	3.30869	5.2e-07	-1.67991	down	--	--	Cellular Component: intrinsic component of membrane (GO:0031224);;	--	--	[E]	Amino acid transport and metabolism	Transmembrane amino acid transporter protein	sp|Q9M8L9|AVT6E_ARATH Amino acid transporter AVT6E OS=Arabidopsis thaliana OX=3702 GN=AVT6E PE=2 SV=1	E	Amino acid transport and metabolism	PREDICTED: sodium-coupled neutral amino acid transporter 4 [Cucumis melo]
Cla97C10G201400	142	974	3825	37	101	111	4.28192	19.2419	85.237	0.827724	1.77959	2.23829	6.62e-07	-4.62642	down	--	--	Cellular Component: intrinsic component of membrane (GO:0031224);;	--	--	--	--	Late embryogenesis abundant protein	sp|Q9SJ52|NHL10_ARATH NDR1/HIN1-like protein 10 OS=Arabidopsis thaliana OX=3702 GN=NHL10 PE=2 SV=1	S	Function unknown	PREDICTED: protein YLS9-like [Cucumis sativus]
Cla97C01G001720	986	1100	3236	788	1251	564	34.5283	25.1164	83.3156	20.7462	25.4691	13.2035	0.00950065	-1.40714	down	--	--	--	--	--	--	--	--	--	U	Intracellular trafficking, secretion, and vesicular transport	PREDICTED: uncharacterized protein LOC101205585 isoform X2 [Cucumis sativus]
Cla97C05G095030	712	1658	975	216	559	338	12.2819	18.638	12.3556	2.79041	5.60176	3.89846	2.94e-08	-1.91938	down	--	--	--	--	--	--	--	Protein of unknown function (DUF642)	--	S	Function unknown	hypothetical protein E5676_scaffold108G001320 [Cucumis melo var. makuwa]
Cla97C07G143030	2423	4489	7582	2479	3401	1932	65.028	78.5115	149.507	49.9781	53.0559	34.6603	0.00356908	-1.21634	down	[O]	Posttranslational modification, protein turnover, chaperones	Cellular Component: cytoplasm (GO:0005737);; Molecular Function: disulfide oxidoreductase activity (GO:0015036);; Biological Process: single-organism metabolic process (GO:0044710);; Biological Process: defense response to fungus (GO:0050832);;	--	--	--	--	DSBA-like thioredoxin domain	sp|P39598|YWBO_BACSU Uncharacterized protein YwbO OS=Bacillus subtilis (strain 168) OX=224308 GN=ywbO PE=4 SV=1	Q	Secondary metabolites biosynthesis, transport and catabolism	hypothetical protein Csa_014666 [Cucumis sativus]
Cla97C07G134950	155	94	198	52	91	88	1.25377	0.491591	1.17789	0.313773	0.428238	0.475307	0.00843383	-1.37602	down	[MDT]	Cell wall/membrane/envelope biogenesis;; Cell cycle control, cell division, chromosome partitioning;; Signal transduction mechanisms	Molecular Function: purine ribonucleoside binding (GO:0032550);;	--	--	[O]	Posttranslational modification, protein turnover, chaperones	ATPase family associated with various cellular activities (AAA);; AAA+ lid domain;; Holliday junction DNA helicase RuvB P-loop domain;; AAA domain (dynein-related subfamily)	sp|Q9P7J5|YJNA_SCHPO Uncharacterized AAA domain-containing protein C24B10.10c OS=Schizosaccharomyces pombe (strain 972 / ATCC 24843) OX=284812 GN=SPCC24B10.10c PE=3 SV=1	O	Posttranslational modification, protein turnover, chaperones	putative cell division cycle ATPase [Cucumis melo var. makuwa]
Cla97C05G099440	690	56	555	98	75	18	29.6823	1.55909	17.5527	3.14099	1.8675	0.497901	0.000967776	-3.25864	down	[O]	Posttranslational modification, protein turnover, chaperones	--	K13993|3.63125e-81|csv:101212955|17.9 kDa class II heat shock protein	Protein processing in endoplasmic reticulum (ko04141)	[O]	Posttranslational modification, protein turnover, chaperones	Hsp20/alpha crystallin family;; HSP20-like domain found in ArsA	sp|P05477|HSP21_SOYBN 17.9 kDa class II heat shock protein OS=Glycine max OX=3847 GN=HSP17.9-D PE=3 SV=1	O	Posttranslational modification, protein turnover, chaperones	HSP17.4 [Citrullus lanatus]
Cla97C06G123040	1699	3494	4590	1493	2338	1551	37.7829	50.6515	75.0175	24.9526	30.2327	23.0684	0.0005609	-1.18287	down	--	--	Cellular Component: intrinsic component of membrane (GO:0031224);;	--	--	--	--	--	--	367		PREDICTED: uncharacterized protein LOC101222970 isoform X1 [Cucumis sativus]
Cla97C10G204600	1031	7195	9188	88	686	124	14.5551	66.2028	95.3214	0.933525	5.62578	1.16125	2.19e-08	-4.6625	down	--	--	Cellular Component: membrane (GO:0016020);;	--	--	[G]	Carbohydrate transport and metabolism	Protein of unknown function, DUF604;; Fringe-like	--	G	Carbohydrate transport and metabolism	uncharacterized protein LOC111442138 [Cucurbita moschata]
Cla97C02G047540	3089	10713	9573	3152	3498	2654	79.1191	178.849	180.186	60.6607	52.0861	45.4442	5.29e-05	-1.57687	down	--	--	Biological Process: cation transport (GO:0006812);; Molecular Function: cation binding (GO:0043169);;	--	--	[P]	Inorganic ion transport and metabolism	Heavy-metal-associated domain	sp|Q9FJH5|HIP3_ARATH Heavy metal-associated isoprenylated plant protein 3 OS=Arabidopsis thaliana OX=3702 GN=HIPP03 PE=1 SV=1	P	Inorganic ion transport and metabolism	PREDICTED: heavy metal-associated isoprenylated plant protein 3-like [Cucumis melo]
Cla97C11G207800	1559	3160	4347	1471	2529	1485	26.547	35.0736	54.4052	18.8234	25.0422	16.9071	0.00394227	-1.05657	down	[T]	Signal transduction mechanisms	Biological Process: cellular protein modification process (GO:0006464);; Biological Process: phosphate-containing compound metabolic process (GO:0006796);; Molecular Function: kinase activity (GO:0016301);; Molecular Function: purine ribonucleoside binding (GO:0032550);;	--	--	[T]	Signal transduction mechanisms	Protein tyrosine and serine/threonine kinase;; Protein kinase domain	sp|Q9ZUF4|RIPK_ARATH Serine/threonine-protein kinase RIPK OS=Arabidopsis thaliana OX=3702 GN=RIPK PE=1 SV=1	T	Signal transduction mechanisms	PREDICTED: serine/threonine-protein kinase At5g01020 [Cucumis melo]
Cla97C10G200780	205	261	241	86	138	55	2.17152	1.79686	1.87715	0.679103	0.850255	0.385764	9.84e-06	-1.71658	down	--	--	--	--	--	--	--	--	sp|Q9M2G8|IQM6_ARATH IQ domain-containing protein IQM6 OS=Arabidopsis thaliana OX=3702 GN=IQM6 PE=2 SV=1	S	Function unknown	PREDICTED: IQ domain-containing protein IQM6 [Cucumis melo]
Cla97C03G055820	1271	1338	17926	472	2119	546	15.4521	10.6028	160.212	4.31241	14.9838	4.43791	0.00149741	-3.15756	down	[EH]	Amino acid transport and metabolism;; Coenzyme transport and metabolism	Biological Process: sulfur compound metabolic process (GO:0006790);; Molecular Function: oxidoreductase activity, acting on a sulfur group of donors (GO:0016667);; Biological Process: cellular homeostasis (GO:0019725);; Biological Process: single-organism metabolic process (GO:0044710);;	K05907|0|cmos:111431516|5'-adenylylsulfate reductase 3, chloroplastic-like	Sulfur metabolism (ko00920)	[E]	Amino acid transport and metabolism	Phosphoadenosine phosphosulfate reductase family;; Thioredoxin	sp|P92980|APR3_ARATH 5&apos;-adenylylsulfate reductase 3, chloroplastic OS=Arabidopsis thaliana OX=3702 GN=APR3 PE=2 SV=2	EO	Amino acid transport and metabolism;; Posttranslational modification, protein turnover, chaperones	5&apos;-adenylylsulfate reductase 3, chloroplastic-like [Cucurbita moschata]
Cla97C04G077860	702	7975	15664	294	816	107	10.7529	79.7027	176.508	3.38047	7.27321	1.08829	4.72e-07	-4.66427	down	--	--	--	--	--	--	--	Calmodulin binding protein-like	sp|Q9C9T2|SARD1_ARATH Protein SAR DEFICIENT 1 OS=Arabidopsis thaliana OX=3702 GN=SARD1 PE=1 SV=1	S	Function unknown	PREDICTED: uncharacterized protein LOC101215184 [Cucumis sativus]
Cla97C03G053080	428	1970	2987	204	364	279	7.7992	23.4028	40.0023	2.79048	3.85008	3.39189	4.8e-07	-2.95095	down	[T]	Signal transduction mechanisms	Molecular Function: signal transducer, downstream of receptor, with serine/threonine kinase activity (GO:0004702);; Biological Process: cellular protein modification process (GO:0006464);; Biological Process: phosphate-containing compound metabolic process (GO:0006796);; Molecular Function: purine ribonucleoside binding (GO:0032550);; Biological Process: intracellular signal transduction (GO:0035…	K04371|0|csv:101218403|mitogen-activated protein kinase homolog NTF6	--	[T]	Signal transduction mechanisms	Protein kinase domain;; Protein tyrosine and serine/threonine kinase	sp|Q40531|NTF6_TOBAC Mitogen-activated protein kinase homolog NTF6 OS=Nicotiana tabacum OX=4097 GN=NTF6 PE=2 SV=1	T	Signal transduction mechanisms	PREDICTED: mitogen-activated protein kinase homolog NTF6 [Cucumis sativus]
Cla97C02G031910	540	1006	1818	138	89	522	44.4723	54.0389	110.15	8.55077	4.22198	28.7776	0.00120907	-2.42489	down	--	--	Molecular Function: nucleic acid binding (GO:0003676);; Cellular Component: intracellular membrane-bounded organelle (GO:0043231);;	--	--	[O]	Posttranslational modification, protein turnover, chaperones	Myb-like DNA-binding domain	sp|Q58FS3|RAD_ANTMA Transcription factor RADIALIS OS=Antirrhinum majus OX=4151 GN=RAD PE=1 SV=1	K	Transcription	PREDICTED: protein RADIALIS-like 1 [Cucumis melo]
Cla97C08G152080	2669	7060	7812	2442	3678	2946	29.5396	50.9247	63.5301	20.3089	23.6661	21.7977	0.000363532	-1.24427	down	--	--	Molecular Function: oligosaccharyl transferase activity (GO:0004576);; Biological Process: cellular protein modification process (GO:0006464);; Cellular Component: intrinsic component of membrane (GO:0031224);; Cellular Component: intracellular membrane-bounded organelle (GO:0043231);;	K12666|0|cmo:103502612|dolichyl-diphosphooligosaccharide--protein glycosyltransferase subunit 1A	N-Glycan biosynthesis (ko00510);; Various types of N-glycan biosynthesis (ko00513);; Protein processing in endoplasmic reticulum (ko04141)	[O]	Posttranslational modification, protein turnover, chaperones	Ribophorin I	sp|Q9SFX3|OST1A_ARATH Dolichyl-diphosphooligosaccharide--protein glycosyltransferase subunit 1A OS=Arabidopsis thaliana OX=3702 GN=OST1A PE=2 SV=1	O	Posttranslational modification, protein turnover, chaperones	PREDICTED: dolichyl-diphosphooligosaccharide--protein glycosyltransferase subunit 1A [Cucumis melo]
Cla97C11G219790	58	224	537	15	67	28	0.793664	1.99014	5.39674	0.145579	0.526463	0.252421	6.44e-05	-3.26761	down	[MDT]	Cell wall/membrane/envelope biogenesis;; Cell cycle control, cell division, chromosome partitioning;; Signal transduction mechanisms	Molecular Function: small molecule binding (GO:0036094);; Molecular Function: organic cyclic compound binding (GO:0097159);; Molecular Function: heterocyclic compound binding (GO:1901363);;	--	--	[O]	Posttranslational modification, protein turnover, chaperones	Domain associated at C-terminal with AAA;; ATPase family associated with various cellular activities (AAA)	sp|Q8VZG2|HSR4_ARATH Protein HYPER-SENSITIVITY-RELATED 4 OS=Arabidopsis thaliana OX=3702 GN=HSR4 PE=2 SV=1	O	Posttranslational modification, protein turnover, chaperones	AAA-ATPase At3g50940-like [Momordica charantia]
Cla97C06G116460	1849	5639	4958	1067	2176	1423	79.1435	157.308	155.923	34.3005	54.1427	40.7257	2.69e-06	-1.716	down	--	--	Cellular Component: intrinsic component of membrane (GO:0031224);;	--	--	--	--	HR-like lesion-inducing	--	S	Function unknown	PREDICTED: uncharacterized protein LOC101220681 [Cucumis sativus]
Cla97C08G155300	924	1932	3267	918	1267	789	15.9308	21.7144	41.4127	11.8925	12.7034	9.09173	0.00194219	-1.35684	down	[I]	Lipid transport and metabolism	Molecular Function: catalytic activity (GO:0003824);; Cellular Component: intrinsic component of membrane (GO:0031224);;	K01054|0|cmo:103488173|monoglyceride lipase	Glycerolipid metabolism (ko00561)	[I]	Lipid transport and metabolism	Serine aminopeptidase, S33;; Alpha/beta hydrolase family;; alpha/beta hydrolase fold	sp|Q9C942|CSE_ARATH Caffeoylshikimate esterase OS=Arabidopsis thaliana OX=3702 GN=CSE PE=1 SV=1	I	Lipid transport and metabolism	PREDICTED: monoglyceride lipase [Cucumis melo]
Cla97C06G115310	84	444	420	23	41	53	1.72334	5.9771	6.37554	0.346993	0.488437	0.719926	1.87e-07	-3.26079	down	[J]	Translation, ribosomal structure and biogenesis	Biological Process: tRNA metabolic process (GO:0006399);; Molecular Function: transferase activity, transferring alkyl or aryl (other than methyl) groups (GO:0016765);; Cellular Component: intracellular membrane-bounded organelle (GO:0043231);;	K10760|0|cpep:111806983|adenylate isopentenyltransferase 5, chloroplastic-like	Zeatin biosynthesis (ko00908)	[J]	Translation, ribosomal structure and biogenesis	IPP transferase;; Isopentenyl transferase	sp|Q94ID2|IPT5_ARATH Adenylate isopentenyltransferase 5, chloroplastic OS=Arabidopsis thaliana OX=3702 GN=IPT5 PE=1 SV=2	J	Translation, ribosomal structure and biogenesis	adenylate isopentenyltransferase 5, chloroplastic-like [Cucurbita pepo subsp. pepo]
Cla97C03G065070	29853	53294	51989	12060	14511	16767	359.905	418.723	460.525	109.247	101.704	135.146	1.33e-15	-1.94252	down	[O]	Posttranslational modification, protein turnover, chaperones	--	K04078|2.18868e-163|cmo:103492392|20 kDa chaperonin, chloroplastic	--	[O]	Posttranslational modification, protein turnover, chaperones	Chaperonin 10 Kd subunit	sp|O65282|CH20_ARATH 20 kDa chaperonin, chloroplastic OS=Arabidopsis thaliana OX=3702 GN=CPN20 PE=1 SV=2	O	Posttranslational modification, protein turnover, chaperones	PREDICTED: 20 kDa chaperonin, chloroplastic [Cucumis melo]
Cla97C09G184400	96	171	212	56	44	35	1.81221	2.11456	2.95144	0.792487	0.479649	0.435857	5.29e-06	-2.11212	down	--	--	--	K14709|4.10249e-156|cmo:103489625|zinc transporter 1	--	[P]	Inorganic ion transport and metabolism	ZIP Zinc transporter	sp|O81123|ZIP1_ARATH Zinc transporter 1 OS=Arabidopsis thaliana OX=3702 GN=ZIP1 PE=2 SV=1	P	Inorganic ion transport and metabolism	PREDICTED: zinc transporter 1 [Cucumis melo]
Cla97C06G123440	1139	1485	2193	829	972	762	31.2936	26.5929	44.298	17.1203	15.5314	14.002	5.12e-05	-1.24718	down	--	--	--	--	--	--	--	--	--	397		PREDICTED: uncharacterized protein LOC103494211 [Cucumis melo]
Cla97C05G087930	893	1739	1485	478	1306	827	9.26883	11.7725	11.3301	3.72465	7.88234	5.74292	0.00241618	-1.01266	down	--	--	Biological Process: extracellular matrix organization (GO:0030198);; Cellular Component: intrinsic component of membrane (GO:0031224);; Biological Process: growth (GO:0040007);;	--	--	--	--	COBRA-like protein	sp|Q8GZ17|COBL7_ARATH COBRA-like protein 7 OS=Arabidopsis thaliana OX=3702 GN=COBL7 PE=2 SV=2	S	Function unknown	PREDICTED: COBRA-like protein 7 [Cucumis sativus]
Cla97C04G071530	6384	20692	28611	9188	12237	5311	287.838	608.032	947.871	311.264	320.757	160.085	0.00842073	-1.34573	down	[T]	Signal transduction mechanisms	Molecular Function: metal ion binding (GO:0046872);;	K02183|8.3105e-103|csv:101205905|calmodulin	MAPK signaling pathway - plant (ko04016);; Phosphatidylinositol signaling system (ko04070);; Plant-pathogen interaction (ko04626)	[T]	Signal transduction mechanisms	EF hand;; EF-hand domain pair;; EF-hand domain pair;; EF-hand domain;; EF hand;; EF-hand domain;; Cytoskeletal-regulatory complex EF hand;; Secreted protein acidic and rich in cysteine Ca binding region;; EF-hand domain;; Ca2+ insensitive EF hand	sp|P93087|CALM_CAPAN Calmodulin OS=Capsicum annuum OX=4072 GN=CCM1 PE=2 SV=3	T	Signal transduction mechanisms	PREDICTED: calmodulin [Cucumis melo]
Cla97C05G080230	2254	5438	6477	2223	3087	1774	129.182	203.119	272.77	95.7144	102.85	67.9748	0.000413397	-1.30166	down	--	--	Biological Process: protein transport (GO:0015031);; Cellular Component: intrinsic component of membrane (GO:0031224);; Cellular Component: translocon complex (GO:0071256);;	K09481|1.19656e-27|mcha:111015719|protein transport protein Sec61 subunit beta-like	Protein export (ko03060);; Protein processing in endoplasmic reticulum (ko04141);; Phagosome (ko04145)	[O]	Posttranslational modification, protein turnover, chaperones	Sec61beta family	sp|P38389|SC61B_ARATH Protein transport protein Sec61 subunit beta OS=Arabidopsis thaliana OX=3702 GN=At2g45070 PE=1 SV=1	U	Intracellular trafficking, secretion, and vesicular transport	protein transport protein Sec61 subunit beta-like [Momordica charantia]
Cla97C01G019260	183	1072	3709	105	189	168	2.35553	9.03146	35.2407	1.01993	1.41819	1.45021	9.26e-06	-3.7279	down	[MDT]	Cell wall/membrane/envelope biogenesis;; Cell cycle control, cell division, chromosome partitioning;; Signal transduction mechanisms	Molecular Function: small molecule binding (GO:0036094);; Molecular Function: organic cyclic compound binding (GO:0097159);; Molecular Function: heterocyclic compound binding (GO:1901363);;	--	--	[O]	Posttranslational modification, protein turnover, chaperones	ATPase family associated with various cellular activities (AAA);; Domain associated at C-terminal with AAA;; RNA helicase	sp|Q8GW96|AATP3_ARATH AAA-ATPase At2g18193 OS=Arabidopsis thaliana OX=3702 GN=At2g18193 PE=2 SV=1	O	Posttranslational modification, protein turnover, chaperones	PREDICTED: AAA-ATPase At2g18193-like [Cucumis melo]
Cla97C05G093390	1575	10172	10966	314	816	602	64.1332	270.083	328.275	9.59612	19.3134	16.3719	5.02e-11	-3.98943	down	--	--	--	--	--	[R]	General function prediction only	C2 domain	sp|Q9LVH4|CAR4_ARATH Protein C2-DOMAIN ABA-RELATED 4 OS=Arabidopsis thaliana OX=3702 GN=CAR4 PE=1 SV=1	S	Function unknown	protein C2-DOMAIN ABA-RELATED 4-like [Momordica charantia]
Cla97C03G063400	400	2364	2404	139	609	178	9.89813	38.1673	43.7462	2.57097	8.76914	2.94543	3.48e-05	-2.81866	down	--	--	--	--	--	--	--	Viral movement protein (MP)	sp|P05396|MVP_CERV Movement protein OS=Carnation etched ring virus OX=10640 GN=ORF I PE=3 SV=1	S	Function unknown	hypothetical protein Csa_006902 [Cucumis sativus]
Cla97C11G213580	139	214	270	68	170	82	6.16144	6.19191	8.79489	2.25853	4.37611	2.43375	0.00146798	-1.34202	down	--	--	Cellular Component: intrinsic component of membrane (GO:0031224);;	--	--	--	--	Domain of unknown function (DUF588)	sp|Q945M8|CSPLI_ARATH CASP-like protein 5B2 OS=Arabidopsis thaliana OX=3702 GN=At3g53850 PE=2 SV=1	S	Function unknown	PREDICTED: CASP-like protein 5B1 [Cucumis melo]
Cla97C11G223360	1722	8278	9377	763	4054	1036	11.304	35.4218	45.2415	3.76236	15.4749	4.54712	0.00218858	-2.09399	down	[K]	Transcription	--	--	--	--	--	Protein tyrosine and serine/threonine kinase;; Protein kinase domain;; Malectin domain;; Leucine rich repeat;; Leucine Rich repeats (2 copies)	sp|C0LGG9|Y5344_ARATH Probable LRR receptor-like serine/threonine-protein kinase At1g53440 OS=Arabidopsis thaliana OX=3702 GN=At1g53440 PE=2 SV=2	T	Signal transduction mechanisms	probable LRR receptor-like serine/threonine-protein kinase At1g53440 [Cucurbita moschata]
Cla97C09G179130	1929	9119	13948	2226	2384	2142	14.4587	44.56	76.8421	12.5392	10.389	10.7343	0.000230042	-2.13359	down	--	--	Biological Process: signal transduction (GO:0007165);; Molecular Function: purine nucleotide binding (GO:0017076);; Molecular Function: nucleoside-triphosphatase activity (GO:0017111);; Molecular Function: protein complex binding (GO:0032403);; Molecular Function: purine ribonucleoside binding (GO:0032550);;	--	--	[DT]	Cell cycle control, cell division, chromosome partitioning;; Signal transduction mechanisms	G-protein alpha subunit	sp|O80462|XLG1_ARATH Extra-large guanine nucleotide-binding protein 1 OS=Arabidopsis thaliana OX=3702 GN=XLG1 PE=1 SV=2	DT	Cell cycle control, cell division, chromosome partitioning;; Signal transduction mechanisms	PREDICTED: extra-large guanine nucleotide-binding protein 1-like isoform X2 [Cucumis melo]
Cla97C09G167430	1091	2709	2557	1112	1445	1145	19.6069	31.7527	33.7868	15.0255	15.1093	13.7629	0.000283297	-1.06471	down	--	--	Cellular Component: intrinsic component of membrane (GO:0031224);; Molecular Function: tetrapyrrole binding (GO:0046906);;	--	--	--	--	Ethylbenzene dehydrogenase	--	S	Function unknown	PREDICTED: uncharacterized protein LOC101219938 [Cucumis sativus]
Cla97C10G195120	3323	6032	9226	1968	3590	2061	43.7138	51.7206	89.1897	19.4564	27.4614	18.1266	1.68e-05	-1.63176	down	[O]	Posttranslational modification, protein turnover, chaperones	Molecular Function: protein binding (GO:0005515);; Biological Process: cellular process (GO:0009987);; Cellular Component: intrinsic component of membrane (GO:0031224);; Biological Process: phyllome development (GO:0048827);;	--	--	[O]	Posttranslational modification, protein turnover, chaperones	RNA polymerase Rpb3/Rpb11 dimerisation domain;; FKBP-type peptidyl-prolyl cis-trans isomerase;; Tetratricopeptide repeat;; Tetratricopeptide repeat;; TPR repeat;; RNA polymerase Rpb3/Rpb11 dimerisation domain;; Tetratricopeptide repeat	sp|Q9LDC0|FKB42_ARATH Peptidyl-prolyl cis-trans isomerase FKBP42 OS=Arabidopsis thaliana OX=3702 GN=FKBP42 PE=1 SV=1	O	Posttranslational modification, protein turnover, chaperones	PREDICTED: peptidyl-prolyl cis-trans isomerase FKBP42 [Cucumis sativus]
Cla97C07G131160	134	678	4642	14	122	48	4.38006	14.5063	111.963	0.338479	2.32271	1.04474	8.73e-07	-5.31186	down	--	--	--	--	--	--	--	Helix-loop-helix DNA-binding domain	sp|F4JIJ7|BH162_ARATH Transcription factor bHLH162 OS=Arabidopsis thaliana OX=3702 GN=BHLH162 PE=1 SV=1	K	Transcription	transcription factor bHLH55-like [Cucumis melo var. makuwa]
Cla97C01G024460	1563	2011	1982	1041	1175	1138	34.1904	28.6727	31.8692	17.1095	14.9426	16.6473	1.67e-07	-1.06305	down	[R]	General function prediction only	--	--	--	[G]	Carbohydrate transport and metabolism	NAD(P)H-binding;; NmrA-like family;; NAD dependent epimerase/dehydratase family;; 3-beta hydroxysteroid dehydrogenase/isomerase family	sp|Q8H124|Y2446_ARATH Uncharacterized protein At2g34460, chloroplastic OS=Arabidopsis thaliana OX=3702 GN=At2g34460 PE=1 SV=1	G	Carbohydrate transport and metabolism	uncharacterized protein At2g34460, chloroplastic [Cucurbita moschata]
Cla97C06G114460	1007	2724	4397	595	1406	379	28.0218	49.3974	89.904	12.4302	22.7477	7.03634	0.000239303	-2.12791	down	--	--	Cellular Component: intrinsic component of membrane (GO:0031224);; Molecular Function: transition metal ion binding (GO:0046914);;	--	--	[O]	Posttranslational modification, protein turnover, chaperones	Ring finger domain;; RING-like zinc finger;; RING-H2 zinc finger domain;; Zinc finger, C3HC4 type (RING finger);; Zinc finger, C3HC4 type (RING finger)	sp|Q8L9T5|ATL2_ARATH RING-H2 finger protein ATL2 OS=Arabidopsis thaliana OX=3702 GN=ATL2 PE=2 SV=2	O	Posttranslational modification, protein turnover, chaperones	PREDICTED: RING-H2 finger protein ATL2-like [Cucumis melo]
Cla97C09G166110	408	837	752	205	517	400	5.72648	7.66128	7.7612	2.16344	4.22087	3.75486	0.000809865	-1.17127	down	--	--	--	--	--	--	--	GDSL/SGNH-like Acyl-Esterase family found in Pmr5 and Cas1p;; PMR5 N terminal Domain	sp|Q0WPS0|TBL14_ARATH Protein trichome birefringence-like 14 OS=Arabidopsis thaliana OX=3702 GN=TBL14 PE=2 SV=1	S	Function unknown	PREDICTED: protein trichome birefringence-like 14 [Cucumis melo]
Cla97C11G221010	107	295	303	66	126	51	2.44717	4.39395	5.09368	1.12645	1.67345	0.781413	0.000120089	-1.85545	down	[T]	Signal transduction mechanisms	Molecular Function: protein kinase activity (GO:0004672);; Cellular Component: spindle (GO:0005819);; Biological Process: cell cycle (GO:0007049);; Biological Process: histone phosphorylation (GO:0016572);; Molecular Function: purine ribonucleoside binding (GO:0032550);;	K08850|0|cpep:111788939|serine/threonine-protein kinase Aurora-1	--	[D]	Cell cycle control, cell division, chromosome partitioning	Protein kinase domain;; Protein tyrosine and serine/threonine kinase	sp|Q9M077|AUR1_ARATH Serine/threonine-protein kinase Aurora-1 OS=Arabidopsis thaliana OX=3702 GN=AUR1 PE=1 SV=1	T	Signal transduction mechanisms	serine/threonine-protein kinase Aurora-1 [Cucurbita maxima]
Cla97C02G034880	4277	12638	17437	885	2849	1197	57.391	110.519	171.929	8.91737	22.2224	10.7336	1.9e-09	-3.15585	down	[QV]	Secondary metabolites biosynthesis, transport and catabolism;; Defense mechanisms	Molecular Function: oxidoreductase activity (GO:0016491);; Cellular Component: intrinsic component of membrane (GO:0031224);; Biological Process: single-organism metabolic process (GO:0044710);; Molecular Function: tetrapyrrole binding (GO:0046906);; Molecular Function: transition metal ion binding (GO:0046914);;	--	--	[Q]	Secondary metabolites biosynthesis, transport and catabolism	Cytochrome P450	sp|W8JMU7|CYQ32_CATRO Cytochrome P450 81Q32 OS=Catharanthus roseus OX=4058 GN=CYP81Q32 PE=2 SV=1	Q	Secondary metabolites biosynthesis, transport and catabolism	cytochrome P450 81D11-like [Cucurbita pepo subsp. pepo]
Cla97C07G142290	144	367	988	96	219	114	7.20702	11.9634	36.3532	3.60768	6.3693	3.8168	0.00131786	-2.15428	down	--	--	Molecular Function: phosphoric ester hydrolase activity (GO:0042578);; Biological Process: primary metabolic process (GO:0044238);;	K18696|2.31549e-67|cmo:103494578|glycerophosphodiester phosphodiesterase GDPD3	Glycerophospholipid metabolism (ko00564)	[R]	General function prediction only	Glycerophosphoryl diester phosphodiesterase family	sp|Q9SGA2|GDPD1_ARATH Glycerophosphodiester phosphodiesterase GDPD1, chloroplastic OS=Arabidopsis thaliana OX=3702 GN=GDPD1 PE=1 SV=1	C	Energy production and conversion	PREDICTED: glycerophosphodiester phosphodiesterase GDPD1, chloroplastic isoform X1 [Cucumis melo]
Cla97C06G114500	726	1535	1686	504	711	693	48.5769	66.9587	82.9343	25.3242	27.6789	30.9853	1.02e-05	-1.34985	down	--	--	Cellular Component: microtubule associated complex (GO:0005875);; Biological Process: single-organism cellular process (GO:0044763);;	K10418|1.56494e-57|cpep:111806499|dynein light chain 1, cytoplasmic-like	--	[Z]	Cytoskeleton	Dynein light chain type 1	sp|Q22799|DYL1_CAEEL Dynein light chain 1, cytoplasmic OS=Caenorhabditis elegans OX=6239 GN=dlc-1 PE=1 SV=1	Z	Cytoskeleton	dynein light chain 1, cytoplasmic-like [Cucurbita moschata]
Cla97C02G047560	1109	3302	2597	857	1158	1088	13.463	26.1249	23.1653	7.81211	8.17123	8.83259	7.01e-06	-1.44067	down	[G]	Carbohydrate transport and metabolism	Molecular Function: fucosidase activity (GO:0015928);; Biological Process: primary metabolic process (GO:0044238);;	K01206|0|cpep:111777444|alpha-L-fucosidase 1	Other glycan degradation (ko00511)	[G]	Carbohydrate transport and metabolism	Alpha-L-fucosidase	sp|Q8GW72|FUCO1_ARATH Alpha-L-fucosidase 1 OS=Arabidopsis thaliana OX=3702 GN=FUC1 PE=1 SV=2	G	Carbohydrate transport and metabolism	alpha-L-fucosidase 1 [Cucurbita pepo subsp. pepo]
Cla97C09G172650	428	864	777	229	407	468	8.30612	10.9366	11.0952	3.33508	4.58865	6.07552	0.000302309	-1.21717	down	--	--	Cellular Component: intrinsic component of membrane (GO:0031224);;	--	--	[S]	Function unknown	DUF218 domain	sp|P87055|YDJ7_SCHPO Uncharacterized protein C57A10.07 OS=Schizosaccharomyces pombe (strain 972 / ATCC 24843) OX=284812 GN=SPAC57A10.07 PE=4 SV=1	S	Function unknown	PREDICTED: uncharacterized protein C57A10.07 [Cucumis melo]
Cla97C08G152870	80	133	138	32	25	48	5.76616	6.26879	7.35447	1.71991	1.02458	2.29439	3.48e-05	-2.02551	down	--	--	--	--	--	--	--	Domain of unknown function (DUF3511)	--	S	Function unknown	hypothetical protein E6C27_scaffold82G00330 [Cucumis melo var. makuwa]
Cla97C02G039090	349	960	1364	222	425	310	5.03542	9.04077	14.4779	2.40952	3.56423	2.98833	0.000109228	-1.79395	down	[G]	Carbohydrate transport and metabolism	Biological Process: transport (GO:0006810);; Cellular Component: intrinsic component of membrane (GO:0031224);;	--	--	[G]	Carbohydrate transport and metabolism	Major Facilitator Superfamily	--	G	Carbohydrate transport and metabolism	PREDICTED: protein spinster [Cucumis sativus]
Cla97C11G218110	161	485	422	113	248	209	3.29183	6.46816	6.35099	1.73871	2.95279	2.86258	0.00446073	-1.20351	down	--	--	--	--	--	--	--	--	--	408		hypothetical protein Csa_014189 [Cucumis sativus]
Cla97C08G153040	339	356	441	77	119	109	6.65724	4.54924	6.36382	1.13648	1.35434	1.42014	9e-13	-2.27038	down	[G]	Carbohydrate transport and metabolism	Molecular Function: transferase activity, transferring glycosyl groups (GO:0016757);;	K13691|1.92815e-114|cmo:103488486|UDP-glycosyltransferase 74E2-like	--	[GC]	Carbohydrate transport and metabolism;; Energy production and conversion	UDP-glucoronosyl and UDP-glucosyl transferase	sp|Q9SKC1|U74C1_ARATH UDP-glycosyltransferase 74C1 OS=Arabidopsis thaliana OX=3702 GN=UGT74C1 PE=2 SV=1	CG	Energy production and conversion;; Carbohydrate transport and metabolism	hypothetical protein Csa_018941 [Cucumis sativus]
Cla97C03G053140	4863	15455	15476	4450	6834	6191	55.4603	114.869	129.691	38.1352	45.3105	47.2034	0.000588122	-1.30942	down	[O]	Posttranslational modification, protein turnover, chaperones	--	K09580|0|cmax:111469435|protein disulfide isomerase-like 1-4	Protein processing in endoplasmic reticulum (ko04141)	[O]	Posttranslational modification, protein turnover, chaperones	Thioredoxin;; Thioredoxin-like domain;; Thioredoxin-like;; OST3 / OST6 family, transporter family;; Thioredoxin-like;; Thioredoxin-like domain;; AhpC/TSA family	sp|Q9FF55|PDI14_ARATH Protein disulfide isomerase-like 1-4 OS=Arabidopsis thaliana OX=3702 GN=PDIL1-4 PE=1 SV=1	O	Posttranslational modification, protein turnover, chaperones	protein disulfide isomerase-like 1-4 [Cucurbita maxima]
Cla97C07G135040	228	563	496	168	252	280	5.76238	9.28883	9.22126	3.18061	3.70494	4.72784	0.000837014	-1.16463	down	--	--	Molecular Function: nucleic acid binding transcription factor activity (GO:0001071);; Molecular Function: DNA binding (GO:0003677);; Biological Process: transcription, DNA-templated (GO:0006351);;	K13425|3.22352e-113|cmo:103493141|probable WRKY transcription factor 29	MAPK signaling pathway - plant (ko04016);; Plant-pathogen interaction (ko04626)	--	--	WRKY DNA -binding domain	sp|O04609|WRK22_ARATH WRKY transcription factor 22 OS=Arabidopsis thaliana OX=3702 GN=WRKY22 PE=2 SV=1	K	Transcription	PREDICTED: probable WRKY transcription factor 29 [Cucumis melo]
Cla97C05G108010	347	1534	3732	359	444	211	4.69296	13.5416	37.1651	3.65274	3.49733	1.90824	0.000124682	-2.75334	down	[K]	Transcription	--	--	--	[R]	General function prediction only	Leucine rich repeat;; Leucine Rich repeats (2 copies);; Leucine Rich Repeat	sp|Q8W4Q3|PIRL3_ARATH Plant intracellular Ras-group-related LRR protein 3 OS=Arabidopsis thaliana OX=3702 GN=PIRL3 PE=2 SV=1	S	Function unknown	PREDICTED: plant intracellular Ras-group-related LRR protein 3 [Cucumis melo]
Cla97C08G157120	553	6628	7367	104	489	228	12.141	94.8428	118.86	1.70415	6.23193	3.33983	1.65e-08	-4.45363	down	--	--	Molecular Function: nucleic acid binding transcription factor activity (GO:0001071);; Molecular Function: DNA binding (GO:0003677);; Biological Process: transcription, DNA-templated (GO:0006351);;	--	--	--	--	WRKY DNA -binding domain	sp|Q9SAH7|WRK40_ARATH Probable WRKY transcription factor 40 OS=Arabidopsis thaliana OX=3702 GN=WRKY40 PE=1 SV=1	K	Transcription	probable WRKY transcription factor 40 [Cucurbita moschata]
Cla97C09G175220	695	1886	2304	534	826	711	15.1103	26.7236	36.8154	8.71063	10.4353	10.3236	0.000112136	-1.53052	down	--	--	Molecular Function: nucleic acid binding (GO:0003676);; Cellular Component: intrinsic component of membrane (GO:0031224);;	--	--	[O]	Posttranslational modification, protein turnover, chaperones	Myb-like DNA-binding domain	sp|Q9ASQ2|MAMYB_ARATH Transcription factor MAMYB OS=Arabidopsis thaliana OX=3702 GN=MAMYB PE=1 SV=1	O	Posttranslational modification, protein turnover, chaperones	PREDICTED: dnaJ homolog subfamily C member 2 [Cucumis sativus]
Cla97C04G071760	115	704	2585	72	179	40	2.38239	9.57478	39.642	1.11566	2.17022	0.552597	2.69e-05	-3.90818	down	--	--	Biological Process: transcription, DNA-templated (GO:0006351);;	--	--	--	--	No apical meristem (NAM) protein	sp|Q9FK44|NAC87_ARATH NAC domain-containing protein 87 OS=Arabidopsis thaliana OX=3702 GN=NAC087 PE=2 SV=1	K	Transcription	PREDICTED: NAC domain-containing protein 79-like [Cucumis melo]
Cla97C07G142930	3512	13374	16423	3546	6902	5262	26.2689	65.2071	90.28	19.9324	30.0174	26.3176	0.0045474	-1.37327	down	[T]	Signal transduction mechanisms	Molecular Function: protein kinase activity (GO:0004672);; Biological Process: cellular protein modification process (GO:0006464);; Cellular Component: intrinsic component of membrane (GO:0031224);; Molecular Function: purine ribonucleoside binding (GO:0032550);;	--	--	[T]	Signal transduction mechanisms	Protein tyrosine and serine/threonine kinase;; Protein kinase domain;; Malectin-like domain;; Malectin domain	sp|Q9SCZ4|FERON_ARATH Receptor-like protein kinase FERONIA OS=Arabidopsis thaliana OX=3702 GN=FER PE=1 SV=1	T	Signal transduction mechanisms	PREDICTED: receptor-like protein kinase FERONIA [Cucumis sativus]
Cla97C01G003630	1883	3420	7120	1296	3401	1054	28.6049	33.8708	79.5074	14.791	30.0472	10.7023	0.00727256	-1.49986	down	[OT]	Posttranslational modification, protein turnover, chaperones;; Signal transduction mechanisms	Molecular Function: transferase activity, transferring phosphorus-containing groups (GO:0016772);; Molecular Function: carboxylic acid binding (GO:0031406);;	--	--	--	--	ACT domain;; ACT domain;; ACT domain	sp|Q9LNA5|ACR8_ARATH ACT domain-containing protein ACR8 OS=Arabidopsis thaliana OX=3702 GN=ACR8 PE=2 SV=1	S	Function unknown	PREDICTED: ACT domain-containing protein ACR8-like [Cucumis melo]
Cla97C11G207150	57	130	411	25	106	34	2.57769	3.81649	13.7046	0.842699	2.77775	1.01669	0.00586594	-2.26378	down	--	--	--	--	--	--	--	--	--	A	RNA processing and modification	uncharacterized protein E5676_scaffold349G00130 [Cucumis melo var. makuwa]
Cla97C10G202930	1228	5254	5845	253	433	289	16.6752	46.4979	58.3216	2.57664	3.41586	2.62319	1.01e-15	-3.93528	down	--	--	Molecular Function: transferase activity, transferring glycosyl groups (GO:0016757);;	--	--	[GC]	Carbohydrate transport and metabolism;; Energy production and conversion	UDP-glucoronosyl and UDP-glucosyl transferase	sp|Q9ZQ99|U73C1_ARATH UDP-glycosyltransferase 73C1 OS=Arabidopsis thaliana OX=3702 GN=UGT73C1 PE=2 SV=1	CG	Energy production and conversion;; Carbohydrate transport and metabolism	PREDICTED: UDP-glycosyltransferase 73C1-like [Cucumis melo]
Cla97C07G139690	203	360	742	25	63	59	2.03655	2.3553	5.47831	0.187829	0.36399	0.394594	7.95e-10	-3.49922	down	--	--	Biological Process: anion transport (GO:0006820);; Molecular Function: secondary active transmembrane transporter activity (GO:0015291);; Cellular Component: intrinsic component of membrane (GO:0031224);;	K24194|0|cmo:103489915|boron transporter 4-like	--	[P]	Inorganic ion transport and metabolism	HCO3- transporter family	sp|Q9XI23|BOR4_ARATH Boron transporter 4 OS=Arabidopsis thaliana OX=3702 GN=BOR4 PE=2 SV=1	P	Inorganic ion transport and metabolism	PREDICTED: boron transporter 4-like [Cucumis melo]
Cla97C08G145680	4679	16866	20650	1806	5869	2443	56.3072	132.277	182.595	16.331	41.0614	19.6556	8.81e-06	-2.40168	down	[O]	Posttranslational modification, protein turnover, chaperones	Molecular Function: disulfide oxidoreductase activity (GO:0015036);; Biological Process: cellular homeostasis (GO:0019725);; Biological Process: single-organism metabolic process (GO:0044710);;	K17609|0|cmo:103498642|PDI3; probable nucleoredoxin 1	--	[R]	General function prediction only	Thioredoxin-like;; AhpC/TSA family;; Redoxin;; Thioredoxin;; Thioredoxin-like domain;; SCO1/SenC;; Thioredoxin-like;; Thioredoxin;; C1 domain;; F plasmid transfer operon protein;; Glutaredoxin	sp|O80763|NRX1_ARATH Probable nucleoredoxin 1 OS=Arabidopsis thaliana OX=3702 GN=At1g60420 PE=1 SV=1	O	Posttranslational modification, protein turnover, chaperones	PREDICTED: probable nucleoredoxin 1 [Cucumis melo]
Cla97C08G148030	510	3467	14784	306	687	236	9.25632	41.0741	197.496	4.17408	7.25741	2.86483	3.35e-06	-4.2793	down	--	--	Biological Process: protein localization (GO:0008104);;	K19476|5.92906e-124|mcha:111010325|uncharacterized protein LOC111010325	--	[Z]	Cytoskeleton	Regulator of Vps4 activity in the MVB pathway	--	Z	Cytoskeleton	uncharacterized protein LOC111010325 [Momordica charantia]
Cla97C04G071890	248	419	699	132	389	92	16.4065	18.0821	34.0071	6.53135	14.9607	4.07099	0.00768251	-1.56217	down	--	--	--	--	--	--	--	--	--	141		PREDICTED: uncharacterized protein LOC103485982 [Cucumis melo]
Cla97C09G165240	11223	20296	12247	7593	6297	11643	194.627	229.38	156.052	98.9418	63.4784	134.988	0.00376009	-1.04743	down	[HR]	Coenzyme transport and metabolism;; General function prediction only	Molecular Function: hydrolase activity, acting on acid halide bonds, in C-halide compounds (GO:0019120);;	--	--	[R]	General function prediction only	Alpha/beta hydrolase family;; alpha/beta hydrolase fold;; Serine aminopeptidase, S33	sp|Q8PDW8|OLEB_XANCP Cis-3-alkyl-4-alkyloxetan-2-one decarboxylase OS=Xanthomonas campestris pv. campestris (strain ATCC 33913 / DSM 3586 / NCPPB 528 / LMG 568 / P 25) OX=190485 GN=oleB PE=1 SV=1	S	Function unknown	PREDICTED: uncharacterized protein LOC101210082 [Cucumis sativus]
Cla97C07G132170	812	1964	3191	642	1215	1108	11.3402	17.8857	32.7582	6.73237	9.87069	10.3519	0.00482003	-1.32446	down	[G]	Carbohydrate transport and metabolism	Molecular Function: transferase activity, transferring glycosyl groups (GO:0016757);;	--	--	[GC]	Carbohydrate transport and metabolism;; Energy production and conversion	UDP-glucoronosyl and UDP-glucosyl transferase	sp|U3U992|UGT8_CATRO 7-deoxyloganetic acid glucosyltransferase OS=Catharanthus roseus OX=4058 GN=UGT709C2 PE=1 SV=1	CG	Energy production and conversion;; Carbohydrate transport and metabolism	PREDICTED: 7-deoxyloganetic acid glucosyltransferase-like [Cucumis melo]
Cla97C09G183090	1701	2292	2769	1236	1676	1155	28.2627	24.8187	33.7976	15.4329	16.1853	12.8284	7.86e-06	-1.08074	down	--	--	Molecular Function: endopeptidase activity (GO:0004175);; Biological Process: protein metabolic process (GO:0019538);; Molecular Function: ubiquitin-like protein binding (GO:0032182);;	K11885|0|csv:101218534|protein DNA-DAMAGE INDUCIBLE 1	--	[L]	Replication, recombination and repair	Aspartyl protease;; gag-polyprotein putative aspartyl protease;; Ubiquitin family;; Aspartyl protease;; UBA/TS-N domain;; Retroviral aspartyl protease;; Ubiquitin-2 like Rad60 SUMO-like	sp|Q1EBV4|DDI1_ARATH Protein DNA-DAMAGE INDUCIBLE 1 OS=Arabidopsis thaliana OX=3702 GN=DDI1 PE=1 SV=1	L	Replication, recombination and repair	PREDICTED: DNA damage-inducible protein 1 isoform X2 [Cucumis sativus]
Cla97C03G065550	3447	5559	14145	1535	2046	1093	59.9261	62.9809	180.698	20.0461	20.6783	12.6949	5.75e-07	-2.6431	down	--	--	Cellular Component: intrinsic component of membrane (GO:0031224);;	--	--	[S]	Function unknown	Protein of unknown function (DUF2838)	sp|B9RK42|GPC1_RICCO Glycerophosphocholine acyltransferase 1 OS=Ricinus communis OX=3988 GN=GPC1 PE=1 SV=1	S	Function unknown	PREDICTED: uncharacterized membrane protein C776.05 isoform X1 [Cucumis sativus]
Cla97C01G009380	4156	7045	8588	3080	4990	3298	140.526	155.263	213.37	78.2404	98.0946	74.5584	3.24e-05	-1.1384	down	[R]	General function prediction only	Molecular Function: purine ribonucleoside binding (GO:0032550);; Biological Process: intracellular signal transduction (GO:0035556);; Cellular Component: cell part (GO:0044464);;	K07889|1.04885e-145|cmo:103498306|ras-related protein RABF2b	Endocytosis (ko04144);; Phagosome (ko04145)	[U]	Intracellular trafficking, secretion, and vesicular transport	Ras family;; Ras of Complex, Roc, domain of DAPkinase;; ADP-ribosylation factor family	sp|Q9SN68|RAF2B_ARATH Ras-related protein RABF2b OS=Arabidopsis thaliana OX=3702 GN=RABF2B PE=1 SV=1	U	Intracellular trafficking, secretion, and vesicular transport	PREDICTED: ras-related protein RABF2b [Cucumis melo]
Cla97C09G177380	831	3498	2868	212	663	556	5.86907	16.1068	14.8916	1.1221	2.72303	2.62267	4.6e-07	-2.61949	down	[K]	Transcription	Biological Process: cellular protein modification process (GO:0006464);; Molecular Function: kinase activity (GO:0016301);; Cellular Component: intrinsic component of membrane (GO:0031224);; Molecular Function: purine ribonucleoside binding (GO:0032550);;	--	--	--	--	Protein kinase domain;; Protein tyrosine and serine/threonine kinase;; Leucine rich repeat;; Leucine Rich repeats (2 copies);; Leucine rich repeat N-terminal domain;; Leucine Rich Repeat;; FNIP Repeat	sp|Q8VZG8|MIK2_ARATH MDIS1-interacting receptor like kinase 2 OS=Arabidopsis thaliana OX=3702 GN=MIK2 PE=1 SV=3	T	Signal transduction mechanisms	PREDICTED: probable LRR receptor-like serine/threonine-protein kinase At4g08850 [Cucumis sativus]
Cla97C09G180480	344	1112	1048	492	566	367	18.6017	39.1949	41.6477	19.9793	17.7813	13.2501	0.0085565	-1.0732	down	--	--	--	K11877|8.4484e-82|cpep:111789023|uncharacterized protein LOC111789023 isoform X1	--	[S]	Function unknown	Proteasome assembly chaperone 3	sp|Q2NKS3|PSMG3_BOVIN Proteasome assembly chaperone 3 OS=Bos taurus OX=9913 GN=PSMG3 PE=2 SV=1	S	Function unknown	uncharacterized protein LOC111789023 isoform X1 [Cucurbita pepo subsp. pepo]
Cla97C10G205450	1619	1951	1314	556	1300	1145	20.7371	16.2822	12.3641	5.34778	9.67763	9.80245	0.00184046	-1.09191	down	[M]	Cell wall/membrane/envelope biogenesis	Molecular Function: protein kinase activity (GO:0004672);; Biological Process: cellular protein modification process (GO:0006464);; Biological Process: phosphate-containing compound metabolic process (GO:0006796);; Molecular Function: purine ribonucleoside binding (GO:0032550);; Molecular Function: metal ion binding (GO:0046872);;	K13412|0|cmo:103486289|calcium-dependent protein kinase 13	Plant-pathogen interaction (ko04626)	[T]	Signal transduction mechanisms	Protein kinase domain;; EF hand;; EF-hand domain pair;; Protein tyrosine and serine/threonine kinase;; EF-hand domain;; EF hand;; EF-hand domain pair;; Secreted protein acidic and rich in cysteine Ca binding region;; Lipopolysaccharide kinase (Kdo/WaaP) family	sp|Q8W4I7|CDPKD_ARATH Calcium-dependent protein kinase 13 OS=Arabidopsis thaliana OX=3702 GN=CPK13 PE=1 SV=2	T	Signal transduction mechanisms	PREDICTED: calcium-dependent protein kinase 13 [Cucumis melo]
Cla97C04G077520	2179	4224	4723	1201	1969	1619	45.6236	57.6331	72.6543	18.8959	23.9608	22.6637	3.19e-08	-1.53773	down	[R]	General function prediction only	Molecular Function: oxidoreductase activity (GO:0016491);; Cellular Component: intrinsic component of membrane (GO:0031224);; Biological Process: primary metabolic process (GO:0044238);; Cellular Component: intracellular part (GO:0044424);; Biological Process: single-organism metabolic process (GO:0044710);;	--	--	[R]	General function prediction only	Protein of unknown function (DUF1295);; 3-oxo-5-alpha-steroid 4-dehydrogenase	--	S	Function unknown	PREDICTED: uncharacterized protein LOC103501908 isoform X1 [Cucumis melo]
Cla97C05G103480	323	1192	1967	142	288	105	9.91747	23.8781	44.4157	3.27912	5.14059	2.15193	7.71e-07	-3.02423	down	[G]	Carbohydrate transport and metabolism	Molecular Function: transition metal ion binding (GO:0046914);;	--	--	--	--	Cupin;; Cupin domain	sp|Q9SR72|GL32_ARATH Germin-like protein subfamily 3 member 2 OS=Arabidopsis thaliana OX=3702 GN=At3g10080 PE=2 SV=1	S	Function unknown	hypothetical protein Csa_008694 [Cucumis sativus]
Cla97C10G188020	1612	4911	5709	856	1857	1243	12.7924	25.4031	33.298	5.10228	8.56582	6.59374	6.45e-06	-1.93931	down	[I]	Lipid transport and metabolism	Molecular Function: phospholipase activity (GO:0004620);; Biological Process: glycerophospholipid metabolic process (GO:0006650);; Molecular Function: metal ion binding (GO:0046872);;	K01115|0|cmo:103490965|phospholipase D beta 1-like	Glycerophospholipid metabolism (ko00564);; Ether lipid metabolism (ko00565);; Endocytosis (ko04144)	[I]	Lipid transport and metabolism	Phospholipase D C terminal;; C2 domain;; Phospholipase D Active site motif;; PLD-like domain	sp|P93733|PLDB1_ARATH Phospholipase D beta 1 OS=Arabidopsis thaliana OX=3702 GN=PLDBETA1 PE=1 SV=4	I	Lipid transport and metabolism	PREDICTED: phospholipase D beta 1-like [Cucumis melo]
Cla97C05G083440	430	1221	1448	319	546	365	9.39386	17.4065	23.2845	5.23091	6.93997	5.3317	6.97e-05	-1.63458	down	--	--	--	--	--	--	--	--	--	501		PREDICTED: uncharacterized protein LOC105435079 [Cucumis sativus]
Cla97C01G023220	638	2044	4885	478	624	399	25.3534	52.9803	142.784	14.282	14.4123	10.5997	2.84e-05	-2.62844	down	--	--	--	K23166|5.57768e-88|cpep:111803180|OPA3-like protein	--	[R]	General function prediction only	Optic atrophy 3 protein (OPA3)	sp|Q9P7W0|OPA3_SCHPO OPA3-like protein OS=Schizosaccharomyces pombe (strain 972 / ATCC 24843) OX=284812 GN=SPBC1703.11 PE=3 SV=1	S	Function unknown	OPA3-like protein [Cucurbita pepo subsp. pepo]
Cla97C01G012000	235	414	557	211	259	265	4.4452	5.10154	7.74941	2.98986	2.84604	3.34739	0.00370339	-1.02374	down	[E]	Amino acid transport and metabolism	--	K00797|0|cmo:103488909|spermidine synthase 1-like	Cysteine and methionine metabolism (ko00270);; Arginine and proline metabolism (ko00330);; Glutathione metabolism (ko00480)	[E]	Amino acid transport and metabolism	Spermine/spermidine synthase domain;; Spermidine synthase tetramerisation domain;; Methyltransferase domain;; S-adenosyl-L-methionine-dependent methyltransferase	sp|Q96557|SPDS2_DATST Spermidine synthase 2 OS=Datura stramonium OX=4076 PE=2 SV=1	E	Amino acid transport and metabolism	PREDICTED: spermidine synthase 1-like [Cucumis melo]
Cla97C01G006780	1889	6139	6209	1990	2976	2499	27.1813	57.5645	65.6498	21.5081	24.8952	24.0363	0.0018267	-1.20549	down	--	--	Molecular Function: nucleic acid binding (GO:0003676);; Biological Process: DNA metabolic process (GO:0006259);;	K14011|0|csv:101209321|plant UBX domain-containing protein 2	Protein processing in endoplasmic reticulum (ko04141)	[O]	Posttranslational modification, protein turnover, chaperones	PUB domain;; UBX domain	sp|Q9ZU93|PUX2_ARATH Plant UBX domain-containing protein 2 OS=Arabidopsis thaliana OX=3702 GN=PUX2 PE=1 SV=2	O	Posttranslational modification, protein turnover, chaperones	PREDICTED: UBX domain-containing protein 6 [Cucumis sativus]
Cla97C06G110700	1092	1621	678	397	516	565	55.5266	53.6896	25.306	15.149	15.2429	19.1865	3.62e-05	-1.52502	down	--	--	--	K08903|3.98817e-15|cmax:111498173|photosystem II reaction center PSB28 protein, chloroplastic-like	Photosynthesis (ko00195)	--	--	--	--	C	Energy production and conversion	photosystem II reaction center PSB28 protein, chloroplastic-like [Cucurbita maxima]
Cla97C08G144570	186	344	431	128	214	120	3.76969	4.56299	6.44774	1.94682	2.53276	1.62529	0.000164173	-1.39335	down	[L]	Replication, recombination and repair	--	--	--	--	--	--	--	326		uncharacterized protein LOC111454659 [Cucurbita moschata]
Cla97C09G162400	2677	6261	10452	2057	3908	2686	65.5951	99.9868	188.184	37.8629	55.6698	44.0046	0.000999971	-1.49103	down	--	--	Biological Process: transport (GO:0006810);; Cellular Component: cell part (GO:0044464);;	K12197|3.62653e-126|csv:101216409|ESCRT-related protein CHMP1B	Endocytosis (ko04144)	[U]	Intracellular trafficking, secretion, and vesicular transport	Snf7	sp|Q9SSM4|CHM1B_ARATH ESCRT-related protein CHMP1B OS=Arabidopsis thaliana OX=3702 GN=CHMP1B PE=1 SV=1	U	Intracellular trafficking, secretion, and vesicular transport	PREDICTED: charged multivesicular body protein 1 [Cucumis sativus]
Cla97C11G215690	1247	5783	4712	1549	2041	1535	12.0645	36.4612	33.4964	11.2607	11.476	9.92953	0.00133992	-1.43505	down	[T]	Signal transduction mechanisms	--	--	--	[T]	Signal transduction mechanisms	Protein kinase domain;; Protein tyrosine and serine/threonine kinase	sp|Q8VYG0|LRL13_ARATH LEAF RUST 10 DISEASE-RESISTANCE LOCUS RECEPTOR-LIKE PROTEIN KINASE-like 1.3 OS=Arabidopsis thaliana OX=3702 GN=LRK10L-1.3 PE=2 SV=1	T	Signal transduction mechanisms	PREDICTED: LEAF RUST 10 DISEASE-RESISTANCE LOCUS RECEPTOR-LIKE PROTEIN KINASE-like 1.4 isoform X1 [Cucumis melo]
Cla97C09G165070	121	410	641	20	89	25	3.16102	7.02174	12.3779	0.383763	1.34913	0.430778	7.42e-07	-3.50572	down	--	--	--	--	--	--	--	Plastocyanin-like domain	sp|P29602|CPC_CUCSA Cucumber peeling cupredoxin OS=Cucumis sativus OX=3659 PE=1 SV=3	S	Function unknown	PREDICTED: uncharacterized protein LOC103499800 [Cucumis melo]
Cla97C09G162240	1028	3933	13254	1372	2158	821	7.79159	19.4313	73.8378	7.81492	9.51107	4.15776	0.00200708	-2.3871	down	[T]	Signal transduction mechanisms	Molecular Function: protein kinase activity (GO:0004672);; Cellular Component: membrane (GO:0016020);;	--	--	--	--	Malectin-like domain;; Protein tyrosine and serine/threonine kinase;; Protein kinase domain;; Leucine rich repeat	sp|Q9C8I6|IOS1_ARATH LRR receptor-like serine/threonine-protein kinase IOS1 OS=Arabidopsis thaliana OX=3702 GN=IOS1 PE=1 SV=1	T	Signal transduction mechanisms	PREDICTED: probable LRR receptor-like protein kinase At1g51890 [Cucumis melo]
Cla97C07G142150	2412	6012	7017	2645	2931	1544	236.35	384.039	505.344	194.794	166.971	101.175	0.000645411	-1.39925	down	--	--	Cellular Component: intrinsic component of membrane (GO:0031224);; Cellular Component: intracellular membrane-bounded organelle (GO:0043231);;	--	--	[S]	Function unknown	Ribosome associated membrane protein RAMP4	sp|Q6TAW2|SERP2_MOUSE Stress-associated endoplasmic reticulum protein 2 OS=Mus musculus OX=10090 GN=Serp2 PE=3 SV=2	U	Intracellular trafficking, secretion, and vesicular transport	PREDICTED: stress-associated endoplasmic reticulum protein 2-like [Cucumis sativus]
Cla97C07G142300	255	560	979	219	379	192	5.51339	7.90887	15.5906	3.56601	4.77229	2.76968	0.00223396	-1.51604	down	[I]	Lipid transport and metabolism	Molecular Function: phosphoric ester hydrolase activity (GO:0042578);; Biological Process: primary metabolic process (GO:0044238);;	K18696|5.101e-114|cpep:111800593|glycerophosphodiester phosphodiesterase GDPD3-like	Glycerophospholipid metabolism (ko00564)	[R]	General function prediction only	Glycerophosphoryl diester phosphodiesterase family	sp|Q680A6|GDPD3_ARATH Glycerophosphodiester phosphodiesterase GDPD3 OS=Arabidopsis thaliana OX=3702 GN=GDPD3 PE=2 SV=1	C	Energy production and conversion	glycerophosphodiester phosphodiesterase GDPD3-like [Cucurbita pepo subsp. pepo]
Cla97C02G027860	121	236	599	21	119	13	3.15655	4.02984	11.53	0.410378	1.81069	0.217804	0.000395894	-3.09746	down	--	--	--	K09422|9.40056e-119|cmo:103495551|myb-related protein Myb4-like	--	[K]	Transcription	Myb-like DNA-binding domain;; Myb-like DNA-binding domain	sp|Q7XBH4|MYB4_ORYSJ Transcription factor MYB4 OS=Oryza sativa subsp. japonica OX=39947 GN=MYB4 PE=2 SV=2	K	Transcription	PREDICTED: transcription factor WER-like isoform X2 [Cucumis melo]
Cla97C10G195580	285	192	266	23	87	37	20.0405	8.77967	13.7513	1.18124	3.54545	1.72464	5.1e-07	-2.82825	down	--	--	Cellular Component: intrinsic component of membrane (GO:0031224);;	--	--	--	--	--	--	141		PREDICTED: uncharacterized protein LOC103500281 [Cucumis melo]
Cla97C10G203210	233	107	251	13	113	21	5.11792	1.53529	4.06052	0.211341	1.4449	0.306475	0.00207329	-2.59004	down	--	--	Molecular Function: nucleic acid binding (GO:0003676);;	K09422|2.18832e-132|cmo:103486500|transcription factor RAX2	--	[K]	Transcription	Myb-like DNA-binding domain;; Myb-like DNA-binding domain	sp|Q9FKL2|MYB36_ARATH Transcription factor MYB36 OS=Arabidopsis thaliana OX=3702 GN=MYB36 PE=1 SV=1	K	Transcription	PREDICTED: transcription factor RAX2 [Cucumis melo]
Cla97C05G104360	1649	2760	3917	673	1063	697	25.6364	27.9662	44.7412	7.85594	9.60129	7.23597	1.24e-10	-2.11359	down	--	--	Molecular Function: phosphoprotein phosphatase activity (GO:0004721);; Biological Process: cellular protein modification process (GO:0006464);;	--	--	[T]	Signal transduction mechanisms	Protein phosphatase 2C;; Stage II sporulation protein E (SpoIIE)	sp|Q9M9C6|P2C15_ARATH Probable protein phosphatase 2C 15 OS=Arabidopsis thaliana OX=3702 GN=At1g68410 PE=2 SV=1	T	Signal transduction mechanisms	probable protein phosphatase 2C 15 [Momordica charantia]
Cla97C01G006500	238	446	921	147	376	51	9.18647	11.2119	26.1421	4.25833	8.43252	1.31646	0.00935869	-1.88315	down	--	--	--	--	--	--	--	Domain of unknown function (DUF4228)	--	S	Function unknown	PREDICTED: uncharacterized protein LOC103504565 [Cucumis melo]
Cla97C01G000180	2192	5038	3075	1477	1477	1548	39.002	58.4333	40.2035	19.7446	15.2802	18.41	2.38e-08	-1.45749	down	[R]	General function prediction only	Molecular Function: catalytic activity (GO:0003824);; Biological Process: single-organism metabolic process (GO:0044710);;	K05275|0|csv:101218000|pyridoxal reductase, chloroplastic isoform X1	Vitamin B6 metabolism (ko00750)	[C]	Energy production and conversion	Aldo/keto reductase family	sp|Q56Y42|PLR1_ARATH Pyridoxal reductase, chloroplastic OS=Arabidopsis thaliana OX=3702 GN=PLR1 PE=1 SV=1	C	Energy production and conversion	pyridoxal reductase [Cucumis melo var. makuwa]
Cla97C08G156820	6555	9214	1373	156	1406	1882	305.745	280.071	47.0361	5.46495	38.102	58.6622	0.00179837	-2.70557	down	--	--	--	--	--	--	--	Hydrophobic seed protein;; Protease inhibitor/seed storage/LTP family;; Probable lipid transfer	sp|P14009|14KD_DAUCA 14 kDa proline-rich protein DC2.15 OS=Daucus carota OX=4039 PE=2 SV=1	S	Function unknown	pEARLI1-like lipid transfer protein 1 [Cucurbita maxima]
Cla97C09G163710	1970	3116	2947	632	1290	917	43.8068	45.1664	48.1664	10.5517	16.6806	13.632	8.01e-15	-1.85718	down	--	--	Molecular Function: nucleic acid binding transcription factor activity (GO:0001071);; Molecular Function: DNA binding (GO:0003677);; Biological Process: transcription, DNA-templated (GO:0006351);; Molecular Function: transition metal ion binding (GO:0046914);;	--	--	[K]	Transcription	GATA zinc finger;; CCT motif;; tify domain;; Jas motif	sp|Q8GXL7|GAT24_ARATH GATA transcription factor 24 OS=Arabidopsis thaliana OX=3702 GN=GATA24 PE=1 SV=2	K	Transcription	PREDICTED: GATA transcription factor 24-like isoform X2 [Cucumis sativus]
Cla97C09G180830	517	1732	1853	582	477	619	9.62084	21.0295	25.3656	8.14306	5.16547	7.70468	0.000859972	-1.51858	down	[I]	Lipid transport and metabolism	Biological Process: phosphate-containing compound metabolic process (GO:0006796);; Molecular Function: transferase activity, transferring phosphorus-containing groups (GO:0016772);; Molecular Function: purine ribonucleoside binding (GO:0032550);; Cellular Component: intracellular part (GO:0044424);;	K16190|0|cmo:103498117|glucuronokinase 1	Pentose and glucuronate interconversions (ko00040);; Ascorbate and aldarate metabolism (ko00053);; Amino sugar and nucleotide sugar metabolism (ko00520)	--	--	GHMP kinases N terminal domain;; GHMP kinases C terminal	sp|Q93ZC9|GLAK1_ARATH Glucuronokinase 1 OS=Arabidopsis thaliana OX=3702 GN=GLCAK1 PE=1 SV=1	T	Signal transduction mechanisms	PREDICTED: glucuronokinase 1 [Cucumis melo]
Cla97C09G182000	92	802	1310	21	78	30	0.275126	1.56974	2.89083	0.0474	0.135568	0.060039	6.81e-08	-4.42263	down	[L]	Replication, recombination and repair	Cellular Component: nucleotide-excision repair complex (GO:0000109);; Molecular Function: nucleic acid binding (GO:0003676);; Molecular Function: exonuclease activity (GO:0004527);; Biological Process: DNA metabolic process (GO:0006259);; Molecular Function: DNA polymerase activity (GO:0034061);; Molecular Function: small molecule binding (GO:0036094);; Molecular Function: transition metal ion bi…	K02324|0|mcha:111008850|DNA polymerase epsilon catalytic subunit A-like isoform X1	DNA replication (ko03030);; Base excision repair (ko03410);; Nucleotide excision repair (ko03420)	[L]	Replication, recombination and repair	Domain of unknown function (DUF1744);; DNA polymerase family B, exonuclease domain;; DNA polymerase family B;; Predicted 3'-5' exonuclease related to the exonuclease domain of PolB	sp|F4HW04|DPOE1_ARATH DNA polymerase epsilon catalytic subunit A OS=Arabidopsis thaliana OX=3702 GN=POL2A PE=1 SV=1	L	Replication, recombination and repair	DNA polymerase epsilon catalytic subunit A-like isoform X1 [Momordica charantia]
Cla97C08G161780	4528	9087	13983	4120	6644	4433	168.269	220.057	381.803	115.031	143.54	110.143	0.00206735	-1.18693	down	[R]	General function prediction only	Molecular Function: purine ribonucleoside binding (GO:0032550);; Biological Process: intracellular signal transduction (GO:0035556);; Cellular Component: cell part (GO:0044464);;	K07937|1.09776e-131|thj:104822152|ADP-ribosylation factor 2-like	Endocytosis (ko04144)	[U]	Intracellular trafficking, secretion, and vesicular transport	ADP-ribosylation factor family;; Ras of Complex, Roc, domain of DAPkinase;; Signal recognition particle receptor beta subunit;; Ras family;; Gtr1/RagA G protein conserved region;; 50S ribosome-binding GTPase	sp|P51823|ARF2_ORYSJ ADP-ribosylation factor 2 OS=Oryza sativa subsp. japonica OX=39947 GN=ARF PE=2 SV=2	U	Intracellular trafficking, secretion, and vesicular transport	PREDICTED: ADP-ribosylation factor 2-like [Cucumis melo]
Cla97C01G016290	163	887	1153	210	394	269	3.6463	12.9426	18.9567	3.52338	5.1231	4.02748	0.00749002	-1.61158	down	[T]	Signal transduction mechanisms	Molecular Function: protein kinase activity (GO:0004672);; Biological Process: cellular protein modification process (GO:0006464);; Cellular Component: intrinsic component of membrane (GO:0031224);; Molecular Function: purine ribonucleoside binding (GO:0032550);;	--	--	[T]	Signal transduction mechanisms	Protein tyrosine and serine/threonine kinase;; Protein kinase domain	sp|Q9LK35|THE1_ARATH Receptor-like protein kinase THESEUS 1 OS=Arabidopsis thaliana OX=3702 GN=THE1 PE=1 SV=1	T	Signal transduction mechanisms	PREDICTED: probable receptor-like protein kinase At2g23200 [Cucumis melo]
Cla97C05G101120	2482	4923	6340	1456	2868	1160	45.1246	58.322	84.6936	19.8865	30.3147	14.0945	2.78e-05	-1.67666	down	[U]	Intracellular trafficking, secretion, and vesicular transport	Biological Process: protein metabolic process (GO:0019538);; Cellular Component: intrinsic component of membrane (GO:0031224);; Molecular Function: peptidase activity, acting on L-amino acid peptides (GO:0070011);;	K03100|0|cmo:103493506|thylakoidal processing peptidase 1, chloroplastic-like	Protein export (ko03060)	[O]	Posttranslational modification, protein turnover, chaperones	Signal peptidase, peptidase S26	sp|Q9M9Z2|TPP2_ARATH Probable thylakoidal processing peptidase 2, chloroplastic OS=Arabidopsis thaliana OX=3702 GN=TPP2 PE=2 SV=1	O	Posttranslational modification, protein turnover, chaperones	PREDICTED: thylakoidal processing peptidase 1, chloroplastic-like [Cucumis melo]
Cla97C02G047410	32625	58685	34149	10219	11500	19216	377.835	442.925	290.582	88.9205	77.4264	148.788	5.84e-08	-1.90344	down	[O]	Posttranslational modification, protein turnover, chaperones	Biological Process: protein folding (GO:0006457);; Molecular Function: purine ribonucleoside binding (GO:0032550);; Cellular Component: intracellular part (GO:0044424);;	--	--	[O]	Posttranslational modification, protein turnover, chaperones	TCP-1/cpn60 chaperonin family	sp|P08926|RUBA_PEA RuBisCO large subunit-binding protein subunit alpha, chloroplastic OS=Pisum sativum OX=3888 PE=1 SV=2	O	Posttranslational modification, protein turnover, chaperones	PREDICTED: ruBisCO large subunit-binding protein subunit alpha [Cucumis melo]
Cla97C03G060050	1387	2757	6783	398	516	193	64.2113	83.2149	230.843	13.8387	13.8839	5.96554	1.52e-09	-3.62842	down	--	--	Molecular Function: transferase activity, transferring alkyl or aryl (other than methyl) groups (GO:0016765);; Cellular Component: intrinsic component of membrane (GO:0031224);;	K00799|3.04644e-90|cmo:103499302|microsomal glutathione S-transferase 3	Glutathione metabolism (ko00480)	--	--	MAPEG family	sp|O14880|MGST3_HUMAN Microsomal glutathione S-transferase 3 OS=Homo sapiens OX=9606 GN=MGST3 PE=1 SV=1	S	Function unknown	PREDICTED: microsomal glutathione S-transferase 3 [Cucumis melo]
Cla97C10G194460	76	80	99	43	59	20	2.26686	1.54752	2.17162	0.960505	1.02436	0.387239	0.00789161	-1.44589	down	--	--	Molecular Function: nucleic acid binding (GO:0003676);;	K09422|6.28108e-112|csv:101205702|transcription factor MYB108	--	[K]	Transcription	Myb-like DNA-binding domain;; Myb-like DNA-binding domain	sp|Q10MB4|MYB2_ORYSJ Transcription factor MYB2 OS=Oryza sativa subsp. japonica OX=39947 GN=MYB2 PE=2 SV=1	K	Transcription	PREDICTED: transcription factor MYB108-like [Cucumis sativus]
Cla97C10G201300	360	1353	2926	468	399	321	9.67491	23.7544	57.9141	9.46921	6.23642	5.77057	0.000678749	-2.21648	down	[KT]	Transcription;; Signal transduction mechanisms	--	--	--	--	--	Lecithin retinol acyltransferase	--	S	Function unknown	PREDICTED: uncharacterized protein LOC101207710 [Cucumis sativus]
Cla97C01G023390	661	2003	4150	714	1147	994	18.0847	35.7339	83.4844	14.6748	18.2534	18.1847	0.00656513	-1.55572	down	--	--	Cellular Component: intrinsic component of membrane (GO:0031224);; Molecular Function: transition metal ion binding (GO:0046914);;	K19038|7.82125e-90|cmo:103484472|E3 ubiquitin-protein ligase ATL41-like	--	[O]	Posttranslational modification, protein turnover, chaperones	Ring finger domain;; RING-like zinc finger;; RING-H2 zinc finger domain;; Zinc finger, C3HC4 type (RING finger);; Zinc finger, C3HC4 type (RING finger);; zinc-RING finger domain;; Anaphase-promoting complex subunit 11 RING-H2 finger	sp|Q9SLC3|ATL41_ARATH E3 ubiquitin-protein ligase ATL41 OS=Arabidopsis thaliana OX=3702 GN=ATL41 PE=1 SV=1	O	Posttranslational modification, protein turnover, chaperones	PREDICTED: E3 ubiquitin-protein ligase ATL41-like [Cucumis melo]
Cla97C11G219170	2253	8437	7217	1989	3086	2036	22.64	55.2528	53.2846	15.0136	18.0289	13.6801	5.81e-05	-1.60008	down	--	--	Cellular Component: intrinsic component of membrane (GO:0031224);;	--	--	[R]	General function prediction only	C2 domain	sp|Q9UT00|YKH3_SCHPO Uncharacterized protein PYUK71.03c OS=Schizosaccharomyces pombe (strain 972 / ATCC 24843) OX=284812 GN=SPAPYUK71.03c PE=1 SV=1	S	Function unknown	PREDICTED: tricalbin-3-like [Cucumis melo]
Cla97C10G205910	337	1374	1405	39	295	65	7.32282	19.4667	22.449	0.624234	3.72426	0.943757	4.57e-06	-3.35464	down	[IQR]	Lipid transport and metabolism;; Secondary metabolites biosynthesis, transport and catabolism;; General function prediction only	Molecular Function: fatty acid synthase activity (GO:0004312);; Biological Process: single-organism metabolic process (GO:0044710);;	--	--	[R]	General function prediction only	Enoyl-(Acyl carrier protein) reductase;; short chain dehydrogenase;; KR domain	sp|Q9SCU0|SDR2A_ARATH Short-chain dehydrogenase reductase 2a OS=Arabidopsis thaliana OX=3702 GN=SDR2a PE=3 SV=1	Q	Secondary metabolites biosynthesis, transport and catabolism	PREDICTED: short-chain dehydrogenase reductase 2a [Cucumis melo]
Cla97C10G194930	198	372	377	158	264	118	3.79562	4.64817	5.30849	2.2805	2.94791	1.51324	0.00152529	-1.14894	down	--	--	Molecular Function: transferase activity, transferring acyl groups other than amino-acyl groups (GO:0016747);; Cellular Component: intrinsic component of membrane (GO:0031224);;	--	--	--	--	Membrane bound O-acyl transferase family	sp|Q9SV07|ASAT1_ARATH Acyl-CoA--sterol O-acyltransferase 1 OS=Arabidopsis thaliana OX=3702 GN=ASAT1 PE=1 SV=1	S	Function unknown	PREDICTED: acyl-CoA--sterol O-acyltransferase 1-like [Cucumis sativus]
Cla97C07G144430	1126	1696	2099	588	886	452	35.7266	35.0771	48.9636	14.0177	16.346	9.57767	5.77e-08	-1.70309	down	[J]	Translation, ribosomal structure and biogenesis	Molecular Function: small molecule binding (GO:0036094);; Molecular Function: organic cyclic compound binding (GO:0097159);;	K14396|2.36846e-101|cpep:111810737|polyadenylate-binding protein 2-like	mRNA surveillance pathway (ko03015)	[A]	RNA processing and modification	RNA recognition motif. (a.k.a. RRM, RBD, or RNP domain)	sp|Q9LX90|PABN3_ARATH Polyadenylate-binding protein 3 OS=Arabidopsis thaliana OX=3702 GN=PABN3 PE=1 SV=1	A	RNA processing and modification	polyadenylate-binding protein 2-like [Cucurbita moschata]
Cla97C02G045860	426	1007	1005	390	626	356	13.1991	20.3445	22.8891	9.08378	11.2853	7.38421	0.00059973	-1.14056	down	[R]	General function prediction only	Molecular Function: purine ribonucleoside binding (GO:0032550);; Biological Process: intracellular signal transduction (GO:0035556);; Cellular Component: cell part (GO:0044464);;	K07904|8.40269e-150|csv:101207101|ras-related protein Rab11C	Endocytosis (ko04144)	[U]	Intracellular trafficking, secretion, and vesicular transport	Ras family;; Ras of Complex, Roc, domain of DAPkinase;; ADP-ribosylation factor family;; 50S ribosome-binding GTPase	sp|Q40193|RB11C_LOTJA Ras-related protein Rab11C OS=Lotus japonicus OX=34305 GN=RAB11C PE=2 SV=1	U	Intracellular trafficking, secretion, and vesicular transport	ras-related protein Rab2BV [Cucumis melo var. makuwa]
Cla97C05G088730	602	746	396	103	288	239	58.9788	47.6487	28.4628	7.55394	16.3941	15.6003	2.23e-05	-1.86574	down	--	--	Cellular Component: cell part (GO:0044464);;	--	--	--	--	Rapid ALkalinization Factor (RALF)	sp|O23262|RLF32_ARATH Protein RALF-like 32 OS=Arabidopsis thaliana OX=3702 GN=RALFL32 PE=3 SV=1	S	Function unknown	protein RALF-like 32 [Cucurbita pepo subsp. pepo]
Cla97C03G056680	109	74	344	14	15	19	0.862111	0.380243	2.00665	0.078431	0.066874	0.096994	2.56e-07	-3.81479	down	[T]	Signal transduction mechanisms	--	--	--	--	--	Protein tyrosine and serine/threonine kinase;; Protein kinase domain;; D-mannose binding lectin;; S-locus glycoprotein domain;; PAN-like domain;; Domain of unknown function (DUF3403)	sp|Q9SXB8|Y1133_ARATH G-type lectin S-receptor-like serine/threonine-protein kinase At1g11330 OS=Arabidopsis thaliana OX=3702 GN=At1g11330 PE=1 SV=3	T	Signal transduction mechanisms	PREDICTED: G-type lectin S-receptor-like serine/threonine-protein kinase At1g11330 [Cucumis melo]
Cla97C07G141890	932	3649	4219	402	1322	442	17.4074	44.4211	57.9125	5.63263	14.3513	5.51905	3.77e-05	-2.36524	down	--	--	Molecular Function: nucleic acid binding transcription factor activity (GO:0001071);; Molecular Function: DNA binding (GO:0003677);; Biological Process: transcription, DNA-templated (GO:0006351);;	--	--	--	--	WRKY DNA -binding domain	sp|Q8H0Y8|WRK41_ARATH Probable WRKY transcription factor 41 OS=Arabidopsis thaliana OX=3702 GN=WRKY41 PE=2 SV=2	K	Transcription	PREDICTED: probable WRKY transcription factor 41 [Cucumis melo]
Cla97C04G074130	55	300	1459	12	18	4	1.65004	5.94767	32.6508	0.269673	0.3135	0.076861	4.05e-09	-6.06287	down	[O]	Posttranslational modification, protein turnover, chaperones	--	K00799|3.05727e-101|cmo:103490830|probable glutathione S-transferase	Glutathione metabolism (ko00480)	[O]	Posttranslational modification, protein turnover, chaperones	Glutathione S-transferase, N-terminal domain;; Glutathione S-transferase, C-terminal domain;; Glutathione S-transferase, N-terminal domain;; Glutathione S-transferase, N-terminal domain;; Glutathione S-transferase, C-terminal domain;; Glutathione S-transferase, C-terminal domain	sp|Q9SR36|GSTU8_ARATH Glutathione S-transferase U8 OS=Arabidopsis thaliana OX=3702 GN=GSTU8 PE=2 SV=1	O	Posttranslational modification, protein turnover, chaperones	PREDICTED: probable glutathione S-transferase [Cucumis melo]
Cla97C05G104720	207	1655	5061	98	206	213	6.59439	34.3974	118.616	2.33697	3.80387	4.53971	3.32e-06	-4.03921	down	--	--	Biological Process: protein localization (GO:0008104);;	K19476|9.41567e-131|cmo:103489273|midasin	--	[Z]	Cytoskeleton	Regulator of Vps4 activity in the MVB pathway	sp|Q54I39|IST1L_DICDI IST1-like protein OS=Dictyostelium discoideum OX=44689 GN=DDB_G0289029 PE=3 SV=1	Z	Cytoskeleton	PREDICTED: midasin [Cucumis melo]
Cla97C05G094230	84	230	787	17	76	47	2.52038	4.54254	17.5249	0.370866	1.32443	0.940902	5.42e-05	-3.35103	down	--	--	--	--	--	--	--	Cotton fibre expressed protein	--	S	Function unknown	uncharacterized protein LOC111435119 [Cucurbita moschata]
Cla97C10G204960	813	1555	4352	430	553	439	27.6165	34.4344	108.662	10.9564	10.9072	9.95841	8.94e-06	-2.55636	down	[L]	Replication, recombination and repair	--	--	--	--	--	SOUL heme-binding protein	sp|Q9SR77|HBPL1_ARATH Heme-binding-like protein At3g10130, chloroplastic OS=Arabidopsis thaliana OX=3702 GN=At3g10130 PE=1 SV=1	S	Function unknown	PREDICTED: heme-binding-like protein At3g10130, chloroplastic [Cucumis melo]
Cla97C08G155460	2290	1876	415	201	865	554	62.445	33.3313	8.30343	4.1071	13.7013	10.0974	0.00557891	-1.99386	down	[G]	Carbohydrate transport and metabolism	Cellular Component: intrinsic component of membrane (GO:0031224);; Biological Process: establishment of localization (GO:0051234);;	K09873|4.43389e-137|cmo:103488186|aquaporin TIP4-1	--	[G]	Carbohydrate transport and metabolism	Major intrinsic protein	sp|O82316|TIP41_ARATH Aquaporin TIP4-1 OS=Arabidopsis thaliana OX=3702 GN=TIP4-1 PE=2 SV=1	G	Carbohydrate transport and metabolism	PREDICTED: aquaporin TIP4-1 [Cucumis melo]
Cla97C05G085940	2301	2135	8665	36	35	26	81.0244	48.9997	224.256	0.94178	0.70596	0.589669	8.08e-33	-7.41756	down	--	--	--	--	--	--	--	Chlorophyll A-B binding protein	sp|P93735|ELIP1_ARATH Early light-induced protein 1, chloroplastic OS=Arabidopsis thaliana OX=3702 GN=ELIP1 PE=1 SV=1	S	Function unknown	early light-induced protein 1 [Cucumis melo var. makuwa]
Cla97C07G133100	341	1737	1021	94	150	452	9.85059	32.7189	21.6754	2.02083	2.5081	8.72405	0.000721142	-2.35136	down	--	--	--	K14496|8.23376e-119|csv:101219833|abscisic acid receptor PYL4	MAPK signaling pathway - plant (ko04016);; Plant hormone signal transduction (ko04075)	--	--	Polyketide cyclase / dehydrase and lipid transport;; Pathogenesis-related protein Bet v 1 family;; Polyketide cyclase / dehydrase and lipid transport	sp|O80920|PYL4_ARATH Abscisic acid receptor PYL4 OS=Arabidopsis thaliana OX=3702 GN=PYL4 PE=1 SV=1	S	Function unknown	PREDICTED: abscisic acid receptor PYL4-like [Cucumis sativus]
Cla97C01G004390	64	359	533	75	37	59	0.756971	2.76534	4.63591	0.665274	0.249959	0.461387	0.000310546	-2.66918	down	[M]	Cell wall/membrane/envelope biogenesis	Cellular Component: intrinsic component of membrane (GO:0031224);;	--	--	[GMW]	Carbohydrate transport and metabolism;; Cell wall/membrane/envelope biogenesis;; Extracellular structures	Exostosin family	sp|Q9FFN2|GLYT3_ARATH Probable glycosyltransferase At5g03795 OS=Arabidopsis thaliana OX=3702 GN=At5g03795 PE=3 SV=2	GMW	Carbohydrate transport and metabolism;; Cell wall/membrane/envelope biogenesis;; Extracellular structures	PREDICTED: probable glycosyltransferase At5g03795 [Cucumis melo]
Cla97C01G014990	710	4314	6140	29	253	65	24.8762	98.5232	158.085	0.755208	5.15401	1.5153	3.93e-11	-5.39254	down	--	--	Molecular Function: nucleic acid binding transcription factor activity (GO:0001071);; Molecular Function: DNA binding (GO:0003677);; Biological Process: transcription, DNA-templated (GO:0006351);;	--	--	--	--	WRKY DNA -binding domain	sp|Q93WU9|WRK51_ARATH Probable WRKY transcription factor 51 OS=Arabidopsis thaliana OX=3702 GN=WRKY51 PE=1 SV=1	K	Transcription	PREDICTED: probable WRKY transcription factor 51 [Cucumis melo]
Cla97C04G074260	59	246	218	3	14	2	1.58551	4.3578	4.34836	0.055466	0.221124	0.033915	2.35e-10	-5.12097	down	[O]	Posttranslational modification, protein turnover, chaperones	--	K00799|1.63956e-84|csv:101214027|probable glutathione S-transferase	Glutathione metabolism (ko00480)	[O]	Posttranslational modification, protein turnover, chaperones	Glutathione S-transferase, C-terminal domain;; Glutathione S-transferase, C-terminal domain;; Glutathione S-transferase, N-terminal domain;; Glutathione S-transferase, N-terminal domain;; Glutathione S-transferase, N-terminal domain	sp|Q9ZW24|GSTU7_ARATH Glutathione S-transferase U7 OS=Arabidopsis thaliana OX=3702 GN=GSTU7 PE=2 SV=1	O	Posttranslational modification, protein turnover, chaperones	PREDICTED: probable glutathione S-transferase [Cucumis sativus]
Cla97C04G078360	421	572	485	141	196	281	5.42023	4.79753	4.58195	1.35704	1.46471	2.41995	4.03e-06	-1.59153	down	--	--	Cellular Component: intrinsic component of membrane (GO:0031224);;	K23280|0|cmo:103494813|uncharacterized protein At1g04910-like	--	--	--	GDP-fucose protein O-fucosyltransferase	sp|Q4V398|RRT1_ARATH Rhamnogalacturonan I rhamnosyltransferase 1 OS=Arabidopsis thaliana OX=3702 GN=RRT1 PE=1 SV=1	G	Carbohydrate transport and metabolism	PREDICTED: uncharacterized protein At1g04910-like [Cucumis melo]
Cla97C06G112640	2932	5006	10859	330	1199	326	43.6691	48.5973	118.86	3.69398	10.3761	3.24164	4.67e-10	-3.7585	down	[G]	Carbohydrate transport and metabolism	Molecular Function: transferase activity, transferring glycosyl groups (GO:0016757);;	--	--	[GC]	Carbohydrate transport and metabolism;; Energy production and conversion	UDP-glucoronosyl and UDP-glucosyl transferase	sp|K4CWS6|U75C1_SOLLC UDP-glycosyltransferase 75C1 OS=Solanum lycopersicum OX=4081 GN=UGT75C1 PE=1 SV=1	CG	Energy production and conversion;; Carbohydrate transport and metabolism	PREDICTED: crocetin glucosyltransferase, chloroplastic-like [Cucumis melo]
Cla97C02G033330	864	638	1589	299	554	287	11.7564	5.65314	15.8881	3.04927	4.3784	2.60839	7.86e-05	-1.86032	down	[G]	Carbohydrate transport and metabolism	--	--	--	[GC]	Carbohydrate transport and metabolism;; Energy production and conversion	UDP-glucoronosyl and UDP-glucosyl transferase	sp|V5LLZ9|GGT_QUERO Gallate 1-beta-glucosyltransferase OS=Quercus robur OX=38942 GN=UGT84A13 PE=1 SV=1	CG	Energy production and conversion;; Carbohydrate transport and metabolism	PREDICTED: putative UDP-glucose glucosyltransferase [Cucumis melo]
Cla97C03G067950	50	136	248	57	28	49	0.310772	0.554003	1.14299	0.26546	0.099743	0.204925	0.00576875	-1.92164	down	--	--	--	K10406|0|cmo:103492129|kinesin-4	--	[Z]	Cytoskeleton	Kinesin motor domain;; Microtubule binding;; Calponin homology (CH) domain	sp|F4IL57|KN14I_ARATH Kinesin-like protein KIN-14I OS=Arabidopsis thaliana OX=3702 GN=KIN14I PE=2 SV=1	Z	Cytoskeleton	PREDICTED: kinesin-4 isoform X1 [Cucumis melo]
Cla97C10G184760	900	2266	3223	764	1096	807	15.0178	24.6579	39.5392	9.58358	10.6369	8.99954	0.000186514	-1.55968	down	[T]	Signal transduction mechanisms	Molecular Function: protein tyrosine kinase activity (GO:0004713);; Biological Process: protein phosphorylation (GO:0006468);; Molecular Function: purine ribonucleoside binding (GO:0032550);;	--	--	[T]	Signal transduction mechanisms	Protein tyrosine and serine/threonine kinase;; Protein kinase domain	sp|P27450|CST_ARATH Probable serine/threonine-protein kinase CST OS=Arabidopsis thaliana OX=3702 GN=CST PE=1 SV=2	T	Signal transduction mechanisms	probable serine/threonine-protein kinase PIX13 [Cucurbita pepo subsp. pepo]
Cla97C02G035230	720	1065	1979	552	972	513	12.1934	11.7458	24.6215	7.01778	9.56871	5.80682	0.00337616	-1.24739	down	[HR]	Coenzyme transport and metabolism;; General function prediction only	--	--	--	--	--	alpha/beta hydrolase fold;; Alpha/beta hydrolase family;; Serine aminopeptidase, S33	--	S	Function unknown	PREDICTED: uncharacterized protein LOC103495960 isoform X3 [Cucumis melo]
Cla97C06G117660	9935	9654	4972	3489	5529	5546	142.35	90.1485	52.3466	37.5637	46.0575	53.1305	0.00428913	-1.15039	down	[E]	Amino acid transport and metabolism	Biological Process: one-carbon metabolic process (GO:0006730);; Biological Process: serine family amino acid metabolic process (GO:0009069);; Molecular Function: hydroxymethyl-, formyl- and related transferase activity (GO:0016742);; Molecular Function: anion binding (GO:0043168);;	K00600|0|cmo:103496952|6F11; serine hydroxymethyltransferase 4	Glycine, serine and threonine metabolism (ko00260);; Cyanoamino acid metabolism (ko00460);; Glyoxylate and dicarboxylate metabolism (ko00630);; One carbon pool by folate (ko00670);; Carbon metabolism (ko01200);; Biosynthesis of amino acids (ko01230);; Biosynthesis of cofactors (ko01240)	[E]	Amino acid transport and metabolism	Serine hydroxymethyltransferase	sp|O23254|GLYC4_ARATH Serine hydroxymethyltransferase 4 OS=Arabidopsis thaliana OX=3702 GN=SHM4 PE=1 SV=1	E	Amino acid transport and metabolism	PREDICTED: serine hydroxymethyltransferase 4 [Cucumis melo]
Cla97C03G067850	116	49	584	22	92	2	1.92511	0.528675	7.154	0.267533	0.884593	0.020023	0.00820922	-3.20195	down	--	--	--	--	--	--	--	Calmodulin binding protein-like	sp|F4K2R6|CB60G_ARATH Calmodulin-binding protein 60 G OS=Arabidopsis thaliana OX=3702 GN=CBP60G PE=1 SV=1	S	Function unknown	PREDICTED: uncharacterized protein LOC101206669 [Cucumis sativus]
Cla97C08G153540	820	1842	2241	322	767	437	15.0649	22.0548	30.2494	4.43903	8.18497	5.36894	2.84e-07	-2.02729	down	--	--	--	K20782|0|cmo:103488442|uncharacterized LOC103488442	Other types of O-glycan biosynthesis (ko00514)	--	--	--	sp|G7LG31|RDN2_MEDTR Hydroxyproline O-arabinosyltransferase RDN2 OS=Medicago truncatula OX=3880 GN=RDN2 PE=3 SV=1	S	Function unknown	hypothetical protein Csa_003548 [Cucumis sativus]
Cla97C07G130850	348	544	1125	318	473	211	7.9832	8.14922	19.0042	5.49468	6.31988	3.23421	0.00682247	-1.35756	down	[T]	Signal transduction mechanisms	Molecular Function: phosphoprotein phosphatase activity (GO:0004721);; Biological Process: cellular protein modification process (GO:0006464);;	K17506|0|cmo:103495482|probable protein phosphatase 2C 58	--	[T]	Signal transduction mechanisms	Protein phosphatase 2C	sp|Q93YW5|P2C58_ARATH Probable protein phosphatase 2C 58 OS=Arabidopsis thaliana OX=3702 GN=At4g28400 PE=2 SV=1	T	Signal transduction mechanisms	PREDICTED: probable protein phosphatase 2C 58 [Cucumis melo]
Cla97C04G075240	112	741	1294	69	116	161	1.27762	5.54806	10.9329	0.591934	0.77263	1.23387	0.000109751	-2.88986	down	--	--	Biological Process: vesicle-mediated transport (GO:0016192);; Cellular Component: protein complex (GO:0043234);;	K07195|0|cmo:103489875|exocyst complex component EXO70A1	--	[U]	Intracellular trafficking, secretion, and vesicular transport	Exo70 exocyst complex subunit	sp|Q8VY27|E70H1_ARATH Exocyst complex component EXO70H1 OS=Arabidopsis thaliana OX=3702 GN=EXO70H1 PE=1 SV=1	U	Intracellular trafficking, secretion, and vesicular transport	PREDICTED: exocyst complex component EXO70A1 [Cucumis melo]
Cla97C09G182640	401	855	541	225	342	320	7.60942	10.5847	7.54132	3.20905	3.77659	4.061	2.32e-07	-1.31831	down	[P]	Inorganic ion transport and metabolism	Molecular Function: potassium channel activity (GO:0005267);; Biological Process: cellular metal ion homeostasis (GO:0006875);; Cellular Component: intrinsic component of membrane (GO:0031224);; Cellular Component: vacuolar part (GO:0044437);; Biological Process: cellular potassium ion transport (GO:0071804);;	K05389|0|cmo:103501240|two-pore potassium channel 1	--	[P]	Inorganic ion transport and metabolism	Ion channel;; Ion transport protein	sp|Q8LBL1|KCO1_ARATH Two-pore potassium channel 1 OS=Arabidopsis thaliana OX=3702 GN=TPK1 PE=1 SV=2	P	Inorganic ion transport and metabolism	two-pore potassium channel 1 isoform X1 [Cucumis melo var. makuwa]
Cla97C01G004380	646	1417	1795	705	1029	578	15.4713	22.1362	31.6242	12.6908	14.34	9.26231	0.00479348	-1.05266	down	[S]	Function unknown	Cellular Component: intrinsic component of membrane (GO:0031224);;	--	--	--	--	Mitochondrial biogenesis AIM24	--	S	Function unknown	PREDICTED: uncharacterized protein LOC103482594 [Cucumis melo]
Cla97C11G222060	1221	3420	3532	1029	1692	1274	12.8559	23.4785	27.3351	8.14305	10.3597	8.97059	0.000189704	-1.32624	down	--	--	Cellular Component: intrinsic component of membrane (GO:0031224);;	K20784|0|cmo:103487624|arabinosyltransferase XEG113	Other types of O-glycan biosynthesis (ko00514)	--	--	Nucleotide-diphospho-sugar transferase	sp|Q8VXZ5|XG113_ARATH Arabinosyltransferase XEG113 OS=Arabidopsis thaliana OX=3702 GN=XEG113 PE=2 SV=1	S	Function unknown	PREDICTED: arabinosyltransferase XEG113 [Cucumis melo]
Cla97C02G043450	1003	1700	1243	401	295	517	24.7489	27.3352	22.532	7.43328	4.2221	8.51623	2.1e-08	-1.97479	down	--	--	--	--	--	--	--	PDDEXK-like family of unknown function	--	S	Function unknown	PREDICTED: uncharacterized protein LOC101208067 [Cucumis sativus]
Cla97C11G220380	52	100	215	49	62	30	0.942107	1.18291	2.88249	0.669126	0.659218	0.355456	0.00754039	-1.70133	down	--	--	Cellular Component: intrinsic component of membrane (GO:0031224);; Molecular Function: transition metal ion binding (GO:0046914);;	K10664|1.85207e-158|cmax:111476502|RING-H2 finger protein ATL11-like	--	[O]	Posttranslational modification, protein turnover, chaperones	Ring finger domain;; RING-like zinc finger;; Zinc finger, C3HC4 type (RING finger);; RING-H2 zinc finger domain;; RING-type zinc-finger;; Zinc finger, C3HC4 type (RING finger)	sp|Q84W40|ATL11_ARATH RING-H2 finger protein ATL11 OS=Arabidopsis thaliana OX=3702 GN=ATL11 PE=2 SV=2	O	Posttranslational modification, protein turnover, chaperones	RING-H2 finger protein ATL11-like [Cucurbita maxima]
Cla97C03G058580	99	494	1140	154	248	145	4.09958	13.3437	34.7356	4.77542	5.96607	4.00757	0.00737084	-1.95946	down	[R]	General function prediction only	Biological Process: cellular protein modification process (GO:0006464);; Molecular Function: kinase activity (GO:0016301);; Molecular Function: purine ribonucleoside binding (GO:0032550);; Molecular Function: transition metal ion binding (GO:0046914);;	--	--	--	--	WD domain, G-beta repeat	--	S	Function unknown	PREDICTED: uncharacterized protein LOC103487210 [Cucumis melo]
Cla97C02G036810	3821	22297	26877	2569	4905	2502	87.0021	330.898	449.707	43.951	64.9301	38.0836	4.46e-06	-2.68816	down	--	--	Molecular Function: nucleic acid binding (GO:0003676);; Biological Process: transcription, DNA-templated (GO:0006351);; Cellular Component: intracellular membrane-bounded organelle (GO:0043231);;	--	--	--	--	No apical meristem (NAM) protein	sp|Q10S65|NAC22_ORYSJ NAC domain-containing protein 22 OS=Oryza sativa subsp. japonica OX=39947 GN=NAC022 PE=2 SV=1	K	Transcription	PREDICTED: NAC domain-containing protein 67-like [Cucumis sativus]
Cla97C05G098010	1439	3280	5921	1521	2064	1390	38.5976	57.3558	116.751	30.657	32.2029	24.9425	0.0026719	-1.40435	down	[N]	Cell motility	--	--	--	--	--	Tetratricopeptide repeat;; Tetratricopeptide repeat	--	S	Function unknown	PREDICTED: uncharacterized protein LOC109013907 [Juglans regia]
Cla97C07G135420	274	608	349	86	240	199	2.15736	3.12915	2.02092	0.5056	1.10223	1.05075	0.000124787	-1.55759	down	--	--	Molecular Function: binding (GO:0005488);;	K11498|0|cmo:103493175|kinesin-like protein NACK2	--	[Z]	Cytoskeleton	Kinesin motor domain;; Domain of unknown function (DUF3490);; Microtubule binding	sp|Q6H638|KN7C_ORYSJ Kinesin-like protein KIN-7C OS=Oryza sativa subsp. japonica OX=39947 GN=KIN7C PE=2 SV=1	Z	Cytoskeleton	PREDICTED: kinesin-like protein NACK2 isoform X1 [Cucumis melo]
Cla97C09G168850	735	2360	3064	463	565	942	37.6394	78.7826	115.339	17.7933	16.8055	32.2385	0.000244805	-1.8998	down	--	--	Molecular Function: disulfide oxidoreductase activity (GO:0015036);; Biological Process: cellular homeostasis (GO:0019725);; Biological Process: single-organism metabolic process (GO:0044710);;	K03676|5.41484e-77|mcha:111017633|monothiol glutaredoxin-S1-like	--	[O]	Posttranslational modification, protein turnover, chaperones	Glutaredoxin	sp|Q9SA68|GRXS1_ARATH Monothiol glutaredoxin-S1 OS=Arabidopsis thaliana OX=3702 GN=GRXS1 PE=3 SV=1	O	Posttranslational modification, protein turnover, chaperones	monothiol glutaredoxin-S1-like [Momordica charantia]
Cla97C07G143770	94	91	217	3	7	0	7.07404	4.48641	12.1088	0.135523	0.271266	0	2.84e-10	-5.75006	down	--	--	--	--	--	--	--	--	--	--	--	hypothetical protein Csa_015279 [Cucumis sativus]
Cla97C08G156390	2867	3744	3829	1615	2597	1930	26.962	22.9507	26.4595	11.4128	14.1992	12.1349	4.47e-09	-1.12641	down	[HI]	Coenzyme transport and metabolism;; Lipid transport and metabolism	Biological Process: terpenoid metabolic process (GO:0006721);; Molecular Function: transferase activity, transferring aldehyde or ketonic groups (GO:0016744);;	K01662|0|csv:101220427|probable 1-deoxy-D-xylulose-5-phosphate synthase, chloroplastic	Thiamine metabolism (ko00730);; Terpenoid backbone biosynthesis (ko00900)	[G]	Carbohydrate transport and metabolism	1-deoxy-D-xylulose-5-phosphate synthase;; Transketolase, C-terminal domain;; Transketolase, pyrimidine binding domain	sp|O22567|DXS1_ORYSJ 1-deoxy-D-xylulose-5-phosphate synthase 1, chloroplastic OS=Oryza sativa subsp. japonica OX=39947 GN=CLA1 PE=2 SV=2	G	Carbohydrate transport and metabolism	PREDICTED: probable 1-deoxy-D-xylulose-5-phosphate synthase, chloroplastic [Cucumis sativus]
Cla97C03G067630	11359	24936	39206	266	453	359	177.834	254.419	451	3.12118	4.11743	3.7552	3.08e-54	-6.44899	down	[O]	Posttranslational modification, protein turnover, chaperones	Molecular Function: protein binding (GO:0005515);; Biological Process: cellular process (GO:0009987);; Molecular Function: purine ribonucleoside binding (GO:0032550);; Biological Process: response to stimulus (GO:0050896);;	K04079|0|csv:101207890|heat shock cognate protein 80	Protein processing in endoplasmic reticulum (ko04141);; Plant-pathogen interaction (ko04626)	[O]	Posttranslational modification, protein turnover, chaperones	Hsp90 protein	sp|P36181|HSP80_SOLLC Heat shock cognate protein 80 OS=Solanum lycopersicum OX=4081 GN=HSC80 PE=2 SV=1	O	Posttranslational modification, protein turnover, chaperones	PREDICTED: heat shock cognate protein 80-like [Cucumis sativus]
Cla97C05G087090	1005	2028	2038	587	665	554	22.3483	29.4	33.3049	9.80687	8.5901	8.23774	1.23e-11	-1.78279	down	[JO]	Translation, ribosomal structure and biogenesis;; Posttranslational modification, protein turnover, chaperones	Biological Process: protein hydroxylation (GO:0018126);; Molecular Function: procollagen-proline dioxygenase activity (GO:0019798);; Molecular Function: vitamin binding (GO:0019842);; Cellular Component: intrinsic component of membrane (GO:0031224);; Biological Process: single-organism metabolic process (GO:0044710);; Molecular Function: transition metal ion binding (GO:0046914);;	K00472|0|cmo:103483779|probable prolyl 4-hydroxylase 4	Arginine and proline metabolism (ko00330)	[E]	Amino acid transport and metabolism	2OG-Fe(II) oxygenase superfamily;; 2OG-Fe(II) oxygenase superfamily;; ShK domain-like	sp|Q8LAN3|P4H4_ARATH Probable prolyl 4-hydroxylase 4 OS=Arabidopsis thaliana OX=3702 GN=P4H4 PE=2 SV=1	E	Amino acid transport and metabolism	PREDICTED: probable prolyl 4-hydroxylase 4 [Cucumis melo]
Cla97C03G056140	41082	72666	111525	33848	57525	46692	552.392	636.761	1101.82	341.981	449.675	419.76	0.00379133	-1.04038	down	[O]	Posttranslational modification, protein turnover, chaperones	Cellular Component: intracellular membrane-bounded organelle (GO:0043231);;	--	--	[OR]	Posttranslational modification, protein turnover, chaperones;; General function prediction only	Ubiquitin family;; Ubiquitin-2 like Rad60 SUMO-like;; Ubiquitin-like domain;; TANK binding kinase 1 ubiquitin-like domain;; Ubiquitin-2 like Rad60 SUMO-like;; DUF2407 ubiquitin-like domain;; Ubiquitin-like domain;; Toluene-4-monooxygenase system protein B (TmoB);; Domain of Unknown Function with PDB structure (DUF3861);; Cilia- and flagella-associated protein 298;; UDP-glucose:Glycoprotein Glucos…	sp|Q8H159|UBQ10_ARATH Polyubiquitin 10 OS=Arabidopsis thaliana OX=3702 GN=UBQ10 PE=2 SV=2	O	Posttranslational modification, protein turnover, chaperones	polyubiquitin-like [Helianthus annuus]
Cla97C11G212590	795	2569	2334	438	760	522	17.8518	37.6101	38.5239	7.38077	9.92644	7.83394	9.95e-08	-2.01393	down	--	--	Cellular Component: intrinsic component of membrane (GO:0031224);;	--	--	--	--	--	--	460		PREDICTED: uncharacterized protein LOC101213740 isoform X1 [Cucumis sativus]
Cla97C02G046130	5941	10947	8296	3367	3652	4061	141.965	170.493	145.662	60.4522	50.7372	64.8748	1.5e-12	-1.47621	down	[G]	Carbohydrate transport and metabolism	Biological Process: pyruvate metabolic process (GO:0006090);; Molecular Function: intramolecular oxidoreductase activity, interconverting aldoses and ketoses (GO:0016861);;	K01803|1.86518e-147|mcha:111017058|triosephosphate isomerase, cytosolic	Glycolysis / Gluconeogenesis (ko00010);; Fructose and mannose metabolism (ko00051);; Inositol phosphate metabolism (ko00562);; Carbon fixation in photosynthetic organisms (ko00710);; Carbon metabolism (ko01200);; Biosynthesis of amino acids (ko01230)	[G]	Carbohydrate transport and metabolism	Triosephosphate isomerase	sp|P48491|TPIS_ARATH Triosephosphate isomerase, cytosolic OS=Arabidopsis thaliana OX=3702 GN=CTIMC PE=1 SV=2	G	Carbohydrate transport and metabolism	triosephosphate isomerase, cytosolic [Momordica charantia]
Cla97C01G017890	382	590	1259	251	304	122	5.95363	5.99658	14.4453	2.94595	2.75963	1.26609	0.000153316	-2.05434	down	[V]	Defense mechanisms	Molecular Function: secondary active transmembrane transporter activity (GO:0015291);; Biological Process: drug transport (GO:0015893);; Cellular Component: intrinsic component of membrane (GO:0031224);;	K03327|0|cmo:103485342|protein DETOXIFICATION 27-like	--	[R]	General function prediction only	MatE	sp|Q9FKQ1|DTX27_ARATH Protein DETOXIFICATION 27 OS=Arabidopsis thaliana OX=3702 GN=DTX27 PE=2 SV=1	V	Defense mechanisms	PREDICTED: protein DETOXIFICATION 27-like [Cucumis melo]
Cla97C06G117370	2506	5197	5018	2407	2209	1704	17.2772	23.3473	25.4151	12.4681	8.85094	7.8505	2.7e-05	-1.28483	down	[HT]	Coenzyme transport and metabolism;; Signal transduction mechanisms	Biological Process: cellular protein modification process (GO:0006464);; Molecular Function: kinase activity (GO:0016301);; Molecular Function: purine ribonucleoside binding (GO:0032550);;	K08869|0|csv:101212546|uncharacterized protein LOC101212546	--	[R]	General function prediction only	ABC1 family;; Regulated-SNARE-like domain;; Synaptobrevin	sp|Q55680|Y005_SYNY3 Uncharacterized protein sll0005 OS=Synechocystis sp. (strain PCC 6803 / Kazusa) OX=1111708 GN=sll0005 PE=3 SV=1	EG	Amino acid transport and metabolism;; Carbohydrate transport and metabolism	hypothetical protein Csa_006715 [Cucumis sativus]
Cla97C09G181410	28674	62360	143960	592	707	969	296.984	420.924	1095.57	4.60395	4.25506	6.70707	1.46e-36	-6.98684	down	[O]	Posttranslational modification, protein turnover, chaperones	Molecular Function: purine ribonucleoside binding (GO:0032550);;	K03283|0|cmo:103498170|heat shock cognate 70 kDa protein 2-like	Spliceosome (ko03040);; Protein processing in endoplasmic reticulum (ko04141);; Endocytosis (ko04144)	[O]	Posttranslational modification, protein turnover, chaperones	Hsp70 protein;; MreB/Mbl protein	sp|P09189|HSP7C_PETHY Heat shock cognate 70 kDa protein OS=Petunia hybrida OX=4102 GN=HSP70 PE=2 SV=1	O	Posttranslational modification, protein turnover, chaperones	heat shock cognate 70 kDa protein 2-like [Cucumis melo var. makuwa]
Cla97C10G203460	251	254	283	156	213	136	2.88659	1.90006	2.39246	1.34675	1.42062	1.04712	0.00128148	-1.02026	down	--	--	--	--	--	--	--	NPH3 family;; BTB/POZ domain	sp|Q9LYW0|Y5325_ARATH BTB/POZ domain-containing protein At5g03250 OS=Arabidopsis thaliana OX=3702 GN=At5g03250 PE=2 SV=1	S	Function unknown	PREDICTED: BTB/POZ domain-containing protein At5g03250 [Cucumis sativus]
Cla97C10G200240	3262	5257	5343	2661	3276	2690	138.718	145.727	166.975	85.0323	81.0134	76.4881	1.47e-07	-1.00414	down	--	--	Cellular Component: mitochondrion (GO:0005739);; Cellular Component: plastid (GO:0009536);; Cellular Component: intrinsic component of membrane (GO:0031224);;	K17790|1.39353e-99|cmax:111470193|outer envelope pore protein 16-3, chloroplastic/mitochondrial-like	--	[U]	Intracellular trafficking, secretion, and vesicular transport	Tim17/Tim22/Tim23/Pmp24 family	sp|O48528|OP163_ARATH Outer envelope pore protein 16-3, chloroplastic/mitochondrial OS=Arabidopsis thaliana OX=3702 GN=OEP163 PE=1 SV=1	U	Intracellular trafficking, secretion, and vesicular transport	outer envelope pore protein 16-3, chloroplastic/mitochondrial-like [Cucurbita maxima]
Cla97C03G054650	14801	24641	25518	6551	8683	6487	296.152	321.325	375.167	98.4923	101.008	86.7845	2.6e-21	-1.90396	down	[G]	Carbohydrate transport and metabolism	Molecular Function: nucleotide binding (GO:0000166);; Molecular Function: oxidoreductase activity, acting on the aldehyde or oxo group of donors (GO:0016903);; Biological Process: hexose metabolic process (GO:0019318);;	K00134|0|cmo:103484230|glyceraldehyde-3-phosphate dehydrogenase 2, cytosolic	Glycolysis / Gluconeogenesis (ko00010);; Carbon fixation in photosynthetic organisms (ko00710);; Carbon metabolism (ko01200);; Biosynthesis of amino acids (ko01230)	[G]	Carbohydrate transport and metabolism	Glyceraldehyde 3-phosphate dehydrogenase, C-terminal domain;; Glyceraldehyde 3-phosphate dehydrogenase, NAD binding domain	sp|Q7FAH2|G3PC2_ORYSJ Glyceraldehyde-3-phosphate dehydrogenase 2, cytosolic OS=Oryza sativa subsp. japonica OX=39947 GN=GAPC2 PE=1 SV=1	G	Carbohydrate transport and metabolism	PREDICTED: glyceraldehyde-3-phosphate dehydrogenase 2, cytosolic [Cucumis melo]
Cla97C02G049340	2385	2345	382	348	508	652	28.2434	18.0961	3.32296	3.09158	3.49448	5.16035	0.00164234	-2.15456	down	[G]	Carbohydrate transport and metabolism	Biological Process: metal ion transport (GO:0030001);; Cellular Component: intrinsic component of membrane (GO:0031224);;	--	--	--	--	Sodium:sulfate symporter transmembrane region;; Citrate transporter	sp|Q9LXV3|DIT1_ARATH Dicarboxylate transporter 1, chloroplastic OS=Arabidopsis thaliana OX=3702 GN=DIT1 PE=1 SV=1	P	Inorganic ion transport and metabolism	dicarboxylate transporter 1, chloroplastic-like [Cucurbita maxima]
Cla97C10G204020	318	1677	5485	57	133	325	3.35222	11.5472	42.5861	0.446697	0.811391	2.28959	6.93e-06	-4.13898	down	--	--	Biological Process: vesicle-mediated transport (GO:0016192);; Cellular Component: protein complex (GO:0043234);;	K07195|0|cmo:103486419|exocyst complex component EXO70B1-like	--	[U]	Intracellular trafficking, secretion, and vesicular transport	Exo70 exocyst complex subunit	sp|Q8VY27|E70H1_ARATH Exocyst complex component EXO70H1 OS=Arabidopsis thaliana OX=3702 GN=EXO70H1 PE=1 SV=1	U	Intracellular trafficking, secretion, and vesicular transport	PREDICTED: exocyst complex component EXO70B1-like [Cucumis melo]
Cla97C07G140110	889	2003	727	309	872	705	4.03259	5.9187	2.42151	1.05012	2.29732	2.13667	0.00484773	-1.26417	down	[T]	Signal transduction mechanisms	Molecular Function: nucleoside-triphosphatase activity (GO:0017111);; Cellular Component: intrinsic component of membrane (GO:0031224);; Molecular Function: purine ribonucleoside binding (GO:0032550);; Biological Process: establishment of localization (GO:0051234);;	--	--	[Q]	Secondary metabolites biosynthesis, transport and catabolism	ABC-2 type transporter;; ABC transporter;; Plant PDR ABC transporter associated;; ABC-2 type transporter;; ABC-transporter N-terminal;; AAA domain, putative AbiEii toxin, Type IV TA system;; ATPase family associated with various cellular activities (AAA)	sp|Q9XIE2|AB36G_ARATH ABC transporter G family member 36 OS=Arabidopsis thaliana OX=3702 GN=ABCG36 PE=1 SV=1	Q	Secondary metabolites biosynthesis, transport and catabolism	PREDICTED: ABC transporter G family member 29-like [Cucumis melo]
Cla97C11G215770	497	733	703	194	636	267	5.23196	5.02629	5.43574	1.53123	3.89512	1.87985	0.00265978	-1.22512	down	[K]	Transcription	Biological Process: cellular protein modification process (GO:0006464);; Molecular Function: kinase activity (GO:0016301);; Cellular Component: intrinsic component of membrane (GO:0031224);; Molecular Function: purine ribonucleoside binding (GO:0032550);;	--	--	--	--	Protein kinase domain;; Protein tyrosine and serine/threonine kinase;; Leucine rich repeat;; Leucine rich repeat N-terminal domain;; Leucine Rich repeats (2 copies)	sp|Q9ZU46|ZAR1_ARATH Receptor protein kinase-like protein ZAR1 OS=Arabidopsis thaliana OX=3702 GN=ZAR1 PE=1 SV=1	T	Signal transduction mechanisms	PREDICTED: probable inactive leucine-rich repeat receptor-like protein kinase At1g66830 [Cucumis melo]
Cla97C03G056310	734	1776	1622	457	920	999	21.0993	33.2981	34.2813	9.86557	15.377	19.2122	0.00321172	-1.10119	down	--	--	Molecular Function: protein binding (GO:0005515);;	--	--	--	--	Helix-loop-helix DNA-binding domain	sp|Q9FH37|ILR3_ARATH Transcription factor ILR3 OS=Arabidopsis thaliana OX=3702 GN=ILR3 PE=1 SV=1	K	Transcription	PREDICTED: transcription factor ILR3-like [Cucumis sativus]
Cla97C06G123020	60	67	119	25	42	22	1.92846	1.40115	2.84072	0.589167	0.777584	0.473216	0.00055869	-1.84517	down	--	--	Molecular Function: endopeptidase activity (GO:0004175);; Biological Process: protein metabolic process (GO:0019538);;	--	--	[O]	Posttranslational modification, protein turnover, chaperones	Xylanase inhibitor N-terminal;; Eukaryotic aspartyl protease	sp|Q3EBM5|ASPR1_ARATH Probable aspartic protease At2g35615 OS=Arabidopsis thaliana OX=3702 GN=At2g35615 PE=3 SV=1	O	Posttranslational modification, protein turnover, chaperones	PREDICTED: aspartic proteinase CDR1-like [Cucumis melo]
Cla97C08G159020	118	151	812	49	76	29	2.71674	2.26496	13.8159	0.84673	1.01461	0.439472	7.93e-05	-3.17387	down	[S]	Function unknown	Cellular Component: intrinsic component of membrane (GO:0031224);;	--	--	--	--	Uncharacterized protein family, UPF0114	--	S	Function unknown	UPF0114 domain-containing protein [Cucumis melo var. makuwa]
Cla97C11G212540	3427	15173	26480	3498	5003	5221	22.6291	65.311	128.503	17.3603	19.2094	23.0554	0.000932776	-1.9842	down	--	--	--	--	--	--	--	Probable zinc-ribbon domain	sp|Q9FHK4|EDR4_ARATH Protein ENHANCED DISEASE RESISTANCE 4 OS=Arabidopsis thaliana OX=3702 GN=EDR4 PE=1 SV=1	S	Function unknown	PREDICTED: uncharacterized protein LOC105435747 [Cucumis sativus]
Cla97C08G160100	171	259	135	81	173	57	1.85259	1.8267	1.06946	0.655067	1.08854	0.409715	0.00972137	-1.24387	down	--	--	--	--	--	--	--	QWRF family	sp|Q94AI1|QWRF2_ARATH QWRF motif-containing protein 2 OS=Arabidopsis thaliana OX=3702 GN=QWRF2 PE=2 SV=1	S	Function unknown	QWRF motif-containing protein 2-like [Cucurbita maxima]
Cla97C01G001870	19782	88340	58403	615	2040	1662	200.887	584.653	435.779	4.69135	12.0431	11.2796	2.73e-27	-5.55115	down	[O]	Posttranslational modification, protein turnover, chaperones	Molecular Function: purine ribonucleoside binding (GO:0032550);;	K09490|0|cmo:103482828|luminal-binding protein 5	Protein export (ko03060);; Protein processing in endoplasmic reticulum (ko04141)	[O]	Posttranslational modification, protein turnover, chaperones	Hsp70 protein;; MreB/Mbl protein;; NAD-specific glutamate dehydrogenase	sp|Q03685|BIP5_TOBAC Luminal-binding protein 5 OS=Nicotiana tabacum OX=4097 GN=BIP5 PE=2 SV=1	O	Posttranslational modification, protein turnover, chaperones	PREDICTED: luminal-binding protein 5 [Cucumis melo]
Cla97C11G210220	1285	1564	903	604	984	780	13.1039	10.3954	6.76218	4.62608	5.83387	5.31851	0.000657109	-1.03629	down	--	--	Cellular Component: intrinsic component of membrane (GO:0031224);;	K17086|0|csv:101202996|transmembrane 9 superfamily member 11	--	[U]	Intracellular trafficking, secretion, and vesicular transport	Endomembrane protein 70	sp|Q9FYQ8|TMN11_ARATH Transmembrane 9 superfamily member 11 OS=Arabidopsis thaliana OX=3702 GN=TMN11 PE=2 SV=1	U	Intracellular trafficking, secretion, and vesicular transport	PREDICTED: transmembrane 9 superfamily member 11 [Cucumis sativus]
Cla97C06G119180	2621	4006	7343	1485	3141	2057	49.3751	49.18	101.638	21.0218	34.3959	25.9057	0.00057342	-1.42901	down	[E]	Amino acid transport and metabolism	Molecular Function: catalytic activity (GO:0003824);; Biological Process: carboxylic acid metabolic process (GO:0019752);;	K01620|0|cmo:103494316|probable low-specificity L-threonine aldolase 1	Glycine, serine and threonine metabolism (ko00260);; Biosynthesis of amino acids (ko01230)	[E]	Amino acid transport and metabolism	Beta-eliminating lyase	sp|Q8RXU4|THA1_ARATH Probable low-specificity L-threonine aldolase 1 OS=Arabidopsis thaliana OX=3702 GN=THA1 PE=1 SV=1	E	Amino acid transport and metabolism	PREDICTED: probable low-specificity L-threonine aldolase 1 isoform X1 [Cucumis melo]
Cla97C01G014620	379	439	781	53	396	62	7.09147	5.35445	10.7416	0.744627	4.30298	0.775547	0.00384571	-2.14603	down	--	--	Cellular Component: membrane (GO:0016020);;	--	--	--	--	EamA-like transporter family	sp|Q9FGG3|WTR45_ARATH WAT1-related protein At5g64700 OS=Arabidopsis thaliana OX=3702 GN=At5g64700 PE=2 SV=1	S	Function unknown	PREDICTED: WAT1-related protein At5g64700-like [Cucumis melo]
Cla97C03G062220	348	1401	834	147	592	215	14.2306	37.4115	25.0945	4.51764	14.0883	5.88336	0.00138773	-1.76406	down	--	--	--	--	--	--	--	Protein of unknown function, DUF538	--	S	Function unknown	PREDICTED: uncharacterized protein LOC103491951 [Cucumis melo]
Cla97C08G150740	607	1612	1375	765	811	531	10.4341	18.0735	17.3771	9.88143	8.10695	6.10632	0.00266709	-1.03625	down	[T]	Signal transduction mechanisms	Cellular Component: intrinsic component of membrane (GO:0031224);;	K14003|0|cmo:103496477|SEC12-like protein 1	Protein processing in endoplasmic reticulum (ko04141)	[U]	Intracellular trafficking, secretion, and vesicular transport	WD domain, G-beta repeat;; Anaphase-promoting complex subunit 4 WD40 domain	sp|Q8GYE0|PHF1_ARATH SEC12-like protein 1 OS=Arabidopsis thaliana OX=3702 GN=PHF1 PE=1 SV=2	U	Intracellular trafficking, secretion, and vesicular transport	PREDICTED: SEC12-like protein 1 [Cucumis melo]
Cla97C10G190050	2162	5311	5053	1249	2348	1311	71.6744	114.75	123.072	31.094	45.2532	29.0594	2.66e-07	-1.66999	down	[C]	Energy production and conversion	Molecular Function: catalytic activity (GO:0003824);; Biological Process: transcription, DNA-templated (GO:0006351);; Molecular Function: ribonucleotide binding (GO:0032553);; Biological Process: single-organism metabolic process (GO:0044710);;	K03809|2.0818e-126|cpep:111783843|NAD(P)H dehydrogenase (quinone) FQR1	Ubiquinone and other terpenoid-quinone biosynthesis (ko00130);; Biosynthesis of cofactors (ko01240)	[R]	General function prediction only	NADPH-dependent FMN reductase;; Flavodoxin-like fold	sp|Q6NQE2|FQRL1_ARATH Probable NAD(P)H dehydrogenase (quinone) FQR1-like 1 OS=Arabidopsis thaliana OX=3702 GN=At4g27270 PE=1 SV=1	S	Function unknown	NAD(P)H dehydrogenase (quinone) FQR1 [Cucurbita moschata]
Cla97C09G168130	93	156	344	16	25	3	4.03888	4.42025	11.0224	0.512365	0.623882	0.071574	2.47e-07	-4.11221	down	--	--	--	--	--	--	--	Protein of unknown function, DUF538	--	S	Function unknown	PREDICTED: uncharacterized protein LOC103492802 [Cucumis melo]
Cla97C05G091050	1364	3817	2694	1237	1797	1335	23.5309	42.9164	34.1422	16.0254	18.021	15.3952	7.03e-05	-1.12769	down	--	--	Biological Process: ion transport (GO:0006811);; Molecular Function: ion transmembrane transporter activity (GO:0015075);; Cellular Component: intrinsic component of membrane (GO:0031224);;	K05391|0|csv:101214670|cyclic nucleotide-gated ion channel 1 isoform X1	Plant-pathogen interaction (ko04626)	[PT]	Inorganic ion transport and metabolism;; Signal transduction mechanisms	Ion transport protein	sp|O65717|CNGC1_ARATH Cyclic nucleotide-gated ion channel 1 OS=Arabidopsis thaliana OX=3702 GN=CNGC1 PE=1 SV=1	PT	Inorganic ion transport and metabolism;; Signal transduction mechanisms	PREDICTED: cyclic nucleotide-gated ion channel 1-like isoform X1 [Cucumis sativus]
Cla97C09G171900	1999	2911	3097	1456	1377	1340	73.8626	70.1027	84.077	40.4109	29.5848	33.0889	3.83e-07	-1.24992	down	--	--	--	--	--	--	--	--	sp|Q8LDV3|Y4320_ARATH Uncharacterized protein At4g13200, chloroplastic OS=Arabidopsis thaliana OX=3702 GN=At4g13200 PE=1 SV=2	S	Function unknown	PREDICTED: uncharacterized protein At4g13200, chloroplastic [Cucumis sativus]
Cla97C01G022240	779	1191	1714	459	903	401	6.1201	6.10165	9.90204	2.70882	4.1254	2.1055	0.000185505	-1.43404	down	[NW]	Cell motility;; Extracellular structures	--	--	--	--	--	Protein tyrosine and serine/threonine kinase;; Protein kinase domain;; D-mannose binding lectin;; S-locus glycoprotein domain;; PAN-like domain;; Domain of unknown function (DUF3403)	sp|O81906|B120_ARATH G-type lectin S-receptor-like serine/threonine-protein kinase B120 OS=Arabidopsis thaliana OX=3702 GN=B120 PE=2 SV=1	T	Signal transduction mechanisms	PREDICTED: G-type lectin S-receptor-like serine/threonine-protein kinase B120 isoform X1 [Cucumis melo]
Cla97C01G008690	182	297	233	54	171	48	16.135	17.1995	15.1817	3.54678	8.80707	2.83661	0.000394885	-1.78724	down	--	--	--	--	--	--	--	--	--	--	--	hypothetical protein Csa_015192 [Cucumis sativus]
Cla97C09G170080	703	1064	1550	135	601	124	4.69308	4.62745	7.60119	0.67671	2.33099	0.549872	6.81e-05	-2.3924	down	[P]	Inorganic ion transport and metabolism	Biological Process: calcium ion transport (GO:0006816);; Molecular Function: cation-transporting ATPase activity (GO:0019829);; Cellular Component: intrinsic component of membrane (GO:0031224);; Molecular Function: purine ribonucleoside binding (GO:0032550);; Molecular Function: cation binding (GO:0043169);;	K01537|0|csv:101220140|calcium-transporting ATPase 12, plasma membrane-type	--	[P]	Inorganic ion transport and metabolism	Cation transporting ATPase, C-terminus;; E1-E2 ATPase;; haloacid dehalogenase-like hydrolase;; Cation transport ATPase (P-type);; Cation transporter/ATPase, N-terminus	sp|Q9LY77|ACA12_ARATH Calcium-transporting ATPase 12, plasma membrane-type OS=Arabidopsis thaliana OX=3702 GN=ACA12 PE=2 SV=1	P	Inorganic ion transport and metabolism	PREDICTED: calcium-transporting ATPase 12, plasma membrane-type [Cucumis sativus]
Cla97C05G097890	2196	4323	5973	1554	1355	1809	18.9623	24.3308	37.9073	10.0823	6.80132	10.4472	1.55e-05	-1.67936	down	--	--	--	--	--	--	--	--	--	958		myosin-11 [Cucurbita maxima]
Cla97C05G085860	3027	5030	21234	958	1496	1714	43.7457	47.3718	225.465	10.3957	12.5672	16.5562	4.44e-06	-3.14095	down	[P]	Inorganic ion transport and metabolism	Molecular Function: sulfate adenylyltransferase activity (GO:0004779);; Biological Process: sulfur compound metabolic process (GO:0006790);;	K13811|0|cmo:103483665|ATP sulfurylase 1, chloroplastic	Purine metabolism (ko00230);; Monobactam biosynthesis (ko00261);; Selenocompound metabolism (ko00450);; Sulfur metabolism (ko00920)	[P]	Inorganic ion transport and metabolism	ATP-sulfurylase;; PUA-like domain	sp|Q9LIK9|APS1_ARATH ATP sulfurylase 1, chloroplastic OS=Arabidopsis thaliana OX=3702 GN=APS1 PE=1 SV=1	P	Inorganic ion transport and metabolism	PREDICTED: ATP sulfurylase 1, chloroplastic [Cucumis melo]
Cla97C01G009730	2507	4577	5262	2183	3115	2048	71.2266	84.7609	109.856	46.6019	51.4616	38.91	8.05e-05	-1.07218	down	[O]	Posttranslational modification, protein turnover, chaperones	Molecular Function: endopeptidase activity (GO:0004175);; Cellular Component: proteasome core complex (GO:0005839);; Biological Process: modification-dependent protein catabolic process (GO:0019941);; Cellular Component: intracellular membrane-bounded organelle (GO:0043231);;	K02729|6.59088e-174|cpep:111783669|proteasome subunit alpha type-5	Proteasome (ko03050)	[O]	Posttranslational modification, protein turnover, chaperones	Proteasome subunit;; Proteasome subunit A N-terminal signature	sp|Q9M4T8|PSA5_SOYBN Proteasome subunit alpha type-5 OS=Glycine max OX=3847 GN=PAE1 PE=2 SV=1	O	Posttranslational modification, protein turnover, chaperones	proteasome subunit alpha type-5 [Cucurbita moschata]
Cla97C10G194650	1311	2962	2935	1111	1695	1422	24.4201	35.9566	40.167	15.5417	18.356	17.7087	0.000129551	-1.07194	down	[M]	Cell wall/membrane/envelope biogenesis	Molecular Function: protein kinase activity (GO:0004672);; Biological Process: cellular protein modification process (GO:0006464);; Molecular Function: purine ribonucleoside binding (GO:0032550);;	K13436|0|csv:101223136|pto-interacting protein 1	Plant-pathogen interaction (ko04626)	[T]	Signal transduction mechanisms	Protein tyrosine and serine/threonine kinase;; Protein kinase domain	sp|Q41328|PTI1_SOLLC Pto-interacting protein 1 OS=Solanum lycopersicum OX=4081 GN=PTI1 PE=1 SV=2	T	Signal transduction mechanisms	PREDICTED: pto-interacting protein 1-like [Cucumis sativus]
Cla97C05G094420	238	410	493	121	228	130	15.2721	17.198	23.3281	5.84718	8.5189	5.55934	3.22e-06	-1.60167	down	--	--	--	--	--	--	--	--	--	--	--	uncharacterized protein LOC111441775 [Cucurbita moschata]
Cla97C02G029390	1179	3268	4016	1063	1615	1119	18.2327	32.9588	45.6617	12.3548	14.5307	11.5696	0.000253928	-1.45137	down	--	--	Cellular Component: Golgi apparatus (GO:0005794);; Molecular Function: acetylglucosaminyltransferase activity (GO:0008375);; Biological Process: oligosaccharide metabolic process (GO:0009311);; Cellular Component: intrinsic component of membrane (GO:0031224);;	K00736|0|cmo:103500510|alpha-1,6-mannosyl-glycoprotein 2-beta-N-acetylglucosaminyltransferase	N-Glycan biosynthesis (ko00510);; Various types of N-glycan biosynthesis (ko00513)	[G]	Carbohydrate transport and metabolism	N-acetylglucosaminyltransferase II (MGAT2)	sp|Q9FT88|MGAT2_ARATH Alpha-1,6-mannosyl-glycoprotein 2-beta-N-acetylglucosaminyltransferase OS=Arabidopsis thaliana OX=3702 GN=GNT2 PE=1 SV=1	G	Carbohydrate transport and metabolism	PREDICTED: alpha-1,6-mannosyl-glycoprotein 2-beta-N-acetylglucosaminyltransferase [Cucumis melo]
Cla97C06G127200	416	994	1673	162	355	209	4.92547	7.6837	14.582	1.43554	2.44489	1.65379	9.72e-07	-2.4245	down	[S]	Function unknown	Cellular Component: intrinsic component of membrane (GO:0031224);;	--	--	--	--	Glyoxal oxidase N-terminus;; Domain of unknown function (DUF1929)	sp|Q3HRQ2|GLOX_VITPS Aldehyde oxidase GLOX OS=Vitis pseudoreticulata OX=231512 GN=GLOX PE=2 SV=1	S	Function unknown	WSC domain-containing protein [Cucumis melo var. makuwa]
Cla97C02G044720	90	154	243	76	90	57	5.97061	6.6859	11.9158	3.77716	3.49548	2.55172	0.00201062	-1.44553	down	--	--	Molecular Function: transition metal ion binding (GO:0046914);;	K16280|1.85414e-37|cmo:103496272|E3 ubiquitin-protein ligase RGLG2	--	[T]	Signal transduction mechanisms	--	sp|Q9SAL0|RGLG4_ARATH E3 ubiquitin-protein ligase RGLG4 OS=Arabidopsis thaliana OX=3702 GN=RGLG4 PE=1 SV=1	O	Posttranslational modification, protein turnover, chaperones	E3 ubiquitin-protein ligase RGLG2 [Cucumis melo var. makuwa]
Cla97C01G024530	1146	3199	3045	1183	1602	1188	12.2056	22.1988	23.829	9.46608	9.91639	8.45765	0.000393388	-1.175	down	--	--	Cellular Component: Golgi apparatus (GO:0005794);; Biological Process: metabolic process (GO:0008152);; Molecular Function: mannosyl-oligosaccharide mannosidase activity (GO:0015924);; Cellular Component: intrinsic component of membrane (GO:0031224);; Molecular Function: metal ion binding (GO:0046872);;	K23741|0|cmo:103484372|mannosyl-oligosaccharide 1,2-alpha-mannosidase MNS3	N-Glycan biosynthesis (ko00510);; Various types of N-glycan biosynthesis (ko00513);; Protein processing in endoplasmic reticulum (ko04141)	[G]	Carbohydrate transport and metabolism	Glycosyl hydrolase family 47	sp|Q93Y37|MNS3_ARATH Mannosyl-oligosaccharide 1,2-alpha-mannosidase MNS3 OS=Arabidopsis thaliana OX=3702 GN=MNS3 PE=1 SV=1	G	Carbohydrate transport and metabolism	PREDICTED: mannosyl-oligosaccharide 1,2-alpha-mannosidase MNS3 [Cucumis melo]
Cla97C02G037460	2903	5543	11515	2106	3772	3714	44.7163	55.649	130.343	24.3707	33.779	38.2526	0.00487005	-1.38556	down	--	--	--	K19366|0|csv:101218079|protein EARLY-RESPONSIVE TO DEHYDRATION 7, chloroplastic	Endocytosis (ko04144)	--	--	Senescence-associated protein	sp|O48832|ERD7_ARATH Protein EARLY-RESPONSIVE TO DEHYDRATION 7, chloroplastic OS=Arabidopsis thaliana OX=3702 GN=ERD7 PE=1 SV=1	S	Function unknown	PREDICTED: uncharacterized protein LOC101218079 [Cucumis sativus]
Cla97C06G125510	427	789	1508	228	269	205	24.663	29.6885	64.0132	9.87234	9.01095	7.89096	1.07e-06	-2.26621	down	--	--	Cellular Component: mitochondrial inner membrane (GO:0005743);; Biological Process: protein targeting to mitochondrion (GO:0006626);;	K17805|1.87633e-76|csv:101219160|mitochondrial import inner membrane translocase subunit PAM16 like 2	--	[S]	Function unknown	Pam16	sp|Q93VV9|TM16B_ARATH Mitochondrial import inner membrane translocase subunit PAM16 like 2 OS=Arabidopsis thaliana OX=3702 GN=PAM16L2 PE=2 SV=1	S	Function unknown	PREDICTED: mitochondrial import inner membrane translocase subunit tim16 [Cucumis sativus]
Cla97C04G079430	372	603	812	302	444	296	18.3162	19.3734	29.4234	11.1832	12.7269	9.74212	0.000555756	-1.11427	down	--	--	--	--	--	--	--	--	--	53		Ankyrin repeat domain-containing protein 50 isoform 1 [Cucumis melo var. makuwa]
Cla97C01G010600	769	1201	1439	626	892	568	28.2501	28.7535	38.8499	17.2713	19.0421	13.9569	0.000114509	-1.04664	down	--	--	Cellular Component: intrinsic component of membrane (GO:0031224);; Cellular Component: Golgi apparatus part (GO:0044431);;	--	--	[R]	General function prediction only	Eukaryotic protein of unknown function (DUF846)	sp|Q8LEK2|TVP23_ARATH Golgi apparatus membrane protein-like protein ECHIDNA OS=Arabidopsis thaliana OX=3702 GN=ECH PE=1 SV=1	S	Function unknown	PREDICTED: Golgi apparatus membrane protein-like protein ECHIDNA [Cucumis sativus]
Cla97C09G174840	200	854	1025	120	130	141	9.50855	26.4967	35.8523	4.28019	3.5859	4.48316	7.92e-07	-2.65034	down	--	--	Biological Process: response to hormone (GO:0009725);;	--	--	--	--	--	--	180		PREDICTED: uncharacterized protein LOC103503536 [Cucumis melo]
Cla97C10G204190	54	261	342	7	78	19	4.49395	14.1918	20.9389	0.436686	3.75954	1.05774	0.000635542	-3.05423	down	--	--	--	--	--	--	--	--	--	--	--	hypothetical protein Csa_002334 [Cucumis sativus]
Cla97C10G191480	814	7452	8211	522	744	607	7.65016	45.6785	56.7486	3.68509	4.0686	3.81672	2.72e-07	-3.3658	down	[HI]	Coenzyme transport and metabolism;; Lipid transport and metabolism	Biological Process: terpenoid metabolic process (GO:0006721);; Molecular Function: transferase activity, transferring aldehyde or ketonic groups (GO:0016744);;	K01662|0|cmo:103491851|probable 1-deoxy-D-xylulose-5-phosphate synthase 2, chloroplastic	Thiamine metabolism (ko00730);; Terpenoid backbone biosynthesis (ko00900)	[G]	Carbohydrate transport and metabolism	1-deoxy-D-xylulose-5-phosphate synthase;; Transketolase, pyrimidine binding domain;; Transketolase, C-terminal domain;; Dehydrogenase E1 component;; Thiamine pyrophosphate enzyme, C-terminal TPP binding domain	sp|Q6YU51|DXS2_ORYSJ Probable 1-deoxy-D-xylulose-5-phosphate synthase 2, chloroplastic OS=Oryza sativa subsp. japonica OX=39947 GN=Os07g0190000 PE=2 SV=1	G	Carbohydrate transport and metabolism	PREDICTED: probable 1-deoxy-D-xylulose-5-phosphate synthase 2, chloroplastic [Cucumis melo]
Cla97C05G094810	1475	6029	11011	420	1533	651	22.1168	58.9151	121.318	4.73245	13.3641	6.52456	1.48e-06	-3.18418	down	--	--	Cellular Component: intrinsic component of membrane (GO:0031224);;	--	--	[E]	Amino acid transport and metabolism	Transmembrane amino acid transporter protein;; Tryptophan/tyrosine permease family	sp|Q9FKS8|LHT1_ARATH Lysine histidine transporter 1 OS=Arabidopsis thaliana OX=3702 GN=LHT1 PE=1 SV=1	E	Amino acid transport and metabolism	PREDICTED: lysine histidine transporter 2 isoform X1 [Cucumis sativus]
Cla97C03G053880	106	152	171	11	103	30	4.44248	4.16567	5.29746	0.335367	2.51892	0.843719	0.00557717	-2.03879	down	--	--	Cellular Component: extracellular region (GO:0005576);; Biological Process: cellular glucan metabolic process (GO:0006073);; Molecular Function: transferase activity (GO:0016740);; Molecular Function: hydrolase activity, acting on glycosyl bonds (GO:0016798);; Biological Process: cellular component organization or biogenesis (GO:0071840);;	K08235|4.52839e-93|cpep:111783231|probable xyloglucan endotransglucosylase/hydrolase protein 32 isoform X1	--	--	--	Glycosyl hydrolases family 16;; Xyloglucan endo-transglycosylase (XET) C-terminus	sp|Q9SJL9|XTH32_ARATH Probable xyloglucan endotransglucosylase/hydrolase protein 32 OS=Arabidopsis thaliana OX=3702 GN=XTH32 PE=2 SV=1	G	Carbohydrate transport and metabolism	probable xyloglucan endotransglucosylase/hydrolase protein 32 isoform X1 [Cucurbita pepo subsp. pepo]
Cla97C09G171850	3863	6113	13590	872	1306	990	97.1267	100.151	251.059	16.4719	19.0869	16.6385	2.21e-12	-3.23229	down	--	--	Molecular Function: hydrolase activity, hydrolyzing O-glycosyl compounds (GO:0004553);; Cellular Component: intracellular membrane-bounded organelle (GO:0043231);;	K22762|7.64522e-158|csv:101204121|desumoylating isopeptidase 1	--	[S]	Function unknown	PPPDE putative peptidase domain	sp|Q6GLM5|DESI1_XENLA Desumoylating isopeptidase 1 OS=Xenopus laevis OX=8355 GN=desi1 PE=2 SV=1	S	Function unknown	PREDICTED: desumoylating isopeptidase 1 [Cucumis sativus]
Cla97C10G202380	4940	11120	23993	4649	6320	4419	93.0675	136.529	332.116	65.8054	69.2111	55.6517	0.00102942	-1.69046	down	[G]	Carbohydrate transport and metabolism	Biological Process: pyruvate metabolic process (GO:0006090);; Molecular Function: aldehyde-lyase activity (GO:0016832);;	K01623|0|csv:101209429|fructose-bisphosphate aldolase 6, cytosolic	Glycolysis / Gluconeogenesis (ko00010);; Pentose phosphate pathway (ko00030);; Fructose and mannose metabolism (ko00051);; Carbon fixation in photosynthetic organisms (ko00710);; Carbon metabolism (ko01200);; Biosynthesis of amino acids (ko01230)	[G]	Carbohydrate transport and metabolism	Fructose-bisphosphate aldolase class-I	sp|Q9SJQ9|ALFC6_ARATH Fructose-bisphosphate aldolase 6, cytosolic OS=Arabidopsis thaliana OX=3702 GN=FBA6 PE=1 SV=1	G	Carbohydrate transport and metabolism	PREDICTED: fructose-bisphosphate aldolase cytoplasmic isozyme isoform X2 [Cucumis melo]
Cla97C05G085230	152	585	1645	116	156	82	6.68685	16.8378	53.423	3.85023	3.99168	2.39578	3.82e-05	-3.04873	down	--	--	Cellular Component: intrinsic component of membrane (GO:0031224);;	--	--	--	--	Domain of unknown function (DUF588)	sp|Q8L7R5|CSPLG_ARATH CASP-like protein 5B3 OS=Arabidopsis thaliana OX=3702 GN=At3g23200 PE=2 SV=1	S	Function unknown	PREDICTED: CASP-like protein 5B3 [Cucumis sativus]
Cla97C01G009410	433	854	826	184	397	280	6.53591	8.3955	9.15337	2.07845	3.48043	2.82047	1.15e-07	-1.63355	down	--	--	Cellular Component: intrinsic component of membrane (GO:0031224);;	--	--	--	--	GDP-fucose protein O-fucosyltransferase	sp|Q9MA87|OFT23_ARATH O-fucosyltransferase 23 OS=Arabidopsis thaliana OX=3702 GN=OFUT23 PE=2 SV=1	G	Carbohydrate transport and metabolism	PREDICTED: uncharacterized protein LOC103498309 [Cucumis melo]
Cla97C05G081710	1722	7011	13683	1834	2602	2773	24.9809	66.3105	145.916	19.9921	21.9487	26.9057	0.00184288	-1.91097	down	[G]	Carbohydrate transport and metabolism	Molecular Function: transferase activity, transferring glycosyl groups (GO:0016757);;	--	--	[GC]	Carbohydrate transport and metabolism;; Energy production and conversion	UDP-glucoronosyl and UDP-glucosyl transferase	sp|Q66PF2|URT1_FRAAN Putative UDP-rhamnose:rhamnosyltransferase 1 OS=Fragaria ananassa OX=3747 GN=GT4 PE=2 SV=1	CG	Energy production and conversion;; Carbohydrate transport and metabolism	PREDICTED: UDP-glycosyltransferase 91A1-like [Cucumis melo]
Cla97C02G034890	8360	25278	27210	6621	9554	7176	111.302	219.326	266.173	66.2372	73.9436	63.8735	9.96e-06	-1.66239	down	[QV]	Secondary metabolites biosynthesis, transport and catabolism;; Defense mechanisms	Molecular Function: oxidoreductase activity (GO:0016491);; Cellular Component: intrinsic component of membrane (GO:0031224);; Biological Process: single-organism metabolic process (GO:0044710);; Molecular Function: tetrapyrrole binding (GO:0046906);; Molecular Function: transition metal ion binding (GO:0046914);;	--	--	[Q]	Secondary metabolites biosynthesis, transport and catabolism	Cytochrome P450	sp|W8JMU7|CYQ32_CATRO Cytochrome P450 81Q32 OS=Catharanthus roseus OX=4058 GN=CYP81Q32 PE=2 SV=1	Q	Secondary metabolites biosynthesis, transport and catabolism	PREDICTED: cytochrome P450 81D1-like [Cucumis sativus]
Cla97C10G196250	751	2836	4243	519	1192	659	10.916	26.8792	45.3406	5.6629	10.0783	6.40219	0.000216997	-2.03979	down	--	--	Cellular Component: intrinsic component of membrane (GO:0031224);;	--	--	[GMW]	Carbohydrate transport and metabolism;; Cell wall/membrane/envelope biogenesis;; Extracellular structures	Exostosin family	sp|Q9FFN2|GLYT3_ARATH Probable glycosyltransferase At5g03795 OS=Arabidopsis thaliana OX=3702 GN=At5g03795 PE=3 SV=2	GMW	Carbohydrate transport and metabolism;; Cell wall/membrane/envelope biogenesis;; Extracellular structures	PREDICTED: probable glycosyltransferase At5g03795 [Cucumis sativus]
Cla97C01G001420	380	740	834	150	373	124	23.7782	30.1828	38.337	7.01866	13.5623	5.18133	1.07e-05	-1.96597	down	--	--	--	--	--	--	--	--	--	62		uncharacterized protein E5676_scaffold376G001410 [Cucumis melo var. makuwa]
Cla97C09G165830	123	79	70	12	52	12	5.57714	2.34006	2.32604	0.385565	1.37504	0.336442	0.00163904	-2.37204	down	[IQ]	Lipid transport and metabolism;; Secondary metabolites biosynthesis, transport and catabolism	--	K01904|8.78036e-81|csv:101218121|4-coumarate--CoA ligase 2	Ubiquinone and other terpenoid-quinone biosynthesis (ko00130);; Phenylpropanoid biosynthesis (ko00940)	[I]	Lipid transport and metabolism	AMP-binding enzyme C-terminal domain;; AMP-binding enzyme	sp|O24146|4CL2_TOBAC 4-coumarate--CoA ligase 2 OS=Nicotiana tabacum OX=4097 GN=4CL2 PE=1 SV=1	I	Lipid transport and metabolism	4-coumarate--CoA ligase 1-like [Cucumis melo var. makuwa]
Cla97C02G040800	430	1474	10419	40	187	51	3.82085	8.54758	68.1237	0.262211	0.964656	0.302523	3.13e-09	-5.88974	down	[C]	Energy production and conversion	Biological Process: hydrogen transport (GO:0006818);; Molecular Function: P-P-bond-hydrolysis-driven transmembrane transporter activity (GO:0015405);; Molecular Function: pyrophosphatase activity (GO:0016462);; Cellular Component: intrinsic component of membrane (GO:0031224);;	K23025|0|cmo:103494311|pyrophosphate-energized vacuolar membrane proton pump 1-like	--	--	--	Inorganic H+ pyrophosphatase	sp|P31414|AVP1_ARATH Pyrophosphate-energized vacuolar membrane proton pump 1 OS=Arabidopsis thaliana OX=3702 GN=AVP1 PE=1 SV=1	C	Energy production and conversion	PREDICTED: pyrophosphate-energized vacuolar membrane proton pump 1-like [Cucumis melo]
Cla97C04G071310	839	1388	1349	505	643	459	32.6033	35.15	38.5191	14.744	14.5163	11.9196	2.13e-12	-1.47633	down	--	--	Molecular Function: protein binding (GO:0005515);;	--	--	--	--	--	--	S	Function unknown	uncharacterized protein LOC111803362 [Cucurbita pepo subsp. pepo]
Cla97C03G056230	1059	2026	3419	237	1030	413	10.8306	13.5033	25.7007	1.81921	6.1257	2.82011	2.24e-05	-2.35709	down	[T]	Signal transduction mechanisms	Molecular Function: protein kinase activity (GO:0004672);; Cellular Component: membrane (GO:0016020);;	--	--	--	--	Protein tyrosine and serine/threonine kinase;; Protein kinase domain;; Salt stress response/antifungal	sp|Q9M0X5|CRK25_ARATH Cysteine-rich receptor-like protein kinase 25 OS=Arabidopsis thaliana OX=3702 GN=CRK25 PE=3 SV=1	T	Signal transduction mechanisms	PREDICTED: cysteine-rich receptor-like protein kinase 10 [Cucumis melo]
Cla97C01G012510	1083	3069	2728	665	1326	721	11.9422	22.067	22.1149	5.51041	8.5025	5.31792	4.5e-06	-1.65321	down	--	--	--	--	--	--	--	Armadillo/beta-catenin-like repeat;; HEAT repeats	--	1103		PREDICTED: uncharacterized protein LOC103483785 [Cucumis melo]
Cla97C01G006550	679	1577	2076	295	596	264	46.8566	70.915	105.245	15.2941	23.9098	12.1382	2.07e-07	-2.24573	down	[O]	Posttranslational modification, protein turnover, chaperones	Biological Process: cellular process (GO:0009987);; Cellular Component: intracellular part (GO:0044424);;	K04078|9.53127e-58|cmo:103504560|10 kDa chaperonin-like	--	[O]	Posttranslational modification, protein turnover, chaperones	Chaperonin 10 Kd subunit	sp|P34893|CH10_ARATH 10 kDa chaperonin, mitochondrial OS=Arabidopsis thaliana OX=3702 GN=CPN10 PE=1 SV=1	O	Posttranslational modification, protein turnover, chaperones	PREDICTED: 10 kDa chaperonin-like [Cucumis melo]
Cla97C05G096790	50	469	711	28	107	25	0.802816	4.97873	8.50207	0.33791	1.00496	0.262966	0.000169115	-3.28316	down	[T]	Signal transduction mechanisms	Molecular Function: protein tyrosine kinase activity (GO:0004713);; Biological Process: protein phosphorylation (GO:0006468);; Molecular Function: purine ribonucleoside binding (GO:0032550);;	--	--	[T]	Signal transduction mechanisms	Protein kinase domain;; Protein tyrosine and serine/threonine kinase	sp|Q9ZUF4|RIPK_ARATH Serine/threonine-protein kinase RIPK OS=Arabidopsis thaliana OX=3702 GN=RIPK PE=1 SV=1	T	Signal transduction mechanisms	PREDICTED: putative receptor-like protein kinase At1g72540 [Cucumis melo]
Cla97C10G198140	861	2445	1843	478	716	558	5.13467	9.50142	8.07369	2.14048	2.47985	2.2224	1.07e-09	-1.83418	down	[K]	Transcription	--	--	--	--	--	TIR domain;; NB-ARC domain;; TIR domain;; Leucine rich repeat;; Leucine Rich repeats (2 copies);; NACHT domain	sp|V9M398|RUN1_VITRO Disease resistance protein RUN1 OS=Vitis rotundifolia OX=103349 GN=RUN1 PE=1 SV=1	T	Signal transduction mechanisms	PREDICTED: TMV resistance protein N [Cucumis melo]
Cla97C02G040220	3570	8018	11987	3875	5628	3621	60.8079	89.0205	150.043	49.598	55.7401	41.2413	0.00411385	-1.15647	down	--	--	Cellular Component: cytoplasm (GO:0005737);; Biological Process: protein transport (GO:0015031);; Cellular Component: membrane (GO:0016020);;	--	--	[U]	Intracellular trafficking, secretion, and vesicular transport	VHS domain;; GAT domain	sp|Q9LFL3|TOL1_ARATH TOM1-like protein 1 OS=Arabidopsis thaliana OX=3702 GN=TOL1 PE=1 SV=1	U	Intracellular trafficking, secretion, and vesicular transport	TOM1-like protein 1 [Cucurbita pepo subsp. pepo]
Cla97C05G107680	44	226	309	31	49	31	0.90582	3.05897	4.71932	0.480795	0.590651	0.423445	8.04e-05	-2.65453	down	--	--	Molecular Function: DNA binding (GO:0003677);; Biological Process: transcription, DNA-templated (GO:0006351);; Cellular Component: intracellular membrane-bounded organelle (GO:0043231);;	--	--	[K]	Transcription	KNOX2 domain;; KNOX1 domain;; Homeobox KN domain;; ELK domain;; Homeodomain	sp|Q84JS6|KNAT6_ARATH Homeobox protein knotted-1-like 6 OS=Arabidopsis thaliana OX=3702 GN=KNAT6 PE=1 SV=1	K	Transcription	PREDICTED: homeobox protein knotted-1-like 6 [Cucumis sativus]
Cla97C06G125260	715	1601	2377	675	971	711	46.0082	67.1884	112.479	32.6656	36.3559	30.5807	0.00125626	-1.30184	down	--	--	Cellular Component: intrinsic component of membrane (GO:0031224);;	--	--	[S]	Function unknown	Uncharacterised protein family (UPF0139)	sp|Q9SD88|ASTER_ARATH Protein Asterix OS=Arabidopsis thaliana OX=3702 GN=At5g07960 PE=3 SV=1	S	Function unknown	PREDICTED: protein Asterix [Cucumis melo]
Cla97C07G132500	3286	1564	169	171	533	460	75.8334	23.5167	2.86315	2.96431	7.14937	7.08797	0.00382839	-2.65896	down	[G]	Carbohydrate transport and metabolism	Cellular Component: intrinsic component of membrane (GO:0031224);; Biological Process: establishment of localization (GO:0051234);;	K09872|0|cmax:111491522|probable aquaporin PIP1-4	--	[G]	Carbohydrate transport and metabolism	Major intrinsic protein	sp|Q39196|PIP14_ARATH Probable aquaporin PIP1-4 OS=Arabidopsis thaliana OX=3702 GN=PIP1.4 PE=1 SV=1	P	Inorganic ion transport and metabolism	probable aquaporin PIP1-4 [Cucurbita maxima]
Cla97C01G020270	1070	2338	1378	677	1313	804	19.8117	28.2282	18.7536	9.42462	14.1415	9.95305	5.35e-05	-1.09813	down	[G]	Carbohydrate transport and metabolism	Molecular Function: hydrolase activity, hydrolyzing O-glycosyl compounds (GO:0004553);; Biological Process: aminoglycan catabolic process (GO:0006026);; Biological Process: cell wall macromolecule metabolic process (GO:0044036);; Biological Process: primary metabolic process (GO:0044238);; Molecular Function: carbohydrate derivative binding (GO:0097367);;	K20547|5.50418e-168|cmax:111477669|endochitinase-like	Amino sugar and nucleotide sugar metabolism (ko00520);; MAPK signaling pathway - plant (ko04016)	[R]	General function prediction only	Chitinase class I;; Chitin recognition protein	sp|P36907|CHIX_PEA Endochitinase OS=Pisum sativum OX=3888 PE=2 SV=1	S	Function unknown	family 19 chitinase [Cucumis melo var. makuwa]
Cla97C11G218550	1372	2163	3508	1012	1313	1072	35.1299	36.0996	66.0247	19.467	19.5416	18.3487	0.000114163	-1.37811	down	[R]	General function prediction only	--	--	--	[R]	General function prediction only	Tetratricopeptide repeat;; Tetratricopeptide repeat;; TPR repeat;; Tetratricopeptide repeat;; Tetratricopeptide repeat;; Tetratricopeptide repeat;; Tetratricopeptide repeat	sp|Q3ZBR5|TTC1_BOVIN Tetratricopeptide repeat protein 1 OS=Bos taurus OX=9913 GN=TTC1 PE=2 SV=1	S	Function unknown	tetratricopeptide repeat protein 1-like [Cucurbita pepo subsp. pepo]
Cla97C01G007630	257	618	2711	12	5	81	6.5564	10.2645	50.8369	0.229367	0.061528	1.36513	5.7e-07	-5.44087	down	[H]	Coenzyme transport and metabolism	Molecular Function: catalytic activity (GO:0003824);;	K18551|3.17551e-161|csv:101214354|LOW QUALITY PROTEIN: suppressor of disruption of TFIIS	Nicotinate and nicotinamide metabolism (ko00760)	[R]	General function prediction only	Haloacid dehalogenase-like hydrolase;; haloacid dehalogenase-like hydrolase	sp|Q09893|YAI5_SCHPO Uncharacterized protein C24B11.05 OS=Schizosaccharomyces pombe (strain 972 / ATCC 24843) OX=284812 GN=SPAC24B11.05 PE=3 SV=1	S	Function unknown	uncharacterized protein C24B11.05 isoform X1 [Momordica charantia]
Cla97C08G152170	2603	7406	13818	1971	3530	2545	50.1471	93.002	195.631	28.5242	39.5372	32.7812	0.000333823	-1.87898	down	[T]	Signal transduction mechanisms	Molecular Function: protein kinase activity (GO:0004672);; Biological Process: cellular protein modification process (GO:0006464);; Biological Process: phosphate-containing compound metabolic process (GO:0006796);; Molecular Function: purine ribonucleoside binding (GO:0032550);;	--	--	[T]	Signal transduction mechanisms	Protein tyrosine and serine/threonine kinase;; Protein kinase domain	sp|Q9SII6|PIX13_ARATH Probable serine/threonine-protein kinase PIX13 OS=Arabidopsis thaliana OX=3702 GN=PIX13 PE=1 SV=2	T	Signal transduction mechanisms	PREDICTED: probable serine/threonine-protein kinase NAK [Cucumis sativus]
Cla97C09G167530	1920	3578	5296	1316	1516	765	199.69	242.567	404.857	102.892	91.6873	53.1527	5.63e-06	-1.89667	down	--	--	Cellular Component: mitochondrial inner membrane (GO:0005743);; Cellular Component: intrinsic component of membrane (GO:0031224);;	--	--	--	--	--	sp|Q42841|COX5C_HORVU Cytochrome c oxidase subunit 5C OS=Hordeum vulgare OX=4513 GN=COX5C PE=3 SV=3	S	Function unknown	PREDICTED: cytochrome c oxidase subunit 5C [Cucumis sativus]
Cla97C10G203610	815	2148	3205	651	1068	714	69.7682	119.799	201.597	41.8329	53.1489	40.8282	0.000216772	-1.65054	down	--	--	Molecular Function: nucleic acid binding (GO:0003676);; Biological Process: transcription, DNA-templated (GO:0006351);; Cellular Component: intrinsic component of membrane (GO:0031224);; Cellular Component: intracellular membrane-bounded organelle (GO:0043231);;	--	--	--	--	DNA binding protein S1FA	sp|P42552|S1FA_SPIOL DNA-binding protein S1FA OS=Spinacia oleracea OX=3562 GN=S1FA PE=3 SV=1	I	Lipid transport and metabolism	PREDICTED: DNA-binding protein S1FA-like [Cucumis melo]
Cla97C06G123710	163	193	2234	113	333	68	6.33812	4.89575	64.1533	3.3021	7.56662	1.7513	0.00591359	-2.75678	down	[J]	Translation, ribosomal structure and biogenesis	--	K02885|4.58312e-96|cmo:103494191|60S ribosomal protein L19-3-like	Ribosome (ko03010)	[J]	Translation, ribosomal structure and biogenesis	Ribosomal protein L19e	sp|P49693|RL193_ARATH 60S ribosomal protein L19-3 OS=Arabidopsis thaliana OX=3702 GN=RPL19C PE=2 SV=3	J	Translation, ribosomal structure and biogenesis	PREDICTED: 60S ribosomal protein L19-3-like [Cucumis melo]
Cla97C01G016510	1053	3656	5193	887	1609	731	24.3745	55.1785	88.3778	15.4289	21.6583	11.3119	0.000225304	-1.9251	down	[JO]	Translation, ribosomal structure and biogenesis;; Posttranslational modification, protein turnover, chaperones	Molecular Function: oxidoreductase activity (GO:0016491);; Molecular Function: vitamin binding (GO:0019842);; Cellular Component: intrinsic component of membrane (GO:0031224);; Biological Process: single-organism metabolic process (GO:0044710);; Molecular Function: transition metal ion binding (GO:0046914);;	K00472|3.3066e-176|csv:101209446|probable prolyl 4-hydroxylase 9	Arginine and proline metabolism (ko00330)	[E]	Amino acid transport and metabolism	2OG-Fe(II) oxygenase superfamily;; 2OG-Fe(II) oxygenase superfamily	sp|Q8VZJ7|P4H9_ARATH Probable prolyl 4-hydroxylase 9 OS=Arabidopsis thaliana OX=3702 GN=P4H9 PE=2 SV=1	E	Amino acid transport and metabolism	PREDICTED: probable prolyl 4-hydroxylase 9 [Cucumis sativus]
Cla97C09G163880	665	6965	13636	102	463	279	7.38466	50.4092	111.268	0.847465	2.98796	2.07156	4.68e-09	-4.98245	down	[R]	General function prediction only	Cellular Component: intrinsic component of membrane (GO:0031224);;	--	--	[R]	General function prediction only	Ankyrin repeats (3 copies);; Ankyrin repeats (many copies);; Ankyrin repeat;; Ankyrin repeats (many copies);; Domain of unknown function;; Ankyrin repeat	sp|Q9ZU96|Y2168_ARATH Ankyrin repeat-containing protein At2g01680 OS=Arabidopsis thaliana OX=3702 GN=At2g01680 PE=2 SV=1	S	Function unknown	PREDICTED: LOW QUALITY PROTEIN: ankyrin repeat-containing protein At5g02620-like [Cucumis melo]
Cla97C03G054140	110	417	586	54	118	88	3.50974	8.70477	13.7864	1.28457	2.19175	1.87699	3.7e-05	-2.39831	down	--	--	Biological Process: response to acid chemical (GO:0001101);; Biological Process: inorganic anion transport (GO:0015698);; Cellular Component: intrinsic component of membrane (GO:0031224);;	--	--	--	--	High-affinity nitrate transporter accessory	sp|Q9FGS5|NRT31_ARATH High-affinity nitrate transporter 3.1 OS=Arabidopsis thaliana OX=3702 GN=NRT3.1 PE=1 SV=1	S	Function unknown	high-affinity nitrate transporter 3.1-like precursor [Cucumis sativus]
Cla97C02G029120	1961	8167	9692	929	2058	1471	33.7462	91.5939	122.55	12.0024	20.5843	16.9158	1.64e-06	-2.44505	down	--	--	Cellular Component: intrinsic component of membrane (GO:0031224);; Biological Process: single-organism metabolic process (GO:0044710);;	--	--	[T]	Signal transduction mechanisms	Protein of unknown function (DUF568);; Eukaryotic cytochrome b561	sp|Q9FGK4|B561J_ARATH Cytochrome b561 and DOMON domain-containing protein At5g47530 OS=Arabidopsis thaliana OX=3702 GN=At5g47530 PE=2 SV=1	T	Signal transduction mechanisms	PREDICTED: cytochrome b561 and DOMON domain-containing protein At5g35735-like [Cucumis melo]
Cla97C03G053160	284	624	1103	114	401	184	11.3416	16.2598	32.4204	3.42054	9.32612	4.89804	0.000776298	-1.90374	down	--	--	Cellular Component: intrinsic component of membrane (GO:0031224);;	--	--	--	--	--	--	S	Function unknown	proline-rich receptor-like protein kinase PERK10 [Cucurbita moschata]
Cla97C05G108260	1413	6944	13366	1224	2343	1359	22.0088	70.5152	153.044	14.3299	21.2207	14.1579	0.00017298	-2.44208	down	--	--	Molecular Function: transition metal ion binding (GO:0046914);;	K16280|0|cmo:103488946|E3 ubiquitin-protein ligase RGLG2-like	--	[T]	Signal transduction mechanisms	Copine;; Zinc finger, C3HC4 type (RING finger)	sp|Q9LY87|RGLG2_ARATH E3 ubiquitin-protein ligase RGLG2 OS=Arabidopsis thaliana OX=3702 GN=RGLG2 PE=1 SV=1	O	Posttranslational modification, protein turnover, chaperones	PREDICTED: E3 ubiquitin-protein ligase RGLG2-like [Cucumis melo]
Cla97C10G202920	827	937	677	346	571	465	11.4382	8.43895	6.87868	3.58755	4.58474	4.2923	1.82e-05	-1.19959	down	--	--	Molecular Function: transferase activity, transferring glycosyl groups (GO:0016757);;	K22771|0|cmos:111442360|UDP-glycosyltransferase 73C6-like	Flavone and flavonol biosynthesis (ko00944)	[GC]	Carbohydrate transport and metabolism;; Energy production and conversion	UDP-glucoronosyl and UDP-glucosyl transferase	sp|Q9ZQ99|U73C1_ARATH UDP-glycosyltransferase 73C1 OS=Arabidopsis thaliana OX=3702 GN=UGT73C1 PE=2 SV=1	CG	Energy production and conversion;; Carbohydrate transport and metabolism	anthocyanidin 3-O-glucosyltransferase 4-like [Cucumis melo var. makuwa]
Cla97C03G067100	213	488	347	74	199	126	2.19535	3.27848	2.63121	0.573318	1.19162	0.863765	4.69e-06	-1.7284	down	[T]	Signal transduction mechanisms	Biological Process: cellular protein modification process (GO:0006464);; Molecular Function: kinase activity (GO:0016301);; Cellular Component: intrinsic component of membrane (GO:0031224);; Molecular Function: purine ribonucleoside binding (GO:0032550);;	--	--	--	--	Protein kinase domain;; Protein tyrosine and serine/threonine kinase;; LysM domain	sp|O64825|LYK4_ARATH LysM domain receptor-like kinase 4 OS=Arabidopsis thaliana OX=3702 GN=LYK4 PE=1 SV=1	T	Signal transduction mechanisms	PREDICTED: lysM domain receptor-like kinase 4 [Cucumis melo]
Cla97C02G047230	535	1256	2425	451	763	654	20.2111	30.9199	67.2962	12.7803	16.7472	16.4994	0.00328629	-1.4901	down	--	--	Cellular Component: intrinsic component of membrane (GO:0031224);;	--	--	--	--	Domain of unknown function (DUF588)	sp|Q9SKN3|CSPL6_ARATH CASP-like protein 5A2 OS=Arabidopsis thaliana OX=3702 GN=At2g28370 PE=2 SV=1	S	Function unknown	PREDICTED: CASP-like protein 5A2 [Cucumis melo]
Cla97C02G044910	3296	4543	5341	1749	2043	3147	149.585	134.363	178.112	59.6328	53.8923	95.4884	0.000239472	-1.24587	down	[O]	Posttranslational modification, protein turnover, chaperones	Cellular Component: membrane (GO:0016020);; Molecular Function: ubiquitin-like protein transferase activity (GO:0019787);; Biological Process: modification-dependent protein catabolic process (GO:0019941);; Biological Process: protein modification by small protein conjugation (GO:0032446);; Molecular Function: purine ribonucleoside binding (GO:0032550);; Cellular Component: intracellular part (GO…	--	--	[O]	Posttranslational modification, protein turnover, chaperones	Ubiquitin-conjugating enzyme	sp|Q94F47|UBC28_ARATH Ubiquitin-conjugating enzyme E2 28 OS=Arabidopsis thaliana OX=3702 GN=UBC28 PE=1 SV=1	O	Posttranslational modification, protein turnover, chaperones	PREDICTED: ubiquitin-conjugating enzyme E2 28-like [Pyrus x bretschneideri]
Cla97C04G076090	857	754	388	173	209	467	22.7133	13.0281	7.55269	3.43963	3.2221	8.28143	0.00516466	-1.61336	down	--	--	Biological Process: electron transport chain (GO:0022900);; Cellular Component: intrinsic component of membrane (GO:0031224);;	--	--	--	--	Protein of unknown function (DUF4079)	--	S	Function unknown	uncharacterized protein LOC111433189 [Cucurbita moschata]
Cla97C05G093380	1322	1779	2013	937	1187	554	56.1927	49.3031	62.8867	29.9257	29.3354	15.7301	0.000117309	-1.28243	down	[T]	Signal transduction mechanisms	Molecular Function: metal ion binding (GO:0046872);;	K13448|1.07932e-83|mcha:111013180|probable calcium-binding protein CML23	Plant-pathogen interaction (ko04626)	[T]	Signal transduction mechanisms	EF hand;; EF-hand domain pair;; EF-hand domain;; EF hand;; EF-hand domain pair;; Secreted protein acidic and rich in cysteine Ca binding region;; Cytoskeletal-regulatory complex EF hand	sp|Q9C8Y1|CML23_ARATH Probable calcium-binding protein CML23 OS=Arabidopsis thaliana OX=3702 GN=CML23 PE=2 SV=1	T	Signal transduction mechanisms	probable calcium-binding protein CML23 [Momordica charantia]
Cla97C02G049180	172	386	464	174	194	207	1.6584	2.4347	3.30159	1.26247	1.09008	1.33486	0.00378349	-1.1126	down	[T]	Signal transduction mechanisms	--	--	--	[Q]	Secondary metabolites biosynthesis, transport and catabolism	ABC-2 type transporter;; ABC transporter;; ABC-2 type transporter;; AAA domain, putative AbiEii toxin, Type IV TA system	sp|Q8RWI9|AB15G_ARATH ABC transporter G family member 15 OS=Arabidopsis thaliana OX=3702 GN=ABCG15 PE=2 SV=2	Q	Secondary metabolites biosynthesis, transport and catabolism	PREDICTED: ABC transporter G family member 12-like isoform X2 [Cucumis sativus]
Cla97C08G158780	144	233	406	108	170	162	3.65517	3.86417	7.60236	2.05635	2.51689	2.74802	0.00946093	-1.16433	down	--	--	--	--	--	--	--	Transcriptional repressor, ovate	sp|Q9LVL4|OFP3_ARATH Transcription repressor OFP3 OS=Arabidopsis thaliana OX=3702 GN=OFP3 PE=1 SV=1	S	Function unknown	transcription repressor OFP8-like [Cucumis melo var. makuwa]
Cla97C08G148950	574	5222	13370	17	206	79	5.21478	30.9334	89.3033	0.114561	1.08542	0.478742	8.01e-11	-6.38112	down	[T]	Signal transduction mechanisms	Molecular Function: protein kinase activity (GO:0004672);; Cellular Component: membrane (GO:0016020);; Molecular Function: ion binding (GO:0043167);;	--	--	--	--	Protein tyrosine and serine/threonine kinase;; Protein kinase domain;; Wall-associated receptor kinase galacturonan-binding;; EGF domain	sp|Q9LMP1|WAK2_ARATH Wall-associated receptor kinase 2 OS=Arabidopsis thaliana OX=3702 GN=WAK2 PE=1 SV=1	T	Signal transduction mechanisms	hypothetical protein Csa_018957 [Cucumis sativus]
Cla97C11G210540	198	728	575	175	413	236	8.65198	20.8351	18.5301	5.76143	10.5239	6.91573	0.00972361	-1.16261	down	--	--	Biological Process: response to hormone (GO:0009725);;	K14488|2.33173e-75|csv:101222974|auxin-induced protein X10A	Plant hormone signal transduction (ko04075)	--	--	Auxin responsive protein	sp|Q9SGU2|SAU71_ARATH Auxin-responsive protein SAUR71 OS=Arabidopsis thaliana OX=3702 GN=SAUR71 PE=2 SV=1	S	Function unknown	PREDICTED: auxin-induced protein X10A-like [Cucumis sativus]
Cla97C02G034920	604	1008	463	143	95	224	8.5281	9.27411	4.8014	1.51233	0.773983	2.11285	5.39e-07	-2.43415	down	[QV]	Secondary metabolites biosynthesis, transport and catabolism;; Defense mechanisms	Cellular Component: membrane (GO:0016020);; Molecular Function: oxidoreductase activity (GO:0016491);; Molecular Function: metal ion binding (GO:0046872);;	--	--	[Q]	Secondary metabolites biosynthesis, transport and catabolism	Cytochrome P450	sp|W8JMU7|CYQ32_CATRO Cytochrome P450 81Q32 OS=Catharanthus roseus OX=4058 GN=CYP81Q32 PE=2 SV=1	Q	Secondary metabolites biosynthesis, transport and catabolism	isoflavone 2&apos;-hydroxylase-like isoform X1 [Cucurbita pepo subsp. pepo]
Cla97C09G177670	3129	5048	4762	2783	3588	1559	187.279	196.888	209.38	125.146	124.831	62.387	0.00160846	-1.03971	down	[O]	Posttranslational modification, protein turnover, chaperones	--	K01802|6.92051e-75|cmo:103495380|peptidyl-prolyl cis-trans isomerase FKBP12	--	[O]	Posttranslational modification, protein turnover, chaperones	FKBP-type peptidyl-prolyl cis-trans isomerase	sp|O04287|FKB12_VICFA Peptidyl-prolyl cis-trans isomerase FKBP12 OS=Vicia faba OX=3906 GN=FKBP12 PE=1 SV=1	O	Posttranslational modification, protein turnover, chaperones	PREDICTED: peptidyl-prolyl cis-trans isomerase FKBP12 [Cucumis melo]
Cla97C01G017520	2895	3058	1211	600	1136	936	54.3864	37.4383	16.7055	8.46336	12.399	11.7537	5.39e-05	-1.82569	down	[G]	Carbohydrate transport and metabolism	Molecular Function: catalytic activity (GO:0003824);; Biological Process: single-organism metabolic process (GO:0044710);; Molecular Function: transition metal ion binding (GO:0046914);;	--	--	[Q]	Secondary metabolites biosynthesis, transport and catabolism	Alcohol dehydrogenase GroES-like domain;; Zinc-binding dehydrogenase;; Zinc-binding dehydrogenase;; D-isomer specific 2-hydroxyacid dehydrogenase, NAD binding domain	sp|Q9ZRF1|MTDH_FRAAN Probable mannitol dehydrogenase OS=Fragaria ananassa OX=3747 GN=CAD PE=2 SV=1	Q	Secondary metabolites biosynthesis, transport and catabolism	probable mannitol dehydrogenase-like [Cucumis sativus]
Cla97C01G005210	438	6841	7271	774	885	1067	3.10557	31.6399	37.9133	4.12482	3.64841	5.0625	0.000619085	-2.60953	down	[K]	Transcription	Cellular Component: membrane (GO:0016020);; Molecular Function: kinase activity (GO:0016301);; Molecular Function: small molecule binding (GO:0036094);; Biological Process: cellular metabolic process (GO:0044237);; Molecular Function: organic cyclic compound binding (GO:0097159);; Molecular Function: heterocyclic compound binding (GO:1901363);;	--	--	--	--	Protein kinase domain;; Protein tyrosine and serine/threonine kinase;; Leucine rich repeat;; Leucine Rich repeats (2 copies);; Leucine rich repeat N-terminal domain;; Leucine Rich Repeat	sp|Q8VZG8|MIK2_ARATH MDIS1-interacting receptor like kinase 2 OS=Arabidopsis thaliana OX=3702 GN=MIK2 PE=1 SV=3	T	Signal transduction mechanisms	putative LRR receptor-like serine/threonine-protein kinase [Cucumis melo var. makuwa]
Cla97C01G020150	1294	2491	5092	953	1540	1250	18.4984	23.209	53.4885	10.232	12.8002	11.9464	0.000905957	-1.57295	down	[P]	Inorganic ion transport and metabolism	Molecular Function: cation transmembrane transporter activity (GO:0008324);; Biological Process: ammonium transport (GO:0015696);; Cellular Component: intrinsic component of membrane (GO:0031224);;	K03320|0|csv:101218977|ammonium transporter 3 member 3	--	[P]	Inorganic ion transport and metabolism	Ammonium Transporter Family	sp|G7LAA8|AMT23_MEDTR Ammonium transporter 2 member 3 OS=Medicago truncatula OX=3880 GN=AMT2-3 PE=2 SV=2	P	Inorganic ion transport and metabolism	PREDICTED: ammonium transporter 3 member 3-like [Cucumis sativus]
Cla97C03G060170	1492	8303	15068	909	1731	711	15.3111	55.5292	113.623	7.00674	10.3237	4.87686	2.57e-06	-3.19456	down	[P]	Inorganic ion transport and metabolism	Biological Process: sulfate transport (GO:0008272);; Molecular Function: inorganic anion transmembrane transporter activity (GO:0015103);; Molecular Function: secondary active transmembrane transporter activity (GO:0015291);; Cellular Component: intrinsic component of membrane (GO:0031224);;	K17470|0|csv:101212138|sulfate transporter 1.3	--	[P]	Inorganic ion transport and metabolism	Sulfate permease family;; STAS domain	sp|Q9FEP7|SUT13_ARATH Sulfate transporter 1.3 OS=Arabidopsis thaliana OX=3702 GN=SULTR1;3 PE=2 SV=1	P	Inorganic ion transport and metabolism	PREDICTED: sulfate transporter 1.3-like [Cucumis sativus]
Cla97C02G048430	328	614	896	235	476	267	20.722	25.2812	41.5801	11.1366	17.4773	11.2493	0.00187184	-1.26021	down	--	--	Molecular Function: catalytic activity (GO:0003824);;	--	--	--	--	--	--	G	Carbohydrate transport and metabolism	hypothetical protein Csa_003587 [Cucumis sativus]
Cla97C10G190320	790	3310	3784	745	1040	666	6.51845	17.8086	22.9543	4.61796	4.99003	3.67245	7.22e-05	-1.9499	down	[NW]	Cell motility;; Extracellular structures	--	--	--	--	--	Protein tyrosine and serine/threonine kinase;; Protein kinase domain;; D-mannose binding lectin;; S-locus glycoprotein domain;; PAN-like domain	sp|O81832|Y4729_ARATH G-type lectin S-receptor-like serine/threonine-protein kinase At4g27290 OS=Arabidopsis thaliana OX=3702 GN=At4g27290 PE=3 SV=4	T	Signal transduction mechanisms	G-type lectin S-receptor-like serine/threonine-protein kinase At4g27290 [Momordica charantia]
Cla97C05G093230	112	517	883	88	156	30	5.22384	15.8002	30.4502	3.09797	4.25587	0.930152	0.000300909	-2.77788	down	--	--	Cellular Component: intrinsic component of membrane (GO:0031224);;	--	--	--	--	--	--	95		hypothetical protein E5676_scaffold712G00010 [Cucumis melo var. makuwa]
Cla97C02G027610	49	99	160	21	44	33	0.923894	1.22867	2.25095	0.293026	0.480012	0.417101	0.000438084	-1.98897	down	[M]	Cell wall/membrane/envelope biogenesis	--	--	--	[R]	General function prediction only	Kelch motif;; Kelch motif;; Kelch motif;; Galactose oxidase, central domain	sp|Q0WW40|FBK5_ARATH F-box/kelch-repeat protein At1g16250 OS=Arabidopsis thaliana OX=3702 GN=At1g16250 PE=2 SV=1	S	Function unknown	PREDICTED: F-box/kelch-repeat protein At1g16250 [Cucumis sativus]
Cla97C01G011650	365	891	1503	361	502	352	6.6921	10.6628	20.2943	4.97357	5.35568	4.32171	0.00173606	-1.48665	down	[HR]	Coenzyme transport and metabolism;; General function prediction only	--	--	--	--	--	Alpha/beta hydrolase family;; alpha/beta hydrolase fold;; Serine aminopeptidase, S33	--	S	Function unknown	PREDICTED: uncharacterized protein LOC101208945 [Cucumis sativus]
Cla97C05G092080	601	1118	1401	391	731	661	19.0627	23.1263	32.6854	9.32215	13.4814	14.0315	0.000969714	-1.13813	down	--	--	Cellular Component: intrinsic component of membrane (GO:0031224);; Biological Process: establishment of localization (GO:0051234);;	K20352|8.71039e-135|csv:101218492|transmembrane emp24 domain-containing protein p24delta3	--	[U]	Intracellular trafficking, secretion, and vesicular transport	emp24/gp25L/p24 family/GOLD	sp|Q6IDL4|P24D3_ARATH Transmembrane emp24 domain-containing protein p24delta3 OS=Arabidopsis thaliana OX=3702 GN=At1g09580 PE=1 SV=1	U	Intracellular trafficking, secretion, and vesicular transport	PREDICTED: transmembrane emp24 domain-containing protein p24delta3 [Cucumis sativus]
Cla97C08G148590	833	3045	5013	412	1093	830	5.15327	12.2907	22.8089	1.91545	3.9322	3.43704	0.000117264	-2.24609	down	--	--	Molecular Function: motor activity (GO:0003774);; Biological Process: microtubule-based process (GO:0007017);; Molecular Function: tubulin binding (GO:0015631);; Cellular Component: membrane (GO:0016020);; Molecular Function: purine ribonucleoside binding (GO:0032550);;	K11498|0|cmo:103504074|kinesin-related protein 4	--	[Z]	Cytoskeleton	Kinesin motor domain;; Microtubule binding	sp|B9FFA3|KN7E_ORYSJ Kinesin-like protein KIN-7E, chloroplastic OS=Oryza sativa subsp. japonica OX=39947 GN=KIN7E PE=3 SV=2	Z	Cytoskeleton	PREDICTED: kinesin-related protein 4 isoform X1 [Cucumis melo]
Cla97C01G009800	2290	4432	3250	1683	1853	2005	84.1543	106.164	87.7537	46.4714	39.591	49.2575	9.06e-08	-1.13572	down	[FGR]	Nucleotide transport and metabolism;; Carbohydrate transport and metabolism;; General function prediction only	--	--	--	[T]	Signal transduction mechanisms	HIT domain;; Scavenger mRNA decapping enzyme C-term binding	sp|P42856|ZB14_MAIZE 14 kDa zinc-binding protein OS=Zea mays OX=4577 GN=ZBP14 PE=1 SV=1	T	Signal transduction mechanisms	PREDICTED: 14 kDa zinc-binding protein isoform X2 [Cucumis melo]
Cla97C02G029310	95	168	123	54	83	53	0.802136	0.922959	0.76294	0.341904	0.404718	0.296185	2.33e-05	-1.35094	down	[K]	Transcription	--	--	--	[R]	General function prediction only	Leucine rich repeat;; Leucine Rich repeats (2 copies);; Leucine Rich Repeat;; Leucine rich repeat N-terminal domain	sp|Q5MR23|9DC3_SOLPI Receptor-like protein 9DC3 OS=Solanum pimpinellifolium OX=4084 GN=9DC3 PE=3 SV=1	S	Function unknown	receptor-like protein 12 [Cucurbita moschata]
Cla97C07G142000	142	642	1085	43	143	54	2.4167	7.16137	13.6498	0.548011	1.41792	0.612245	2.34e-06	-3.30574	down	--	--	Cellular Component: intrinsic component of membrane (GO:0031224);; Molecular Function: transition metal ion binding (GO:0046914);;	--	--	--	--	Wall-associated receptor kinase galacturonan-binding;; Ring finger domain;; RING-like zinc finger;; Zinc finger, C3HC4 type (RING finger);; RING-H2 zinc finger domain;; Wall-associated receptor kinase C-terminal;; Zinc finger, C3HC4 type (RING finger);; zinc-RING finger domain;; Zinc finger, C3HC4 type (RING finger);; RING-type zinc-finger	sp|P0CH01|AT21A_ARATH Putative RING-H2 finger protein ATL21A OS=Arabidopsis thaliana OX=3702 GN=ATL21A PE=3 SV=1	O	Posttranslational modification, protein turnover, chaperones	PREDICTED: putative RING-H2 finger protein ATL21A [Cucumis melo]
Cla97C02G040810	33600	80539	92656	7310	12808	13445	523.624	817.956	1060.94	85.5962	116.033	140.088	3.99e-15	-2.9249	down	--	--	Molecular Function: protein binding (GO:0005515);; Biological Process: cellular process (GO:0009987);; Cellular Component: intracellular membrane-bounded organelle (GO:0043231);; Molecular Function: metal ion binding (GO:0046872);;	K08057|0|mcha:111023298|calreticulin	Protein processing in endoplasmic reticulum (ko04141);; Phagosome (ko04145)	[O]	Posttranslational modification, protein turnover, chaperones	Calreticulin family	sp|O81919|CALR_BETVU Calreticulin OS=Beta vulgaris OX=161934 PE=2 SV=1	O	Posttranslational modification, protein turnover, chaperones	calreticulin [Momordica charantia]
Cla97C05G083070	2276	8554	12939	934	2064	633	69.0081	169.065	288.34	21.2701	36.3887	12.8324	3.65e-07	-3.03976	down	[O]	Posttranslational modification, protein turnover, chaperones	--	K00799|1.67026e-137|csv:101219529|probable glutathione S-transferase	Glutathione metabolism (ko00480)	[O]	Posttranslational modification, protein turnover, chaperones	Glutathione S-transferase, N-terminal domain;; Glutathione S-transferase, N-terminal domain;; Glutathione S-transferase, N-terminal domain;; Glutathione S-transferase, C-terminal domain;; Glutathione S-transferase, C-terminal domain	sp|P32110|GSTX6_SOYBN Probable glutathione S-transferase OS=Glycine max OX=3847 GN=HSP26-A PE=2 SV=1	O	Posttranslational modification, protein turnover, chaperones	PREDICTED: probable glutathione S-transferase [Cucumis sativus]
Cla97C10G192810	5488	13324	16383	4491	5341	4255	54.5032	86.2337	119.547	33.5147	30.8348	28.2497	7.17e-06	-1.60562	down	[O]	Posttranslational modification, protein turnover, chaperones	Molecular Function: protein binding (GO:0005515);; Biological Process: cellular process (GO:0009987);; Molecular Function: purine ribonucleoside binding (GO:0032550);;	K04043|0|cmo:103494850|heat shock 70 kDa protein, mitochondrial	RNA degradation (ko03018)	[O]	Posttranslational modification, protein turnover, chaperones	Hsp70 protein;; MreB/Mbl protein	sp|Q01899|HSP7M_PHAVU Heat shock 70 kDa protein, mitochondrial OS=Phaseolus vulgaris OX=3885 PE=2 SV=1	O	Posttranslational modification, protein turnover, chaperones	heat shock 70 kDa protein [Cucumis melo var. makuwa]
Cla97C05G096290	20234	36948	33111	15557	14121	16324	191.125	227.45	229.808	110.422	77.5433	103.095	5.65e-07	-1.2545	down	[O]	Posttranslational modification, protein turnover, chaperones	Molecular Function: endopeptidase activity (GO:0004175);; Biological Process: protein metabolic process (GO:0019538);; Cellular Component: intrinsic component of membrane (GO:0031224);; Molecular Function: purine ribonucleoside binding (GO:0032550);;	K03798|0|csv:101221159|ATP-dependent zinc metalloprotease FTSH, chloroplastic	--	[O]	Posttranslational modification, protein turnover, chaperones	Peptidase family M41;; ATPase family associated with various cellular activities (AAA);; AAA+ lid domain;; AAA domain (dynein-related subfamily)	sp|O82150|FTSH_TOBAC ATP-dependent zinc metalloprotease FTSH, chloroplastic OS=Nicotiana tabacum OX=4097 GN=FTSH PE=2 SV=2	O	Posttranslational modification, protein turnover, chaperones	PREDICTED: ATP-dependent zinc metalloprotease FTSH, chloroplastic [Cucumis sativus]
Cla97C11G206970	396	396	2369	116	324	66	9.18454	5.98685	40.4409	2.018	4.37275	1.01748	0.000187518	-3.07472	down	--	--	Biological Process: transcription, DNA-templated (GO:0006351);;	--	--	--	--	Myb-like DNA-binding domain	sp|Q700D9|MYBF_ARATH Putative Myb family transcription factor At1g14600 OS=Arabidopsis thaliana OX=3702 GN=At1g14600 PE=2 SV=2	K	Transcription	PREDICTED: putative Myb family transcription factor At1g14600 [Cucumis melo]
Cla97C05G083290	825	2114	2673	583	987	801	3.68902	6.16055	8.78287	1.95783	2.56635	2.39473	8.41e-05	-1.54704	down	[V]	Defense mechanisms	Biological Process: transport (GO:0006810);; Molecular Function: P-P-bond-hydrolysis-driven transmembrane transporter activity (GO:0015405);; Molecular Function: nucleoside-triphosphatase activity (GO:0017111);; Cellular Component: intrinsic component of membrane (GO:0031224);; Molecular Function: purine ribonucleoside binding (GO:0032550);;	--	--	[Q]	Secondary metabolites biosynthesis, transport and catabolism	ABC transporter transmembrane region;; ABC transporter;; P-loop containing region of AAA domain;; 50S ribosome-binding GTPase	sp|Q9M1C7|AB9C_ARATH ABC transporter C family member 9 OS=Arabidopsis thaliana OX=3702 GN=ABCC9 PE=2 SV=2	Q	Secondary metabolites biosynthesis, transport and catabolism	PREDICTED: putative ABC transporter C family member 15 [Cucumis melo]
Cla97C02G038730	2853	4356	2837	1514	1431	2077	114.853	114.278	83.8997	45.7746	33.4728	55.8954	1.44e-05	-1.30023	down	--	--	--	--	--	--	--	--	--	182		PREDICTED: uncharacterized protein LOC101208092 [Cucumis sativus]
Cla97C11G218140	4534	11771	14604	3779	5327	3780	62.3278	105.45	147.503	39.0251	42.5709	34.7399	3.52e-05	-1.55622	down	--	--	Biological Process: phosphate-containing compound metabolic process (GO:0006796);; Biological Process: G-protein coupled receptor signaling pathway (GO:0007186);; Molecular Function: kinase activity (GO:0016301);; Molecular Function: purine ribonucleoside binding (GO:0032550);;	K00901|0|cmo:103493013|diacylglycerol kinase 7-like	Glycerolipid metabolism (ko00561);; Glycerophospholipid metabolism (ko00564);; Phosphatidylinositol signaling system (ko04070)	[IT]	Lipid transport and metabolism;; Signal transduction mechanisms	Diacylglycerol kinase accessory domain;; Diacylglycerol kinase catalytic domain	sp|F4JQ95|DGK7_ARATH Diacylglycerol kinase 7 OS=Arabidopsis thaliana OX=3702 GN=DGK7 PE=1 SV=1	IT	Lipid transport and metabolism;; Signal transduction mechanisms	PREDICTED: diacylglycerol kinase 7-like [Cucumis melo]
Cla97C04G074510	121	640	282	30	51	43	2.7438	9.49658	4.70243	0.512433	0.662575	0.6479	1.02e-09	-3.29447	down	--	--	--	--	--	--	--	C1 domain	--	S	Function unknown	uncharacterized protein LOC111453229 [Cucurbita moschata]
Cla97C10G205240	46	84	133	6	32	13	2.82754	3.34534	5.98234	0.231313	1.11646	0.523183	0.000118244	-2.76826	down	[U]	Intracellular trafficking, secretion, and vesicular transport	Molecular Function: protein kinase activity (GO:0004672);; Biological Process: cellular protein modification process (GO:0006464);; Biological Process: phosphate-containing compound metabolic process (GO:0006796);; Cellular Component: intrinsic component of membrane (GO:0031224);; Molecular Function: purine ribonucleoside binding (GO:0032550);;	--	--	--	--	Protein kinase domain;; Protein tyrosine and serine/threonine kinase	sp|C0LGP4|Y3475_ARATH Probable LRR receptor-like serine/threonine-protein kinase At3g47570 OS=Arabidopsis thaliana OX=3702 GN=At3g47570 PE=2 SV=1	T	Signal transduction mechanisms	hypothetical protein Csa_001896 [Cucumis sativus]
Cla97C02G033070	71	288	468	7	12	6	0.989675	2.64235	4.84253	0.070161	0.092375	0.053196	2.1e-13	-5.34043	down	[G]	Carbohydrate transport and metabolism	Molecular Function: transferase activity, transferring glycosyl groups (GO:0016757);;	K23260|0|csv:105436104|scopoletin glucosyltransferase	Phenylpropanoid biosynthesis (ko00940)	[GC]	Carbohydrate transport and metabolism;; Energy production and conversion	UDP-glucoronosyl and UDP-glucosyl transferase	sp|Q9AT54|SCGT_TOBAC Scopoletin glucosyltransferase OS=Nicotiana tabacum OX=4097 GN=TOGT1 PE=1 SV=1	CG	Energy production and conversion;; Carbohydrate transport and metabolism	PREDICTED: scopoletin glucosyltransferase-like [Cucumis sativus]
Cla97C01G007690	10557	20564	20451	9515	7948	10761	90.3741	114.734	128.644	61.209	39.5549	61.5966	0.000251553	-1.13903	down	[O]	Posttranslational modification, protein turnover, chaperones	Molecular Function: protein binding (GO:0005515);; Biological Process: cellular process (GO:0009987);; Molecular Function: purine ribonucleoside binding (GO:0032550);; Biological Process: response to stimulus (GO:0050896);;	K09487|0|csv:101215867|heat shock protein 90-5, chloroplastic	Protein processing in endoplasmic reticulum (ko04141);; Plant-pathogen interaction (ko04626)	[O]	Posttranslational modification, protein turnover, chaperones	Hsp90 protein;; Histidine kinase-, DNA gyrase B-, and HSP90-like ATPase;; Histidine kinase-, DNA gyrase B-, and HSP90-like ATPase	sp|Q9SIF2|HS905_ARATH Heat shock protein 90-5, chloroplastic OS=Arabidopsis thaliana OX=3702 GN=HSP90-5 PE=1 SV=1	O	Posttranslational modification, protein turnover, chaperones	PREDICTED: heat shock protein 83 [Cucumis sativus]
Cla97C10G199560	66	116	154	30	52	27	3.08894	3.57495	5.34358	1.04279	1.42567	0.832197	3.43e-05	-1.96758	down	[J]	Translation, ribosomal structure and biogenesis	Molecular Function: nucleic acid binding (GO:0003676);; Molecular Function: catalytic activity (GO:0003824);; Molecular Function: structural molecule activity (GO:0005198);; Cellular Component: plastid (GO:0009536);; Biological Process: gene expression (GO:0010467);; Cellular Component: ribosomal subunit (GO:0044391);;	K02886|1.8461e-94|mcha:36165275|rpl2, C4D86_pgp024; ribosomal protein L2	Ribosome (ko03010)	[J]	Translation, ribosomal structure and biogenesis	Ribosomal Proteins L2, C-terminal domain	sp|Q4VZK5|RK2_CUCSA 50S ribosomal protein L2, chloroplastic OS=Cucumis sativus OX=3659 GN=rpl2-A PE=3 SV=1	J	Translation, ribosomal structure and biogenesis	ribosomal protein L2 [Cucumis melo var. makuwa]
Cla97C01G010680	171	175	72	65	83	37	3.32674	2.22697	1.02185	0.95395	0.937626	0.479821	0.0068944	-1.5668	down	--	--	Molecular Function: cation channel activity (GO:0005261);; Cellular Component: intrinsic component of membrane (GO:0031224);; Biological Process: cellular potassium ion transport (GO:0071804);;	K05389|0|csv:101214791|two-pore potassium channel 1	--	[P]	Inorganic ion transport and metabolism	Ion channel;; Ion transport protein	sp|Q8LBL1|KCO1_ARATH Two-pore potassium channel 1 OS=Arabidopsis thaliana OX=3702 GN=TPK1 PE=1 SV=2	P	Inorganic ion transport and metabolism	PREDICTED: two-pore potassium channel 1-like [Cucumis sativus]
Cla97C11G211370	773	1492	1332	490	886	478	16.5825	20.8668	21.008	7.90233	11.0546	6.86194	1.68e-06	-1.29285	down	--	--	Biological Process: cellular amino acid biosynthetic process (GO:0008652);; Molecular Function: intramolecular transferase activity (GO:0016866);; Biological Process: dicarboxylic acid metabolic process (GO:0043648);;	K01850|0|csv:101203315|chorismate mutase 1, chloroplastic	Phenylalanine, tyrosine and tryptophan biosynthesis (ko00400);; Biosynthesis of amino acids (ko01230)	[E]	Amino acid transport and metabolism	--	sp|P42738|CM1_ARATH Chorismate mutase 1, chloroplastic OS=Arabidopsis thaliana OX=3702 GN=CM1 PE=1 SV=3	E	Amino acid transport and metabolism	PREDICTED: chorismate mutase 1, chloroplastic [Cucumis sativus]
Cla97C09G180490	443	765	806	87	253	178	8.18528	9.20586	10.9337	1.20249	2.71217	2.19436	1.08e-09	-2.32472	down	[M]	Cell wall/membrane/envelope biogenesis	Biological Process: steroid metabolic process (GO:0008202);; Molecular Function: steroid dehydrogenase activity, acting on the CH-OH group of donors, NAD or NADP as acceptor (GO:0033764);;	--	--	[V]	Defense mechanisms	NAD(P)H-binding;; 3-beta hydroxysteroid dehydrogenase/isomerase family;; NAD dependent epimerase/dehydratase family;; NmrA-like family	sp|Q0JKZ0|SNL6_ORYSJ Cinnamoyl-CoA reductase-like SNL6 OS=Oryza sativa subsp. japonica OX=39947 GN=SNL6 PE=3 SV=1	V	Defense mechanisms	cinnamoyl-CoA reductase-like SNL6 [Cucurbita moschata]
Cla97C08G154220	1857	3169	2062	853	1699	1826	47.9199	53.3093	39.1028	16.5415	25.4901	31.5092	0.00109909	-1.0286	down	--	--	Molecular Function: nuclease activity (GO:0004518);; Molecular Function: protein binding (GO:0005515);; Biological Process: nucleic acid metabolic process (GO:0090304);;	K06630|0|cmo:103488075|6E04; 14-3-3-like protein	--	[O]	Posttranslational modification, protein turnover, chaperones	14-3-3 protein	sp|P46266|1433_PEA 14-3-3-like protein OS=Pisum sativum OX=3888 PE=2 SV=1	O	Posttranslational modification, protein turnover, chaperones	PREDICTED: 14-3-3-like protein [Cucumis melo]
Cla97C11G217280	138	286	346	106	140	80	8.69897	11.7727	16.0348	5.01341	5.1354	3.37502	0.000117036	-1.55079	down	--	--	--	--	--	--	--	--	--	--	--	hypothetical protein Csa_006343 [Cucumis sativus]
Cla97C01G008910	443	1401	1523	391	807	452	4.70944	9.72399	11.9113	3.12584	4.99233	3.21274	0.00212975	-1.33793	down	[T]	Signal transduction mechanisms	Biological Process: cellular protein modification process (GO:0006464);; Molecular Function: kinase activity (GO:0016301);; Cellular Component: intrinsic component of membrane (GO:0031224);; Molecular Function: purine ribonucleoside binding (GO:0032550);;	--	--	--	--	Protein tyrosine and serine/threonine kinase;; Protein kinase domain;; Leucine rich repeat;; Leucine Rich repeats (2 copies);; Leucine rich repeat N-terminal domain	sp|Q9FMD7|Y5659_ARATH Probable inactive receptor kinase At5g16590 OS=Arabidopsis thaliana OX=3702 GN=At5g16590 PE=1 SV=1	T	Signal transduction mechanisms	PREDICTED: probable inactive receptor kinase At3g02880 [Cucumis melo]
Cla97C11G206840	1750	3814	5823	1766	2617	1784	17.0528	24.221	41.6939	12.9291	14.8246	11.6211	0.00285487	-1.19875	down	--	--	--	--	--	--	--	--	--	1200		PREDICTED: myosin-9 isoform X2 [Cucumis melo]
Cla97C10G197870	449	1261	3048	559	567	427	4.27463	7.83752	21.3634	4.00468	3.14344	2.71784	0.0020841	-1.89464	down	--	--	Molecular Function: structural molecule activity (GO:0005198);; Biological Process: gene expression (GO:0010467);; Cellular Component: intracellular ribonucleoprotein complex (GO:0030529);; Cellular Component: intrinsic component of membrane (GO:0031224);;	--	--	--	--	Protein of unknown function (DUF1666)	--	S	Function unknown	PREDICTED: uncharacterized protein LOC101211770 [Cucumis sativus]
Cla97C08G160570	2122	4093	5888	1452	1915	1231	73.5768	92.4995	150.051	37.8287	38.6018	28.5284	2.66e-06	-1.71145	down	--	--	--	--	--	[S]	Function unknown	Eukaryotic protein of unknown function (DUF866)	sp|Q3B8G0|CZIB_XENLA CXXC motif containing zinc binding protein OS=Xenopus laevis OX=8355 GN=czib PE=2 SV=1	S	Function unknown	UPF0587 protein C1orf123 homolog [Cucurbita moschata]
Cla97C10G190010	600	2228	2857	125	493	181	32.942	79.8189	115.392	5.16365	15.7326	6.64061	1.14e-07	-3.18627	down	--	--	Molecular Function: metal ion binding (GO:0046872);;	K10840|1.60469e-70|csv:101209897|calcium-binding protein KRP1	--	[ZD]	Cytoskeleton;; Cell cycle control, cell division, chromosome partitioning	EF-hand domain pair	sp|O81831|CARP1_ARATH Calcium-binding protein KRP1 OS=Arabidopsis thaliana OX=3702 GN=KRP1 PE=2 SV=1	DZ	Cell cycle control, cell division, chromosome partitioning;; Cytoskeleton	PREDICTED: calcium-binding protein PBP1 [Cucumis sativus]
Cla97C01G000200	996	1726	1818	604	1326	843	20.7785	23.4746	27.88	9.4736	16.0846	11.756	0.000255044	-1.06715	down	[G]	Carbohydrate transport and metabolism	Biological Process: NADP metabolic process (GO:0006739);; Molecular Function: carboxylic ester hydrolase activity (GO:0052689);;	K01057|0|cpep:111809206|probable 6-phosphogluconolactonase 4, chloroplastic	Pentose phosphate pathway (ko00030);; Carbon metabolism (ko01200)	[G]	Carbohydrate transport and metabolism	Glucosamine-6-phosphate isomerases/6-phosphogluconolactonase	sp|A2Z3C4|6PGL4_ORYSI Probable 6-phosphogluconolactonase 4, chloroplastic OS=Oryza sativa subsp. indica OX=39946 GN=OsI_031067 PE=3 SV=2	G	Carbohydrate transport and metabolism	probable 6-phosphogluconolactonase 4, chloroplastic [Cucurbita pepo subsp. pepo]
Cla97C11G223580	3984	7706	5723	2380	3901	3912	27.888	35.1576	29.4407	12.5187	15.8783	18.309	4.15e-06	-1.08554	down	[C]	Energy production and conversion	Molecular Function: phosphoenolpyruvate carboxykinase activity (GO:0004611);; Biological Process: citrate metabolic process (GO:0006101);;	K01595|0|cmo:103501810|phosphoenolpyruvate carboxylase, housekeeping isozyme	Pyruvate metabolism (ko00620);; Carbon fixation in photosynthetic organisms (ko00710);; Carbon metabolism (ko01200)	--	--	Phosphoenolpyruvate carboxylase	sp|Q02909|CAPP1_SOYBN Phosphoenolpyruvate carboxylase, housekeeping isozyme OS=Glycine max OX=3847 GN=PPC16 PE=2 SV=1	C	Energy production and conversion	PREDICTED: phosphoenolpyruvate carboxylase, housekeeping isozyme [Cucumis melo]
Cla97C11G223070	3064	9904	6207	2713	2787	4426	39.8452	83.9496	59.3091	26.5131	21.0682	38.4869	0.0029029	-1.17711	down	[QV]	Secondary metabolites biosynthesis, transport and catabolism;; Defense mechanisms	Molecular Function: oxidoreductase activity (GO:0016491);; Biological Process: single-organism metabolic process (GO:0044710);; Molecular Function: tetrapyrrole binding (GO:0046906);; Molecular Function: transition metal ion binding (GO:0046914);;	--	--	[QI]	Secondary metabolites biosynthesis, transport and catabolism;; Lipid transport and metabolism	Cytochrome P450	sp|H2DH21|C7A29_PANGI Cytochrome P450 CYP72A219 OS=Panax ginseng OX=4054 PE=2 SV=1	Q	Secondary metabolites biosynthesis, transport and catabolism	PREDICTED: cytochrome P450 CYP72A219-like [Cucumis melo]
Cla97C05G108240	1325	6255	9346	2389	2356	1779	21.276	65.479	110.313	28.8384	21.9954	19.0986	0.0056752	-1.61622	down	[QV]	Secondary metabolites biosynthesis, transport and catabolism;; Defense mechanisms	--	--	--	[Q]	Secondary metabolites biosynthesis, transport and catabolism	Cytochrome P450	sp|Q9LIP3|C71BY_ARATH Cytochrome P450 71B37 OS=Arabidopsis thaliana OX=3702 GN=CYP71B37 PE=3 SV=2	Q	Secondary metabolites biosynthesis, transport and catabolism	cytochrome P450 71B37-like [Cucumis melo var. makuwa]
Cla97C02G040350	1125	4759	8432	517	1181	813	34.8964	96.2079	192.204	12.0351	21.2959	16.8551	3.81e-06	-2.82045	down	[G]	Carbohydrate transport and metabolism	Molecular Function: transition metal ion binding (GO:0046914);;	--	--	--	--	Cupin;; Cupin domain	sp|Q6I544|GL52_ORYSJ Germin-like protein 5-1 OS=Oryza sativa subsp. japonica OX=39947 GN=Os05g0277500 PE=2 SV=1	O	Posttranslational modification, protein turnover, chaperones	PREDICTED: germin-like protein 5-1 [Cucumis sativus]
Cla97C05G079960	5127	14096	17095	4718	9954	5800	61.4759	110.161	150.626	42.5087	69.3923	46.4954	0.00525583	-1.14821	down	--	--	--	--	--	--	--	No apical meristem (NAM) protein	sp|Q9SCK6|NAC62_ARATH NAC domain-containing protein 62 OS=Arabidopsis thaliana OX=3702 GN=NAC062 PE=1 SV=1	K	Transcription	NAC domain-containing protein 62-like [Momordica charantia]
Cla97C02G042320	1260	2821	3420	1310	1691	1440	48.6808	71.0519	97.1063	38.0375	37.9724	37.1842	0.0015822	-1.05119	down	--	--	--	--	--	[O]	Posttranslational modification, protein turnover, chaperones	PITH domain	sp|Q9SQZ9|PITH1_ARATH PITH domain-containing protein At3g04780 OS=Arabidopsis thaliana OX=3702 GN=At3g04780 PE=1 SV=2	O	Posttranslational modification, protein turnover, chaperones	PITH domain-containing protein At3g04780-like [Cucurbita moschata]
Cla97C10G194390	275	652	727	155	328	252	6.06944	9.38052	11.7963	2.56951	4.20641	3.71583	0.00011901	-1.49169	down	--	--	Molecular Function: nucleic acid binding transcription factor activity (GO:0001071);; Molecular Function: DNA binding (GO:0003677);; Biological Process: transcription, DNA-templated (GO:0006351);;	--	--	--	--	WRKY DNA -binding domain	sp|O22900|WRK23_ARATH WRKY transcription factor 23 OS=Arabidopsis thaliana OX=3702 GN=WRKY23 PE=2 SV=1	K	Transcription	PREDICTED: LOW QUALITY PROTEIN: probable WRKY transcription factor 68 [Cucumis melo]
Cla97C10G187400	5819	4877	263	68	1163	367	309.883	169.264	10.2582	2.68539	35.998	13.0547	0.00172046	-3.34941	down	--	--	--	--	--	--	--	Hydrophobic seed protein	sp|Q9SU34|ERLL2_ARATH pEARLI1-like lipid transfer protein 2 OS=Arabidopsis thaliana OX=3702 GN=At4g12490 PE=2 SV=1	S	Function unknown	cortical cell-delineating protein [Oryza sativa Japonica Group]
Cla97C08G154360	109	412	1514	24	133	42	1.98602	4.90379	20.3221	0.326118	1.40866	0.513064	3.04e-05	-3.76056	down	--	--	Cellular Component: intrinsic component of membrane (GO:0031224);; Molecular Function: transition metal ion binding (GO:0046914);;	K10664|0|csv:101209245|RING-H2 finger protein ATL11	--	[O]	Posttranslational modification, protein turnover, chaperones	Ring finger domain;; RING-like zinc finger;; Zinc finger, C3HC4 type (RING finger);; RING-H2 zinc finger domain;; Zinc finger, C3HC4 type (RING finger);; RING-type zinc-finger;; Anaphase-promoting complex subunit 11 RING-H2 finger	sp|Q9M0R5|ATL36_ARATH Putative RING-H2 finger protein ATL36 OS=Arabidopsis thaliana OX=3702 GN=ATL36 PE=3 SV=1	O	Posttranslational modification, protein turnover, chaperones	PREDICTED: RING-H2 finger protein ATL11-like [Cucumis sativus]
Cla97C05G099840	325	557	648	282	425	229	21.9648	24.5079	32.1807	14.2929	16.6919	10.3298	0.00118842	-1.04564	down	--	--	--	--	--	--	--	--	--	64		uncharacterized protein LOC109949443 [Prunus persica]
Cla97C05G085950	2004	3619	6770	1497	2383	1753	18.6411	21.9395	46.2736	10.4601	12.8846	10.8994	0.000610952	-1.46969	down	--	--	--	K23951|0|cmo:103483674|dymeclin	--	[R]	General function prediction only	Dyggve-Melchior-Clausen syndrome protein;; High-temperature-induced dauer-formation protein	sp|Q8CHY3|DYM_MOUSE Dymeclin OS=Mus musculus OX=10090 GN=Dym PE=1 SV=1	S	Function unknown	PREDICTED: dymeclin [Cucumis melo]
Cla97C06G116970	132	223	227	51	115	112	3.07344	3.39913	3.90301	0.885294	1.56444	1.74288	0.000387886	-1.40964	down	--	--	Cellular Component: intrinsic component of membrane (GO:0031224);;	--	--	--	--	Family of unknown function (DUF716)	--	S	Function unknown	PREDICTED: uncharacterized protein LOC103499449 isoform X1 [Cucumis melo]
Cla97C06G124750	137	239	223	91	173	100	3.83684	4.36476	4.59273	1.91675	2.80882	1.86053	0.000701025	-1.06518	down	--	--	Biological Process: cell cycle (GO:0007049);; Cellular Component: intracellular organelle (GO:0043229);;	--	--	--	--	Mis12 protein	sp|Q2V0Z5|MIS12_ARATH Protein MIS12 homolog OS=Arabidopsis thaliana OX=3702 GN=MIS12 PE=3 SV=1	S	Function unknown	Centromere protein Mis12 [Cucumis melo var. makuwa]
Cla97C10G198500	1961	4728	5957	1189	3163	718	79.8848	125.52	178.314	36.3808	74.9081	19.5507	0.00194859	-1.68988	down	[T]	Signal transduction mechanisms	Molecular Function: metal ion binding (GO:0046872);;	K13448|1.49707e-64|cmo:103486950|probable calcium-binding protein CML35	Plant-pathogen interaction (ko04626)	[T]	Signal transduction mechanisms	EF hand;; EF hand;; EF-hand domain;; EF-hand domain pair	sp|Q9SS31|CML36_ARATH Probable calcium-binding protein CML36 OS=Arabidopsis thaliana OX=3702 GN=CML36 PE=2 SV=1	T	Signal transduction mechanisms	PREDICTED: probable calcium-binding protein CML35 [Cucumis melo]
Cla97C10G202740	841	1969	2928	759	822	1106	25.1526	38.4013	64.3626	17.0481	14.2919	22.1168	0.00207012	-1.37043	down	--	--	--	K19373|2.52723e-126|csv:101220350|uncharacterized protein LOC101220350 isoform X1	--	[O]	Posttranslational modification, protein turnover, chaperones	Domain of unknown function (DUF1992)	sp|Q8VCE1|DJC28_MOUSE DnaJ homolog subfamily C member 28 OS=Mus musculus OX=10090 GN=Dnajc28 PE=1 SV=2	O	Posttranslational modification, protein turnover, chaperones	dnaJ homolog subfamily C member 28 [Cucurbita pepo subsp. pepo]
Cla97C02G034410	54	426	514	11	40	14	0.333697	1.74276	2.36942	0.051021	0.146147	0.056269	9.79e-08	-4.24788	down	[R]	General function prediction only	--	--	--	[T]	Signal transduction mechanisms	NB-ARC domain;; Rx N-terminal domain	sp|Q7XA40|RGA3_SOLBU Putative disease resistance protein RGA3 OS=Solanum bulbocastanum OX=147425 GN=RGA3 PE=2 SV=2	T	Signal transduction mechanisms	PREDICTED: putative disease resistance protein RGA3 [Cucumis melo]
Cla97C09G173590	1551	4516	5827	519	1586	1038	33.3929	63.3843	92.2151	8.39963	19.8588	14.9359	4.8e-06	-2.25524	down	[H]	Coenzyme transport and metabolism	--	K13789|9.98964e-154|cpep:111797413|heterodimeric geranylgeranyl pyrophosphate synthase small subunit, chloroplastic-like	Terpenoid backbone biosynthesis (ko00900)	[H]	Coenzyme transport and metabolism	--	sp|Q39108|GGR_ARATH Heterodimeric geranylgeranyl pyrophosphate synthase small subunit, chloroplastic OS=Arabidopsis thaliana OX=3702 GN=GGR PE=1 SV=2	H	Coenzyme transport and metabolism	heterodimeric geranylgeranyl pyrophosphate synthase small subunit, chloroplastic-like [Cucurbita pepo subsp. pepo]
Cla97C04G072030	726	1805	3012	839	1125	621	16.4011	26.594	50.0513	14.2605	14.7925	9.38425	0.00370045	-1.40431	down	[S]	Function unknown	Cellular Component: intrinsic component of membrane (GO:0031224);; Biological Process: protein oligomerization (GO:0051259);;	K21919|0|csv:101220621|FH protein interacting protein FIP2 isoform X2	--	[R]	General function prediction only	Pentapeptide repeats (8 copies);; Pentapeptide repeats (9 copies);; BTB/POZ domain;; Pentapeptide repeats (9 copies)	sp|Q9SE95|FIP2_ARATH FH protein interacting protein FIP2 OS=Arabidopsis thaliana OX=3702 GN=FIP2 PE=1 SV=1	K	Transcription	PREDICTED: FH protein interacting protein FIP2 isoform X2 [Cucumis sativus]
Cla97C08G161680	2173	4832	4639	1893	2754	2226	201.32	291.747	315.774	131.743	148.335	137.834	4.15e-05	-1.06159	down	--	--	Biological Process: generation of precursor metabolites and energy (GO:0006091);; Molecular Function: hydrogen ion transmembrane transporter activity (GO:0015078);; Biological Process: proton transport (GO:0015992);; Cellular Component: organelle inner membrane (GO:0019866);; Cellular Component: membrane part (GO:0044425);;	--	--	--	--	Cytochrome b-c1 complex subunit 8;; UcrQ family	sp|Q9SG91|UCRQ1_ARATH Cytochrome b-c1 complex subunit 8-1, mitochondrial OS=Arabidopsis thaliana OX=3702 GN=UCRQ-1 PE=1 SV=1	S	Function unknown	cytochrome b-c1 complex subunit 8-like [Cucurbita moschata]
Cla97C09G168010	944	10873	12877	522	780	879	11.434	85.8835	114.675	4.74629	5.49418	7.11675	2.47e-07	-3.72346	down	[GI]	Carbohydrate transport and metabolism;; Lipid transport and metabolism	Biological Process: polysaccharide catabolic process (GO:0000272);; Molecular Function: enzyme regulator activity (GO:0030234);; Cellular Component: external encapsulating structure (GO:0030312);; Biological Process: negative regulation of molecular function (GO:0044092);; Molecular Function: carboxylic ester hydrolase activity (GO:0052689);; Biological Process: cell wall organization (GO:0071555…	K01051|0|cmo:103492791|probable pectinesterase/pectinesterase inhibitor 7	Pentose and glucuronate interconversions (ko00040)	--	--	Pectinesterase;; Plant invertase/pectin methylesterase inhibitor	sp|Q9SRX4|PME7_ARATH Probable pectinesterase/pectinesterase inhibitor 7 OS=Arabidopsis thaliana OX=3702 GN=PME7 PE=2 SV=1	G	Carbohydrate transport and metabolism	PREDICTED: probable pectinesterase/pectinesterase inhibitor 7 [Cucumis melo]
Cla97C01G017650	284	1398	2495	374	538	403	2.38213	7.66293	15.4165	2.36213	2.62637	2.26342	0.00227064	-1.94072	down	[D]	Cell cycle control, cell division, chromosome partitioning	Biological Process: phosphate-containing compound metabolic process (GO:0006796);; Molecular Function: kinase activity (GO:0016301);; Molecular Function: ubiquitin-like protein transferase activity (GO:0019787);; Biological Process: protein modification by small protein conjugation (GO:0032446);; Molecular Function: purine ribonucleoside binding (GO:0032550);;	--	--	--	--	Protein tyrosine and serine/threonine kinase;; U-box domain	sp|Q9FGD7|PUB50_ARATH Putative U-box domain-containing protein 50 OS=Arabidopsis thaliana OX=3702 GN=PUB50 PE=3 SV=1	T	Signal transduction mechanisms	putative U-box domain-containing protein 50 isoform X1 [Cucumis melo var. makuwa]
Cla97C01G018460	174	1219	2167	34	135	104	2.02624	9.25995	18.5664	0.290619	0.90857	0.809595	3.04e-07	-4.01803	down	[DPM]	Cell cycle control, cell division, chromosome partitioning;; Inorganic ion transport and metabolism;; Cell wall/membrane/envelope biogenesis	Molecular Function: catalytic activity (GO:0003824);; Biological Process: single-organism metabolic process (GO:0044710);; Molecular Function: transition metal ion binding (GO:0046914);;	--	--	[Q]	Secondary metabolites biosynthesis, transport and catabolism	Multicopper oxidase;; Multicopper oxidase;; Multicopper oxidase	sp|P14133|ASO_CUCSA L-ascorbate oxidase OS=Cucumis sativus OX=3659 PE=1 SV=1	Q	Secondary metabolites biosynthesis, transport and catabolism	PREDICTED: L-ascorbate oxidase [Cucumis melo]
Cla97C09G174770	537	1419	1015	134	293	351	15.7118	27.0691	21.8353	2.94308	4.98715	6.85844	9.25e-08	-2.224	down	--	--	--	K14496|7.68101e-127|csv:101218875|abscisic acid receptor PYR1	MAPK signaling pathway - plant (ko04016);; Plant hormone signal transduction (ko04075)	--	--	Polyketide cyclase / dehydrase and lipid transport;; Polyketide cyclase / dehydrase and lipid transport	sp|O49686|PYR1_ARATH Abscisic acid receptor PYR1 OS=Arabidopsis thaliana OX=3702 GN=PYR1 PE=1 SV=1	S	Function unknown	PREDICTED: abscisic acid receptor PYR1-like [Cucumis sativus]
Cla97C07G144470	61	213	1689	94	204	65	0.728859	1.65731	14.8545	0.840483	1.41785	0.520071	0.00578032	-2.80376	down	--	--	--	--	--	--	--	--	--	S	Function unknown	PREDICTED: WEB family protein At5g16730, chloroplastic [Cucumis melo]
Cla97C09G179590	414	827	1687	257	337	294	11.992	15.6431	35.977	5.60095	5.6754	5.70045	3.83e-05	-2.03137	down	--	--	Molecular Function: transition metal ion binding (GO:0046914);;	K11982|1.56533e-92|cmo:103498739|E3 ubiquitin-protein ligase RING1-like	--	[O]	Posttranslational modification, protein turnover, chaperones	Ring finger domain;; RING-like zinc finger;; Zinc finger, C3HC4 type (RING finger);; RING-H2 zinc finger domain;; Zinc finger, C3HC4 type (RING finger);; RING-type zinc-finger;; Anaphase-promoting complex subunit 11 RING-H2 finger	sp|Q9LQX2|MPSR1_ARATH E3 ubiquitin-protein ligase MPSR1 OS=Arabidopsis thaliana OX=3702 GN=MPSR1 PE=1 SV=1	O	Posttranslational modification, protein turnover, chaperones	PREDICTED: E3 ubiquitin-protein ligase RING1-like [Cucumis melo]
Cla97C09G173710	3608	7188	12041	888	1752	910	54.7043	71.0279	134.158	10.1093	15.4435	9.22327	4.2e-12	-3.0328	down	[F]	Nucleotide transport and metabolism	Molecular Function: phosphorylase activity (GO:0004645);;	K14190|0|cmo:103490128|GDP-L-galactose phosphorylase 1	Ascorbate and aldarate metabolism (ko00053);; Biosynthesis of cofactors (ko01240)	[R]	General function prediction only	--	sp|Q8RWE8|GGAP1_ARATH GDP-L-galactose phosphorylase 1 OS=Arabidopsis thaliana OX=3702 GN=VTC2 PE=1 SV=1	S	Function unknown	PREDICTED: GDP-L-galactose phosphorylase 1 [Cucumis melo]
Cla97C07G139270	1041	1349	1138	373	970	619	25.499	21.5351	20.4826	6.86602	13.8183	10.1386	8.95e-05	-1.24196	down	--	--	Cellular Component: intrinsic component of membrane (GO:0031224);;	--	--	--	--	--	sp|Q9LVZ7|PDCT1_ARATH Phosphatidylcholine:diacylglycerol cholinephosphotransferase 1 OS=Arabidopsis thaliana OX=3702 GN=ROD1 PE=1 SV=1	S	Function unknown	phosphatidylcholine:diacylglycerol cholinephosphotransferase 1-like [Momordica charantia]
Cla97C03G056800	1090	1689	1358	229	649	742	14.1684	14.3121	12.9752	2.22884	4.90657	6.44681	5.66e-05	-1.70949	down	[G]	Carbohydrate transport and metabolism	Molecular Function: secondary active transmembrane transporter activity (GO:0015291);; Molecular Function: oxidoreductase activity, acting on the CH-CH group of donors, NAD or NADP as acceptor (GO:0016628);; Cellular Component: intrinsic component of membrane (GO:0031224);; Biological Process: single-organism metabolic process (GO:0044710);; Biological Process: single-organism transport (GO:00447…	K24193|0|cmo:103485942|sugar carrier protein C-like	--	[R]	General function prediction only	Sugar (and other) transporter;; Major Facilitator Superfamily	sp|Q41144|STC_RICCO Sugar carrier protein C OS=Ricinus communis OX=3988 GN=STC PE=2 SV=1	U	Intracellular trafficking, secretion, and vesicular transport	PREDICTED: sugar carrier protein C-like [Cucumis melo]
Cla97C02G030340	178	3328	4036	157	409	81	4.28998	52.3784	71.622	2.84816	5.73374	1.30632	1.78e-05	-3.83819	down	--	--	Molecular Function: nucleic acid binding (GO:0003676);; Biological Process: transcription, DNA-templated (GO:0006351);; Cellular Component: intracellular membrane-bounded organelle (GO:0043231);;	--	--	--	--	No apical meristem (NAM) protein	sp|Q10S65|NAC22_ORYSJ NAC domain-containing protein 22 OS=Oryza sativa subsp. japonica OX=39947 GN=NAC022 PE=2 SV=1	K	Transcription	PREDICTED: protein FEZ-like [Cucumis melo]
Cla97C01G019450	1096	2416	6249	1029	703	1074	16.111	23.1467	67.5008	11.3585	6.00811	10.5578	0.00079109	-2.05717	down	[T]	Signal transduction mechanisms	Biological Process: phosphate-containing compound metabolic process (GO:0006796);; Molecular Function: phosphatase activity (GO:0016791);; Molecular Function: cation binding (GO:0043169);;	K22390|0|cmo:103485096|purple acid phosphatase 5	--	[G]	Carbohydrate transport and metabolism	Calcineurin-like phosphoesterase;; Iron/zinc purple acid phosphatase-like protein C;; Purple acid Phosphatase, N-terminal domain	sp|Q9SIV9|PPA10_ARATH Purple acid phosphatase 10 OS=Arabidopsis thaliana OX=3702 GN=PAP10 PE=2 SV=1	G	Carbohydrate transport and metabolism	PREDICTED: purple acid phosphatase 5 [Cucumis melo]
Cla97C02G046040	355	636	649	233	361	170	17.524	20.4439	23.523	8.6124	10.3592	5.5919	1.31e-05	-1.43843	down	--	--	Cellular Component: intrinsic component of membrane (GO:0031224);;	--	--	[U]	Intracellular trafficking, secretion, and vesicular transport	Rab5-interacting protein (Rab5ip)	sp|Q9BUV8|RCAF1_HUMAN Respirasome Complex Assembly Factor 1 OS=Homo sapiens OX=9606 GN=RAB5IF PE=1 SV=1	U	Intracellular trafficking, secretion, and vesicular transport	Rab5-interacting [Cucumis melo var. makuwa]
Cla97C03G068130	330	4871	9171	1195	67	637	6.24046	60.1285	127.654	16.9974	0.727077	8.06218	0.00633557	-3.01669	down	[O]	Posttranslational modification, protein turnover, chaperones	Molecular Function: transferase activity, transferring alkyl or aryl (other than methyl) groups (GO:0016765);; Biological Process: heterocycle biosynthetic process (GO:0018130);;	K05953|0|cmo:103492113|nicotianamine synthase-like	--	--	--	Nicotianamine synthase protein	sp|Q9C7X5|NAS4_ARATH Probable nicotianamine synthase 4 OS=Arabidopsis thaliana OX=3702 GN=NAS4 PE=2 SV=1	S	Function unknown	PREDICTED: nicotianamine synthase-like [Cucumis melo]
Cla97C00G000110	2889	3128	2635	949	1446	1946	45.4261	32.0588	30.4479	11.2139	13.2209	20.4616	8.42e-05	-1.36132	down	[T]	Signal transduction mechanisms	Molecular Function: protein kinase activity (GO:0004672);; Cellular Component: cell-cell junction (GO:0005911);; Biological Process: cellular protein modification process (GO:0006464);; Biological Process: phosphate-containing compound metabolic process (GO:0006796);; Biological Process: cell communication (GO:0007154);; Molecular Function: purine ribonucleoside binding (GO:0032550);; Cellular Co…	--	--	[T]	Signal transduction mechanisms	Protein kinase domain;; Protein tyrosine and serine/threonine kinase;; NAF domain;; Kinase-like	sp|Q9LZW4|CIPKE_ARATH CBL-interacting serine/threonine-protein kinase 14 OS=Arabidopsis thaliana OX=3702 GN=CIPK14 PE=1 SV=1	T	Signal transduction mechanisms	CBL-interacting serine/threonine-protein kinase 14-like [Cucurbita moschata]
Cla97C09G175620	292	337	599	29	183	77	3.9445	2.96894	5.9635	0.290329	1.43428	0.69277	4.73e-05	-2.54237	down	[I]	Lipid transport and metabolism	Molecular Function: phospholipase activity (GO:0004620);; Cellular Component: plastid (GO:0009536);; Biological Process: primary metabolic process (GO:0044238);;	--	--	[I]	Lipid transport and metabolism	Lipase (class 3)	sp|O23522|PLA14_ARATH Phospholipase A1-Ibeta2, chloroplastic OS=Arabidopsis thaliana OX=3702 GN=At4g16820 PE=1 SV=2	I	Lipid transport and metabolism	PREDICTED: phospholipase A1-Ibeta2, chloroplastic [Cucumis sativus]
Cla97C11G221510	1076	5356	10445	696	1178	875	18.3176	59.4579	130.745	8.90036	11.6595	9.95745	7.95e-06	-2.90503	down	--	--	Biological Process: cellular protein modification process (GO:0006464);; Molecular Function: transferase activity, transferring hexosyl groups (GO:0016758);; Cellular Component: intrinsic component of membrane (GO:0031224);; Cellular Component: Golgi apparatus part (GO:0044431);;	K20855|0|cmo:103487555|beta-1,3-galactosyltransferase 7-like	--	[G]	Carbohydrate transport and metabolism	Galactosyltransferase;; Domain of unknown function (DUF4094)	sp|Q6NQB7|B3GT7_ARATH Beta-1,3-galactosyltransferase 7 OS=Arabidopsis thaliana OX=3702 GN=B3GALT7 PE=2 SV=1	G	Carbohydrate transport and metabolism	PREDICTED: beta-1,3-galactosyltransferase 7-like isoform X2 [Cucumis melo]
Cla97C01G000980	2800	13116	11039	1747	2639	2499	134.303	409.987	389.031	62.9403	73.581	80.1162	1.38e-06	-2.21227	down	--	--	Biological Process: cation transport (GO:0006812);; Molecular Function: cation binding (GO:0043169);;	--	--	[P]	Inorganic ion transport and metabolism	Heavy-metal-associated domain	sp|O03982|HIP39_ARATH Heavy metal-associated isoprenylated plant protein 39 OS=Arabidopsis thaliana OX=3702 GN=HIPP39 PE=2 SV=1	P	Inorganic ion transport and metabolism	PREDICTED: FK506-binding protein 4-like [Cucumis melo]
Cla97C05G104380	437	935	992	227	593	316	7.19623	10.0412	12.0149	2.80748	5.68383	3.48334	0.000237795	-1.40999	down	[O]	Posttranslational modification, protein turnover, chaperones	Biological Process: gravitropism (GO:0009630);;	--	--	[O]	Posttranslational modification, protein turnover, chaperones	DnaJ domain	sp|Q9ZSY2|DNJ15_ARATH Chaperone protein dnaJ 15 OS=Arabidopsis thaliana OX=3702 GN=ATJ15 PE=1 SV=1	O	Posttranslational modification, protein turnover, chaperones	PREDICTED: chaperone protein dnaJ 15 [Cucumis sativus]
Cla97C06G126060	1893	3275	3845	861	1982	1291	10.2049	11.5103	15.2361	3.4863	6.2146	4.65442	4.02e-06	-1.4832	down	--	--	--	K16276|0|cmo:103493963|uncharacterized LOC103493963	--	[R]	General function prediction only	Zinc-ribbon;; CHY zinc finger;; Hemerythrin HHE cation binding domain;; Ring finger domain	sp|F4HVS0|BTSL2_ARATH Zinc finger protein BRUTUS-like At1g74770 OS=Arabidopsis thaliana OX=3702 GN=At1g74770 PE=2 SV=1	O	Posttranslational modification, protein turnover, chaperones	PREDICTED: uncharacterized protein LOC103493963 [Cucumis melo]
Cla97C05G097760	1709	3074	3110	1314	1885	1201	55.8108	65.455	74.6601	32.2362	35.7901	26.2163	8.51e-07	-1.1678	down	--	--	Molecular Function: binding (GO:0005488);; Cellular Component: intrinsic component of membrane (GO:0031224);;	K23568|3.06439e-119|mcha:111009919|ER membrane protein complex subunit 7 homolog	--	[S]	Function unknown	Protein of unknown function (DUF2012)	sp|Q8VY97|Y4213_ARATH ER membrane protein complex subunit 7 homolog OS=Arabidopsis thaliana OX=3702 GN=At4g32130 PE=2 SV=1	S	Function unknown	ER membrane protein complex subunit 7 homolog [Momordica charantia]
Cla97C11G210490	260	492	69	30	55	51	17.9356	22.1239	3.49689	1.54252	2.19929	2.3216	2.37e-05	-2.90828	down	--	--	Biological Process: response to hormone (GO:0009725);;	--	--	--	--	Auxin responsive protein	sp|P33083|AX6B_SOYBN Auxin-induced protein 6B OS=Glycine max OX=3847 PE=2 SV=1	S	Function unknown	PREDICTED: auxin-responsive protein SAUR21-like [Cucumis melo]
Cla97C05G101190	250	379	177	24	162	49	7.53242	7.45341	3.92559	0.538006	2.83014	0.988785	0.000741813	-2.22657	down	--	--	Molecular Function: nucleic acid binding (GO:0003676);;	--	--	[K]	Transcription	Myb-like DNA-binding domain;; Myb-like DNA-binding domain	sp|Q9SN12|MYB77_ARATH Transcription factor MYB77 OS=Arabidopsis thaliana OX=3702 GN=MYB77 PE=1 SV=1	K	Transcription	PREDICTED: transcriptional activator Myb-like [Cucumis melo]
Cla97C09G175250	1402	2700	2556	895	1259	1293	45.3394	56.9223	60.7604	21.7558	23.6712	27.9668	3.08e-07	-1.25611	down	[R]	General function prediction only	Molecular Function: catalytic activity (GO:0003824);; Molecular Function: purine ribonucleoside binding (GO:0032550);; Biological Process: intracellular signal transduction (GO:0035556);; Cellular Component: cell part (GO:0044464);;	K07893|1.43904e-150|cmax:111491433|ras-related protein RABH1b	--	[U]	Intracellular trafficking, secretion, and vesicular transport	Ras family;; Ras of Complex, Roc, domain of DAPkinase;; ADP-ribosylation factor family;; Elongation factor Tu GTP binding domain;; Signal recognition particle receptor beta subunit;; Gtr1/RagA G protein conserved region;; 50S ribosome-binding GTPase	sp|O80501|RAH1B_ARATH Ras-related protein RABH1b OS=Arabidopsis thaliana OX=3702 GN=RABH1B PE=1 SV=1	U	Intracellular trafficking, secretion, and vesicular transport	ras-related protein RABH1b [Cucurbita maxima]
Cla97C01G022990	923	8587	14171	876	1466	1535	44.2597	268.414	499.427	31.5642	40.866	49.224	0.000109452	-2.86393	down	--	--	Molecular Function: nucleic acid binding transcription factor activity (GO:0001071);; Molecular Function: nucleic acid binding (GO:0003676);; Biological Process: transcription, DNA-templated (GO:0006351);; Molecular Function: cation binding (GO:0043169);; Cellular Component: intracellular membrane-bounded organelle (GO:0043231);; Biological Process: reproductive shoot system development (GO:00905…	--	--	--	--	SBP domain	sp|Q38741|SBP1_ANTMA Squamosa promoter-binding protein 1 OS=Antirrhinum majus OX=4151 GN=SBP1 PE=2 SV=1	K	Transcription	PREDICTED: squamosa promoter-binding protein 1 [Cucumis sativus]
Cla97C08G149310	220	1699	1841	92	268	175	14.2851	71.9941	87.9266	4.4664	10.1167	7.59832	4.18e-06	-3.09358	down	--	--	--	--	--	--	--	--	sp|P16273|PRPX_HORVU Pathogen-related protein OS=Hordeum vulgare OX=4513 PE=2 SV=2	S	Function unknown	pathogen-related protein-like isoform X1 [Cucurbita moschata]
Cla97C02G028780	1525	3244	3801	997	1227	1279	30.3225	42.0489	55.5544	14.8888	14.1816	16.9982	8.55e-07	-1.58231	down	[O]	Posttranslational modification, protein turnover, chaperones	Molecular Function: protein binding (GO:0005515);; Biological Process: cellular process (GO:0009987);;	K09510|0|mcha:111007642|dnaJ homolog subfamily B member 1-like	--	[O]	Posttranslational modification, protein turnover, chaperones	DnaJ C terminal domain;; DnaJ domain	sp|Q80Y75|DJB13_MOUSE DnaJ homolog subfamily B member 13 OS=Mus musculus OX=10090 GN=Dnajb13 PE=1 SV=1	O	Posttranslational modification, protein turnover, chaperones	dnaJ homolog subfamily B member 1-like [Momordica charantia]
Cla97C08G148710	119	300	673	116	177	78	4.37175	7.1742	18.1503	3.18159	3.76491	1.91235	0.00295061	-1.87997	down	[U]	Intracellular trafficking, secretion, and vesicular transport	Biological Process: protein metabolic process (GO:0019538);; Cellular Component: intrinsic component of membrane (GO:0031224);; Molecular Function: peptidase activity, acting on L-amino acid peptides (GO:0070011);;	K03100|3.34461e-105|cmax:111487833|chloroplast processing peptidase-like	Protein export (ko03060)	[O]	Posttranslational modification, protein turnover, chaperones	Signal peptidase, peptidase S26	sp|Q8H0W1|PLSP1_ARATH Chloroplast processing peptidase OS=Arabidopsis thaliana OX=3702 GN=PLSP1 PE=2 SV=2	O	Posttranslational modification, protein turnover, chaperones	chloroplast processing peptidase-like [Cucurbita maxima]
Cla97C09G175530	1625	2368	4015	1547	1498	1245	44.1161	41.9148	80.1126	31.5627	23.648	22.6076	0.00148422	-1.2124	down	--	--	Biological Process: apoptotic process (GO:0006915);; Cellular Component: intrinsic component of membrane (GO:0031224);;	--	--	[V]	Defense mechanisms	Inhibitor of apoptosis-promoting Bax1	sp|Q9LD45|BI1_ARATH Bax inhibitor 1 OS=Arabidopsis thaliana OX=3702 GN=BI-1 PE=1 SV=1	V	Defense mechanisms	bax inhibitor 1-like [Momordica charantia]
Cla97C09G162080	442	1646	3011	456	896	293	11.7515	28.5598	58.9068	9.10466	13.8578	5.21022	0.00222291	-1.95731	down	--	--	Molecular Function: hydrolase activity (GO:0016787);;	K14497|3.11506e-103|mcha:111016894|probable protein phosphatase 2C 6	MAPK signaling pathway - plant (ko04016);; Plant hormone signal transduction (ko04075)	[T]	Signal transduction mechanisms	Protein phosphatase 2C	sp|Q9LNP9|P2C07_ARATH Protein phosphatase 2C 7 OS=Arabidopsis thaliana OX=3702 GN=HAB2 PE=1 SV=2	T	Signal transduction mechanisms	probable protein phosphatase 2C 6 [Momordica charantia]
Cla97C01G017940	960	5281	6241	622	1242	659	16.3068	58.4814	77.9234	7.94045	12.2679	7.48237	6.4e-06	-2.5889	down	--	--	Cellular Component: intrinsic component of membrane (GO:0031224);; Molecular Function: transition metal ion binding (GO:0046914);;	--	--	[O]	Posttranslational modification, protein turnover, chaperones	Ring finger domain;; RING-like zinc finger;; RING-H2 zinc finger domain;; Zinc finger, C3HC4 type (RING finger);; Zinc finger, C3HC4 type (RING finger);; Anaphase-promoting complex subunit 11 RING-H2 finger	sp|Q9LX93|ATL55_ARATH E3 ubiquitin-protein ligase RING1 OS=Arabidopsis thaliana OX=3702 GN=ATL55 PE=1 SV=1	O	Posttranslational modification, protein turnover, chaperones	PREDICTED: E3 ubiquitin-protein ligase RING1-like [Cucumis sativus]
Cla97C06G121290	1443	6109	12130	1432	3035	1729	5.94225	16.3972	36.7093	4.4319	7.26562	4.76017	0.00175722	-1.98209	down	[L]	Replication, recombination and repair	Molecular Function: nucleic acid binding (GO:0003676);; Biological Process: gene expression (GO:0010467);; Molecular Function: endoribonuclease activity, producing 5'-phosphomonoesters (GO:0016891);; Molecular Function: nucleoside-triphosphatase activity (GO:0017111);; Molecular Function: purine ribonucleoside binding (GO:0032550);; Biological Process: RNA phosphodiester bond hydrolysis (GO:00905…	K11592|0|csv:101203337|dicer-like protein 4 isoform X1	--	[A]	RNA processing and modification	Ribonuclease III domain;; Ribonuclease-III-like;; Dicer dimerisation domain;; Helicase conserved C-terminal domain;; double strand RNA binding domain from DEAD END PROTEIN 1;; DEAD/DEAH box helicase;; Type III restriction enzyme, res subunit;; Double-stranded RNA binding motif;; PAZ domain	sp|P84634|DCL4_ARATH Dicer-like protein 4 OS=Arabidopsis thaliana OX=3702 GN=DCL4 PE=1 SV=2	A	RNA processing and modification	PREDICTED: dicer-like protein 4 isoform X2 [Cucumis sativus]
Cla97C10G195860	312	346	422	17	78	11	6.38322	4.61949	6.35069	0.256262	0.929229	0.147902	1.46e-08	-3.82698	down	[M]	Cell wall/membrane/envelope biogenesis	--	K09753|0|cmo:103500289|cinnamoyl-CoA reductase 2-like	Phenylpropanoid biosynthesis (ko00940)	[V]	Defense mechanisms	NAD dependent epimerase/dehydratase family;; 3-beta hydroxysteroid dehydrogenase/isomerase family;; NAD(P)H-binding;; GDP-mannose 4,6 dehydratase;; NmrA-like family;; Male sterility protein;; Polysaccharide biosynthesis protein;; KR domain	sp|Q9S9N9|CCR1_ARATH Cinnamoyl-CoA reductase 1 OS=Arabidopsis thaliana OX=3702 GN=CCR1 PE=1 SV=1	V	Defense mechanisms	PREDICTED: cinnamoyl-CoA reductase 2-like [Cucumis melo]
Cla97C07G144500	196	391	1004	113	311	75	4.60299	6.00388	17.3734	1.98905	4.24883	1.1683	0.00292839	-2.0661	down	--	--	Cellular Component: chromosome (GO:0005694);; Biological Process: chromosome organization (GO:0051276);;	K06674|1.73741e-75|cpep:111810702|structural maintenance of chromosomes protein 2-1	--	[BD]	Chromatin structure and dynamics;; Cell cycle control, cell division, chromosome partitioning	--	sp|Q9SN90|SMC22_ARATH Structural maintenance of chromosomes protein 2-2 OS=Arabidopsis thaliana OX=3702 GN=SMC2-2 PE=2 SV=1	BD	Chromatin structure and dynamics;; Cell cycle control, cell division, chromosome partitioning	structural maintenance of chromosomes protein 2-1-like isoform X2 [Momordica charantia]
Cla97C04G078030	765	5405	17557	216	1447	403	52.2459	240.602	881.281	11.0684	57.4476	18.4038	3.01e-05	-3.92716	down	--	--	--	--	--	--	--	--	--	--	--	hypothetical protein Csa_013670 [Cucumis sativus]
Cla97C01G024350	444	1887	1614	137	494	227	2.59549	7.18689	6.92972	0.600191	1.67866	0.886527	3.59e-06	-2.52198	down	[K]	Transcription	Biological Process: cellular protein modification process (GO:0006464);; Biological Process: phosphate-containing compound metabolic process (GO:0006796);; Biological Process: endocytosis (GO:0006897);; Biological Process: defense response (GO:0006952);; Biological Process: response to bacterium (GO:0009617);; Cellular Component: endomembrane system (GO:0012505);; Molecular Function: kinase activ…	K13420|0|csv:101215973|LRR receptor-like serine/threonine-protein kinase FLS2	MAPK signaling pathway - plant (ko04016);; Plant-pathogen interaction (ko04626)	--	--	Leucine rich repeat;; Protein kinase domain;; Protein tyrosine and serine/threonine kinase;; Leucine Rich repeats (2 copies);; Leucine Rich Repeat;; Leucine rich repeat N-terminal domain	sp|Q9FL28|FLS2_ARATH LRR receptor-like serine/threonine-protein kinase FLS2 OS=Arabidopsis thaliana OX=3702 GN=FLS2 PE=1 SV=1	T	Signal transduction mechanisms	LRR receptor-like serine/threonine-protein kinase FLS2 [Cucumis melo var. makuwa]
Cla97C05G084620	888	2437	2860	1049	1398	904	27.5329	49.2692	65.1821	24.4404	25.2087	18.7317	0.00272938	-1.1712	down	--	--	--	--	--	--	--	--	--	317		PREDICTED: uncharacterized protein LOC101203442 [Cucumis sativus]
Cla97C07G131200	256	1373	554	225	322	316	7.29371	25.5308	11.6008	4.80893	5.32898	6.02871	0.00187369	-1.54357	down	--	--	--	--	--	--	--	--	--	300		PREDICTED: uncharacterized protein LOC103495510 [Cucumis melo]
Cla97C02G036310	1497	2703	2310	545	1185	376	68.4028	80.4989	77.5558	18.7116	31.4623	11.4584	3.46e-07	-1.99684	down	--	--	Molecular Function: disulfide oxidoreductase activity (GO:0015036);; Biological Process: cellular homeostasis (GO:0019725);; Biological Process: single-organism metabolic process (GO:0044710);;	--	--	[O]	Posttranslational modification, protein turnover, chaperones	Glutaredoxin	sp|Q9SGP6|GRXC9_ARATH Glutaredoxin-C9 OS=Arabidopsis thaliana OX=3702 GN=GRXC9 PE=1 SV=1	O	Posttranslational modification, protein turnover, chaperones	PREDICTED: glutaredoxin-C9-like [Cucumis melo]
Cla97C03G057190	155	193	203	9	47	35	3.35202	2.72231	3.24065	0.139881	0.584958	0.500183	1.16e-07	-3.00953	down	[HR]	Coenzyme transport and metabolism;; General function prediction only	--	--	--	[I]	Lipid transport and metabolism	alpha/beta hydrolase fold;; Alpha/beta hydrolase family;; Serine aminopeptidase, S33	sp|P34913|HYES_HUMAN Bifunctional epoxide hydrolase 2 OS=Homo sapiens OX=9606 GN=EPHX2 PE=1 SV=2	I	Lipid transport and metabolism	uncharacterized protein LOC111010895, partial [Momordica charantia]
Cla97C11G223450	207	682	398	7	46	28	2.92522	6.29392	4.13696	0.06556	0.372155	0.264495	1.47e-12	-4.3176	down	[U]	Intracellular trafficking, secretion, and vesicular transport	Biological Process: protein localization (GO:0008104);; Cellular Component: intrinsic component of membrane (GO:0031224);;	K10956|0|cmo:103501823|protein transport protein Sec61 subunit alpha-like	Protein export (ko03060);; Protein processing in endoplasmic reticulum (ko04141);; Phagosome (ko04145)	[UO]	Intracellular trafficking, secretion, and vesicular transport;; Posttranslational modification, protein turnover, chaperones	SecY translocase;; Plug domain of Sec61p	sp|Q54XK2|SC61A_DICDI Protein transport protein Sec61 subunit alpha OS=Dictyostelium discoideum OX=44689 GN=sec61a PE=3 SV=1	OU	Posttranslational modification, protein turnover, chaperones;; Intracellular trafficking, secretion, and vesicular transport	PREDICTED: protein transport protein Sec61 subunit alpha-like [Cucumis melo]
Cla97C08G158740	250	1185	456	128	147	225	7.86997	24.3977	10.5796	3.02331	2.69448	4.73585	5.51e-05	-2.11011	down	[FV]	Nucleotide transport and metabolism;; Defense mechanisms	Biological Process: pyrimidine deoxyribonucleoside triphosphate metabolic process (GO:0009211);; Molecular Function: nucleoside-triphosphate diphosphatase activity (GO:0047429);;	K01520|5.30552e-121|cmo:103487963|deoxyuridine 5'-triphosphate nucleotidohydrolase	Pyrimidine metabolism (ko00240)	[F]	Nucleotide transport and metabolism	dUTPase	sp|Q9STG6|DUT_ARATH Deoxyuridine 5&apos;-triphosphate nucleotidohydrolase OS=Arabidopsis thaliana OX=3702 GN=DUT PE=1 SV=1	F	Nucleotide transport and metabolism	PREDICTED: deoxyuridine 5&apos;-triphosphate nucleotidohydrolase [Cucumis melo]
Cla97C10G206280	244	667	1022	50	238	91	8.21965	14.6932	25.3871	1.26003	4.65985	2.05495	1.38e-05	-2.73436	down	--	--	Molecular Function: metal ion binding (GO:0046872);;	K13448|7.69273e-94|cmo:103486221|calcium-binding allergen Bet v 3	Plant-pathogen interaction (ko04626)	[T]	Signal transduction mechanisms	EF hand;; EF-hand domain;; EF-hand domain pair;; EF hand;; EF-hand domain pair;; Secreted protein acidic and rich in cysteine Ca binding region;; Dockerin type I domain	sp|P43187|ALLB3_BETPN Calcium-binding allergen Bet v 3 OS=Betula pendula OX=3505 GN=BETVIII PE=1 SV=1	T	Signal transduction mechanisms	PREDICTED: calcium-binding allergen Bet v 3 [Cucumis melo]
Cla97C06G119850	2036	4716	4443	2100	3180	1397	39.2152	59.2168	62.9022	30.4045	35.6179	17.9949	0.00279339	-1.05804	down	[QR]	Secondary metabolites biosynthesis, transport and catabolism;; General function prediction only	--	--	--	[R]	General function prediction only	Zinc-binding dehydrogenase;; N-terminal domain of oxidoreductase;; Zinc-binding dehydrogenase	sp|Q39172|AER_ARATH NADPH-dependent oxidoreductase 2-alkenal reductase OS=Arabidopsis thaliana OX=3702 GN=AER PE=1 SV=1	S	Function unknown	2-alkenal reductase (NADP(+)-dependent)-like [Momordica charantia]
Cla97C09G172570	208	213	83	11	87	32	3.68027	2.46058	1.06963	0.144949	0.896764	0.373906	0.00136917	-2.45225	down	[R]	General function prediction only	Molecular Function: oxidoreductase activity, acting on the CH-OH group of donors, NAD or NADP as acceptor (GO:0016616);; Biological Process: single-organism metabolic process (GO:0044710);; Molecular Function: transition metal ion binding (GO:0046914);;	K18857|0|csv:101206036|alcohol dehydrogenase class-P	Glycolysis / Gluconeogenesis (ko00010);; Fatty acid degradation (ko00071);; Tyrosine metabolism (ko00350);; alpha-Linolenic acid metabolism (ko00592);; Pyruvate metabolism (ko00620)	[Q]	Secondary metabolites biosynthesis, transport and catabolism	Zinc-binding dehydrogenase;; Alcohol dehydrogenase GroES-like domain	sp|P12886|ADH1_PEA Alcohol dehydrogenase 1 OS=Pisum sativum OX=3888 PE=1 SV=1	Q	Secondary metabolites biosynthesis, transport and catabolism	alcohol dehydrogenase [Citrullus lanatus]
Cla97C03G067590	17122	26310	33918	686	1025	832	165.434	165.663	240.79	4.97836	5.75336	5.37317	2.41e-87	-5.26426	down	[O]	Posttranslational modification, protein turnover, chaperones	Molecular Function: protein binding (GO:0005515);; Biological Process: cellular process (GO:0009987);; Molecular Function: purine ribonucleoside binding (GO:0032550);; Biological Process: response to stimulus (GO:0050896);;	K04079|0|csv:101207890|heat shock cognate protein 80	Protein processing in endoplasmic reticulum (ko04141);; Plant-pathogen interaction (ko04626)	[O]	Posttranslational modification, protein turnover, chaperones	Hsp90 protein;; Histidine kinase-, DNA gyrase B-, and HSP90-like ATPase;; Histidine kinase-, DNA gyrase B-, and HSP90-like ATPase	sp|P36181|HSP80_SOLLC Heat shock cognate protein 80 OS=Solanum lycopersicum OX=4081 GN=HSC80 PE=2 SV=1	O	Posttranslational modification, protein turnover, chaperones	PREDICTED: heat shock cognate protein 80-like [Cucumis sativus]
Cla97C11G216140	538	982	6012	493	1004	617	11.3299	13.4773	93.0593	7.7929	12.2897	8.67798	0.00646788	-2.19184	down	--	--	--	--	--	--	--	Phloem protein 2;; F-box domain;; F-box-like	sp|Q3E6P4|FB95_ARATH F-box protein At2g02240 OS=Arabidopsis thaliana OX=3702 GN=At2g02240 PE=2 SV=1	S	Function unknown	PREDICTED: F-box protein PP2-B10-like [Cucumis melo]
Cla97C02G040470	151	465	754	55	283	124	8.71158	17.5029	31.9834	2.379	9.50042	4.76349	0.00386298	-1.94519	down	--	--	Biological Process: regulation of response to biotic stimulus (GO:0002831);;	--	--	--	--	NPR1 interacting	--	S	Function unknown	hypothetical protein Csa_021295 [Cucumis sativus]
Cla97C02G043700	292	717	357	43	210	227	7.76539	12.4402	6.96939	0.844775	3.23913	4.02921	0.00230271	-1.8317	down	--	--	Molecular Function: protein binding (GO:0005515);;	--	--	--	--	Helix-loop-helix DNA-binding domain	sp|Q9S7Y1|BH030_ARATH Transcription factor bHLH30 OS=Arabidopsis thaliana OX=3702 GN=BHLH30 PE=1 SV=1	K	Transcription	transcription factor bHLH30-like isoform X1 [Cucumis melo var. makuwa]
Cla97C07G133330	1618	2810	5947	1327	1381	1214	62.1698	70.3511	167.892	38.306	30.8444	31.1861	0.000286145	-1.70692	down	--	--	Molecular Function: nucleic acid binding (GO:0003676);; Biological Process: transcription, DNA-templated (GO:0006351);; Cellular Component: intracellular membrane-bounded organelle (GO:0043231);; Molecular Function: transition metal ion binding (GO:0046914);;	--	--	--	--	GATA-type transcription activator, N-terminal	--	285		PREDICTED: uncharacterized protein LOC101211273 [Cucumis sativus]
Cla97C05G096400	343	862	1080	283	464	444	5.89288	9.66353	13.6497	3.64783	4.63866	5.10085	0.00236231	-1.23918	down	--	--	Molecular Function: catalytic activity (GO:0003824);;	--	--	--	--	Protein of unknown function (DUF295);; F-box-like;; F-box domain	sp|Q3EBZ2|SKI23_ARATH F-box protein SKIP23 OS=Arabidopsis thaliana OX=3702 GN=SKIP23 PE=1 SV=1	S	Function unknown	PREDICTED: F-box protein SKIP23-like [Cucumis melo]
Cla97C11G210050	1588	2503	4156	1731	1644	1548	39.0371	40.1031	75.0893	31.9758	23.503	25.4504	0.00629532	-1.04702	down	[M]	Cell wall/membrane/envelope biogenesis	Biological Process: establishment of localization (GO:0051234);;	K03098|6.47674e-124|csv:101214871|temperature-induced lipocalin-1	--	[M]	Cell wall/membrane/envelope biogenesis	Lipocalin-like domain;; Lipocalin / cytosolic fatty-acid binding protein family	sp|Q9FGT8|TIL_ARATH Temperature-induced lipocalin-1 OS=Arabidopsis thaliana OX=3702 GN=TIL PE=1 SV=1	M	Cell wall/membrane/envelope biogenesis	PREDICTED: apolipoprotein D-like [Cucumis sativus]
Cla97C09G173550	4187	4461	11842	2335	3209	1031	250.562	174.006	520.773	105.005	111.654	41.2384	0.00031826	-2.0136	down	[J]	Translation, ribosomal structure and biogenesis	Biological Process: translation (GO:0006412);; Molecular Function: translation factor activity, RNA binding (GO:0008135);;	K03113|7.80081e-74|csv:101202908|protein translation factor SUI1 homolog 1	RNA transport (ko03013)	[J]	Translation, ribosomal structure and biogenesis	Translation initiation factor SUI1	sp|P41568|SUI11_ARATH Protein translation factor SUI1 homolog 1 OS=Arabidopsis thaliana OX=3702 GN=At4g27130 PE=1 SV=2	J	Translation, ribosomal structure and biogenesis	SUI1 domain-containing protein [Cucumis melo var. makuwa]
Cla97C11G211060	795	2438	2322	104	330	137	17.3977	34.7637	37.342	1.70988	4.19689	2.00217	3.3e-14	-3.62344	down	[R]	General function prediction only	--	K23050|0|cmo:103499680|isoflavone reductase-like protein	--	--	--	NmrA-like family;; NAD(P)H-binding;; NAD dependent epimerase/dehydratase family;; 3-beta hydroxysteroid dehydrogenase/isomerase family	sp|O81355|PYRC5_PYRCO Phenylcoumaran benzylic ether reductase Pyrc5 OS=Pyrus communis OX=23211 GN=PYRC5 PE=1 SV=1	S	Function unknown	PREDICTED: isoflavone reductase-like protein [Cucumis melo]
Cla97C06G112650	322	616	1383	231	475	235	12.4311	15.5089	39.2518	6.68942	10.6587	6.06604	0.00242424	-1.6591	down	--	--	--	--	--	--	--	Auxin responsive protein	sp|O22150|SAU36_ARATH Auxin-responsive protein SAUR36 OS=Arabidopsis thaliana OX=3702 GN=SAUR36 PE=2 SV=1	S	Function unknown	PREDICTED: auxin-responsive protein SAUR36-like [Cucumis melo]
Cla97C09G164910	209	480	1235	194	218	160	12.6812	19.0295	55.2746	8.84319	7.72189	6.49404	0.000821544	-2.04787	down	--	--	--	--	--	--	--	Domain of unknown function (DUF4666)	sp|Q9XI29|Y1540_ARATH Uncharacterized protein At1g15400 OS=Arabidopsis thaliana OX=3702 GN=At1g15400 PE=1 SV=2	S	Function unknown	hypothetical protein Csa_015766 [Cucumis sativus]
Cla97C05G086280	404	568	1684	261	419	157	14.5194	13.3162	44.5001	7.04216	8.76201	3.76651	0.000841466	-2.02987	down	--	--	Cellular Component: intrinsic component of membrane (GO:0031224);;	--	--	--	--	--	--	S	Function unknown	PREDICTED: uncharacterized protein LOC101205778 [Cucumis sativus]
Cla97C10G197390	833	2649	2941	457	1306	667	9.55594	19.8166	24.8114	3.94172	8.71446	5.11885	0.000271042	-1.73382	down	--	--	Molecular Function: catalytic activity (GO:0003824);; Biological Process: primary metabolic process (GO:0044238);;	--	--	--	--	Enhanced disease susceptibility 1 protein EP domain;; Lipase (class 3)	sp|Q4F883|SG101_ARATH Senescence-associated carboxylesterase 101 OS=Arabidopsis thaliana OX=3702 GN=SAG101 PE=1 SV=1	S	Function unknown	PREDICTED: senescence-associated carboxylesterase 101 [Cucumis melo]
Cla97C04G075670	1065	2111	2206	901	1221	976	19.5684	25.2827	29.7766	12.4317	13.0391	11.9844	1.36e-05	-1.10465	down	--	--	--	K19944|0|csv:101215120|EVI5-like protein	--	[R]	General function prediction only	Rab-GTPase-TBC domain	sp|Q96CN4|EVI5L_HUMAN EVI5-like protein OS=Homo sapiens OX=9606 GN=EVI5L PE=1 SV=1	S	Function unknown	PREDICTED: EVI5-like protein [Cucumis sativus]
Cla97C06G123140	170	279	361	91	221	125	1.12376	1.20022	1.75391	0.449377	0.848195	0.549189	0.00173083	-1.25983	down	--	--	Biological Process: macromolecule metabolic process (GO:0043170);;	--	--	[O]	Posttranslational modification, protein turnover, chaperones	--	sp|Q9SZR3|SMXL4_ARATH Protein SMAX1-LIKE 4 OS=Arabidopsis thaliana OX=3702 GN=SMXL4 PE=1 SV=1	O	Posttranslational modification, protein turnover, chaperones	PREDICTED: uncharacterized protein LOC101213124 [Cucumis sativus]
Cla97C07G142920	3244	10244	14827	2422	4066	4248	24.2169	49.8329	81.3264	13.5809	17.6454	21.2002	0.000567605	-1.6858	down	[T]	Signal transduction mechanisms	Molecular Function: protein kinase activity (GO:0004672);; Biological Process: cellular protein modification process (GO:0006464);; Cellular Component: intrinsic component of membrane (GO:0031224);; Molecular Function: purine ribonucleoside binding (GO:0032550);;	--	--	[T]	Signal transduction mechanisms	Protein tyrosine and serine/threonine kinase;; Protein kinase domain;; Malectin-like domain;; Malectin domain	sp|Q9SCZ4|FERON_ARATH Receptor-like protein kinase FERONIA OS=Arabidopsis thaliana OX=3702 GN=FER PE=1 SV=1	T	Signal transduction mechanisms	PREDICTED: receptor-like protein kinase FERONIA [Cucumis melo]
Cla97C04G071440	10201	16765	13681	6698	9500	8031	270.555	289.776	266.616	133.489	146.485	142.401	2.63e-17	-1.07252	down	[G]	Carbohydrate transport and metabolism	Biological Process: pyruvate metabolic process (GO:0006090);; Molecular Function: intramolecular oxidoreductase activity, interconverting aldoses and ketoses (GO:0016861);;	K01803|1.37776e-179|cmo:103486035|triosephosphate isomerase, cytosolic	Glycolysis / Gluconeogenesis (ko00010);; Fructose and mannose metabolism (ko00051);; Inositol phosphate metabolism (ko00562);; Carbon fixation in photosynthetic organisms (ko00710);; Carbon metabolism (ko01200);; Biosynthesis of amino acids (ko01230)	[G]	Carbohydrate transport and metabolism	Triosephosphate isomerase	sp|P48491|TPIS_ARATH Triosephosphate isomerase, cytosolic OS=Arabidopsis thaliana OX=3702 GN=CTIMC PE=1 SV=2	G	Carbohydrate transport and metabolism	PREDICTED: triosephosphate isomerase, cytosolic [Cucumis melo]
Cla97C02G029430	2252	4742	9678	2084	3700	2263	43.1428	59.2036	136.244	29.9958	41.2028	28.9818	0.00501658	-1.38569	down	[V]	Defense mechanisms	Molecular Function: catalytic activity (GO:0003824);;	--	--	[T]	Signal transduction mechanisms	Nudix hydrolase domain;; NUDIX domain	sp|Q9SU14|NUDT7_ARATH Nudix hydrolase 7 OS=Arabidopsis thaliana OX=3702 GN=NUDT7 PE=1 SV=1	T	Signal transduction mechanisms	PREDICTED: nudix hydrolase 7-like isoform X2 [Cucumis melo]
Cla97C07G142940	7877	23844	26501	5946	12623	11747	60.7412	119.835	150.163	34.4551	56.5913	60.5653	0.00400674	-1.23949	down	[T]	Signal transduction mechanisms	Molecular Function: protein kinase activity (GO:0004672);; Cellular Component: membrane (GO:0016020);;	--	--	[T]	Signal transduction mechanisms	Protein tyrosine and serine/threonine kinase;; Protein kinase domain;; Malectin-like domain;; Malectin domain	sp|Q9SCZ4|FERON_ARATH Receptor-like protein kinase FERONIA OS=Arabidopsis thaliana OX=3702 GN=FER PE=1 SV=1	T	Signal transduction mechanisms	PREDICTED: receptor-like protein kinase FERONIA [Cucumis melo]
Cla97C10G205250	1578	3927	3725	156	873	489	14.2642	23.1393	24.7453	1.0566	4.58856	2.95079	3.51e-08	-2.9754	down	[K]	Transcription	Molecular Function: kinase activity (GO:0016301);;	--	--	--	--	Protein kinase domain;; Protein tyrosine and serine/threonine kinase;; Leucine rich repeat;; Leucine Rich repeats (2 copies);; Leucine Rich Repeat	sp|C0LGP4|Y3475_ARATH Probable LRR receptor-like serine/threonine-protein kinase At3g47570 OS=Arabidopsis thaliana OX=3702 GN=At3g47570 PE=2 SV=1	T	Signal transduction mechanisms	uncharacterized protein LOC111791563 [Cucurbita pepo subsp. pepo]
Cla97C01G014510	628	1131	1340	410	827	446	10.3756	12.1817	16.2739	5.08924	7.94661	4.92062	0.000198165	-1.23327	down	[D]	Cell cycle control, cell division, chromosome partitioning	Molecular Function: ubiquitin-like protein transferase activity (GO:0019787);; Biological Process: protein modification by small protein conjugation (GO:0032446);;	--	--	--	--	U-box domain	sp|Q9FLF4|PUB27_ARATH U-box domain-containing protein 27 OS=Arabidopsis thaliana OX=3702 GN=PUB27 PE=2 SV=1	H	Coenzyme transport and metabolism	U-box domain-containing protein 27-like [Cucurbita maxima]
Cla97C01G020680	1206	4671	6187	682	1836	738	35.2872	89.1133	133.087	14.9966	31.2466	14.431	7.05e-05	-2.21958	down	--	--	--	K19307|2.10722e-146|csv:101214213|uncharacterized protein At4g26485	--	[S]	Function unknown	Domain of unknown function (DUF2431)	sp|F4I1X0|HIP41_ARATH Heavy metal-associated isoprenylated plant protein 41 OS=Arabidopsis thaliana OX=3702 GN=HIPP41 PE=3 SV=1	S	Function unknown	PREDICTED: uncharacterized protein At4g26485-like isoform X2 [Cucumis melo]
Cla97C07G140210	487	1048	1543	124	225	159	24.9143	34.9797	58.0589	4.77206	6.69636	5.43886	2.23e-12	-2.92516	down	--	--	Molecular Function: cytoskeletal protein binding (GO:0008092);; Cellular Component: intracellular non-membrane-bounded organelle (GO:0043232);;	K05759|1.02878e-88|cmo:103489979|profilin-like	--	[Z]	Cytoskeleton	Profilin	sp|Q9XF38|PROF_PYRCO Profilin OS=Pyrus communis OX=23211 PE=1 SV=1	Z	Cytoskeleton	PREDICTED: profilin-like [Cucumis melo]
Cla97C06G125400	668	2063	2828	482	807	634	14.5528	29.3259	45.3316	7.90024	10.2321	9.23715	7.6e-05	-1.82568	down	--	--	--	K18211|0|cmos:111429687|putative SNAP25 homologous protein SNAP30	--	[U]	Intracellular trafficking, secretion, and vesicular transport	--	sp|Q9S7P9|SNP33_ARATH SNAP25 homologous protein SNAP33 OS=Arabidopsis thaliana OX=3702 GN=SNAP33 PE=1 SV=1	U	Intracellular trafficking, secretion, and vesicular transport	putative SNAP25 homologous protein SNAP30 [Cucurbita moschata]
Cla97C06G126290	126	406	1602	84	206	24	11.9894	25.1444	112.126	5.99213	11.3604	1.52474	0.000802542	-3.14901	down	--	--	--	--	--	[L]	Replication, recombination and repair	--	--	L	Replication, recombination and repair	uncharacterized protein LOC111780400 [Cucurbita pepo subsp. pepo]
Cla97C02G042980	798	1884	2699	630	1177	753	10.5118	16.1825	26.1412	6.23428	9.02052	6.63319	0.000818787	-1.39614	down	--	--	Biological Process: phosphate-containing compound metabolic process (GO:0006796);; Biological Process: G-protein coupled receptor signaling pathway (GO:0007186);; Molecular Function: kinase activity (GO:0016301);; Molecular Function: purine ribonucleoside binding (GO:0032550);;	K00901|0|csv:101210099|diacylglycerol kinase 5	Glycerolipid metabolism (ko00561);; Glycerophospholipid metabolism (ko00564);; Phosphatidylinositol signaling system (ko04070)	[IT]	Lipid transport and metabolism;; Signal transduction mechanisms	Diacylglycerol kinase accessory domain;; Diacylglycerol kinase catalytic domain	sp|Q9C5E5|DGK5_ARATH Diacylglycerol kinase 5 OS=Arabidopsis thaliana OX=3702 GN=DGK5 PE=2 SV=1	IT	Lipid transport and metabolism;; Signal transduction mechanisms	PREDICTED: diacylglycerol kinase 5-like [Cucumis sativus]
Cla97C05G106140	764	1410	2669	749	895	807	32.2766	38.8403	82.8822	23.7887	21.9706	22.7838	0.00363685	-1.29032	down	--	--	--	--	--	--	--	cAMP-regulated phosphoprotein/endosulfine conserved region	--	S	Function unknown	PREDICTED: uncharacterized protein LOC101217483 isoform X2 [Cucumis sativus]
Cla97C04G075140	3243	5590	6759	2678	4382	2560	101.065	113.539	154.773	62.7135	79.3889	53.345	0.00035213	-1.0374	down	[R]	General function prediction only	Molecular Function: catalytic activity (GO:0003824);; Molecular Function: purine ribonucleoside binding (GO:0032550);; Biological Process: intracellular signal transduction (GO:0035556);; Cellular Component: cell part (GO:0044464);;	--	--	[TU]	Signal transduction mechanisms;; Intracellular trafficking, secretion, and vesicular transport	Ras family;; Ras of Complex, Roc, domain of DAPkinase;; ADP-ribosylation factor family;; 50S ribosome-binding GTPase;; Gtr1/RagA G protein conserved region	sp|O24466|RAE1A_ARATH Ras-related protein RABE1a OS=Arabidopsis thaliana OX=3702 GN=RABE1A PE=1 SV=1	U	Intracellular trafficking, secretion, and vesicular transport	ras-related protein RABE1c [Pistacia vera]
Cla97C02G027890	59	85	456	19	56	27	1.11411	1.03934	6.34079	0.260512	0.616722	0.32984	0.00058959	-2.95011	down	--	--	--	--	--	--	--	Chloroplast import apparatus Tic20-like	sp|Q9ZQZ9|TI204_ARATH Protein TIC 20-IV, chloroplastic OS=Arabidopsis thaliana OX=3702 GN=TIC20-IV PE=2 SV=1	S	Function unknown	PREDICTED: protein TIC 20-IV, chloroplastic [Cucumis sativus]
Cla97C10G204730	177	799	889	49	166	95	1.4738	4.33659	5.43896	0.306513	0.800965	0.527345	1.34e-06	-2.90363	down	[T]	Signal transduction mechanisms	Molecular Function: protein kinase activity (GO:0004672);; Biological Process: cellular protein modification process (GO:0006464);; Biological Process: phosphate-containing compound metabolic process (GO:0006796);; Biological Process: cell recognition (GO:0008037);; Cellular Component: intrinsic component of membrane (GO:0031224);; Molecular Function: purine ribonucleoside binding (GO:0032550);;	--	--	--	--	Protein kinase domain;; Protein tyrosine and serine/threonine kinase;; D-mannose binding lectin;; S-locus glycoprotein domain	sp|P17801|KPRO_MAIZE Putative receptor protein kinase ZmPK1 OS=Zea mays OX=4577 GN=PK1 PE=2 SV=2	T	Signal transduction mechanisms	PREDICTED: putative receptor protein kinase ZmPK1 [Cucumis sativus]
Cla97C08G157520	180	361	282	78	201	130	2.83402	3.71211	3.26716	0.920183	1.83929	1.37344	0.000157226	-1.35489	down	[E]	Amino acid transport and metabolism	Biological Process: polyamine metabolic process (GO:0006595);;	K01581|0|cmo:103488379|ornithine decarboxylase-like	Arginine and proline metabolism (ko00330);; Glutathione metabolism (ko00480)	[E]	Amino acid transport and metabolism	Pyridoxal-dependent decarboxylase, pyridoxal binding domain;; Pyridoxal-dependent decarboxylase, C-terminal sheet domain	sp|P50134|DCOR_DATST Ornithine decarboxylase OS=Datura stramonium OX=4076 PE=2 SV=1	E	Amino acid transport and metabolism	ornithine decarboxylase-like [Cucumis melo var. makuwa]
Cla97C05G106580	2419	5664	7231	468	690	429	49.1252	74.9655	107.897	7.13628	8.13635	5.81338	6.57e-22	-3.57811	down	--	--	Biological Process: transport (GO:0006810);; Cellular Component: intrinsic component of membrane (GO:0031224);;	K15275|0|csv:101222296|UDP-galactose/UDP-glucose transporter 3	--	[G]	Carbohydrate transport and metabolism	UAA transporter family	sp|Q9M9S6|UTR3_ARATH UDP-galactose/UDP-glucose transporter 3 OS=Arabidopsis thaliana OX=3702 GN=UTR3 PE=1 SV=1	G	Carbohydrate transport and metabolism	PREDICTED: UDP-galactose/UDP-glucose transporter 3 [Cucumis melo]
Cla97C09G179230	197	460	684	71	179	82	2.86725	4.37575	7.33225	0.769892	1.51331	0.794102	3.33e-06	-2.36665	down	[I]	Lipid transport and metabolism	Biological Process: pyruvate metabolic process (GO:0006090);; Biological Process: phospholipid biosynthetic process (GO:0008654);; Molecular Function: oxidoreductase activity, acting on CH or CH2 groups, NAD or NADP as acceptor (GO:0016726);; Molecular Function: cation binding (GO:0043169);;	K03527|0|csv:101205824|4-hydroxy-3-methylbut-2-enyl diphosphate reductase, chloroplastic	Terpenoid backbone biosynthesis (ko00900)	--	--	LytB protein	sp|Q94B35|ISPH_ARATH 4-hydroxy-3-methylbut-2-enyl diphosphate reductase, chloroplastic OS=Arabidopsis thaliana OX=3702 GN=ISPH PE=1 SV=1	IM	Lipid transport and metabolism;; Cell wall/membrane/envelope biogenesis	PREDICTED: 4-hydroxy-3-methylbut-2-enyl diphosphate reductase, chloroplastic-like isoform X1 [Cucumis sativus]
Cla97C05G084720	2194	1740	1169	962	870	623	115.908	59.9107	45.3571	38.177	26.7025	21.9984	0.00106125	-1.44346	down	--	--	Biological Process: response to stress (GO:0006950);; Cellular Component: chloroplast thylakoid (GO:0009534);; Biological Process: response to light intensity (GO:0009642);; Biological Process: photosynthetic electron transport chain (GO:0009767);;	--	--	--	--	--	sp|Q9SL05|PGR5_ARATH Protein PROTON GRADIENT REGULATION 5, chloroplastic OS=Arabidopsis thaliana OX=3702 GN=PGR5 PE=1 SV=1	S	Function unknown	PREDICTED: protein PROTON GRADIENT REGULATION 5, chloroplastic-like [Cucumis melo]
Cla97C01G008870	15555	34003	15781	6348	8990	15182	255.968	364.653	190.801	78.4894	86.0005	167.036	0.000958798	-1.37253	down	[C]	Energy production and conversion	Molecular Function: nucleotide binding (GO:0000166);; Molecular Function: isocitrate dehydrogenase activity (GO:0004448);; Biological Process: citrate metabolic process (GO:0006101);; Molecular Function: metal ion binding (GO:0046872);;	K00031|0|cmax:111489234|cytosolic isocitrate dehydrogenase [NADP] isoform X1	Citrate cycle (TCA cycle) (ko00020);; Glutathione metabolism (ko00480);; Carbon metabolism (ko01200);; 2-Oxocarboxylic acid metabolism (ko01210);; Biosynthesis of amino acids (ko01230);; Peroxisome (ko04146)	[C]	Energy production and conversion	Isocitrate/isopropylmalate dehydrogenase	sp|Q40345|IDHP_MEDSA Isocitrate dehydrogenase [NADP], chloroplastic (Fragment) OS=Medicago sativa OX=3879 PE=2 SV=1	C	Energy production and conversion	cytosolic isocitrate dehydrogenase [NADP] isoform X2 [Cucurbita maxima]
Cla97C01G023480	482	1774	888	239	437	417	5.51808	13.2501	7.47243	2.05526	2.90661	3.19054	1.3e-05	-1.77804	down	[GHR]	Carbohydrate transport and metabolism;; Coenzyme transport and metabolism;; General function prediction only	Molecular Function: carboxy-lyase activity (GO:0016831);; Molecular Function: vitamin binding (GO:0019842);; Molecular Function: metal ion binding (GO:0046872);;	K01568|0|csv:101217174|pyruvate decarboxylase 1	Glycolysis / Gluconeogenesis (ko00010)	[EH]	Amino acid transport and metabolism;; Coenzyme transport and metabolism	Thiamine pyrophosphate enzyme, N-terminal TPP binding domain;; Thiamine pyrophosphate enzyme, central domain;; Thiamine pyrophosphate enzyme, C-terminal TPP binding domain	sp|P51850|PDC1_PEA Pyruvate decarboxylase 1 OS=Pisum sativum OX=3888 GN=PDC1 PE=2 SV=1	EH	Amino acid transport and metabolism;; Coenzyme transport and metabolism	PREDICTED: pyruvate decarboxylase 1-like [Cucumis sativus]
Cla97C11G208930	1463	741	7554	26	29	16	67.7518	22.3595	257.115	0.884015	0.754447	0.475946	9.31e-20	-7.46797	down	--	--	Biological Process: phosphorelay signal transduction system (GO:0000160);; Molecular Function: nucleic acid binding transcription factor activity (GO:0001071);; Biological Process: response to acid chemical (GO:0001101);; Molecular Function: DNA binding (GO:0003677);; Molecular Function: transcription cofactor activity (GO:0003712);; Biological Process: transcription, DNA-templated (GO:0006351);;…	K03627|3.02709e-90|cmo:103497758|multiprotein-bridging factor 1c	--	[K]	Transcription	Multiprotein bridging factor 1;; Helix-turn-helix	sp|Q9LV58|MBF1C_ARATH Multiprotein-bridging factor 1c OS=Arabidopsis thaliana OX=3702 GN=MBF1C PE=1 SV=1	K	Transcription	PREDICTED: multiprotein-bridging factor 1c [Cucumis melo]
Cla97C05G082750	748	1836	1495	472	923	601	21.97	35.1775	32.2903	10.4202	15.7695	11.8044	6.58e-06	-1.34506	down	[O]	Posttranslational modification, protein turnover, chaperones	Molecular Function: catalytic activity (GO:0003824);; Biological Process: cellular amino acid metabolic process (GO:0006520);; Cellular Component: intracellular part (GO:0044424);;	K01800|2.21624e-123|csv:101213403|glutathione S-transferase zeta class isoform X2	Tyrosine metabolism (ko00350)	[O]	Posttranslational modification, protein turnover, chaperones	Glutathione S-transferase, N-terminal domain;; Glutathione S-transferase, N-terminal domain;; Glutathione S-transferase, N-terminal domain;; Glutathione S-transferase, C-terminal domain;; Glutathione S-transferase, C-terminal domain	sp|P57108|GSTZ_EUPES Glutathione S-transferase zeta class OS=Euphorbia esula OX=3993 PE=2 SV=1	O	Posttranslational modification, protein turnover, chaperones	PREDICTED: glutathione S-transferase zeta class-like isoform X4 [Cucumis melo]
Cla97C07G142350	447	226	1232	44	39	43	6.93741	2.2893	14.0712	0.503928	0.347585	0.439795	2.99e-10	-4.28242	down	--	--	--	--	--	--	--	BAG domain;; IQ calmodulin-binding motif	sp|O65373|BAG5_ARATH BAG family molecular chaperone regulator 5, mitochondrial OS=Arabidopsis thaliana OX=3702 GN=BAG5 PE=1 SV=1	S	Function unknown	BAG family molecular chaperone regulator 6-like isoform X1 [Cucurbita pepo subsp. pepo]
Cla97C05G085640	1867	5824	6450	613	1785	1230	23.4201	47.6232	59.4632	5.77278	13.0211	10.3184	1.1e-06	-2.28517	down	--	--	Biological Process: phosphate-containing compound metabolic process (GO:0006796);; Molecular Function: transferase activity, transferring phosphorus-containing groups (GO:0016772);; Molecular Function: purine ribonucleoside binding (GO:0032550);;	--	--	--	--	Zeta toxin	sp|Q0WUY1|NADKC_ARATH Calmodulin calcium-dependent NAD kinase OS=Arabidopsis thaliana OX=3702 GN=NADKC PE=1 SV=1	S	Function unknown	hypothetical protein Csa_009657 [Cucumis sativus]
Cla97C08G158660	1083	1308	810	448	876	556	14.1353	11.1255	7.76735	4.39379	6.64857	4.84991	0.000228553	-1.15756	down	[Q]	Secondary metabolites biosynthesis, transport and catabolism	Biological Process: fatty acid metabolic process (GO:0006631);; Molecular Function: transferase activity, transferring acyl groups (GO:0016746);; Cellular Component: intrinsic component of membrane (GO:0031224);;	K15397|0|cmo:103487967|3-ketoacyl-CoA synthase 4-like	Fatty acid elongation (ko00062);; Plant-pathogen interaction (ko04626)	--	--	FAE1/Type III polyketide synthase-like protein;; 3-Oxoacyl-[acyl-carrier-protein (ACP)] synthase III C terminal;; Chalcone and stilbene synthases, C-terminal domain	sp|Q9LN49|KCS4_ARATH 3-ketoacyl-CoA synthase 4 OS=Arabidopsis thaliana OX=3702 GN=KCS4 PE=2 SV=1	I	Lipid transport and metabolism	3-ketoacyl-CoA synthase 4-like [Cucumis melo var. makuwa]
Cla97C05G102390	139	917	811	34	150	30	1.76936	7.60774	7.58575	0.316667	1.10729	0.250087	4.24e-06	-3.46119	down	[F]	Nucleotide transport and metabolism	Biological Process: transport (GO:0006810);; Cellular Component: intrinsic component of membrane (GO:0031224);;	--	--	[F]	Nucleotide transport and metabolism	Permease family	sp|O04472|NAT10_ARATH Putative nucleobase-ascorbate transporter 10 OS=Arabidopsis thaliana OX=3702 GN=NAT10 PE=3 SV=2	F	Nucleotide transport and metabolism	putative nucleobase-ascorbate transporter 10 isoform X2 [Cucumis melo var. makuwa]
Cla97C08G152880	160	566	1001	84	126	177	4.85447	11.2319	22.3883	1.90083	2.22213	3.59628	0.00010809	-2.43135	down	--	--	--	--	--	--	--	--	--	124		putative transmembrane protein [Cucumis melo var. makuwa]
Cla97C06G124920	367	1040	1125	463	565	450	8.67404	16.0161	19.5447	8.21541	7.76163	7.11252	0.0058424	-1.05015	down	--	--	--	--	--	--	--	BSD domain	--	S	Function unknown	PREDICTED: uncharacterized protein LOC103494072 [Cucumis melo]
Cla97C09G184080	242	517	3454	51	126	33	17.3879	24.2135	182.592	2.74434	5.25804	1.54871	2.4e-07	-4.71539	down	--	--	--	--	--	--	--	--	--	--	--	hypothetical protein Csa_015748 [Cucumis sativus]
Cla97C07G130890	2000	3109	2388	939	1602	1320	61.2	61.9916	53.6891	21.5833	28.4961	27.009	4.04e-12	-1.30101	down	--	--	Molecular Function: nucleic acid binding transcription factor activity (GO:0001071);; Molecular Function: nucleic acid binding (GO:0003676);; Biological Process: transcription, DNA-templated (GO:0006351);; Cellular Component: intracellular membrane-bounded organelle (GO:0043231);;	K09286|7.36619e-89|cmo:103495486|ethylene-responsive transcription factor 4	--	--	--	AP2 domain	sp|Q9FE67|ERF80_ARATH Ethylene-responsive transcription factor 9 OS=Arabidopsis thaliana OX=3702 GN=ERF9 PE=2 SV=1	K	Transcription	PREDICTED: LOW QUALITY PROTEIN: ethylene-responsive transcription factor 4 [Cucumis melo]
Cla97C08G148300	43	111	235	29	65	7	0.591202	1.00348	2.40876	0.303949	0.523241	0.064851	0.00871206	-2.31632	down	--	--	Biological Process: transcription, DNA-templated (GO:0006351);;	--	--	--	--	GRAS domain family	sp|Q5NE24|NSP2_MEDTR Protein NODULATION SIGNALING PATHWAY 2 OS=Medicago truncatula OX=3880 GN=NSP2 PE=1 SV=1	K	Transcription	PREDICTED: nodulation-signaling pathway 2 protein [Cucumis melo]
Cla97C03G066320	806	1035	2087	674	1039	576	22.4241	18.7628	42.6701	14.0897	16.7965	10.7004	0.00750565	-1.14103	down	--	--	Cellular Component: intrinsic component of membrane (GO:0031224);; Cellular Component: intracellular membrane-bounded organelle (GO:0043231);;	K13989|3.42101e-166|cmo:103492274|derlin-1	Protein processing in endoplasmic reticulum (ko04141)	[S]	Function unknown	Der1-like family	sp|Q8VZU9|DERL1_ARATH Derlin-1 OS=Arabidopsis thaliana OX=3702 GN=DER1 PE=2 SV=1	S	Function unknown	PREDICTED: derlin-1 [Cucumis melo]
Cla97C03G065870	315	836	894	260	369	192	27.6497	47.8415	57.6928	17.1285	18.8276	11.2236	6.13e-05	-1.61292	down	--	--	Cellular Component: intrinsic component of membrane (GO:0031224);;	--	--	--	--	Oligosaccharyltransferase subunit 5	--	S	Function unknown	PREDICTED: transmembrane protein 258 [Cucumis sativus]
Cla97C11G214000	274	928	356	88	198	283	2.68222	5.9273	2.55722	0.643195	1.12752	1.85085	0.00170515	-1.70359	down	[MDT]	Cell wall/membrane/envelope biogenesis;; Cell cycle control, cell division, chromosome partitioning;; Signal transduction mechanisms	Molecular Function: purine ribonucleoside binding (GO:0032550);;	K22766|0|cmo:103485485|fidgetin-like protein 1	--	[O]	Posttranslational modification, protein turnover, chaperones	ATPase family associated with various cellular activities (AAA);; Vps4 C terminal oligomerisation domain;; AAA+ lid domain;; AAA domain (dynein-related subfamily)	sp|F4JEX5|FIGL1_ARATH ATPase family AAA domain-containing protein FIGL1 OS=Arabidopsis thaliana OX=3702 GN=FIGL1 PE=2 SV=2	O	Posttranslational modification, protein turnover, chaperones	PREDICTED: fidgetin-like protein 1 [Cucumis melo]
Cla97C05G107690	900	7898	6357	495	1187	440	9.34689	53.4724	48.5223	3.86171	7.16467	3.05195	1.78e-06	-3.10422	down	[T]	Signal transduction mechanisms	Molecular Function: protein tyrosine kinase activity (GO:0004713);; Biological Process: protein phosphorylation (GO:0006468);; Cellular Component: intrinsic component of membrane (GO:0031224);; Molecular Function: purine ribonucleoside binding (GO:0032550);;	--	--	--	--	Protein kinase domain;; Protein tyrosine and serine/threonine kinase;; Salt stress response/antifungal	sp|Q9CAL2|CRK3_ARATH Cysteine-rich receptor-like protein kinase 3 OS=Arabidopsis thaliana OX=3702 GN=CRK3 PE=2 SV=1	T	Signal transduction mechanisms	PREDICTED: cysteine-rich receptor-like protein kinase 3 [Cucumis sativus]
Cla97C11G224970	657	1632	2548	314	789	383	24.1173	39.0716	68.8062	8.64648	16.8529	9.39512	3.42e-05	-2.05173	down	--	--	--	K22936|2.19246e-101|cpep:111797118|protein canopy-1-like	--	--	--	TLR4 regulator and MIR-interacting MSAP	sp|Q7JXF7|SEELE_DROME Protein seele OS=Drosophila melanogaster OX=7227 GN=sel PE=1 SV=1	S	Function unknown	protein canopy-1-like isoform X2 [Cucurbita moschata]
Cla97C06G116820	761	2474	3564	913	1175	1129	27.6484	58.6274	95.2087	24.9398	24.8381	27.4337	0.00507343	-1.35133	down	--	--	Cellular Component: intrinsic component of membrane (GO:0031224);;	K13347|6.26599e-120|cpep:111806519|peroxisomal membrane protein PMP22	Peroxisome (ko04146)	[R]	General function prediction only	Mpv17 / PMP22 family	sp|Q9ZS51|PMP22_ARATH Peroxisomal membrane protein PMP22 OS=Arabidopsis thaliana OX=3702 GN=PMP22 PE=1 SV=1	S	Function unknown	peroxisomal membrane protein PMP22 [Cucurbita moschata]
Cla97C07G142600	1798	3175	4115	1531	2247	1498	34.6309	39.8665	58.2535	22.1645	25.1608	19.2871	0.000248502	-1.113	down	--	--	Biological Process: metabolic process (GO:0008152);; Molecular Function: transferase activity, transferring one-carbon groups (GO:0016741);;	--	--	[R]	General function prediction only	Lysine methyltransferase	sp|Q55DL2|MET18_DICDI Histidine protein methyltransferase 1 homolog OS=Dictyostelium discoideum OX=44689 GN=DDB_G0270580 PE=3 SV=1	S	Function unknown	PREDICTED: uncharacterized protein LOC103494545 [Cucumis melo]
Cla97C04G070670	416	894	1123	360	587	363	27.2893	38.219	54.1736	17.7562	22.3821	15.8984	0.000789954	-1.21438	down	--	--	--	--	--	--	--	--	--	125		PREDICTED: uncharacterized protein LOC103502450 isoform X2 [Cucumis melo]
Cla97C10G187740	888	2485	2592	612	1004	623	10.6664	19.4512	22.8752	5.52215	7.0083	5.00173	3.33e-06	-1.71206	down	[O]	Posttranslational modification, protein turnover, chaperones	Biological Process: cellular homeostasis (GO:0019725);;	K17609|0|cmo:103490942|probable nucleoredoxin 1	--	[R]	General function prediction only	Thioredoxin-like;; AhpC/TSA family;; Thioredoxin;; Redoxin;; Thioredoxin-like domain;; SCO1/SenC;; C1 domain;; Thioredoxin-like;; Thioredoxin	sp|O80763|NRX1_ARATH Probable nucleoredoxin 1 OS=Arabidopsis thaliana OX=3702 GN=At1g60420 PE=1 SV=1	O	Posttranslational modification, protein turnover, chaperones	PREDICTED: probable nucleoredoxin 1 [Cucumis melo]
Cla97C05G084750	316	701	1009	300	466	313	22.2039	32.1799	52.2192	15.8601	19.0559	14.7249	0.00278662	-1.22461	down	--	--	--	--	--	--	--	--	--	172		PREDICTED: uncharacterized protein LOC101205158 [Cucumis sativus]
Cla97C02G043880	2345	4082	5042	1807	3144	1674	157.015	178.126	248.08	90.8872	122.364	74.9195	0.00031237	-1.13811	down	--	--	Cellular Component: intracellular membrane-bounded organelle (GO:0043231);;	K12160|1.60411e-68|csv:101205142|small ubiquitin-related modifier 1	--	[O]	Posttranslational modification, protein turnover, chaperones	Ubiquitin-2 like Rad60 SUMO-like;; Ubiquitin family	sp|Q9FLP6|SUMO2_ARATH Small ubiquitin-related modifier 2 OS=Arabidopsis thaliana OX=3702 GN=SUMO2 PE=1 SV=1	O	Posttranslational modification, protein turnover, chaperones	PREDICTED: small ubiquitin-related modifier 1 [Cucumis sativus]
Cla97C11G213800	12174	24274	11793	6367	9989	7963	243.592	316.537	173.379	95.7313	116.199	106.532	7.43e-07	-1.29776	down	[G]	Carbohydrate transport and metabolism	Molecular Function: nucleotide binding (GO:0000166);; Molecular Function: oxidoreductase activity, acting on the aldehyde or oxo group of donors (GO:0016903);; Biological Process: hexose metabolic process (GO:0019318);;	K00134|0|csv:101214545|glyceraldehyde-3-phosphate dehydrogenase, cytosolic	Glycolysis / Gluconeogenesis (ko00010);; Carbon fixation in photosynthetic organisms (ko00710);; Carbon metabolism (ko01200);; Biosynthesis of amino acids (ko01230)	[G]	Carbohydrate transport and metabolism	Glyceraldehyde 3-phosphate dehydrogenase, C-terminal domain;; Glyceraldehyde 3-phosphate dehydrogenase, NAD binding domain	sp|P34783|G3P_ATRNU Glyceraldehyde-3-phosphate dehydrogenase OS=Atriplex nummularia OX=3553 PE=2 SV=1	G	Carbohydrate transport and metabolism	PREDICTED: glyceraldehyde-3-phosphate dehydrogenase, cytosolic [Cucumis sativus]
Cla97C09G183600	365	741	857	94	364	251	6.75075	8.93624	11.6587	1.29833	3.9117	3.09941	0.000153685	-1.83584	down	[O]	Posttranslational modification, protein turnover, chaperones	Molecular Function: endopeptidase activity (GO:0004175);; Cellular Component: extracellular region (GO:0005576);; Cellular Component: membrane (GO:0016020);; Biological Process: protein metabolic process (GO:0019538);; Molecular Function: transition metal ion binding (GO:0046914);;	--	--	[OW]	Posttranslational modification, protein turnover, chaperones;; Extracellular structures	Matrixin;; Putative peptidoglycan binding domain	sp|O04529|2MMP_ARATH Metalloendoproteinase 2-MMP OS=Arabidopsis thaliana OX=3702 GN=2MMP PE=1 SV=1	O	Posttranslational modification, protein turnover, chaperones	PREDICTED: metalloendoproteinase 1-like [Cucumis sativus]
Cla97C05G090340	2410	23195	57198	5128	7290	2164	56.7733	356.218	990.389	90.8012	99.8733	34.0838	0.00125114	-2.79219	down	--	--	--	--	--	--	--	C2 domain	--	S	Function unknown	PREDICTED: protein SRC2 homolog [Cucumis melo]
Cla97C11G208250	245	312	511	112	169	123	11.0779	9.20064	17.0377	3.8042	4.44724	3.70511	2.92e-06	-1.75861	down	--	--	Molecular Function: phospholipase activity (GO:0004620);; Biological Process: lipid metabolic process (GO:0006629);; Molecular Function: metal ion binding (GO:0046872);;	--	--	--	--	--	sp|Q9XG80|PLA21_ORYSJ Probable phospholipase A2 homolog 1 OS=Oryza sativa subsp. japonica OX=39947 GN=PLA2-I PE=2 SV=1	T	Signal transduction mechanisms	PREDICTED: probable phospholipase A2 homolog 1 [Cucumis melo]
Cla97C09G178780	2744	5073	3932	2451	2238	2010	117.434	141.502	123.646	78.8079	55.6731	57.5189	5.83e-06	-1.09341	down	--	--	Cellular Component: intrinsic component of membrane (GO:0031224);;	--	--	--	--	--	--	305		uncharacterized protein LOC111777191 [Cucurbita pepo subsp. pepo]
Cla97C08G159930	150	691	194	22	122	62	2.70081	8.1432	2.57447	0.287392	1.27477	0.74867	0.000146046	-2.6216	down	--	--	Cellular Component: intracellular membrane-bounded organelle (GO:0043231);;	K06627|0|cmo:103487861|cyclin-A3-2-like	--	[D]	Cell cycle control, cell division, chromosome partitioning	Cyclin, N-terminal domain;; Cyclin, C-terminal domain	sp|Q9C6A9|CCA32_ARATH Cyclin-A3-2 OS=Arabidopsis thaliana OX=3702 GN=CYCA3-2 PE=2 SV=1	D	Cell cycle control, cell division, chromosome partitioning	PREDICTED: cyclin-A3-2-like [Cucumis melo]
Cla97C05G083380	1214	2668	3776	340	868	524	39.0921	55.9863	89.344	8.22577	16.2355	11.2772	9.03e-09	-2.49387	down	[F]	Nucleotide transport and metabolism	Biological Process: pyrimidine nucleotide metabolic process (GO:0006220);; Molecular Function: phosphotransferase activity, phosphate group as acceptor (GO:0016776);; Molecular Function: nucleotide kinase activity (GO:0019201);; Biological Process: pyrimidine nucleobase biosynthetic process (GO:0019856);; Molecular Function: purine ribonucleoside binding (GO:0032550);; Cellular Component: intrace…	K13800|8.79496e-142|cmo:103483424|UMP-CMP kinase 3	Pyrimidine metabolism (ko00240);; Biosynthesis of cofactors (ko01240)	[F]	Nucleotide transport and metabolism	Adenylate kinase;; AAA domain;; AAA domain;; AAA domain;; Thymidylate kinase	sp|O04905|KCY3_ARATH UMP-CMP kinase 3 OS=Arabidopsis thaliana OX=3702 GN=UMK3 PE=1 SV=1	F	Nucleotide transport and metabolism	PREDICTED: UMP-CMP kinase 3 [Cucumis melo]
Cla97C04G071820	6600	15075	13357	4310	5678	4321	171.026	254.573	254.314	83.909	85.5258	74.8511	1.31e-10	-1.58383	down	[IQR]	Lipid transport and metabolism;; Secondary metabolites biosynthesis, transport and catabolism;; General function prediction only	Molecular Function: fatty acid synthase activity (GO:0004312);; Biological Process: single-organism metabolic process (GO:0044710);;	K00059|4.1301e-146|csv:101221009|NADPH-dependent aldehyde reductase-like protein, chloroplastic	Fatty acid biosynthesis (ko00061);; Biotin metabolism (ko00780);; Fatty acid metabolism (ko01212);; Biosynthesis of cofactors (ko01240)	[R]	General function prediction only	Enoyl-(Acyl carrier protein) reductase;; short chain dehydrogenase;; KR domain;; NAD dependent epimerase/dehydratase family	sp|Q9SQR4|ADRC3_ARATH NADPH-dependent aldehyde reductase-like protein, chloroplastic OS=Arabidopsis thaliana OX=3702 GN=At3g03980 PE=3 SV=1	Q	Secondary metabolites biosynthesis, transport and catabolism	PREDICTED: short-chain type dehydrogenase/reductase [Cucumis sativus]
Cla97C01G017790	3582	18388	15266	4458	8800	3060	74.761	250.143	234.143	69.9163	106.786	42.6975	0.00642625	-1.47007	down	--	--	--	K15104|0|csv:101204542|mitochondrial uncoupling protein 5	--	[C]	Energy production and conversion	Mitochondrial carrier protein	sp|Q9SJY5|PUMP5_ARATH Mitochondrial uncoupling protein 5 OS=Arabidopsis thaliana OX=3702 GN=PUMP5 PE=2 SV=1	C	Energy production and conversion	PREDICTED: mitochondrial uncoupling protein 5 [Cucumis sativus]
Cla97C05G098640	401	396	998	43	97	48	19.6255	12.6202	35.9084	1.56711	2.75422	1.56326	2.81e-12	-3.6617	down	--	--	--	K13120|8.07859e-63|mcha:111020414|protein FAM32A-like	--	[S]	Function unknown	Eukaryotic family of unknown function (DUF1754)	sp|Q6GQN4|FA32A_DANRE Protein FAM32A-like OS=Danio rerio OX=7955 GN=fam32al PE=3 SV=1	S	Function unknown	protein FAM32A-like [Momordica charantia]
Cla97C01G018670	529	1101	1276	421	528	527	10.358	14.0571	18.3704	6.19419	6.01366	6.90618	6.92e-05	-1.27304	down	--	--	--	--	--	--	--	--	sp|A2RVJ8|HIT4_ARATH Protein HEAT INTOLERANT 4 OS=Arabidopsis thaliana OX=3702 GN=HIT4 PE=1 SV=1	496		uncharacterized protein LOC111005966 [Momordica charantia]
Cla97C09G164770	210	467	791	58	72	69	2.52551	3.66683	6.99899	0.517724	0.500136	0.55442	9.06e-11	-3.17959	down	[L]	Replication, recombination and repair	Molecular Function: DNA photolyase activity (GO:0003913);; Biological Process: response to light stimulus (GO:0009416);;	K02295|0|csv:101221517|(6-4)DNA photolyase isoform X1	--	[LT]	Replication, recombination and repair;; Signal transduction mechanisms	FAD binding domain of DNA photolyase;; DNA photolyase	sp|O48652|UVR3_ARATH (6-4)DNA photolyase OS=Arabidopsis thaliana OX=3702 GN=UVR3 PE=1 SV=2	LT	Replication, recombination and repair;; Signal transduction mechanisms	(6-4)DNA photolyase isoform X1 [Cucumis melo var. makuwa]
Cla97C02G050250	166	1991	6068	158	379	280	1.79912	14.0608	48.3221	1.28155	2.38449	2.02555	7.61e-05	-3.64103	down	[S]	Function unknown	--	--	--	--	--	--	sp|Q9LHN9|IQM2_ARATH IQ domain-containing protein IQM2 OS=Arabidopsis thaliana OX=3702 GN=IQM2 PE=2 SV=1	S	Function unknown	PREDICTED: uncharacterized protein LOC101218379 [Cucumis sativus]
Cla97C08G145700	7928	38060	61943	3236	7852	3902	95.2382	297.972	546.749	29.2099	54.836	31.3402	3.31e-07	-3.16341	down	[O]	Posttranslational modification, protein turnover, chaperones	Molecular Function: catalytic activity (GO:0003824);; Biological Process: cellular homeostasis (GO:0019725);;	K17609|0|cmo:103498641|PDI2; probable nucleoredoxin 1	--	[R]	General function prediction only	Thioredoxin-like;; AhpC/TSA family;; Redoxin;; Thioredoxin;; Thioredoxin-like domain;; SCO1/SenC;; C1 domain;; Thioredoxin-like;; Ligase-CoA domain;; F plasmid transfer operon protein	sp|O80763|NRX1_ARATH Probable nucleoredoxin 1 OS=Arabidopsis thaliana OX=3702 GN=At1g60420 PE=1 SV=1	O	Posttranslational modification, protein turnover, chaperones	putative nucleoredoxin 1 [Cucumis melo var. makuwa]
Cla97C08G152250	984	2247	4010	879	1556	533	91.1261	135.62	272.954	61.1878	83.7972	32.9575	0.00240931	-1.62724	down	--	--	Cellular Component: proteasome regulatory particle (GO:0005838);; Biological Process: RNA export from nucleus (GO:0006405);; Biological Process: cellular protein complex assembly (GO:0043623);;	K10881|2.44469e-08|csv:101214977|protein DSS1 HOMOLOG ON CHROMOSOME V	Proteasome (ko03050);; Homologous recombination (ko03440)	--	--	DSS1/SEM1 family	--	S	Function unknown	PREDICTED: probable 26S proteasome complex subunit sem1-2 [Cucumis sativus]
Cla97C06G127300	2018	4369	15704	302	1108	247	70.7116	99.7713	404.354	7.95093	22.5647	5.7688	7.77e-08	-4.15209	down	[O]	Posttranslational modification, protein turnover, chaperones	Biological Process: response to stress (GO:0006950);; Molecular Function: oxidoreductase activity, acting on a sulfur group of donors, disulfide as acceptor (GO:0016671);; Biological Process: cellular protein metabolic process (GO:0044267);; Biological Process: single-organism metabolic process (GO:0044710);;	K07304|7.33052e-111|cmo:103502352|peptide methionine sulfoxide reductase-like	--	[O]	Posttranslational modification, protein turnover, chaperones	Peptide methionine sulfoxide reductase	sp|P54153|MSRA_SOLLC Peptide methionine sulfoxide reductase (Fragment) OS=Solanum lycopersicum OX=4081 GN=E4 PE=3 SV=1	O	Posttranslational modification, protein turnover, chaperones	PREDICTED: peptide methionine sulfoxide reductase-like [Cucumis melo]
Cla97C09G182470	410	787	719	91	238	117	8.58382	10.7328	11.059	1.42655	2.89266	1.63306	6.31e-12	-2.46397	down	[E]	Amino acid transport and metabolism	Biological Process: L-serine metabolic process (GO:0006563);; Molecular Function: serine O-acyltransferase activity (GO:0016412);; Cellular Component: intracellular part (GO:0044424);;	K00640|0|cmo:103501225|serine acetyltransferase 1, chloroplastic	Cysteine and methionine metabolism (ko00270);; Sulfur metabolism (ko00920);; Carbon metabolism (ko01200);; Biosynthesis of amino acids (ko01230)	[E]	Amino acid transport and metabolism	Serine acetyltransferase, N-terminal;; Bacterial transferase hexapeptide (six repeats)	sp|Q42588|SAT1_ARATH Serine acetyltransferase 1, chloroplastic OS=Arabidopsis thaliana OX=3702 GN=SAT1 PE=1 SV=2	E	Amino acid transport and metabolism	PREDICTED: serine acetyltransferase 1, chloroplastic [Cucumis melo]
Cla97C10G201360	1218	3366	7466	1148	1651	1075	37.9528	68.3692	170.972	26.882	29.9057	22.3894	0.000651468	-1.94299	down	[V]	Defense mechanisms	--	--	--	--	--	NUDIX domain	sp|Q9CAF2|NUD26_ARATH Nudix hydrolase 26, chloroplastic OS=Arabidopsis thaliana OX=3702 GN=NUDT26 PE=1 SV=1	G	Carbohydrate transport and metabolism	nudix hydrolase 26, chloroplastic-like [Cucurbita moschata]
Cla97C10G193800	261	444	600	188	371	221	1.73109	1.91991	2.92277	0.934398	1.42865	0.97857	0.00276549	-1.09615	down	[J]	Translation, ribosomal structure and biogenesis	Molecular Function: nucleoside-triphosphatase activity (GO:0017111);; Molecular Function: purine ribonucleoside binding (GO:0032550);; Molecular Function: cation binding (GO:0043169);;	--	--	[A]	RNA processing and modification	Helicase conserved C-terminal domain;; Zinc finger C-x8-C-x5-C-x3-H type (and similar);; CCCH-type zinc finger;; DEAD/DEAH box helicase;; Zinc finger domain	sp|O22243|C3H31_ARATH DExH-box ATP-dependent RNA helicase DExH8 OS=Arabidopsis thaliana OX=3702 GN=At2g47680 PE=2 SV=2	A	RNA processing and modification	PREDICTED: DExH-box ATP-dependent RNA helicase DExH8 isoform X1 [Cucumis melo]
Cla97C09G162230	242	370	799	5	28	4	20.9344	20.8957	50.901	0.280168	1.40646	0.18977	8.13e-14	-5.69538	down	--	--	--	--	--	--	--	--	--	49		hypothetical protein E5676_scaffold347G00530 [Cucumis melo var. makuwa]
Cla97C01G006830	2522	6261	16342	3729	3963	2780	95.8277	155.021	456.215	106.456	87.5357	70.6208	0.00999655	-1.55302	down	[V]	Defense mechanisms	Molecular Function: catalytic activity (GO:0003824);;	K07766|3.21457e-113|cmo:103504536|nudix hydrolase 18, mitochondrial	--	[T]	Signal transduction mechanisms	NUDIX domain	sp|Q9ZU95|NUD17_ARATH Nudix hydrolase 17, mitochondrial OS=Arabidopsis thaliana OX=3702 GN=NUDT17 PE=2 SV=1	T	Signal transduction mechanisms	PREDICTED: nudix hydrolase 18, mitochondrial [Cucumis melo]
Cla97C10G200550	653	1857	2306	558	853	720	15.2237	28.2176	39.5018	9.77805	11.5581	11.2122	0.000366979	-1.46582	down	[L]	Replication, recombination and repair	Molecular Function: nucleic acid binding (GO:0003676);; Biological Process: DNA repair (GO:0006281);; Molecular Function: DNA N-glycosylase activity (GO:0019104);;	K03652|1.66109e-168|cmo:103486748|DNA-3-methyladenine glycosylase	Base excision repair (ko03410)	[L]	Replication, recombination and repair	Methylpurine-DNA glycosylase (MPG)	sp|Q39147|3MG_ARATH DNA-3-methyladenine glycosylase OS=Arabidopsis thaliana OX=3702 GN=MAG PE=2 SV=1	L	Replication, recombination and repair	PREDICTED: DNA-3-methyladenine glycosylase [Cucumis melo]
Cla97C03G063920	310	1134	1585	105	387	134	2.5678	6.12215	9.64963	0.648842	1.86049	0.738336	2.27e-05	-2.63183	down	[T]	Signal transduction mechanisms	Molecular Function: protein kinase activity (GO:0004672);; Biological Process: cellular protein modification process (GO:0006464);; Biological Process: phosphate-containing compound metabolic process (GO:0006796);; Cellular Component: intrinsic component of membrane (GO:0031224);; Molecular Function: purine ribonucleoside binding (GO:0032550);;	--	--	--	--	Protein kinase domain;; Protein tyrosine and serine/threonine kinase;; D-mannose binding lectin	sp|Q39202|RLK1_ARATH G-type lectin S-receptor-like serine/threonine-protein kinase RLK1 OS=Arabidopsis thaliana OX=3702 GN=RLK1 PE=2 SV=2	G	Carbohydrate transport and metabolism	G-type lectin S-receptor-like serine/threonine-protein kinase LECRK2 [Cucumis melo var. makuwa]
Cla97C07G143200	104	533	878	48	210	134	2.03796	6.81982	12.6718	0.700761	2.38932	1.75605	0.00201116	-2.28254	down	[I]	Lipid transport and metabolism	--	--	--	[V]	Defense mechanisms	alpha/beta hydrolase fold;; Carboxylesterase family	sp|Q9LFR7|CXE17_ARATH Probable carboxylesterase 17 OS=Arabidopsis thaliana OX=3702 GN=CXE17 PE=2 SV=1	V	Defense mechanisms	probable carboxylesterase 17 [Cucurbita maxima]
Cla97C11G221840	576	859	986	419	524	534	8.02218	7.80506	10.0966	4.38978	4.24326	4.97548	4.54e-05	-1.03772	down	[C]	Energy production and conversion	Molecular Function: oxidoreductase activity, acting on the aldehyde or oxo group of donors, NAD or NADP as acceptor (GO:0016620);; Biological Process: cellular metabolic process (GO:0044237);; Biological Process: single-organism metabolic process (GO:0044710);;	K00128|0|cmo:103487598|aldehyde dehydrogenase family 3 member H1-like	Glycolysis / Gluconeogenesis (ko00010);; Ascorbate and aldarate metabolism (ko00053);; Fatty acid degradation (ko00071);; Valine, leucine and isoleucine degradation (ko00280);; Lysine degradation (ko00310);; Arginine and proline metabolism (ko00330);; Histidine metabolism (ko00340);; Tryptophan metabolism (ko00380);; beta-Alanine metabolism (ko00410);; Glycerolipid metabolism (ko00561);; Pyruvate…	[C]	Energy production and conversion	Aldehyde dehydrogenase family	sp|Q70DU8|AL3H1_ARATH Aldehyde dehydrogenase family 3 member H1 OS=Arabidopsis thaliana OX=3702 GN=ALDH3H1 PE=1 SV=2	C	Energy production and conversion	PREDICTED: aldehyde dehydrogenase family 3 member H1-like [Cucumis melo]
Cla97C11G209260	62	125	368	34	58	39	3.01871	4.00257	13.3252	1.25408	1.65872	1.25824	0.000516189	-2.41846	down	--	--	--	--	--	--	--	--	--	88		hypothetical protein E6C27_scaffold41G001490 [Cucumis melo var. makuwa]
Cla97C01G015900	849	1136	2528	238	405	124	19.3326	16.855	42.2927	4.05965	5.35939	1.88463	7.54e-08	-2.93342	down	--	--	Molecular Function: nucleic acid binding transcription factor activity (GO:0001071);; Molecular Function: DNA binding (GO:0003677);; Biological Process: transcription, DNA-templated (GO:0006351);; Cellular Component: intracellular membrane-bounded organelle (GO:0043231);;	K09419|1.93439e-150|cmos:111453247|heat shock factor protein HSF24-like	--	[K]	Transcription	HSF-type DNA-binding	sp|P22335|HSF24_SOLPE Heat shock factor protein HSF24 OS=Solanum peruvianum OX=4082 GN=HSF24 PE=2 SV=1	K	Transcription	heat shock factor protein HSF24-like [Cucurbita moschata]
Cla97C04G075130	1283	2237	3790	921	1740	1290	34.5473	39.2749	75.0179	18.6325	27.2543	23.225	0.0022902	-1.23217	down	[CP]	Energy production and conversion;; Inorganic ion transport and metabolism	Biological Process: phosphorus metabolic process (GO:0006793);; Molecular Function: pyrophosphatase activity (GO:0016462);; Cellular Component: intracellular part (GO:0044424);; Molecular Function: metal ion binding (GO:0046872);;	K01507|2.04066e-156|cmo:103490010|soluble inorganic pyrophosphatase 4	Oxidative phosphorylation (ko00190)	[C]	Energy production and conversion	Inorganic pyrophosphatase	sp|Q9LFF9|IPYR4_ARATH Soluble inorganic pyrophosphatase 4 OS=Arabidopsis thaliana OX=3702 GN=PPA4 PE=1 SV=1	C	Energy production and conversion	PREDICTED: soluble inorganic pyrophosphatase 4 [Cucumis melo]
Cla97C06G124380	216	805	2294	44	289	103	11.3968	27.707	89.0463	1.71659	8.87594	3.62773	7.17e-05	-3.32985	down	--	--	--	--	--	--	--	--	--	--	--	hypothetical protein E5676_scaffold629G00500 [Cucumis melo var. makuwa]
Cla97C06G118770	1610	4213	6125	1661	2636	1289	20.8183	35.5029	58.1943	16.1396	19.8128	11.1443	0.00204146	-1.40982	down	[G]	Carbohydrate transport and metabolism	Molecular Function: oxidoreductase activity, acting on the CH-CH group of donors, NAD or NADP as acceptor (GO:0016628);; Molecular Function: transmembrane transporter activity (GO:0022857);; Cellular Component: intrinsic component of membrane (GO:0031224);; Biological Process: single-organism metabolic process (GO:0044710);; Biological Process: single-organism transport (GO:0044765);;	K24193|0|cmo:103503067|sugar transport protein 14-like	--	[R]	General function prediction only	Sugar (and other) transporter;; Major Facilitator Superfamily	sp|Q8GW61|STP14_ARATH Sugar transport protein 14 OS=Arabidopsis thaliana OX=3702 GN=STP14 PE=2 SV=2	U	Intracellular trafficking, secretion, and vesicular transport	PREDICTED: sugar transport protein 14-like [Cucumis melo]
Cla97C07G133620	105	657	1423	124	160	43	10.2079	41.9528	102.456	9.08054	9.11471	2.77027	0.000255915	-3.02189	down	--	--	Cellular Component: intrinsic component of membrane (GO:0031224);;	--	--	--	--	--	--	S	Function unknown	ubiquinol-cytochrome c reductase complex 6.7 kDa protein [Cucurbita maxima]
Cla97C06G126240	3902	11440	16767	1966	5016	3601	43.5438	83.2067	137.492	16.4812	32.5426	26.869	0.00010304	-1.92677	down	--	--	Molecular Function: catalytic activity (GO:0003824);; Biological Process: primary metabolic process (GO:0044238);;	K18875|0|cmo:103493946|protein EDS1L-like	Plant-pathogen interaction (ko04626)	--	--	Enhanced disease susceptibility 1 protein EP domain;; Lipase (class 3)	sp|Q9XF23|EDS1L_ARATH Protein EDS1L OS=Arabidopsis thaliana OX=3702 GN=EDS1 PE=1 SV=1	T	Signal transduction mechanisms	PREDICTED: protein EDS1L-like [Cucumis melo]
Cla97C09G164350	2092	3579	3151	1202	2230	1710	15.5776	17.372	17.2415	6.72625	9.65577	8.51253	1.26e-07	-1.11972	down	[T]	Signal transduction mechanisms	Biological Process: protein transport (GO:0015031);; Cellular Component: cytoplasmic part (GO:0044444);;	K17302|0|csv:101202844|coatomer subunit beta'-2 isoform X2	--	[U]	Intracellular trafficking, secretion, and vesicular transport	Coatomer WD associated region;; WD domain, G-beta repeat;; Anaphase-promoting complex subunit 4 WD40 domain	sp|Q9C827|COB22_ARATH Coatomer subunit beta&apos;-2 OS=Arabidopsis thaliana OX=3702 GN=At1g52360 PE=1 SV=1	U	Intracellular trafficking, secretion, and vesicular transport	PREDICTED: coatomer subunit beta&apos;-2 isoform X2 [Cucumis melo]
Cla97C09G171250	5915	8537	7218	1450	3206	3067	72.2127	67.9205	64.7466	13.2947	22.7518	25.0322	8.38e-10	-1.84992	down	[O]	Posttranslational modification, protein turnover, chaperones	Cellular Component: cytoplasm (GO:0005737);; Biological Process: response to stress (GO:0006950);; Biological Process: response to hormone (GO:0009725);; Biological Process: cellular process (GO:0009987);; Cellular Component: intracellular membrane-bounded organelle (GO:0043231);; Biological Process: single-multicellular organism process (GO:0044707);; Molecular Function: phosphatidylinositol bis…	K09571|0|cmo:103497612|peptidyl-prolyl cis-trans isomerase FKBP62-like	--	[O]	Posttranslational modification, protein turnover, chaperones	FKBP-type peptidyl-prolyl cis-trans isomerase;; Tetratricopeptide repeat;; Tetratricopeptide repeat;; Tetratricopeptide repeat;; BDBT FKBP like N-terminal;; TPR repeat;; Tetratricopeptide repeat	sp|Q38931|FKB62_ARATH Peptidyl-prolyl cis-trans isomerase FKBP62 OS=Arabidopsis thaliana OX=3702 GN=FKBP62 PE=1 SV=2	O	Posttranslational modification, protein turnover, chaperones	PREDICTED: peptidyl-prolyl cis-trans isomerase FKBP62-like [Cucumis melo]
Cla97C05G090640	4348	8883	7965	2847	5101	4609	81.9112	109.056	110.251	40.2987	55.8648	58.0546	3.99e-05	-1.07256	down	[M]	Cell wall/membrane/envelope biogenesis	--	K12795|0|cmo:103484125|protein SGT1 homolog	Plant-pathogen interaction (ko04626)	[T]	Signal transduction mechanisms	SGS domain;; CS domain;; Tetratricopeptide repeat;; Tetratricopeptide repeat;; Tetratricopeptide repeat;; Tetratricopeptide repeat;; Tetratricopeptide repeat;; TPR repeat;; Tetratricopeptide repeat	sp|Q0JL44|SGT1_ORYSJ Protein SGT1 homolog OS=Oryza sativa subsp. japonica OX=39947 GN=SGT1 PE=1 SV=1	T	Signal transduction mechanisms	protein SGT1-like protein [Cucumis melo var. makuwa]
Cla97C08G154290	88	427	393	5	42	5	3.02861	9.58639	9.94267	0.125475	0.829605	0.10859	2.48e-07	-4.51019	down	--	--	--	--	--	--	--	--	--	S	Function unknown	PREDICTED: uncharacterized serine-rich protein C215.13-like [Cucumis melo]
Cla97C10G198690	200	288	531	143	235	102	5.81834	5.45509	11.3735	3.11132	3.97878	1.97526	0.00268184	-1.44836	down	--	--	--	--	--	--	--	Lateral organ boundaries (LOB) domain	sp|Q9SRV3|LBD20_ARATH LOB domain-containing protein 20 OS=Arabidopsis thaliana OX=3702 GN=LBD20 PE=2 SV=1	S	Function unknown	PREDICTED: LOB domain-containing protein 20 [Cucumis melo]
Cla97C06G122860	1170	2245	1494	934	1135	758	44.4317	55.5794	41.6997	26.6406	25.0589	19.2409	1.28e-06	-1.09901	down	[O]	Posttranslational modification, protein turnover, chaperones	Molecular Function: nucleoside-triphosphatase activity (GO:0017111);; Molecular Function: purine ribonucleoside binding (GO:0032550);; Biological Process: establishment of localization (GO:0051234);;	K09013|2.13143e-51|cmo:103494260|ABC transporter I family member 6, chloroplastic	--	--	--	--	sp|Q9CAF5|AB6I_ARATH ABC transporter I family member 6, chloroplastic OS=Arabidopsis thaliana OX=3702 GN=ABCI6 PE=1 SV=1	L	Replication, recombination and repair	ABC transporter I family member 6 [Cucumis melo var. makuwa]
Cla97C06G111120	529	1335	2332	608	964	495	26.4983	43.5807	85.8259	22.8572	28.0553	16.5499	0.00796522	-1.33924	down	--	--	Cellular Component: intrinsic component of membrane (GO:0031224);;	--	--	--	--	LITAF-like zinc ribbon domain	sp|Q94CD4|GILP_ARATH GSH-induced LITAF domain protein OS=Arabidopsis thaliana OX=3702 GN=GILP PE=1 SV=1	S	Function unknown	GSH-induced LITAF domain protein [Momordica charantia]
Cla97C02G042370	1222	5285	7195	459	834	698	24.9552	70.3714	108.02	7.04571	9.90095	9.53328	1.46e-08	-3.06245	down	--	--	Molecular Function: metal ion binding (GO:0046872);;	--	--	--	--	--	--	S	Function unknown	uncharacterized protein LOC111806141 [Cucurbita pepo subsp. pepo]
Cla97C07G139720	9625	14773	13946	5245	5260	9199	103.654	103.683	110.355	42.4396	32.9283	66.2355	0.000216483	-1.26026	down	[C]	Energy production and conversion	Molecular Function: ATP transmembrane transporter activity (GO:0005347);; Biological Process: organic anion transport (GO:0015711);; Cellular Component: intrinsic component of membrane (GO:0031224);; Molecular Function: purine ribonucleoside binding (GO:0032550);;	K03301|0|cmo:103489919|plastidic ATP/ADP-transporter-like	--	--	--	TLC ATP/ADP transporter	sp|O24381|TLC1_SOLTU Plastidic ATP/ADP-transporter OS=Solanum tuberosum OX=4113 PE=2 SV=2	P	Inorganic ion transport and metabolism	PREDICTED: plastidic ATP/ADP-transporter-like [Cucumis melo]
Cla97C09G165790	1930	4383	3031	1212	1272	1863	45.3246	67.0774	52.2876	21.3768	17.3561	29.2365	1.47e-05	-1.3675	down	[G]	Carbohydrate transport and metabolism	Cellular Component: chloroplast thylakoid (GO:0009534);; Molecular Function: purine ribonucleoside binding (GO:0032550);;	--	--	[O]	Posttranslational modification, protein turnover, chaperones	ATPase family associated with various cellular activities (AAA)	sp|Q9ZT00|RCA_MAIZE Ribulose bisphosphate carboxylase/oxygenase activase, chloroplastic OS=Zea mays OX=4577 GN=RCA1 PE=2 SV=3	O	Posttranslational modification, protein turnover, chaperones	PREDICTED: ribulose bisphosphate carboxylase/oxygenase activase, chloroplastic [Cucumis melo]
Cla97C11G207030	321	1123	1530	169	259	339	6.31185	14.4237	22.1605	2.50026	2.96545	4.46685	3.58e-05	-2.22395	down	[R]	General function prediction only	--	--	--	[C]	Energy production and conversion	Aldo/keto reductase family	sp|C6TBN2|AKR1_SOYBN Probable aldo-keto reductase 1 OS=Glycine max OX=3847 GN=AKR1 PE=2 SV=1	C	Energy production and conversion	PREDICTED: probable aldo-keto reductase 1 [Cucumis melo]
Cla97C02G033300	1636	1518	1214	350	928	517	31.0672	18.7929	16.9388	4.98709	10.2446	6.56182	9.71e-06	-1.72571	down	[G]	Carbohydrate transport and metabolism	Biological Process: phenylpropanoid metabolic process (GO:0009698);; Molecular Function: oxidoreductase activity, acting on the CH-OH group of donors, NAD or NADP as acceptor (GO:0016616);; Cellular Component: intrinsic component of membrane (GO:0031224);; Molecular Function: transition metal ion binding (GO:0046914);;	--	--	[Q]	Secondary metabolites biosynthesis, transport and catabolism	Alcohol dehydrogenase GroES-like domain;; Zinc-binding dehydrogenase	sp|Q2KNL5|CADH1_OCIBA Cinnamyl alcohol dehydrogenase 1 OS=Ocimum basilicum OX=39350 GN=CAD1 PE=1 SV=1	Q	Secondary metabolites biosynthesis, transport and catabolism	cinnamyl alcohol dehydrogenase 1-like [Cucurbita pepo subsp. pepo]
Cla97C03G066040	409	743	1468	346	673	309	8.07418	9.5685	21.3306	5.13532	7.72625	4.08025	0.00747177	-1.3374	down	--	--	Biological Process: transport (GO:0006810);; Cellular Component: organelle inner membrane (GO:0019866);; Cellular Component: intrinsic component of membrane (GO:0031224);;	--	--	[C]	Energy production and conversion	Mitochondrial carrier protein	sp|F4JU70|COAC2_ARATH Mitochondrial carrier protein CoAc2 OS=Arabidopsis thaliana OX=3702 GN=COAC2 PE=2 SV=1	C	Energy production and conversion	PREDICTED: graves disease carrier protein homolog isoform X1 [Cucumis melo]
Cla97C06G127030	1558	3389	4142	1007	2508	1516	16.0372	22.7331	31.327	7.78773	15.0047	10.4321	0.00195434	-1.20025	down	[T]	Signal transduction mechanisms	Molecular Function: protein kinase activity (GO:0004672);; Biological Process: cellular protein modification process (GO:0006464);; Cellular Component: intrinsic component of membrane (GO:0031224);; Molecular Function: purine ribonucleoside binding (GO:0032550);;	--	--	--	--	Legume lectin domain;; Protein kinase domain;; Protein tyrosine and serine/threonine kinase	sp|Q9M9E0|LRKS1_ARATH L-type lectin-domain containing receptor kinase S.1 OS=Arabidopsis thaliana OX=3702 GN=LECRKS1 PE=1 SV=1	T	Signal transduction mechanisms	PREDICTED: L-type lectin-domain containing receptor kinase S.1 [Cucumis melo]
Cla97C08G157010	124	334	329	5	82	93	4.63005	8.13057	9.03145	0.125785	1.76557	2.31289	0.00450053	-2.47013	down	--	--	Molecular Function: nucleic acid binding transcription factor activity (GO:0001071);; Molecular Function: nucleic acid binding (GO:0003676);; Biological Process: transcription, DNA-templated (GO:0006351);; Cellular Component: intracellular membrane-bounded organelle (GO:0043231);;	--	--	--	--	AP2 domain	sp|Q94AW5|ERF03_ARATH Ethylene-responsive transcription factor ERF003 OS=Arabidopsis thaliana OX=3702 GN=ERF003 PE=2 SV=1	K	Transcription	ethylene-responsive transcription factor ERF003-like protein [Cucumis melo var. makuwa]
Cla97C01G008530	1104	978	3129	26	63	51	23.684	13.6745	49.3488	0.414529	0.783022	0.730552	4.19e-23	-5.61694	down	--	--	Molecular Function: transition metal ion binding (GO:0046914);;	K11982|7.77609e-153|csv:101214831|E3 ubiquitin-protein ligase RING1-like	--	[O]	Posttranslational modification, protein turnover, chaperones	Ring finger domain;; zinc-ribbon;; Zinc finger, C3HC4 type (RING finger);; RING-like zinc finger;; RING-H2 zinc finger domain;; Zinc finger, C3HC4 type (RING finger)	sp|Q8LPN7|RNG1L_ARATH E3 ubiquitin-protein ligase RING1-like OS=Arabidopsis thaliana OX=3702 GN=At3g19950 PE=1 SV=1	O	Posttranslational modification, protein turnover, chaperones	PREDICTED: E3 ubiquitin-protein ligase RING1-like [Cucumis sativus]
Cla97C11G214530	890	1878	3449	1053	1251	625	19.4613	26.7823	55.4608	17.3042	15.9114	9.14216	0.00532732	-1.39321	down	--	--	Molecular Function: catalytic activity (GO:0003824);; Biological Process: response to stress (GO:0006950);; Molecular Function: antioxidant activity (GO:0016209);; Biological Process: hydrogen peroxide metabolic process (GO:0042743);; Molecular Function: cation binding (GO:0043169);; Biological Process: single-organism metabolic process (GO:0044710);; Molecular Function: tetrapyrrole binding (GO:…	K00430|0|cmo:103485477|peroxidase 55-like	Phenylpropanoid biosynthesis (ko00940)	--	--	Peroxidase	sp|Q96509|PER55_ARATH Peroxidase 55 OS=Arabidopsis thaliana OX=3702 GN=PER55 PE=1 SV=1	Q	Secondary metabolites biosynthesis, transport and catabolism	PREDICTED: peroxidase 55-like [Cucumis melo]
Cla97C02G032220	305	2271	3011	176	365	188	4.05507	19.7002	29.4474	1.7581	2.8217	1.66881	1.7e-06	-3.21836	down	[G]	Carbohydrate transport and metabolism	Biological Process: transport (GO:0006810);; Molecular Function: transmembrane transporter activity (GO:0022857);; Cellular Component: intrinsic component of membrane (GO:0031224);;	--	--	[R]	General function prediction only	Sugar (and other) transporter;; Major Facilitator Superfamily;; Fungal trichothecene efflux pump (TRI12)	sp|Q9XIH7|PLT1_ARATH Putative polyol transporter 1 OS=Arabidopsis thaliana OX=3702 GN=PLT1 PE=3 SV=1	U	Intracellular trafficking, secretion, and vesicular transport	PREDICTED: putative polyol transporter 1 isoform X1 [Cucumis sativus]
Cla97C09G177870	1001	2130	4316	1041	1395	1020	35.818	49.6572	113.467	27.9854	29.0065	24.3867	0.00377258	-1.41849	down	--	--	Molecular Function: phosphoprotein phosphatase activity (GO:0004721);; Biological Process: protein dephosphorylation (GO:0006470);;	K17619|7.15786e-121|cmos:111434698|magnesium-dependent phosphatase 1	--	[R]	General function prediction only	Acid Phosphatase;; Haloacid dehalogenase-like hydrolase	sp|Q9D967|MGDP1_MOUSE Magnesium-dependent phosphatase 1 OS=Mus musculus OX=10090 GN=Mdp1 PE=1 SV=1	S	Function unknown	magnesium-dependent phosphatase 1 [Cucurbita moschata]
Cla97C06G119170	826	666	2008	172	206	234	23.953	12.5984	42.8067	3.74455	3.4689	4.52362	1.95e-08	-2.87861	down	[J]	Translation, ribosomal structure and biogenesis	Molecular Function: small molecule binding (GO:0036094);; Molecular Function: organic cyclic compound binding (GO:0097159);;	--	--	[R]	General function prediction only	RNA recognition motif. (a.k.a. RRM, RBD, or RNP domain)	sp|Q6AXT7|RBM42_RAT RNA-binding protein 42 OS=Rattus norvegicus OX=10116 GN=Rbm42 PE=1 SV=2	A	RNA processing and modification	RNA-binding protein [Actinidia chinensis var. chinensis]
Cla97C05G085470	5927	455	1522	168	149	7	556.714	27.8528	105.045	11.8498	8.11262	0.416061	5.43e-06	-5.19145	down	--	--	Molecular Function: endopeptidase inhibitor activity (GO:0004866);; Biological Process: response to stress (GO:0006950);; Biological Process: negative regulation of peptidase activity (GO:0010466);;	--	--	--	--	Potato inhibitor I family	sp|P19873|ITH5_CUCMA Inhibitor of trypsin and hageman factor OS=Cucurbita maxima OX=3661 PE=1 SV=1	S	Function unknown	hypothetical protein Csa_010510 [Cucumis sativus]
Cla97C01G013770	853	4741	10813	1046	1089	814	26.8037	97.1931	249.915	24.716	19.913	17.1184	0.000133898	-2.73231	down	--	--	--	--	--	--	--	GRAM domain	sp|Q9FTA0|GEML4_ARATH GEM-like protein 4 OS=Arabidopsis thaliana OX=3702 GN=At5g08350 PE=2 SV=1	S	Function unknown	PREDICTED: GEM-like protein 4 isoform X1 [Cucumis melo]
Cla97C09G172340	904	2165	2913	760	1394	1105	18.3471	28.6505	43.4615	11.5965	16.4557	14.9969	0.00289432	-1.19146	down	--	--	--	--	--	[S]	Function unknown	Domain of unknown function (DUF383);; Domain of unknown function (DUF384)	sp|Q8C3I8|HGH1_MOUSE Protein HGH1 homolog OS=Mus musculus OX=10090 GN=Hgh1 PE=1 SV=1	S	Function unknown	PREDICTED: protein HGH1 homolog isoform X1 [Cucumis melo]
Cla97C05G093730	6800	11334	5509	4065	4152	4059	240.762	261.547	143.309	108.154	85.4664	96.0916	1.91e-05	-1.24464	down	--	--	--	K19032|3.92469e-106|csv:101207757|30S ribosomal protein 3, chloroplastic	--	--	--	Plastid and cyanobacterial ribosomal protein (PSRP-3 / Ycf65)	sp|P82412|RRP3_SPIOL 30S ribosomal protein 3, chloroplastic OS=Spinacia oleracea OX=3562 GN=PSRP3 PE=1 SV=1	J	Translation, ribosomal structure and biogenesis	PREDICTED: 30S ribosomal protein 3, chloroplastic-like [Cucumis melo]
Cla97C01G008630	803	1357	1103	722	786	475	29.3284	32.3171	29.6043	19.8272	16.695	11.599	0.000163463	-1.02901	down	--	--	Cellular Component: photosystem II (GO:0009523);; Biological Process: cellular metabolic process (GO:0044237);; Molecular Function: metal ion binding (GO:0046872);;	--	--	--	--	Oxygen evolving enhancer protein 3 (PsbQ)	sp|Q2V4B2|PQL3_ARATH PsbQ-like protein 3, chloroplastic OS=Arabidopsis thaliana OX=3702 GN=PQL3 PE=2 SV=1	S	Function unknown	PREDICTED: psbQ-like protein 3, chloroplastic [Cucumis sativus]
Cla97C07G132440	865	1615	1789	734	1160	652	56.7926	69.0887	86.3138	36.183	44.2722	28.6225	0.000273876	-1.07708	down	--	--	--	K12947|5.75755e-62|cmo:103501424|probable signal peptidase complex subunit 2	Protein export (ko03060)	--	--	Microsomal signal peptidase 25 kDa subunit (SPC25)	sp|P58684|SPCS2_ARATH Probable signal peptidase complex subunit 2 OS=Arabidopsis thaliana OX=3702 GN=At2g39960 PE=2 SV=1	S	Function unknown	hypothetical protein Csa_021450 [Cucumis sativus]
Cla97C05G100740	564	1149	881	128	692	188	11.0828	14.7155	12.7174	1.87839	7.90765	2.45897	0.00156064	-1.77919	down	[M]	Cell wall/membrane/envelope biogenesis	Molecular Function: transferase activity (GO:0016740);;	K20893|0|cmo:103503979|probable galacturonosyltransferase-like 1	--	--	--	Glycosyl transferase family 8	sp|Q9LN68|GATL1_ARATH Probable galacturonosyltransferase-like 1 OS=Arabidopsis thaliana OX=3702 GN=GATL1 PE=2 SV=1	G	Carbohydrate transport and metabolism	PREDICTED: probable galacturonosyltransferase-like 1 [Cucumis melo]
Cla97C06G117230	4799	13611	15690	5800	7549	5304	64.78	119.742	155.623	58.8307	59.2472	47.8683	0.00257917	-1.15128	down	[P]	Inorganic ion transport and metabolism	Molecular Function: cation transmembrane transporter activity (GO:0008324);; Biological Process: ammonium transport (GO:0015696);; Cellular Component: intrinsic component of membrane (GO:0031224);;	K03320|0|csv:101212168|ammonium transporter 1 member 1	--	[P]	Inorganic ion transport and metabolism	Ammonium Transporter Family	sp|P54144|AMT11_ARATH Ammonium transporter 1 member 1 OS=Arabidopsis thaliana OX=3702 GN=AMT1-1 PE=1 SV=1	P	Inorganic ion transport and metabolism	PREDICTED: ammonium transporter 1 member 1 [Cucumis sativus]
Cla97C03G063250	382	1575	1543	262	296	322	12.6008	33.8613	37.4025	6.49073	5.66033	7.08198	2.16e-06	-2.22807	down	[S]	Function unknown	--	K13449|1.23016e-80|cmos:111461344|pathogenesis-related protein PRB1-3-like	MAPK signaling pathway - plant (ko04016);; Plant hormone signal transduction (ko04075);; Plant-pathogen interaction (ko04626)	[S]	Function unknown	Cysteine-rich secretory protein family	sp|P33154|PR1_ARATH Pathogenesis-related protein 1 OS=Arabidopsis thaliana OX=3702 GN=At2g14610 PE=1 SV=1	L	Replication, recombination and repair	pathogenesis-related protein PRB1-3-like [Cucurbita moschata]
Cla97C06G118090	4611	4773	2568	1618	3080	2838	52.2341	35.2362	21.3748	13.7671	20.2853	21.4961	0.00630836	-1.06506	down	[E]	Amino acid transport and metabolism	Biological Process: sulfur amino acid metabolic process (GO:0000096);; Biological Process: one-carbon metabolic process (GO:0006730);; Molecular Function: oxidoreductase activity, acting on the CH-NH group of donors, NAD or NADP as acceptor (GO:0016646);;	K00297|0|mcha:111022964|methylenetetrahydrofolate reductase 2-like	One carbon pool by folate (ko00670);; Carbon metabolism (ko01200)	[E]	Amino acid transport and metabolism	Methylenetetrahydrofolate reductase	sp|O80585|MTHR2_ARATH Methylenetetrahydrofolate reductase 2 OS=Arabidopsis thaliana OX=3702 GN=MTHFR2 PE=1 SV=2	E	Amino acid transport and metabolism	methylenetetrahydrofolate reductase 2 [Cucumis melo var. makuwa]
Cla97C07G133760	34	146	227	35	71	31	0.358705	1.0254	1.79609	0.277963	0.444459	0.223528	0.00752538	-1.88	down	--	--	--	K21777|0|cmos:111447707|cyclin-SDS-like	--	[D]	Cell cycle control, cell division, chromosome partitioning	Cyclin, N-terminal domain;; Cyclin, C-terminal domain	sp|Q1PFW3|CCSDS_ARATH Cyclin-SDS OS=Arabidopsis thaliana OX=3702 GN=SDS PE=1 SV=2	D	Cell cycle control, cell division, chromosome partitioning	cyclin-SDS-like [Cucurbita moschata]
Cla97C09G172330	2297	6988	10950	775	2105	1047	39.8329	78.9765	139.528	10.091	21.2154	12.1341	3.64e-07	-2.70679	down	--	--	Molecular Function: nucleic acid binding transcription factor activity (GO:0001071);; Molecular Function: DNA binding (GO:0003677);; Biological Process: transcription, DNA-templated (GO:0006351);;	--	--	--	--	WRKY DNA -binding domain	sp|Q9SKD9|WRK46_ARATH Probable WRKY transcription factor 46 OS=Arabidopsis thaliana OX=3702 GN=WRKY46 PE=1 SV=1	K	Transcription	putative WRKY transcription factor 53 [Cucumis melo var. makuwa]
Cla97C02G026370	117	101	306	26	45	31	3.52445	1.97981	6.77135	0.577335	0.778039	0.610202	4.98e-06	-2.74956	down	--	--	--	K09422|3.34031e-125|csv:101216185|myb-related protein 330	--	[K]	Transcription	Myb-like DNA-binding domain;; Myb-like DNA-binding domain	sp|Q9SZP1|MYB4_ARATH Transcription repressor MYB4 OS=Arabidopsis thaliana OX=3702 GN=MYB4 PE=1 SV=1	K	Transcription	PREDICTED: myb-related protein 330-like [Cucumis sativus]
Cla97C02G045540	145	359	266	80	150	108	3.11451	5.04182	4.22199	1.29743	1.87827	1.55877	8.67e-06	-1.4941	down	[H]	Coenzyme transport and metabolism	Biological Process: coenzyme biosynthetic process (GO:0009108);; Biological Process: water-soluble vitamin biosynthetic process (GO:0042364);;	K06215|0|cmo:103502019|probable pyridoxal 5'-phosphate synthase subunit PDX1	Vitamin B6 metabolism (ko00750);; Biosynthesis of cofactors (ko01240)	[H]	Coenzyme transport and metabolism	SOR/SNZ family;; Thiazole biosynthesis protein ThiG;; Dihydrouridine synthase (Dus)	sp|Q39963|PDX1_HEVBR Probable pyridoxal 5&apos;-phosphate synthase subunit PDX1 OS=Hevea brasiliensis OX=3981 GN=PDX1 PE=2 SV=1	H	Coenzyme transport and metabolism	PREDICTED: probable pyridoxal 5&apos;-phosphate synthase subunit PDX1 [Cucumis melo]
Cla97C09G163300	3660	5644	7041	1065	2773	2874	121.323	121.947	171.5	26.5233	53.4396	63.6908	4.89e-05	-1.6426	down	[O]	Posttranslational modification, protein turnover, chaperones	--	--	--	[O]	Posttranslational modification, protein turnover, chaperones	DnaJ domain	sp|Q4R7Y5|DNJB6_MACFA DnaJ homolog subfamily B member 6 OS=Macaca fascicularis OX=9541 GN=DNAJB6 PE=2 SV=1	O	Posttranslational modification, protein turnover, chaperones	PREDICTED: dnaJ homolog subfamily B member 6-like [Cucumis melo]
Cla97C03G054940	49	281	802	9	71	15	0.95714	3.60381	11.6174	0.120598	0.813766	0.185187	5.88e-05	-3.98986	down	[E]	Amino acid transport and metabolism	--	--	--	[H]	Coenzyme transport and metabolism	--	sp|Q8IU29|MOCOS_BOMMO Molybdenum cofactor sulfurase OS=Bombyx mori OX=7091 GN=mal PE=2 SV=1	H	Coenzyme transport and metabolism	PREDICTED: uncharacterized protein LOC101219770 [Cucumis sativus]
Cla97C08G154650	332	1035	1062	346	512	390	10.5672	21.5066	24.873	8.29295	9.48386	8.29746	0.00168394	-1.2401	down	--	--	Cellular Component: intrinsic component of membrane (GO:0031224);;	--	--	--	--	Tetratricopeptide repeat;; Tetratricopeptide repeat	--	S	Function unknown	PREDICTED: uncharacterized protein LOC103488119 [Cucumis melo]
Cla97C02G043390	2646	4637	3242	1762	1942	2710	63.2347	72.2182	56.9232	31.6241	26.9818	43.299	0.000283213	-1.00825	down	[H]	Coenzyme transport and metabolism	Biological Process: riboflavin metabolic process (GO:0006771);; Cellular Component: plastid (GO:0009536);; Molecular Function: transferase activity, transferring alkyl or aryl (other than methyl) groups (GO:0016765);;	K00793|1.84717e-174|cpep:111777808|riboflavin synthase-like	Riboflavin metabolism (ko00740);; Biosynthesis of cofactors (ko01240)	[H]	Coenzyme transport and metabolism	Lumazine binding domain	sp|Q9Y7P0|RISA_SCHPO Riboflavin synthase OS=Schizosaccharomyces pombe (strain 972 / ATCC 24843) OX=284812 GN=rib5 PE=1 SV=1	H	Coenzyme transport and metabolism	riboflavin synthase-like [Cucurbita pepo subsp. pepo]
Cla97C03G065750	185	273	842	61	165	61	2.42209	2.32361	8.1041	0.599743	1.25678	0.534228	0.000104318	-2.57737	down	--	--	--	--	--	--	--	Helix-loop-helix DNA-binding domain	sp|Q9LTS4|BH041_ARATH Putative transcription factor bHLH041 OS=Arabidopsis thaliana OX=3702 GN=BHLH41 PE=3 SV=1	K	Transcription	PREDICTED: putative transcription factor bHLH041 isoform X1 [Cucumis sativus]
Cla97C11G208200	3154	4384	3388	1439	1770	2174	69.7029	63.1369	55.0096	23.8835	22.7412	32.1129	5.82e-08	-1.34958	down	[H]	Coenzyme transport and metabolism	Biological Process: metabolic process (GO:0008152);; Cellular Component: plastid (GO:0009536);; Molecular Function: transferase activity, transferring one-carbon groups (GO:0016741);;	--	--	--	--	Methyltransferase domain;; Methyltransferase domain;; ubiE/COQ5 methyltransferase family	sp|B7HHR7|MENG_BACC4 Demethylmenaquinone methyltransferase OS=Bacillus cereus (strain B4264) OX=405532 GN=menG PE=3 SV=1	S	Function unknown	uncharacterized protein LOC111804930 [Cucurbita pepo subsp. pepo]
Cla97C09G167720	10171	27242	31620	5693	8378	6566	190.016	331.698	434.069	79.9128	90.9982	82.0193	2.01e-08	-2.03319	down	[O]	Posttranslational modification, protein turnover, chaperones	Biological Process: developmental process involved in reproduction (GO:0003006);; Cellular Component: cell wall (GO:0005618);; Biological Process: fertilization (GO:0009566);; Molecular Function: intramolecular oxidoreductase activity, transposing S-S bonds (GO:0016864);; Biological Process: cellular homeostasis (GO:0019725);; Cellular Component: vacuolar part (GO:0044437);; Biological Process: g…	K09584|0|cmo:103492772|probable protein disulfide-isomerase A6	Protein processing in endoplasmic reticulum (ko04141)	[O]	Posttranslational modification, protein turnover, chaperones	Thioredoxin;; Endoplasmic reticulum protein ERp29, C-terminal domain;; OST3 / OST6 family, transporter family;; Thioredoxin-like domain;; AhpC/TSA family;; Thioredoxin-like domain;; Thioredoxin-like;; Thioredoxin-like	sp|P38661|PDIA6_MEDSA Probable protein disulfide-isomerase A6 OS=Medicago sativa OX=3879 PE=2 SV=1	O	Posttranslational modification, protein turnover, chaperones	putative protein disulfide-isomerase A6 [Cucumis melo var. makuwa]
Cla97C10G203890	4403	8912	15641	4752	7313	4386	23.0448	30.4029	60.1582	18.6894	22.2561	15.3506	0.0087628	-1.14184	down	[O]	Posttranslational modification, protein turnover, chaperones	--	--	--	[U]	Intracellular trafficking, secretion, and vesicular transport	Rab-GTPase-TBC domain;; Glutathione S-transferase, N-terminal domain;; Glutathione S-transferase, N-terminal domain;; Glutathione S-transferase, C-terminal domain;; Glutathione S-transferase, N-terminal domain;; Glutathione S-transferase, C-terminal domain;; Glutathione S-transferase, C-terminal domain	sp|Q9LZ06|GSTL3_ARATH Glutathione S-transferase L3 OS=Arabidopsis thaliana OX=3702 GN=GSTL3 PE=2 SV=1	U	Intracellular trafficking, secretion, and vesicular transport	PREDICTED: ecotropic viral integration site 5 protein homolog isoform X3 [Cucumis melo]
Cla97C04G075570	456	552	266	100	227	165	40.026	31.5415	17.141	6.54427	11.5529	9.66261	2.99e-05	-1.76714	down	--	--	Molecular Function: nucleic acid binding (GO:0003676);; Biological Process: transcription, DNA-templated (GO:0006351);; Cellular Component: intrinsic component of membrane (GO:0031224);; Cellular Component: intracellular membrane-bounded organelle (GO:0043231);;	--	--	--	--	DNA binding protein S1FA	--	J	Translation, ribosomal structure and biogenesis	DNA-binding protein S1FA-like [Cucurbita maxima]
Cla97C10G187590	6560	19194	17964	7002	7453	7618	293.808	560.274	591.199	235.658	194.071	228.117	0.000360534	-1.23963	down	--	--	--	--	--	--	--	Probable lipid transfer	--	S	Function unknown	non-specific lipid-transfer protein 1 [Cucumis melo var. makuwa]
Cla97C01G019520	271	314	268	73	81	69	10.772	8.12606	7.82761	2.16817	1.86872	1.82068	3.57e-14	-2.28516	down	--	--	--	--	--	--	--	B-box zinc finger	sp|C0SVM5|BBX19_ARATH B-box zinc finger protein 19 OS=Arabidopsis thaliana OX=3702 GN=BBX19 PE=1 SV=1	S	Function unknown	PREDICTED: B-box zinc finger protein 18 isoform X1 [Cucumis sativus]
Cla97C01G018340	5235	6940	3902	1803	3154	2332	196.684	169.924	107.723	50.8986	68.891	58.5744	1.25e-07	-1.5094	down	--	--	--	--	--	--	--	PLAT/LH2 domain;; Embryo-specific protein 3, (ATS3)	sp|O65660|PLAT1_ARATH PLAT domain-containing protein 1 OS=Arabidopsis thaliana OX=3702 GN=PLAT1 PE=1 SV=1	S	Function unknown	PREDICTED: lipoxygenase homology domain-containing protein 1 [Cucumis melo]
Cla97C10G202100	593	1121	1148	482	702	388	15.7853	19.4509	22.4508	9.64049	10.8561	6.90514	4.63e-05	-1.18857	down	--	--	Cellular Component: intrinsic component of membrane (GO:0031224);;	K20363|2.74456e-157|csv:101206007|protein YIPF5 homolog	--	[U]	Intracellular trafficking, secretion, and vesicular transport	Yip1 domain	sp|Q66KA5|YIPF5_XENTR Protein YIPF5 OS=Xenopus tropicalis OX=8364 GN=yipf5 PE=2 SV=1	U	Intracellular trafficking, secretion, and vesicular transport	PREDICTED: protein YIPF5 homolog [Cucumis sativus]
Cla97C01G000400	639	339	348	7	20	208	55.3411	19.1079	22.1566	0.411348	0.994938	12.0148	0.00771449	-2.90884	down	--	--	--	--	--	--	--	--	--	--	--	protein PSY2 [Momordica charantia]
Cla97C06G124540	56	222	322	41	90	44	2.49016	6.51856	10.6561	1.37922	2.3524	1.3156	0.00108089	-2.0898	down	--	--	Cellular Component: membrane (GO:0016020);;	--	--	--	--	--	--	68		hypothetical protein E5676_scaffold629G00220 [Cucumis melo var. makuwa]
Cla97C02G040040	1642	3028	3170	1044	1680	1809	34.0542	40.9348	48.3079	16.2739	20.2521	25.0806	0.000150141	-1.10771	down	[M]	Cell wall/membrane/envelope biogenesis	Molecular Function: catalytic activity (GO:0003824);; Biological Process: nucleotide-sugar metabolic process (GO:0009225);; Biological Process: single-organism metabolic process (GO:0044710);; Molecular Function: cofactor binding (GO:0048037);;	K02377|0|cmo:103493500|putative GDP-L-fucose synthase 2	Fructose and mannose metabolism (ko00051);; Amino sugar and nucleotide sugar metabolism (ko00520)	[GO]	Carbohydrate transport and metabolism;; Posttranslational modification, protein turnover, chaperones	NAD dependent epimerase/dehydratase family;; GDP-mannose 4,6 dehydratase;; RmlD substrate binding domain	sp|Q9LMU0|FCL2_ARATH Putative GDP-L-fucose synthase 2 OS=Arabidopsis thaliana OX=3702 GN=GER2 PE=1 SV=1	GO	Carbohydrate transport and metabolism;; Posttranslational modification, protein turnover, chaperones	PREDICTED: putative GDP-L-fucose synthase 2 [Cucumis melo]
Cla97C08G160790	773	1141	1087	235	563	423	10.7255	10.3189	11.0887	2.44658	4.54048	3.92433	2.96e-08	-1.6675	down	[S]	Function unknown	--	--	--	--	--	--	sp|O82645|IQM1_ARATH IQ domain-containing protein IQM1 OS=Arabidopsis thaliana OX=3702 GN=IQM1 PE=1 SV=1	S	Function unknown	PREDICTED: IQ domain-containing protein IQM4 [Cucumis melo]
Cla97C01G008490	335	3112	7195	46	254	62	2.17758	13.1885	34.3795	0.223906	0.959745	0.267193	8.49e-09	-5.25958	down	[P]	Inorganic ion transport and metabolism	Molecular Function: protein binding (GO:0005515);; Biological Process: calcium ion transport (GO:0006816);; Molecular Function: cation-transporting ATPase activity (GO:0019829);; Cellular Component: intrinsic component of membrane (GO:0031224);; Molecular Function: purine ribonucleoside binding (GO:0032550);; Molecular Function: cation binding (GO:0043169);;	K01537|0|cmo:103501344|putative calcium-transporting ATPase 11, plasma membrane-type	--	[P]	Inorganic ion transport and metabolism	E1-E2 ATPase;; Cation transporting ATPase, C-terminus;; haloacid dehalogenase-like hydrolase;; Ca2+-ATPase N terminal autoinhibitory domain;; Cation transport ATPase (P-type);; Cation transporter/ATPase, N-terminus;; haloacid dehalogenase-like hydrolase	sp|Q9M2L4|ACA11_ARATH Putative calcium-transporting ATPase 11, plasma membrane-type OS=Arabidopsis thaliana OX=3702 GN=ACA11 PE=1 SV=1	P	Inorganic ion transport and metabolism	PREDICTED: putative calcium-transporting ATPase 11, plasma membrane-type [Cucumis melo]
Cla97C05G089090	348	1047	652	263	450	380	1.99958	3.92032	2.75235	1.1328	1.50269	1.45637	0.000432217	-1.18163	down	[D]	Cell cycle control, cell division, chromosome partitioning	Biological Process: mitotic sister chromatid segregation (GO:0000070);; Cellular Component: condensed chromosome (GO:0000793);; Molecular Function: purine ribonucleoside binding (GO:0032550);; Cellular Component: intracellular membrane-bounded organelle (GO:0043231);;	K06674|0|cmo:103483977|structural maintenance of chromosomes protein 2-1-like	--	[BD]	Chromatin structure and dynamics;; Cell cycle control, cell division, chromosome partitioning	RecF/RecN/SMC N terminal domain;; SMC proteins Flexible Hinge Domain;; AAA domain, putative AbiEii toxin, Type IV TA system	sp|Q9C5Y4|SMC21_ARATH Structural maintenance of chromosomes protein 2-1 OS=Arabidopsis thaliana OX=3702 GN=SMC2-1 PE=2 SV=2	BD	Chromatin structure and dynamics;; Cell cycle control, cell division, chromosome partitioning	structural maintenance of chromosomes protein 2-1-like [Cucumis melo var. makuwa]
Cla97C05G082220	44	85	62	6	29	6	1.58057	1.99078	1.63725	0.140623	0.600131	0.124395	0.000407475	-2.62457	down	--	--	--	--	--	--	--	C2 domain	sp|Q58FX0|BAP2_ARATH BON1-associated protein 2 OS=Arabidopsis thaliana OX=3702 GN=BAP2 PE=1 SV=1	S	Function unknown	BON1-associated protein 2-like [Cucurbita pepo subsp. pepo]
Cla97C07G143380	7547	21154	7130	5413	6945	3900	614.959	1123.35	426.881	331.406	328.971	212.447	0.000515223	-1.40016	down	--	--	--	--	--	--	--	Probable lipid transfer;; Protease inhibitor/seed storage/LTP family	sp|Q43681|NLTP_VIGUN Probable non-specific lipid-transfer protein AKCS9 OS=Vigna unguiculata OX=3917 PE=2 SV=1	S	Function unknown	non-specific lipid-transfer protein 2-like [Cucurbita moschata]
Cla97C01G019240	751	5447	8160	73	427	154	10.3323	48.8927	82.5794	0.746136	3.41716	1.41039	7.69e-10	-4.81093	down	[MDT]	Cell wall/membrane/envelope biogenesis;; Cell cycle control, cell division, chromosome partitioning;; Signal transduction mechanisms	Molecular Function: purine ribonucleoside binding (GO:0032550);;	K08900|0|csv:101205613|AAA-ATPase At3g50940	--	[O]	Posttranslational modification, protein turnover, chaperones	Domain associated at C-terminal with AAA;; ATPase family associated with various cellular activities (AAA);; Holliday junction DNA helicase RuvB P-loop domain	sp|Q8VZG2|HSR4_ARATH Protein HYPER-SENSITIVITY-RELATED 4 OS=Arabidopsis thaliana OX=3702 GN=HSR4 PE=2 SV=1	O	Posttranslational modification, protein turnover, chaperones	PREDICTED: uncharacterized protein LOC101205613 [Cucumis sativus]
Cla97C01G003830	542	1451	785	426	507	392	6.98806	12.2026	7.43866	4.12874	3.80051	3.37488	9.4e-06	-1.33114	down	[QV]	Secondary metabolites biosynthesis, transport and catabolism;; Defense mechanisms	Molecular Function: oxidoreductase activity (GO:0016491);; Cellular Component: intrinsic component of membrane (GO:0031224);; Biological Process: single-organism metabolic process (GO:0044710);; Molecular Function: tetrapyrrole binding (GO:0046906);; Molecular Function: transition metal ion binding (GO:0046914);;	--	--	[Q]	Secondary metabolites biosynthesis, transport and catabolism	Cytochrome P450	sp|Q9SD85|F3PH_ARATH Flavonoid 3&apos;-monooxygenase OS=Arabidopsis thaliana OX=3702 GN=CYP75B1 PE=1 SV=1	Q	Secondary metabolites biosynthesis, transport and catabolism	PREDICTED: flavonoid 3&apos;-monooxygenase-like [Cucumis sativus]
Cla97C05G098460	7301	11540	30183	4293	7860	7335	160.312	165.137	486.987	70.8354	100.337	107.684	0.00150104	-1.67494	down	--	--	Molecular Function: transition metal ion binding (GO:0046914);;	K10144|0|csv:101203062|probable E3 ubiquitin-protein ligase RZFP34	Ubiquitin mediated proteolysis (ko04120)	[R]	General function prediction only	Zinc-ribbon;; CHY zinc finger;; Ring finger domain;; zinc-RING finger domain;; Zinc finger, C3HC4 type (RING finger);; RING-type zinc-finger	sp|Q5JL96|ZFP34_ORYSJ Probable E3 ubiquitin-protein ligase RZFP34 OS=Oryza sativa subsp. japonica OX=39947 GN=RZFP34 PE=2 SV=1	O	Posttranslational modification, protein turnover, chaperones	PREDICTED: E3 ubiquitin-protein ligase MIEL1 isoform X2 [Cucumis melo]
Cla97C10G201940	397	1001	949	194	378	301	9.30009	15.3053	16.3644	3.41589	5.15243	4.71524	5.97e-07	-1.73497	down	--	--	--	--	--	--	--	--	--	466		PREDICTED: uncharacterized protein LOC101204080 [Cucumis sativus]
Cla97C07G132070	469	1182	4436	370	460	491	20.7116	34.0357	144.082	12.2764	11.8033	14.4994	0.000470971	-2.50369	down	--	--	--	--	--	--	--	--	--	S	Function unknown	PREDICTED: uncharacterized protein LOC103502653 [Cucumis melo]
Cla97C03G056280	2264	18760	34778	738	3531	1041	24.4997	132.298	276.525	5.99305	22.2093	7.52664	4.97e-06	-3.75512	down	[T]	Signal transduction mechanisms	Molecular Function: kinase activity (GO:0016301);;	--	--	--	--	Protein tyrosine and serine/threonine kinase;; Protein kinase domain;; Salt stress response/antifungal	sp|Q9LDN1|CRK33_ARATH Putative cysteine-rich receptor-like protein kinase 33 OS=Arabidopsis thaliana OX=3702 GN=CRK33 PE=3 SV=1	T	Signal transduction mechanisms	cysteine-rich receptor-like protein kinase 28 [Cucumis melo var. makuwa]
Cla97C06G122770	360	656	554	189	275	431	9.11304	10.814	10.2999	3.58096	4.04268	7.29731	0.00364998	-1.11335	down	--	--	--	--	--	--	--	--	--	416		PREDICTED: uncharacterized protein LOC103494265 [Cucumis melo]
Cla97C04G068990	3752	6440	8822	3901	2905	3392	49.5615	55.4327	85.6262	38.7143	22.3089	29.9579	0.00164405	-1.1752	down	[O]	Posttranslational modification, protein turnover, chaperones	Biological Process: protein metabolic process (GO:0019538);; Molecular Function: peptidase activity, acting on L-amino acid peptides (GO:0070011);;	K03797|0|cmo:103486149|carboxyl-terminal-processing peptidase 3, chloroplastic	--	--	--	Peptidase family S41;; PDZ domain;; PDZ domain;; PDZ domain	sp|F4J3G5|CTPA3_ARATH Carboxyl-terminal-processing peptidase 3, chloroplastic OS=Arabidopsis thaliana OX=3702 GN=CTPA3 PE=3 SV=1	M	Cell wall/membrane/envelope biogenesis	PREDICTED: carboxyl-terminal-processing peptidase 3, chloroplastic isoform X1 [Cucumis melo]
Cla97C01G011470	58	1070	1199	179	212	90	1.60172	19.5666	24.7188	3.75585	3.45605	1.67896	0.00346434	-2.48737	down	--	--	Molecular Function: nucleic acid binding (GO:0003676);; Biological Process: transcription, DNA-templated (GO:0006351);; Cellular Component: intracellular membrane-bounded organelle (GO:0043231);;	--	--	--	--	No apical meristem (NAM) protein	sp|Q9FMR3|NAC90_ARATH NAC domain-containing protein 90 OS=Arabidopsis thaliana OX=3702 GN=NAC090 PE=1 SV=1	K	Transcription	PREDICTED: NAC domain-containing protein 90-like [Cucumis melo]
Cla97C07G142440	89	802	718	150	179	100	8.66639	51.1856	51.6777	10.9828	10.1484	6.53572	0.00173046	-2.12001	down	--	--	Cellular Component: intrinsic component of membrane (GO:0031224);;	--	--	--	--	Protein of unknown function (DUF3339)	--	S	Function unknown	uncharacterized protein LOC111470766 [Cucurbita maxima]
Cla97C01G021800	934	2153	1941	737	1115	1118	18.1856	27.3356	27.7885	10.7922	12.6271	14.5584	0.000255162	-1.05396	down	--	--	Cellular Component: intrinsic component of membrane (GO:0031224);;	K12669|0|cmo:103484594|probable dolichyl-diphosphooligosaccharide--protein glycosyltransferase subunit 3B	N-Glycan biosynthesis (ko00510);; Various types of N-glycan biosynthesis (ko00513);; Protein processing in endoplasmic reticulum (ko04141)	[O]	Posttranslational modification, protein turnover, chaperones	OST3 / OST6 family, transporter family	sp|Q9SYB5|OST3B_ARATH Probable dolichyl-diphosphooligosaccharide--protein glycosyltransferase subunit 3B OS=Arabidopsis thaliana OX=3702 GN=OST3B PE=2 SV=1	O	Posttranslational modification, protein turnover, chaperones	putative dolichyl-diphosphooligosaccharide--protein glycosyltransferase subunit 3B [Cucumis melo var. makuwa]
Cla97C01G009580	3493	6128	19442	2936	5040	3456	90.8433	103.879	371.602	57.3877	76.2064	60.1043	0.00444161	-1.68959	down	--	--	--	--	--	--	--	Phloem protein 2	sp|C0HJV2|LEC_LUFAC Lectin OS=Luffa acutangula OX=56866 PE=1 SV=1	L	Replication, recombination and repair	PREDICTED: protein PHLOEM PROTEIN 2-LIKE A1 [Cucumis sativus]
Cla97C11G224920	1007	2308	4195	698	1394	963	24.7442	36.9799	75.8036	12.8815	19.9284	15.8192	0.000761999	-1.62974	down	--	--	Molecular Function: nucleic acid binding (GO:0003676);; Cellular Component: intracellular membrane-bounded organelle (GO:0043231);;	--	--	--	--	Homeodomain	sp|Q5QMM3|WOX8_ORYSJ WUSCHEL-related homeobox 8 OS=Oryza sativa subsp. japonica OX=39947 GN=WOX8 PE=2 SV=1	K	Transcription	PREDICTED: WUSCHEL-related homeobox 8-like [Cucumis sativus]
Cla97C11G208850	512	892	915	297	430	308	16.239	18.4585	21.3353	7.06375	7.93267	6.53108	2.74e-10	-1.48993	down	--	--	Cellular Component: intrinsic component of membrane (GO:0031224);;	K13348|2.33361e-149|cmo:103497800|protein Mpv17	Peroxisome (ko04146)	[R]	General function prediction only	Mpv17 / PMP22 family	sp|Q54XX9|PX24B_DICDI PXMP2/4 family protein 2 OS=Dictyostelium discoideum OX=44689 GN=DDB_G0278529 PE=3 SV=1	S	Function unknown	PREDICTED: protein Mpv17 [Cucumis melo]
Cla97C01G006110	55	213	397	19	72	15	0.974426	2.46657	5.18717	0.251431	0.744671	0.171122	0.00019858	-3.0257	down	--	--	Molecular Function: UDP-glycosyltransferase activity (GO:0008194);; Cellular Component: intrinsic component of membrane (GO:0031224);;	--	--	--	--	Core-2/I-Branching enzyme	sp|Q65XS5|BC10_ORYSJ Glycosyltransferase BC10 OS=Oryza sativa subsp. japonica OX=39947 GN=BC10 PE=1 SV=1	S	Function unknown	PREDICTED: uncharacterized protein LOC103504601 [Cucumis melo]
Cla97C09G169110	1109	2493	2801	932	1543	1074	17.0437	24.9648	31.6296	10.7637	13.7848	11.0344	0.000267015	-1.16559	down	[J]	Translation, ribosomal structure and biogenesis	Molecular Function: nucleic acid binding (GO:0003676);; Molecular Function: small molecule binding (GO:0036094);;	K13207|0|cmo:103492722|RNA-binding protein BRN1	--	[A]	RNA processing and modification	RNA recognition motif. (a.k.a. RRM, RBD, or RNP domain);; RNA recognition motif;; BRCA1-associated protein 2	sp|Q8LFS6|BRN1L_ARATH RNA-binding protein BRN1 OS=Arabidopsis thaliana OX=3702 GN=BRN1 PE=2 SV=1	A	RNA processing and modification	PREDICTED: RNA-binding protein BRN1 [Cucumis melo]
Cla97C10G203860	1356	1599	822	392	309	379	58.747	45.1672	26.1685	12.7418	7.78491	10.9835	7.46e-08	-2.13063	down	--	--	Cellular Component: intrinsic component of membrane (GO:0031224);;	--	--	--	--	--	--	175		PREDICTED: uncharacterized protein LOC101211971 [Cucumis sativus]
Cla97C11G208570	104	214	385	67	80	47	6.61714	8.89754	18.0439	3.19939	2.95691	1.98343	5.85e-05	-2.16544	down	--	--	Molecular Function: transition metal ion binding (GO:0046914);;	K22378|2.28139e-58|cmos:111450796|E3 ubiquitin-protein ligase RING1-like	--	[O]	Posttranslational modification, protein turnover, chaperones	Ring finger domain;; RING-like zinc finger;; Zinc finger, C3HC4 type (RING finger);; RING-H2 zinc finger domain;; RING-type zinc-finger;; Zinc finger, C3HC4 type (RING finger);; zinc-RING finger domain	sp|Q9VHI7|IRU_DROME E3 ubiquitin-protein ligase Iruka OS=Drosophila melanogaster OX=7227 GN=Iru PE=1 SV=1	O	Posttranslational modification, protein turnover, chaperones	E3 ubiquitin-protein ligase RING1-like [Cucurbita moschata]
Cla97C11G215220	648	1304	1285	348	446	355	7.41949	9.73533	10.8194	2.99478	2.96626	2.72041	1.33e-12	-1.79699	down	--	--	Cellular Component: intrinsic component of membrane (GO:0031224);;	--	--	[S]	Function unknown	Sad1 / UNC-like C-terminal;; Muskelin N-terminus	sp|F4I316|SUN3_ARATH SUN domain-containing protein 3 OS=Arabidopsis thaliana OX=3702 GN=SUN3 PE=1 SV=1	S	Function unknown	PREDICTED: uncharacterized protein LOC103485395 [Cucumis melo]
Cla97C01G021390	762	2071	2767	514	1258	697	8.2484	14.627	22.029	4.17929	7.92598	5.04795	0.00099517	-1.51607	down	--	--	--	--	--	--	--	WRKY DNA -binding domain	sp|Q93WT0|WRK31_ARATH Probable WRKY transcription factor 31 OS=Arabidopsis thaliana OX=3702 GN=WRKY31 PE=2 SV=1	K	Transcription	WRKY transcription factor 2-like protein [Luffa aegyptiaca]
Cla97C02G031130	26911	93157	65369	25859	32248	31725	1052.08	2373.46	1877.73	759.641	732.948	829.246	0.00019979	-1.28996	down	[O]	Posttranslational modification, protein turnover, chaperones	Molecular Function: cis-trans isomerase activity (GO:0016859);; Biological Process: peptidyl-proline modification (GO:0018208);;	K01802|1.67553e-109|cmo:103490307|peptidyl-prolyl cis-trans isomerase	--	[O]	Posttranslational modification, protein turnover, chaperones	Cyclophilin type peptidyl-prolyl cis-trans isomerase/CLD	sp|Q39613|CYPH_CATRO Peptidyl-prolyl cis-trans isomerase OS=Catharanthus roseus OX=4058 GN=PCKR1 PE=1 SV=1	O	Posttranslational modification, protein turnover, chaperones	PREDICTED: peptidyl-prolyl cis-trans isomerase [Cucumis melo]
Cla97C09G168530	5413	9522	10162	3657	5486	4716	181.24	207.77	249.985	91.9823	106.787	105.552	2.51e-07	-1.18016	down	--	--	Cellular Component: cytoplasm (GO:0005737);; Cellular Component: cell-cell junction (GO:0005911);; Cellular Component: membrane (GO:0016020);;	--	--	[O]	Posttranslational modification, protein turnover, chaperones	CS domain	sp|Q6YYB0|Y8359_ORYSJ Uncharacterized protein Os08g0359500 OS=Oryza sativa subsp. japonica OX=39947 GN=Os08g0359500 PE=2 SV=1	O	Posttranslational modification, protein turnover, chaperones	PREDICTED: uncharacterized protein OsI_027940 [Cucumis melo]
Cla97C06G113170	1529	1017	1163	471	1110	473	50.6604	21.958	28.3094	11.7285	21.3908	10.4661	0.00307955	-1.33027	down	--	--	Cellular Component: intrinsic component of membrane (GO:0031224);;	--	--	--	--	Endoplasmic reticulum-based factor for assembly of V-ATPase	--	S	Function unknown	uncharacterized protein LOC111460360 [Cucurbita moschata]
Cla97C08G155900	274	669	1984	46	102	24	27.5593	43.9524	147.129	3.44327	5.96025	1.56223	2.52e-09	-4.45704	down	--	--	--	--	--	--	--	--	--	137		PREDICTED: uncharacterized protein LOC103488227 [Cucumis melo]
Cla97C04G075930	2169	10149	16237	1717	3024	1429	27.3063	83.2964	150.258	16.2444	22.1413	12.0251	3.42e-05	-2.50561	down	[T]	Signal transduction mechanisms	Biological Process: cellular protein modification process (GO:0006464);; Biological Process: phosphate-containing compound metabolic process (GO:0006796);; Molecular Function: kinase activity (GO:0016301);; Molecular Function: purine ribonucleoside binding (GO:0032550);;	--	--	[T]	Signal transduction mechanisms	Protein tyrosine and serine/threonine kinase;; Protein kinase domain	sp|Q9SF86|PCRK1_ARATH Serine/threonine-protein kinase PCRK1 OS=Arabidopsis thaliana OX=3702 GN=PCRK1 PE=1 SV=1	T	Signal transduction mechanisms	probable serine/threonine-protein kinase PBL19 [Cucurbita pepo subsp. pepo]
Cla97C05G085960	79	340	823	34	34	137	1.48497	4.18846	11.4432	0.473856	0.367275	1.72633	0.00143797	-2.83899	down	--	--	Molecular Function: nucleic acid binding transcription factor activity (GO:0001071);; Molecular Function: DNA binding (GO:0003677);; Biological Process: transcription, DNA-templated (GO:0006351);; Cellular Component: intracellular membrane-bounded organelle (GO:0043231);;	K09419|0|csv:101218269|heat stress transcription factor A-6b	--	[K]	Transcription	HSF-type DNA-binding	sp|Q9LUH8|HFA6B_ARATH Heat stress transcription factor A-6b OS=Arabidopsis thaliana OX=3702 GN=HSFA6b PE=2 SV=1	K	Transcription	PREDICTED: heat stress transcription factor A-6b [Cucumis sativus]
Cla97C03G058110	2208	3121	3780	261	672	442	68.5024	63.0889	86.1517	6.08121	12.1048	9.14856	1.43e-20	-3.11063	down	--	--	--	--	--	[T]	Signal transduction mechanisms	CS domain;; Siah interacting protein, N terminal	sp|Q3T168|CYBP_BOVIN Calcyclin-binding protein OS=Bos taurus OX=9913 GN=CACYBP PE=2 SV=1	T	Signal transduction mechanisms	PREDICTED: calcyclin-binding protein [Cucumis sativus]
Cla97C05G083710	797	1464	2142	341	846	530	43.7962	52.444	86.5288	14.0815	27.0432	19.4779	2.74e-05	-1.71891	down	--	--	--	--	--	--	--	Rapid ALkalinization Factor (RALF)	sp|Q2HIM9|RLF31_ARATH Protein RALF-like 31 OS=Arabidopsis thaliana OX=3702 GN=RALFL31 PE=3 SV=1	S	Function unknown	PREDICTED: protein RALF-like 24 isoform X1 [Cucumis melo]
Cla97C10G192140	8128	10080	6162	4304	5314	5242	325.25	262.879	181.173	129.426	123.624	140.244	9.83e-05	-1.06155	down	[J]	Translation, ribosomal structure and biogenesis	Molecular Function: structural molecule activity (GO:0005198);; Biological Process: gene expression (GO:0010467);; Cellular Component: intracellular ribonucleoprotein complex (GO:0030529);;	K02904|1.50863e-98|cmax:111483200|50S ribosomal protein L29, chloroplastic-like	Ribosome (ko03010)	[J]	Translation, ribosomal structure and biogenesis	Ribosomal L29 protein	sp|Q9FJP3|RK29_ARATH 50S ribosomal protein L29, chloroplastic OS=Arabidopsis thaliana OX=3702 GN=RPL29 PE=1 SV=1	J	Translation, ribosomal structure and biogenesis	50S ribosomal protein L29, chloroplastic-like [Cucurbita maxima]
Cla97C02G031860	1560	2884	5534	594	777	1349	108.747	131.022	283.478	31.0743	31.4908	62.8876	3.32e-05	-2.17449	down	--	--	Molecular Function: nucleic acid binding (GO:0003676);; Cellular Component: intracellular membrane-bounded organelle (GO:0043231);;	--	--	[O]	Posttranslational modification, protein turnover, chaperones	Myb-like DNA-binding domain	sp|Q1A173|RADL6_ARATH Protein RADIALIS-like 6 OS=Arabidopsis thaliana OX=3702 GN=RL6 PE=2 SV=1	K	Transcription	protein RADIALIS-like 3 [Cucurbita pepo subsp. pepo]
Cla97C11G220730	797	1719	2452	780	1282	895	26.0162	36.6022	58.8549	19.1408	24.3504	19.5424	0.00548719	-1.06877	down	--	--	Cellular Component: intrinsic component of membrane (GO:0031224);; Molecular Function: transition metal ion binding (GO:0046914);;	--	--	--	--	--	sp|Q6GPH4|XAF1_HUMAN XIAP-associated factor 1 OS=Homo sapiens OX=9606 GN=XAF1 PE=1 SV=1	S	Function unknown	XIAP-associated factor 1-like [Cucurbita moschata]
Cla97C03G057860	708	2102	3525	67	340	138	17.3341	33.5566	63.4661	1.22523	4.84361	2.26035	1.09e-09	-3.9213	down	[G]	Carbohydrate transport and metabolism	Molecular Function: hydrolase activity, hydrolyzing O-glycosyl compounds (GO:0004553);; Biological Process: aminoglycan catabolic process (GO:0006026);; Biological Process: cell wall macromolecule metabolic process (GO:0044036);; Biological Process: primary metabolic process (GO:0044238);; Molecular Function: carbohydrate derivative binding (GO:0097367);;	K01183|2.93287e-153|cpep:111783367|endochitinase EP3	Amino sugar and nucleotide sugar metabolism (ko00520)	[R]	General function prediction only	Chitinase class I;; Chitin recognition protein	sp|Q9M2U5|CHI5_ARATH Endochitinase EP3 OS=Arabidopsis thaliana OX=3702 GN=EP3 PE=1 SV=1	S	Function unknown	endochitinase EP3 [Cucurbita pepo subsp. pepo]
Cla97C09G162570	587	431	244	40	70	197	8.357	3.99338	2.55114	0.419337	0.578188	1.87132	0.000659977	-2.44732	down	[QV]	Secondary metabolites biosynthesis, transport and catabolism;; Defense mechanisms	Molecular Function: oxidoreductase activity (GO:0016491);; Cellular Component: intrinsic component of membrane (GO:0031224);; Biological Process: single-organism metabolic process (GO:0044710);; Molecular Function: tetrapyrrole binding (GO:0046906);; Molecular Function: transition metal ion binding (GO:0046914);;	K12638|0|cmo:103500734|3-epi-6-deoxocathasterone 23-monooxygenase	Brassinosteroid biosynthesis (ko00905)	[QI]	Secondary metabolites biosynthesis, transport and catabolism;; Lipid transport and metabolism	Cytochrome P450	sp|Q94IA6|C90D1_ARATH 3-epi-6-deoxocathasterone 23-monooxygenase CYP90D1 OS=Arabidopsis thaliana OX=3702 GN=CYP90D1 PE=1 SV=1	Q	Secondary metabolites biosynthesis, transport and catabolism	PREDICTED: 3-epi-6-deoxocathasterone 23-monooxygenase [Cucumis melo]
Cla97C05G102990	223	703	1918	110	258	230	2.56205	5.27831	16.2316	0.947378	1.72772	1.76635	0.000240476	-2.57476	down	--	--	Biological Process: transport (GO:0006810);; Cellular Component: intrinsic component of membrane (GO:0031224);;	--	--	--	--	Nodulin-like	sp|F4I9E1|NFD4_ARATH Protein NUCLEAR FUSION DEFECTIVE 4 OS=Arabidopsis thaliana OX=3702 GN=NFD4 PE=3 SV=1	S	Function unknown	protein NUCLEAR FUSION DEFECTIVE 4-like [Cucurbita moschata]
Cla97C08G156200	2702	4386	3904	1559	1991	2398	103.242	109.202	109.603	44.7541	44.2107	61.2423	5.42e-07	-1.1997	down	[C]	Energy production and conversion	Molecular Function: cation binding (GO:0043169);; Molecular Function: metal cluster binding (GO:0051540);;	--	--	--	--	2Fe-2S iron-sulfur cluster binding domain	sp|Q9LU21|PNSB3_ARATH Photosynthetic NDH subunit of subcomplex B 3, chloroplastic OS=Arabidopsis thaliana OX=3702 GN=PNSB3 PE=2 SV=1	C	Energy production and conversion	PREDICTED: photosynthetic NDH subunit of subcomplex B 3, chloroplastic isoform X2 [Cucumis sativus]
Cla97C02G034360	40	287	182	9	37	14	0.499909	2.39198	1.71017	0.080146	0.273455	0.115286	8.21e-06	-3.37209	down	[R]	General function prediction only	Biological Process: response to stress (GO:0006950);; Molecular Function: purine ribonucleoside binding (GO:0032550);;	--	--	[T]	Signal transduction mechanisms	NB-ARC domain;; Rx N-terminal domain	sp|Q7XA40|RGA3_SOLBU Putative disease resistance protein RGA3 OS=Solanum bulbocastanum OX=147425 GN=RGA3 PE=2 SV=2	T	Signal transduction mechanisms	PREDICTED: disease resistance protein RGA2-like [Cucumis melo]
Cla97C01G009310	2141	7268	8619	1896	3246	2449	24.6641	54.5739	72.9658	16.4118	21.7407	18.8637	0.000479765	-1.53487	down	--	--	--	K14508|0|cmo:103498301|NPR1; regulatory protein NPR3-like	Plant hormone signal transduction (ko04075)	[R]	General function prediction only	NPR1/NIM1 like defence protein C terminal;; BTB/POZ domain;; Ankyrin repeat;; Ankyrin repeats (3 copies);; Ankyrin repeats (many copies)	sp|E7BQV0|NPR1_MALHU BTB/POZ domain and ankyrin repeat-containing protein NPR1 OS=Malus hupehensis OX=106556 GN=NPR1 PE=2 SV=2	S	Function unknown	regulatory protein NPR3-like [Cucumis melo]
Cla97C03G065270	372	846	1163	23	160	45	5.61908	8.33697	12.919	0.256266	1.40638	0.448154	9.97e-09	-3.80372	down	[T]	Signal transduction mechanisms	Biological Process: cellular protein modification process (GO:0006464);; Molecular Function: kinase activity (GO:0016301);; Molecular Function: purine ribonucleoside binding (GO:0032550);;	--	--	[T]	Signal transduction mechanisms	Protein tyrosine and serine/threonine kinase;; Protein kinase domain	sp|Q9ZUF4|RIPK_ARATH Serine/threonine-protein kinase RIPK OS=Arabidopsis thaliana OX=3702 GN=RIPK PE=1 SV=1	T	Signal transduction mechanisms	serine/threonine-protein kinase RIPK-like [Cucurbita moschata]
Cla97C02G044900	3071	8339	9565	1903	3325	2346	80.7982	143.016	184.942	37.6128	50.8692	41.2718	2.12e-06	-1.77308	down	--	--	--	K13434|2.22878e-114|cmo:103496254|ethylene-responsive transcription factor ERF069-like	Plant-pathogen interaction (ko04626)	--	--	AP2 domain	sp|O04682|PTI6_SOLLC Pathogenesis-related genes transcriptional activator PTI6 OS=Solanum lycopersicum OX=4081 GN=PTI6 PE=2 SV=1	K	Transcription	PREDICTED: ethylene-responsive transcription factor ERF069-like [Cucumis melo]
Cla97C02G035440	1487	2163	1129	756	545	1139	13.4204	12.7281	7.48812	5.12955	2.86014	6.87347	0.00370452	-1.25755	down	[N]	Cell motility	Biological Process: cellular process (GO:0009987);; Cellular Component: membrane (GO:0016020);; Molecular Function: transferase activity, transferring glycosyl groups (GO:0016757);;	--	--	--	--	Cellulose synthase	sp|Q339N5|CSLH1_ORYSJ Cellulose synthase-like protein H1 OS=Oryza sativa subsp. japonica OX=39947 GN=CSLH1 PE=2 SV=2	G	Carbohydrate transport and metabolism	cellulose synthase-like protein H1 [Cucurbita moschata]
Cla97C02G045550	5191	10261	11309	4103	6799	3582	171.247	220.614	274.122	101.712	130.405	79.0014	7.78e-05	-1.21689	down	[O]	Posttranslational modification, protein turnover, chaperones	Molecular Function: cis-trans isomerase activity (GO:0016859);; Biological Process: peptidyl-proline modification (GO:0018208);;	K01802|2.15206e-120|cmo:103502021|peptidyl-prolyl cis-trans isomerase CYP20-1	--	[O]	Posttranslational modification, protein turnover, chaperones	Cyclophilin type peptidyl-prolyl cis-trans isomerase/CLD	sp|Q9SP02|CP20A_ARATH Peptidyl-prolyl cis-trans isomerase CYP20-1 OS=Arabidopsis thaliana OX=3702 GN=CYP20-1 PE=1 SV=1	O	Posttranslational modification, protein turnover, chaperones	PREDICTED: peptidyl-prolyl cis-trans isomerase CYP20-1 [Cucumis melo]
Cla97C03G058730	472	939	670	300	567	263	14.551	18.8962	15.19	6.94084	10.1798	5.42104	7.39e-05	-1.21916	down	[R]	General function prediction only	Molecular Function: purine ribonucleoside binding (GO:0032550);; Biological Process: intracellular signal transduction (GO:0035556);; Cellular Component: cell part (GO:0044464);;	K07904|6.62053e-147|csv:101203665|ras-related protein RABA1c	Endocytosis (ko04144)	[U]	Intracellular trafficking, secretion, and vesicular transport	Ras family;; Ras of Complex, Roc, domain of DAPkinase;; ADP-ribosylation factor family;; 50S ribosome-binding GTPase	sp|Q9FK68|RAA1C_ARATH Ras-related protein RABA1c OS=Arabidopsis thaliana OX=3702 GN=RABA1C PE=1 SV=1	U	Intracellular trafficking, secretion, and vesicular transport	PREDICTED: ras-related protein RABA1c [Cucumis sativus]
Cla97C10G187570	9762	14862	24273	1501	3343	3851	114.031	113.134	208.331	13.1707	22.6999	30.0745	1.46e-10	-2.84053	down	[R]	General function prediction only	--	K09553|0|cmo:103490922|hsp70-Hsp90 organizing protein 3-like	--	[O]	Posttranslational modification, protein turnover, chaperones	Tetratricopeptide repeat;; Tetratricopeptide repeat;; TPR repeat;; STI1 domain;; Tetratricopeptide repeat;; Tetratricopeptide repeat;; Tetratricopeptide repeat;; Tetratricopeptide repeat;; Tetratricopeptide repeat;; Tetratricopeptide repeat;; Tetratricopeptide repeat;; Tetratricopeptide repeat;; Tetratricopeptide repeat;; Tetratricopeptide repeat;; Bacterial transcriptional activator domain	sp|Q43468|HSOP1_SOYBN Hsp70-Hsp90 organizing protein 1 OS=Glycine max OX=3847 GN=HOP1 PE=1 SV=2	O	Posttranslational modification, protein turnover, chaperones	PREDICTED: hsp70-Hsp90 organizing protein 3-like [Cucumis melo]
Cla97C08G161560	581	1591	2318	482	843	501	5.99836	10.7051	17.5807	3.73687	5.05697	3.45486	0.000453124	-1.61079	down	[T]	Signal transduction mechanisms	--	--	--	--	--	Protein kinase domain;; Protein tyrosine and serine/threonine kinase;; Salt stress response/antifungal	sp|Q9CAL3|CRK2_ARATH Cysteine-rich receptor-like protein kinase 2 OS=Arabidopsis thaliana OX=3702 GN=CRK2 PE=1 SV=1	T	Signal transduction mechanisms	PREDICTED: uncharacterized protein LOC103487712 [Cucumis melo]
Cla97C02G040170	775	1714	1927	363	620	344	65.5144	94.3943	119.647	23.0364	30.4451	19.4088	2.15e-09	-2.0574	down	--	--	Cellular Component: intrinsic component of membrane (GO:0031224);;	--	--	[R]	General function prediction only	Proteolipid membrane potential modulator	sp|Q9SUI0|RC24_ARATH UPF0057 membrane protein At4g30660 OS=Arabidopsis thaliana OX=3702 GN=At4g30660 PE=3 SV=1	S	Function unknown	UPF0057 membrane protein At4g30660-like [Cucurbita moschata]
Cla97C04G076660	122	405	684	116	146	102	0.562898	1.22517	2.33514	0.402657	0.394545	0.316323	0.000464408	-2.01452	down	[T]	Signal transduction mechanisms	Molecular Function: nucleoside-triphosphatase activity (GO:0017111);; Cellular Component: intrinsic component of membrane (GO:0031224);; Molecular Function: purine ribonucleoside binding (GO:0032550);; Biological Process: establishment of localization (GO:0051234);;	--	--	[Q]	Secondary metabolites biosynthesis, transport and catabolism	ABC-2 type transporter;; ABC transporter;; Plant PDR ABC transporter associated;; ABC-2 type transporter;; ABC-transporter N-terminal;; AAA domain, putative AbiEii toxin, Type IV TA system;; ATPase family associated with various cellular activities (AAA)	sp|Q7PC84|AB39G_ARATH ABC transporter G family member 39 OS=Arabidopsis thaliana OX=3702 GN=ABCG39 PE=3 SV=1	Q	Secondary metabolites biosynthesis, transport and catabolism	PREDICTED: ABC transporter G family member 39-like [Cucumis melo]
Cla97C09G163050	92	126	132	14	57	17	1.43574	1.28583	1.52097	0.16184	0.512261	0.176113	4.37e-05	-2.41931	down	[T]	Signal transduction mechanisms	Molecular Function: protein kinase activity (GO:0004672);; Biological Process: protein phosphorylation (GO:0006468);; Molecular Function: purine ribonucleoside binding (GO:0032550);;	--	--	[T]	Signal transduction mechanisms	Protein tyrosine and serine/threonine kinase;; Protein kinase domain	sp|Q9ZUF4|RIPK_ARATH Serine/threonine-protein kinase RIPK OS=Arabidopsis thaliana OX=3702 GN=RIPK PE=1 SV=1	T	Signal transduction mechanisms	PREDICTED: putative receptor-like protein kinase At1g72540 [Cucumis melo]
Cla97C10G192430	4806	10274	13161	1371	2764	2216	92.8715	129.375	186.856	19.9053	31.0429	28.6216	1.22e-11	-2.48052	down	[H]	Coenzyme transport and metabolism	Molecular Function: oxidoreductase activity, acting on diphenols and related substances as donors, oxygen as acceptor (GO:0016682);; Cellular Component: intrinsic component of membrane (GO:0031224);; Molecular Function: cation binding (GO:0043169);; Cellular Component: intracellular membrane-bounded organelle (GO:0043231);; Biological Process: single-organism metabolic process (GO:0044710);;	K17893|0|cmo:103503097|ubiquinol oxidase, mitochondrial-like	--	--	--	Alternative oxidase	sp|Q40294|AOX1_MANIN Ubiquinol oxidase, mitochondrial OS=Mangifera indica OX=29780 GN=AOMI 1 PE=1 SV=2	C	Energy production and conversion	mitochondrial AOX2 (mitochondrion) [Citrullus lanatus]
Cla97C04G069770	304	552	1546	280	336	194	6.40783	7.59408	24.0039	4.44124	4.11986	2.72969	0.0016764	-1.88728	down	--	--	Molecular Function: endopeptidase activity (GO:0004175);; Biological Process: protein metabolic process (GO:0019538);; Cellular Component: intrinsic component of membrane (GO:0031224);; Molecular Function: transition metal ion binding (GO:0046914);;	K09651|1.40611e-173|cmo:103486069|rhomboid-like protein 14, mitochondrial	--	[S]	Function unknown	Rhomboid family	sp|Q8RXW0|RBL14_ARATH Rhomboid-like protein 14, mitochondrial OS=Arabidopsis thaliana OX=3702 GN=RBL14 PE=2 SV=1	S	Function unknown	PREDICTED: rhomboid-like protein 14, mitochondrial [Cucumis melo]
Cla97C06G126270	3492	5288	3249	2122	2292	2970	56.6347	55.8893	38.7162	25.8541	21.6035	32.1999	0.000299841	-1.01428	down	[JM]	Translation, ribosomal structure and biogenesis;; Cell wall/membrane/envelope biogenesis	Biological Process: metabolic process (GO:0008152);; Molecular Function: transferase activity, transferring phosphorus-containing groups (GO:0016772);; Cellular Component: microbody (GO:0042579);;	K00966|0|cmo:103493943|mannose-1-phosphate guanyltransferase alpha-like	Fructose and mannose metabolism (ko00051);; Amino sugar and nucleotide sugar metabolism (ko00520);; Biosynthesis of cofactors (ko01240)	[GMO]	Carbohydrate transport and metabolism;; Cell wall/membrane/envelope biogenesis;; Posttranslational modification, protein turnover, chaperones	Nucleotidyl transferase;; Bacterial transferase hexapeptide (six repeats)	sp|Q86HG0|GMPPA_DICDI Mannose-1-phosphate guanyltransferase alpha OS=Dictyostelium discoideum OX=44689 GN=gmppA PE=2 SV=1	GMO	Carbohydrate transport and metabolism;; Cell wall/membrane/envelope biogenesis;; Posttranslational modification, protein turnover, chaperones	PREDICTED: mannose-1-phosphate guanyltransferase alpha-like isoform X1 [Cucumis melo]
Cla97C09G181310	873	11326	11985	91	395	216	38.0528	322.053	384.242	2.97561	10.0082	6.29249	5.98e-12	-5.39763	down	--	--	Cellular Component: membrane (GO:0016020);;	--	--	--	--	Domain of unknown function (DUF588)	sp|B9SXY8|CSPLE_RICCO CASP-like protein 4D1 OS=Ricinus communis OX=3988 GN=RCOM_1206790 PE=3 SV=1	S	Function unknown	PREDICTED: CASP-like protein 4D1 [Cucumis melo]
Cla97C08G160730	1771	1880	7671	1819	1418	1182	28.5153	19.7225	90.7607	22.0103	13.2737	12.724	0.0080707	-1.66863	down	--	--	Biological Process: zinc II ion transport (GO:0006829);; Cellular Component: intrinsic component of membrane (GO:0031224);; Molecular Function: transition metal ion transmembrane transporter activity (GO:0046915);;	K14709|0|csv:101218224|zinc transporter 4, chloroplastic isoform X1	--	[P]	Inorganic ion transport and metabolism	ZIP Zinc transporter	sp|Q8LE59|IRT3_ARATH Fe(2+) transport protein 3, chloroplastic OS=Arabidopsis thaliana OX=3702 GN=IRT3 PE=2 SV=3	P	Inorganic ion transport and metabolism	PREDICTED: zinc transporter 4, chloroplastic isoform X2 [Cucumis sativus]
Cla97C03G058360	1107	2379	3159	713	830	629	42.0336	58.8867	88.1725	20.3567	18.3327	15.9612	1.55e-07	-1.90767	down	--	--	Biological Process: protein localization (GO:0008104);; Biological Process: establishment of localization (GO:0051234);;	K20472|2.75483e-103|cmo:103487438|coatomer subunit zeta-1-like	--	[U]	Intracellular trafficking, secretion, and vesicular transport	Clathrin adaptor complex small chain	sp|Q940S5|COPZ1_ARATH Coatomer subunit zeta-1 OS=Arabidopsis thaliana OX=3702 GN=At1g60970 PE=2 SV=1	U	Intracellular trafficking, secretion, and vesicular transport	coatomer subunit zeta-1-like isoform X2 [Cucurbita moschata]
Cla97C02G029820	180	174	184	85	153	67	10.2851	6.48934	7.74817	3.63013	5.09253	2.55532	0.00283492	-1.22937	down	--	--	--	--	--	--	--	--	--	149		uncharacterized protein LOC114724715 [Prosopis alba]
Cla97C03G056360	725	693	842	192	443	158	17.0666	10.6345	14.5793	3.39634	6.06692	2.4818	3.67e-06	-1.94617	down	[H]	Coenzyme transport and metabolism	--	--	--	--	--	(2R)-phospho-3-sulfolactate synthase (ComA)	sp|Q8GWL1|HSA32_ARATH Protein HEAT-STRESS-ASSOCIATED 32 OS=Arabidopsis thaliana OX=3702 GN=HSA32 PE=2 SV=1	K	Transcription	PREDICTED: uncharacterized protein LOC101208408 [Cucumis sativus]
Cla97C09G167710	2402	8981	11425	469	1063	655	46.7993	114.078	163.607	6.86101	12.0344	8.52894	2.1e-13	-3.68901	down	[O]	Posttranslational modification, protein turnover, chaperones	Molecular Function: protein binding (GO:0005515);; Biological Process: cellular process (GO:0009987);;	K09517|0|cmos:111455993|dnaJ protein ERDJ3B-like	Protein processing in endoplasmic reticulum (ko04141)	[O]	Posttranslational modification, protein turnover, chaperones	DnaJ C terminal domain;; DnaJ domain	sp|Q9LZK5|DNJ19_ARATH DnaJ protein ERDJ3B OS=Arabidopsis thaliana OX=3702 GN=ERDJ3B PE=1 SV=1	O	Posttranslational modification, protein turnover, chaperones	dnaJ protein ERDJ3B-like [Cucurbita moschata]
Cla97C03G061410	296	478	603	269	247	180	17.5285	18.4483	26.2542	11.984	8.48904	7.11912	0.000412139	-1.2861	down	--	--	--	--	--	--	--	--	--	194		PREDICTED: uncharacterized protein LOC103487235 isoform X1 [Cucumis melo]
Cla97C02G027900	968	1654	1325	494	967	724	18.1209	20.19	18.2271	6.94735	10.5223	9.06756	1.22e-07	-1.19723	down	--	--	Cellular Component: membrane (GO:0016020);;	--	--	--	--	Fasciclin domain	sp|Q9FL53|FLA21_ARATH Fasciclin-like arabinogalactan protein 21 OS=Arabidopsis thaliana OX=3702 GN=FLA21 PE=2 SV=1	S	Function unknown	PREDICTED: fasciclin-like arabinogalactan protein 21 [Cucumis sativus]
Cla97C03G068000	450	1009	28197	233	90	225	11.5253	16.8301	530.771	4.4727	1.33193	3.84302	0.00010346	-6.00137	down	--	--	--	--	--	--	--	Phloem protein 2;; F-box domain	sp|Q9ZVQ6|P2B10_ARATH F-box protein PP2-B10 OS=Arabidopsis thaliana OX=3702 GN=PP2B10 PE=1 SV=1	S	Function unknown	PREDICTED: putative F-box protein PP2-B12 [Cucumis sativus]
Cla97C06G116660	204	155	349	5	32	9	4.80682	2.37528	6.03505	0.081139	0.427363	0.136553	5.52e-10	-4.43459	down	--	--	--	K09422|1.19137e-139|cmo:103499420|myb-related protein Myb4-like	--	[K]	Transcription	Myb-like DNA-binding domain;; Myb-like DNA-binding domain	sp|Q9SJX8|MYB14_ARATH Transcription factor MYB14 OS=Arabidopsis thaliana OX=3702 GN=MYB14 PE=2 SV=1	K	Transcription	PREDICTED: myb-related protein Myb4-like [Cucumis melo]
Cla97C01G022020	463	4016	6662	157	644	112	12.7025	71.9555	134.573	3.22679	10.2809	2.05341	3.13e-06	-3.97027	down	[T]	Signal transduction mechanisms	--	--	--	--	--	Protein kinase domain;; Protein tyrosine and serine/threonine kinase	sp|Q8S9L6|CRK29_ARATH Cysteine-rich receptor-like protein kinase 29 OS=Arabidopsis thaliana OX=3702 GN=CRK29 PE=2 SV=1	T	Signal transduction mechanisms	cysteine-rich receptor-like protein kinase 29 isoform X2 [Cucurbita moschata]
Cla97C03G051560	502	974	1026	353	664	361	6.99887	8.84723	10.5117	3.68965	5.38021	3.35971	0.000117457	-1.20067	down	--	--	--	--	--	[R]	General function prediction only	Glycosyl transferase family 90	sp|B0X1Q4|RUMI_CULQU O-glucosyltransferase rumi homolog OS=Culex quinquefasciatus OX=7176 GN=CPIJ013394 PE=3 SV=1	S	Function unknown	PREDICTED: O-glucosyltransferase rumi homolog [Cucumis melo]
Cla97C08G148560	12604	27613	23979	5761	10087	7982	165.526	236.327	231.379	56.8479	77.0086	70.0858	2.3e-12	-1.74258	down	[O]	Posttranslational modification, protein turnover, chaperones	Cellular Component: endoplasmic reticulum (GO:0005783);; Molecular Function: intramolecular oxidoreductase activity, transposing S-S bonds (GO:0016864);; Biological Process: cellular homeostasis (GO:0019725);; Cellular Component: intrinsic component of membrane (GO:0031224);;	K09580|0|cmo:103504071|protein disulfide-isomerase-like	Protein processing in endoplasmic reticulum (ko04141)	[O]	Posttranslational modification, protein turnover, chaperones	Thioredoxin;; Thioredoxin-like domain;; Thioredoxin-like domain;; OST3 / OST6 family, transporter family;; Thioredoxin-like;; Thioredoxin-like;; AhpC/TSA family;; ERp29, N-terminal domain;; Glutaredoxin	sp|Q9XF61|PDI_DATGL Protein disulfide-isomerase OS=Datisca glomerata OX=34297 GN=PDI PE=2 SV=1	O	Posttranslational modification, protein turnover, chaperones	PREDICTED: protein disulfide-isomerase-like [Cucumis melo]
Cla97C05G081140	2959	12902	12725	1077	4428	864	59.032	167.751	186.527	16.1395	51.354	11.5213	0.000113334	-2.52652	down	--	--	Molecular Function: nucleic acid binding transcription factor activity (GO:0001071);; Molecular Function: DNA binding (GO:0003677);; Biological Process: transcription, DNA-templated (GO:0006351);;	--	--	--	--	WRKY DNA -binding domain	sp|Q8H0Y8|WRK41_ARATH Probable WRKY transcription factor 41 OS=Arabidopsis thaliana OX=3702 GN=WRKY41 PE=2 SV=2	K	Transcription	putative WRKY transcription factor 46 [Cucumis melo var. makuwa]
Cla97C11G207560	1971	2774	4099	2019	1425	1683	57.9505	53.1513	88.5592	44.611	24.3514	33.0776	0.00481859	-1.07681	down	--	--	--	--	--	--	--	Domain of unknown function (DUF3067)	--	S	Function unknown	uncharacterized protein LOC111433376 [Cucurbita moschata]
Cla97C08G160690	1817	3067	3986	1357	2348	1517	20.9978	23.1061	33.8556	11.7838	15.7752	11.7247	0.000261186	-1.10851	down	[P]	Inorganic ion transport and metabolism	Molecular Function: hydrogen ion transmembrane transporter activity (GO:0015078);; Biological Process: proton transport (GO:0015992);; Cellular Component: intrinsic component of membrane (GO:0031224);;	--	--	[P]	Inorganic ion transport and metabolism	Sodium/hydrogen exchanger family	sp|B5X0N6|KEA6_ARATH K(+) efflux antiporter 6 OS=Arabidopsis thaliana OX=3702 GN=KEA6 PE=2 SV=1	P	Inorganic ion transport and metabolism	PREDICTED: K(+) efflux antiporter 6 [Cucumis sativus]
Cla97C02G046380	167	408	1298	78	150	19	7.17218	11.4377	41.0631	2.5171	3.74386	0.534753	0.000119656	-3.28923	down	--	--	Molecular Function: cation binding (GO:0043169);;	--	--	[R]	General function prediction only	C2H2-type zinc finger;; C2H2-type zinc finger	sp|Q42410|ZAT12_ARATH Zinc finger protein ZAT12 OS=Arabidopsis thaliana OX=3702 GN=ZAT12 PE=2 SV=1	S	Function unknown	zinc finger protein ZAT12-like [Cucurbita pepo subsp. pepo]
Cla97C03G065510	2672	7809	14663	1923	3268	2603	80.6551	153.657	325.283	43.6067	57.3511	52.5414	0.000165063	-1.99538	down	--	--	Biological Process: transport (GO:0006810);; Cellular Component: cell part (GO:0044464);;	K12191|3.76888e-121|cmo:103492353|vacuolar protein sorting-associated protein 2 homolog 1	Endocytosis (ko04144)	[U]	Intracellular trafficking, secretion, and vesicular transport	Snf7	sp|Q9SKI2|VPS2A_ARATH Vacuolar protein sorting-associated protein 2 homolog 1 OS=Arabidopsis thaliana OX=3702 GN=VPS2.1 PE=1 SV=2	U	Intracellular trafficking, secretion, and vesicular transport	PREDICTED: vacuolar protein sorting-associated protein 2 homolog 1 [Cucumis melo]
Cla97C10G193930	47	77	61	2	28	12	3.8071	4.08734	3.61554	0.122052	1.28099	0.640708	0.00210129	-2.56888	down	--	--	--	--	--	--	--	Late embryogenesis abundant protein	sp|P46521|LEA5A_GOSHI Late embryogenesis abundant protein Lea5-A OS=Gossypium hirsutum OX=3635 GN=LEA5-A PE=2 SV=1	S	Function unknown	PREDICTED: late embryogenesis abundant protein Lea5-A-like [Cucumis sativus]
Cla97C05G100130	91	127	184	15	33	9	1.23071	1.1161	1.82805	0.144689	0.252154	0.076847	3.47e-08	-3.20578	down	[MDT]	Cell wall/membrane/envelope biogenesis;; Cell cycle control, cell division, chromosome partitioning;; Signal transduction mechanisms	Molecular Function: purine ribonucleoside binding (GO:0032550);;	K08900|0|cmo:103503918|AAA-ATPase At3g50940-like	--	[O]	Posttranslational modification, protein turnover, chaperones	Domain associated at C-terminal with AAA;; ATPase family associated with various cellular activities (AAA)	sp|Q147F9|AATPC_ARATH AAA-ATPase At3g50940 OS=Arabidopsis thaliana OX=3702 GN=At3g50940 PE=2 SV=1	O	Posttranslational modification, protein turnover, chaperones	PREDICTED: AAA-ATPase At3g50940-like [Cucumis melo]
Cla97C01G005370	79	243	605	94	154	71	1.82703	3.66248	10.2903	1.63579	2.06046	1.08817	0.00795129	-1.85949	down	[O]	Posttranslational modification, protein turnover, chaperones	--	--	--	[C]	Energy production and conversion	SPFH domain / Band 7 family	sp|Q9FHM7|HIR4_ARATH Hypersensitive-induced response protein 4 OS=Arabidopsis thaliana OX=3702 GN=HIR4 PE=1 SV=1	C	Energy production and conversion	PREDICTED: hypersensitive-induced response protein 4 [Cucumis sativus]
Cla97C08G153600	3624	29135	26537	373	1904	729	72.9324	382.197	392.485	5.62905	22.2717	9.80082	6.25e-11	-4.6207	down	[I]	Lipid transport and metabolism	Molecular Function: catalytic activity (GO:0003824);;	--	--	[V]	Defense mechanisms	alpha/beta hydrolase fold;; Carboxylesterase family;; Steryl acetyl hydrolase	sp|Q9SX25|CXE6_ARATH Probable carboxylesterase 6 OS=Arabidopsis thaliana OX=3702 GN=CXE6 PE=2 SV=1	V	Defense mechanisms	putative carboxylesterase 15 [Cucumis melo var. makuwa]
Cla97C02G040540	202	433	535	166	303	168	3.74192	5.23536	7.29402	2.30976	3.26315	2.08071	0.00203029	-1.20838	down	--	--	--	--	--	--	--	Plant invertase/pectin methylesterase inhibitor	--	S	Function unknown	pectinesterase inhibitor [Cucumis melo var. makuwa]
Cla97C03G061920	1409	1813	2425	575	811	736	47.4108	39.7355	59.9331	14.5258	15.8593	16.5509	7.91e-11	-1.76011	down	--	--	Molecular Function: protein binding (GO:0005515);; Molecular Function: enzyme activator activity (GO:0008047);; Biological Process: regulation of ATPase activity (GO:0043462);;	--	--	[S]	Function unknown	Activator of Hsp90 ATPase, N-terminal	--	O	Posttranslational modification, protein turnover, chaperones	PREDICTED: uncharacterized protein LOC103487198 [Cucumis melo]
Cla97C06G117520	422	2657	3443	200	511	332	11.1409	45.7441	66.8208	3.96021	7.84286	5.8613	4.39e-06	-2.93432	down	[O]	Posttranslational modification, protein turnover, chaperones	--	--	--	[O]	Posttranslational modification, protein turnover, chaperones	Ubiquitin-conjugating enzyme	sp|P61080|UB2D1_MOUSE Ubiquitin-conjugating enzyme E2 D1 OS=Mus musculus OX=10090 GN=Ube2d1 PE=1 SV=1	O	Posttranslational modification, protein turnover, chaperones	PREDICTED: ubiquitin-conjugating enzyme E2 D1-like [Cucumis melo]
Cla97C05G093120	433	1894	2366	392	856	381	10.8317	30.9117	43.5425	7.36518	12.4581	6.37234	0.00103336	-1.83186	down	--	--	Molecular Function: ubiquitin-like protein transferase activity (GO:0019787);; Biological Process: modification-dependent protein catabolic process (GO:0019941);; Biological Process: protein modification by small protein conjugation (GO:0032446);; Cellular Component: intracellular membrane-bounded organelle (GO:0043231);; Biological Process: single-multicellular organism process (GO:0044707);; Mo…	K04506|2.22364e-164|csv:101206998|E3 ubiquitin-protein ligase SINA-like 10	Ubiquitin mediated proteolysis (ko04120)	[R]	General function prediction only	Seven in absentia protein family	sp|Q84K34|SIL10_ARATH E3 ubiquitin-protein ligase SINA-like 10 OS=Arabidopsis thaliana OX=3702 GN=At5g37930 PE=2 SV=1	O	Posttranslational modification, protein turnover, chaperones	PREDICTED: E3 ubiquitin-protein ligase SINA-like 10 [Cucumis sativus]
Cla97C11G217020	559	1987	3635	290	288	283	10.1886	23.5998	48.6836	3.96789	3.04766	3.4403	8.69e-08	-3.10102	down	[R]	General function prediction only	Biological Process: auxin-activated signaling pathway (GO:0009734);; Molecular Function: substrate-specific transmembrane transporter activity (GO:0022891);; Cellular Component: intrinsic component of membrane (GO:0031224);; Biological Process: gametophyte development (GO:0048229);; Biological Process: auxin influx (GO:0060919);;	K13947|0|csv:101209818|auxin efflux carrier component 5	--	--	--	Membrane transport protein	sp|Q9FFD0|PIN5_ARATH Auxin efflux carrier component 5 OS=Arabidopsis thaliana OX=3702 GN=PIN5 PE=2 SV=2	P	Inorganic ion transport and metabolism	PREDICTED: putative auxin efflux carrier component 8 [Cucumis sativus]
Cla97C06G127530	365	404	999	89	333	64	17.2489	12.4387	34.695	3.1566	9.13936	1.99411	0.000579153	-2.32114	down	[T]	Signal transduction mechanisms	Molecular Function: metal ion binding (GO:0046872);;	K13448|4.32254e-71|csv:101215508|putative calcium-binding protein CML19	Plant-pathogen interaction (ko04626)	[T]	Signal transduction mechanisms	EF hand;; EF-hand domain pair;; EF-hand domain;; EF hand;; EF-hand domain pair	sp|Q8RYK0|CML31_ORYSJ Probable calcium-binding protein CML31 OS=Oryza sativa subsp. japonica OX=39947 GN=CML31 PE=2 SV=1	T	Signal transduction mechanisms	PREDICTED: putative calcium-binding protein CML19 [Cucumis sativus]
Cla97C05G089920	3994	7111	17099	652	1563	827	66.8611	77.58	210.322	8.19118	15.2049	9.25467	2.74e-11	-3.58235	down	--	--	Molecular Function: nucleic acid binding transcription factor activity (GO:0001071);; Molecular Function: DNA binding (GO:0003677);; Biological Process: transcription, DNA-templated (GO:0006351);; Cellular Component: intracellular membrane-bounded organelle (GO:0043231);;	K09419|2.45371e-169|cpep:111810183|heat stress transcription factor B-2a-like	--	[K]	Transcription	HSF-type DNA-binding	sp|Q6Z9C8|HFB2B_ORYSJ Heat stress transcription factor B-2b OS=Oryza sativa subsp. japonica OX=39947 GN=HSFB2B PE=2 SV=1	K	Transcription	heat stress transcription factor B-2a-like [Cucurbita pepo subsp. pepo]
Cla97C05G098760	496	2760	6408	338	694	213	7.77072	28.2218	73.8833	3.98072	6.32731	2.23344	1.84e-05	-3.28147	down	[T]	Signal transduction mechanisms	--	--	--	--	--	Protein tyrosine and serine/threonine kinase;; Protein kinase domain	sp|P93604|LRK10_WHEAT Rust resistance kinase Lr10 OS=Triticum aestivum OX=4565 GN=LRK10 PE=2 SV=1	T	Signal transduction mechanisms	PREDICTED: rust resistance kinase Lr10-like [Cucumis melo]
Cla97C03G058600	650	1549	2825	469	852	649	9.48522	14.7402	30.313	5.14157	7.23536	6.33859	0.000670177	-1.67198	down	[T]	Signal transduction mechanisms	Biological Process: cellular protein modification process (GO:0006464);; Biological Process: phosphate-containing compound metabolic process (GO:0006796);; Molecular Function: kinase activity (GO:0016301);; Molecular Function: purine ribonucleoside binding (GO:0032550);;	--	--	[T]	Signal transduction mechanisms	Protein tyrosine and serine/threonine kinase;; Protein kinase domain;; Ankyrin repeats (3 copies);; Ankyrin repeat;; Ankyrin repeat;; Ankyrin repeats (many copies)	sp|F4IS56|ILK1_ARATH Integrin-linked protein kinase 1 OS=Arabidopsis thaliana OX=3702 GN=ILK1 PE=1 SV=1	T	Signal transduction mechanisms	PREDICTED: serine/threonine-protein kinase STY8-like [Cucumis melo]
Cla97C01G019440	360	582	419	148	280	228	19.9452	21.0006	17.0495	6.13449	9.0138	8.44466	4.68e-08	-1.39704	down	[O]	Posttranslational modification, protein turnover, chaperones	Molecular Function: disulfide oxidoreductase activity (GO:0015036);; Biological Process: ether metabolic process (GO:0018904);; Biological Process: cellular homeostasis (GO:0019725);;	K03671|1.05458e-78|cmos:111453323|thioredoxin H-type-like	--	[O]	Posttranslational modification, protein turnover, chaperones	Thioredoxin	sp|Q43636|TRXH_RICCO Thioredoxin H-type OS=Ricinus communis OX=3988 PE=3 SV=1	O	Posttranslational modification, protein turnover, chaperones	thioredoxin H-type-like [Cucurbita moschata]
Cla97C03G059090	441	1174	1345	402	656	295	11.649	20.2091	26.0936	7.96318	10.0614	5.19736	0.000752477	-1.44008	down	--	--	Molecular Function: nucleic acid binding (GO:0003676);; Molecular Function: protein binding (GO:0005515);;	--	--	--	--	Helix-loop-helix DNA-binding domain	sp|Q9LET0|BH107_ARATH Putative transcription factor bHLH107 OS=Arabidopsis thaliana OX=3702 GN=BHLH107 PE=3 SV=1	K	Transcription	PREDICTED: putative transcription factor bHLH107 [Cucumis sativus]
Cla97C07G131490	197	344	826	78	197	78	7.69655	8.75467	23.7125	2.26766	4.46343	2.01582	0.000109191	-2.33457	down	--	--	Molecular Function: cation binding (GO:0043169);;	--	--	[R]	General function prediction only	C2H2-type zinc finger;; C2H2-type zinc finger	sp|Q9SLD4|ZAT11_ARATH Zinc finger protein ZAT11 OS=Arabidopsis thaliana OX=3702 GN=ZAT11 PE=2 SV=1	S	Function unknown	zinc finger protein ZAT12-like [Cucurbita pepo subsp. pepo]
Cla97C03G053660	158	526	439	110	218	206	4.54582	9.84788	9.27524	2.36888	3.64414	3.96234	0.00201795	-1.35293	down	--	--	--	--	--	--	--	Protein of unknown function (DUF1635)	--	S	Function unknown	PREDICTED: arp2/3 complex-activating protein rickA [Cucumis melo]
Cla97C01G000230	3217	9076	14545	2227	3729	4003	161.167	296.312	535.393	83.8118	108.611	134.086	0.000486182	-1.72486	down	[CI]	Energy production and conversion;; Lipid transport and metabolism	Cellular Component: intrinsic component of membrane (GO:0031224);; Molecular Function: cation binding (GO:0043169);; Molecular Function: tetrapyrrole binding (GO:0046906);;	K23490|2.58336e-93|csv:101207109|cytochrome b5	--	[C]	Energy production and conversion	Cytochrome b5-like Heme/Steroid binding domain	sp|Q42342|CYB5E_ARATH Cytochrome b5 isoform E OS=Arabidopsis thaliana OX=3702 GN=CYTB5-E PE=1 SV=2	C	Energy production and conversion	PREDICTED: cytochrome b5 isoform E [Cucumis sativus]
Cla97C10G194260	948	1486	1849	206	631	472	19.6496	20.0812	28.171	3.2061	7.60522	6.53379	2.63e-07	-2.08684	down	[G]	Carbohydrate transport and metabolism	Cellular Component: intrinsic component of membrane (GO:0031224);;	--	--	--	--	NHL repeat	--	S	Function unknown	PREDICTED: uncharacterized protein LOC101220240 [Cucumis sativus]
Cla97C02G041730	1150	2605	4154	858	1407	875	43.2066	63.7765	114.679	24.2046	30.7299	21.9809	0.000135002	-1.65374	down	--	--	Cellular Component: endoplasmic reticulum membrane (GO:0005789);; Biological Process: protein processing (GO:0016485);; Molecular Function: hydrolase activity (GO:0016787);; Cellular Component: intrinsic component of membrane (GO:0031224);;	K12948|4.48827e-116|cmo:103495199|Spp; signal peptidase complex subunit 3B	Protein export (ko03060)	[U]	Intracellular trafficking, secretion, and vesicular transport	Signal peptidase subunit	sp|Q53YF3|SPC3B_ARATH Signal peptidase complex subunit 3B OS=Arabidopsis thaliana OX=3702 GN=At5g27430 PE=2 SV=1	U	Intracellular trafficking, secretion, and vesicular transport	PREDICTED: signal peptidase complex subunit 3B [Cucumis melo]
Cla97C11G211050	1501	3923	2738	706	1559	1054	32.8411	55.9594	44.0185	11.6043	19.8265	15.4109	3.74e-07	-1.60987	down	[R]	General function prediction only	--	K23050|0|cmo:103499681|isoflavone reductase homolog	--	--	--	NmrA-like family;; NAD(P)H-binding;; NAD dependent epimerase/dehydratase family;; GDP-mannose 4,6 dehydratase;; 3-beta hydroxysteroid dehydrogenase/isomerase family	sp|O81355|PYRC5_PYRCO Phenylcoumaran benzylic ether reductase Pyrc5 OS=Pyrus communis OX=23211 GN=PYRC5 PE=1 SV=1	S	Function unknown	PREDICTED: isoflavone reductase homolog [Cucumis melo]
Cla97C05G088710	1757	3570	3146	526	717	457	70.2844	93.0979	92.4949	15.8117	16.6603	12.2265	1.08e-27	-2.62583	down	--	--	Biological Process: response to hormone (GO:0009725);;	K14488|4.07266e-100|cmo:103483942|auxin-responsive protein SAUR36-like	Plant hormone signal transduction (ko04075)	--	--	Auxin responsive protein	sp|O22150|SAU36_ARATH Auxin-responsive protein SAUR36 OS=Arabidopsis thaliana OX=3702 GN=SAUR36 PE=2 SV=1	S	Function unknown	PREDICTED: auxin-responsive protein SAUR36-like [Cucumis melo]
Cla97C09G162580	1303	2707	3845	873	1526	1035	48.1457	65.1798	104.387	24.2436	32.7851	25.5619	5.26e-05	-1.52128	down	--	--	Cellular Component: intrinsic component of membrane (GO:0031224);;	--	--	--	--	--	--	221		PREDICTED: uncharacterized protein LOC103500733 isoform X2 [Cucumis melo]
Cla97C04G074330	303	1061	1785	60	203	21	22.5196	51.35	97.4321	3.30431	8.74178	0.999811	1.42e-06	-3.85686	down	--	--	Cellular Component: intrinsic component of membrane (GO:0031224);; Biological Process: response to stimulus (GO:0050896);;	--	--	--	--	--	--	64		hypothetical protein Csa_018195 [Cucumis sativus]
Cla97C06G122540	747	1334	1263	370	733	770	16.9477	19.7206	21.0523	6.3074	9.66496	11.6839	0.00026829	-1.1671	down	--	--	--	--	--	--	--	Phloem protein 2	sp|Q9ZVQ6|P2B10_ARATH F-box protein PP2-B10 OS=Arabidopsis thaliana OX=3702 GN=PP2B10 PE=1 SV=1	S	Function unknown	F-box protein PP2-B10-like [Cucumis melo var. makuwa]
Cla97C01G006910	88	1447	2513	12	180	15	0.527121	5.68649	11.1374	0.051332	0.631124	0.059782	2.99e-05	-4.71316	down	--	--	Cellular Component: intrinsic component of membrane (GO:0031224);; Molecular Function: 5'-3' RNA polymerase activity (GO:0034062);; Biological Process: nucleic acid-templated transcription (GO:0097659);;	K11699|0|csv:101213473|probable RNA-dependent RNA polymerase 1	--	[A]	RNA processing and modification	RNA dependent RNA polymerase	sp|Q9LQV2|RDR1_ARATH RNA-dependent RNA polymerase 1 OS=Arabidopsis thaliana OX=3702 GN=RDR1 PE=2 SV=1	A	RNA processing and modification	hypothetical protein Csa_007966 [Cucumis sativus]
Cla97C11G211300	2229	4651	4035	1461	3012	2013	28.441	38.6731	37.8293	14.0022	22.3422	17.174	5.43e-05	-1.08288	down	[G]	Carbohydrate transport and metabolism	Molecular Function: oxidoreductase activity, acting on the CH-CH group of donors, NAD or NADP as acceptor (GO:0016628);; Molecular Function: transmembrane transporter activity (GO:0022857);; Cellular Component: intrinsic component of membrane (GO:0031224);; Biological Process: single-organism metabolic process (GO:0044710);; Biological Process: single-organism transport (GO:0044765);;	--	--	[R]	General function prediction only	Sugar (and other) transporter;; Major Facilitator Superfamily	sp|Q8VZ80|PLT5_ARATH Polyol transporter 5 OS=Arabidopsis thaliana OX=3702 GN=PLT5 PE=1 SV=2	U	Intracellular trafficking, secretion, and vesicular transport	Polyol transporter 5 [Cucumis melo var. makuwa]
Cla97C00G000150	10629	32630	24799	12860	13174	12659	72.613	145.276	124.48	66.0133	52.3234	57.8213	0.00130163	-1.05795	down	[C]	Energy production and conversion	Molecular Function: hydro-lyase activity (GO:0016836);; Molecular Function: iron-sulfur cluster binding (GO:0051536);;	K01681|0|cmos:111455127|aconitate hydratase, cytoplasmic-like	Citrate cycle (TCA cycle) (ko00020);; Glyoxylate and dicarboxylate metabolism (ko00630);; Carbon metabolism (ko01200);; 2-Oxocarboxylic acid metabolism (ko01210);; Biosynthesis of amino acids (ko01230)	[AJ]	RNA processing and modification;; Translation, ribosomal structure and biogenesis	Aconitase family (aconitate hydratase);; Aconitase C-terminal domain	sp|P49608|ACOC_CUCMA Aconitate hydratase, cytoplasmic OS=Cucurbita maxima OX=3661 PE=2 SV=1	C	Energy production and conversion	aconitate hydratase [Cucumis melo var. makuwa]
Cla97C10G186790	98	1069	1070	27	124	69	4.60736	32.9259	37.1515	0.927576	3.38906	2.17878	4.16e-06	-3.63805	down	--	--	--	--	--	--	--	Probable lipid transfer	--	S	Function unknown	uncharacterized protein E5676_scaffold1017G00830 [Cucumis melo var. makuwa]
Cla97C02G041940	171	498	1501	139	299	68	6.82137	12.9711	44.137	4.16132	6.95193	1.81451	0.00165145	-2.46197	down	--	--	Molecular Function: small molecule binding (GO:0036094);; Molecular Function: organic cyclic compound binding (GO:0097159);; Molecular Function: heterocyclic compound binding (GO:1901363);;	--	--	--	--	--	--	T	Signal transduction mechanisms	PREDICTED: TMV resistance protein N-like [Cucumis melo]
Cla97C04G079110	215	3216	2806	123	375	210	6.21334	60.5722	59.5846	2.66312	6.28811	4.05499	9.22e-06	-3.39834	down	--	--	Cellular Component: membrane (GO:0016020);;	--	--	[T]	Signal transduction mechanisms	EF hand;; EF-hand domain;; EF-hand domain pair;; EF hand;; EF-hand domain pair	sp|Q93Z27|CML46_ARATH Probable calcium-binding protein CML46 OS=Arabidopsis thaliana OX=3702 GN=CML46 PE=1 SV=1	T	Signal transduction mechanisms	putative calcium-binding protein CML30 [Cucumis melo var. makuwa]
Cla97C10G192440	2572	7720	14131	3130	4795	3241	61.2369	119.813	247.264	55.9974	66.3792	51.5949	0.00650834	-1.43015	down	[T]	Signal transduction mechanisms	Molecular Function: phosphoprotein phosphatase activity (GO:0004721);; Biological Process: cellular protein modification process (GO:0006464);;	K17506|0|mcha:111011477|probable protein phosphatase 2C 9	--	[T]	Signal transduction mechanisms	Protein phosphatase 2C;; Stage II sporulation protein E (SpoIIE)	sp|Q9LME4|P2C09_ARATH Probable protein phosphatase 2C 9 OS=Arabidopsis thaliana OX=3702 GN=At1g22280 PE=1 SV=1	T	Signal transduction mechanisms	probable protein phosphatase 2C 9 [Momordica charantia]
Cla97C02G034530	635	1108	1247	457	663	506	26.1715	29.7694	37.7567	14.1495	15.8905	13.9315	2.53e-06	-1.20402	down	--	--	Cellular Component: intrinsic component of membrane (GO:0031224);;	K22145|2.72826e-100|cmos:111453119|transmembrane protein 18	--	[R]	General function prediction only	Transmembrane protein 18	sp|Q5F410|TMM18_CHICK Transmembrane protein 18 OS=Gallus gallus OX=9031 GN=TMEM18 PE=2 SV=1	S	Function unknown	transmembrane protein 18 [Cucurbita moschata]
Cla97C02G040090	1307	2586	3868	1133	1774	980	84.9503	109.57	184.808	55.3385	67.0639	42.5715	0.000768655	-1.32666	down	--	--	--	K03873|3.03053e-66|cmo:103493547|uncharacterized LOC103493547	Ubiquitin mediated proteolysis (ko04120)	[K]	Transcription	Ubiquitin family	--	K	Transcription	PREDICTED: uncharacterized protein LOC103493547 isoform X1 [Cucumis melo]
Cla97C04G078000	2180	3763	3547	1594	2515	1637	139.072	156.474	166.259	76.4089	93.2729	69.8208	1.74e-07	-1.05824	down	--	--	--	K03966|3.41758e-55|csv:101213094|NADH dehydrogenase [ubiquinone] 1 beta subcomplex subunit 10-B	Oxidative phosphorylation (ko00190)	[C]	Energy production and conversion	NADH-ubiquinone oxidoreductase subunit 10	sp|Q94C12|NDBAB_ARATH NADH dehydrogenase [ubiquinone] 1 beta subcomplex subunit 10-B OS=Arabidopsis thaliana OX=3702 GN=At3g18410 PE=3 SV=1	C	Energy production and conversion	PREDICTED: NADH dehydrogenase [ubiquinone] 1 beta subcomplex subunit 10-B [Cucumis sativus]
Cla97C06G125140	160	970	301	25	140	110	1.73141	6.84721	2.39066	0.197149	0.880127	0.79669	0.00025294	-2.63328	down	--	--	Molecular Function: nucleic acid binding (GO:0003676);; Biological Process: DNA metabolic process (GO:0006259);; Cellular Component: intracellular membrane-bounded organelle (GO:0043231);;	K07466|0|csv:101208545|replication protein A 70 kDa DNA-binding subunit B	DNA replication (ko03030);; Nucleotide excision repair (ko03420);; Mismatch repair (ko03430);; Homologous recombination (ko03440)	[L]	Replication, recombination and repair	Replication factor-A C terminal domain;; Replication protein A OB domain;; Replication factor-A protein 1, N-terminal domain;; OB-fold nucleic acid binding domain;; Domain of unknown function DUF223	sp|Q9SD82|RFA1B_ARATH Replication protein A 70 kDa DNA-binding subunit B OS=Arabidopsis thaliana OX=3702 GN=RPA1B PE=3 SV=1	L	Replication, recombination and repair	PREDICTED: replication protein A 70 kDa DNA-binding subunit B-like [Cucumis sativus]
Cla97C09G177070	889	2594	1307	491	782	851	17.4212	33.1339	18.8195	7.22648	8.9107	11.1467	4.73e-05	-1.43651	down	[QR]	Secondary metabolites biosynthesis, transport and catabolism;; General function prediction only	Molecular Function: catalytic activity (GO:0003824);; Biological Process: single-organism metabolic process (GO:0044710);; Molecular Function: transition metal ion binding (GO:0046914);;	--	--	[R]	General function prediction only	Zinc-binding dehydrogenase;; N-terminal domain of oxidoreductase;; Zinc-binding dehydrogenase	sp|Q9SLN8|DBR_TOBAC 2-alkenal reductase (NADP(+)-dependent) OS=Nicotiana tabacum OX=4097 GN=DBR PE=1 SV=1	S	Function unknown	hypothetical protein Csa_017204 [Cucumis sativus]
Cla97C02G035770	261	660	1222	264	497	259	7.39928	12.2145	25.5091	5.6203	8.19861	4.91303	0.00881116	-1.40169	down	[F]	Nucleotide transport and metabolism	Molecular Function: protein binding (GO:0005515);; Biological Process: DNA metabolic process (GO:0006259);; Biological Process: nucleoside monophosphate biosynthetic process (GO:0009124);; Molecular Function: deoxynucleoside kinase activity (GO:0019136);; Molecular Function: purine ribonucleoside binding (GO:0032550);;	K00857|9.7705e-146|cmo:103502126|thymidine kinase	Pyrimidine metabolism (ko00240)	[F]	Nucleotide transport and metabolism	Thymidine kinase	sp|Q9S750|KITHA_ARATH Thymidine kinase a OS=Arabidopsis thaliana OX=3702 GN=TK1A PE=1 SV=1	F	Nucleotide transport and metabolism	PREDICTED: thymidine kinase [Cucumis melo]
Cla97C08G151500	3239	4062	8635	972	945	1077	23.9129	19.5416	46.846	5.38974	4.05492	5.31501	2.3e-10	-2.73156	down	--	--	--	--	--	[T]	Signal transduction mechanisms	T-complex protein 11	sp|Q9NUJ3|T11L1_HUMAN T-complex protein 11-like protein 1 OS=Homo sapiens OX=9606 GN=TCP11L1 PE=1 SV=1	T	Signal transduction mechanisms	uncharacterized protein LOC111808569 [Cucurbita pepo subsp. pepo]
Cla97C01G006800	1294	3932	4772	803	2542	1207	28.5915	56.6324	77.4868	13.3233	32.6524	17.8328	0.00298084	-1.48033	down	--	--	Cellular Component: intrinsic component of membrane (GO:0031224);;	--	--	--	--	Salt stress response/antifungal	sp|Q0WPN8|PDLP7_ARATH Plasmodesmata-located protein 7 OS=Arabidopsis thaliana OX=3702 GN=PDLP7 PE=1 SV=1	S	Function unknown	PREDICTED: cysteine-rich repeat secretory protein 12-like isoform X1 [Cucumis melo]
Cla97C11G218820	110	149	147	86	85	52	8.60482	7.61583	8.49164	5.05651	3.85065	2.69643	0.0021501	-1.19164	down	--	--	--	--	--	--	--	--	--	70		PREDICTED: serine/threonine-protein kinase CDG1 isoform X2 [Cucumis melo]
Cla97C07G143950	1493	5881	8435	1093	2015	1010	35.303	90.6216	146.562	19.4121	27.6953	15.958	3.41e-05	-2.24122	down	--	--	Cellular Component: intrinsic component of membrane (GO:0031224);; Cellular Component: intracellular membrane-bounded organelle (GO:0043231);;	K13989|2.81148e-157|csv:101206161|derlin-1.1 isoform X1	Protein processing in endoplasmic reticulum (ko04141)	[S]	Function unknown	Der1-like family	sp|Q8VZU9|DERL1_ARATH Derlin-1 OS=Arabidopsis thaliana OX=3702 GN=DER1 PE=2 SV=1	S	Function unknown	PREDICTED: derlin-1.1 isoform X1 [Cucumis sativus]
Cla97C08G153320	4184	10954	11855	2355	4190	4308	78.8159	134.482	164.093	33.338	45.8842	54.2543	2.19e-05	-1.60982	down	[M]	Cell wall/membrane/envelope biogenesis	Molecular Function: isomerase activity (GO:0016853);; Biological Process: cellulose metabolic process (GO:0030243);;	K13379|0|csv:101221070|probable UDP-arabinopyranose mutase 1	Amino sugar and nucleotide sugar metabolism (ko00520)	--	--	Reversibly glycosylated polypeptide	sp|Q8RU27|RGP2_SOLTU Probable UDP-arabinopyranose mutase 2 OS=Solanum tuberosum OX=4113 GN=UPTG2 PE=1 SV=1	S	Function unknown	PREDICTED: alpha-1,4-glucan-protein synthase [UDP-forming] [Cucumis sativus]
Cla97C11G223220	64	102	132	30	53	24	3.00949	3.12708	4.56479	1.04675	1.43144	0.746184	0.000145163	-1.83295	down	[J]	Translation, ribosomal structure and biogenesis	Molecular Function: nucleic acid binding (GO:0003676);; Molecular Function: catalytic activity (GO:0003824);; Molecular Function: structural molecule activity (GO:0005198);; Cellular Component: plastid (GO:0009536);; Biological Process: gene expression (GO:0010467);; Cellular Component: ribosomal subunit (GO:0044391);;	K02886|1.8461e-94|mcha:36165275|rpl2, C4D86_pgp024; ribosomal protein L2	Ribosome (ko03010)	[J]	Translation, ribosomal structure and biogenesis	Ribosomal Proteins L2, C-terminal domain	sp|Q4VZK5|RK2_CUCSA 50S ribosomal protein L2, chloroplastic OS=Cucumis sativus OX=3659 GN=rpl2-A PE=3 SV=1	J	Translation, ribosomal structure and biogenesis	ribosomal protein L2 [Cucumis melo var. makuwa]
Cla97C05G088220	909	1980	2372	253	1108	551	40.1562	57.0392	77.0268	8.38428	28.4732	16.282	0.000250931	-1.84226	down	--	--	Molecular Function: metal ion binding (GO:0046872);;	K02183|3.57879e-93|cmo:103483899|calmodulin	MAPK signaling pathway - plant (ko04016);; Phosphatidylinositol signaling system (ko04070);; Plant-pathogen interaction (ko04626)	[T]	Signal transduction mechanisms	EF hand;; EF hand;; EF-hand domain pair;; EF-hand domain;; EF-hand domain pair	sp|Q9FDX6|CP1_ARATH Calcium-binding protein CP1 OS=Arabidopsis thaliana OX=3702 GN=CP1 PE=2 SV=1	T	Signal transduction mechanisms	PREDICTED: calmodulin [Cucumis melo]
Cla97C06G120960	724	1885	2417	669	1230	704	13.9878	23.7317	34.3097	9.70225	13.8137	9.08295	0.00220159	-1.26685	down	[Q]	Secondary metabolites biosynthesis, transport and catabolism	Molecular Function: catalytic activity (GO:0003824);; Molecular Function: cation binding (GO:0043169);; Biological Process: single-organism metabolic process (GO:0044710);;	--	--	[QR]	Secondary metabolites biosynthesis, transport and catabolism;; General function prediction only	non-haem dioxygenase in morphine synthesis N-terminal;; 2OG-Fe(II) oxygenase superfamily	sp|O80449|DIOX4_ARATH Probable 2-oxoglutarate-dependent dioxygenase ANS OS=Arabidopsis thaliana OX=3702 GN=ANS PE=2 SV=1	Q	Secondary metabolites biosynthesis, transport and catabolism	protein SRG1-like [Cucumis melo var. makuwa]
Cla97C05G092590	972	1352	2026	78	403	497	15.5749	14.1135	23.8514	0.931802	3.75251	5.31525	4.73e-05	-2.53334	down	[K]	Transcription	Biological Process: phosphate-containing compound metabolic process (GO:0006796);; Molecular Function: transferase activity, transferring phosphorus-containing groups (GO:0016772);;	--	--	--	--	Leucine rich repeat	sp|Q8W3M4|Y4744_ARATH Uncharacterized protein At4g06744 OS=Arabidopsis thaliana OX=3702 GN=At4g06744 PE=2 SV=1	S	Function unknown	PREDICTED: uncharacterized protein At4g06744-like [Cucumis melo]
Cla97C05G105450	951	2945	3420	855	1787	1134	13.5959	27.439	35.9296	9.17969	14.8484	10.8383	0.00347553	-1.2634	down	[G]	Carbohydrate transport and metabolism	--	--	--	[GC]	Carbohydrate transport and metabolism;; Energy production and conversion	UDP-glucoronosyl and UDP-glucosyl transferase	sp|Q9LZD8|U89A2_ARATH UDP-glycosyltransferase 89A2 OS=Arabidopsis thaliana OX=3702 GN=UGT89A2 PE=2 SV=1	CG	Energy production and conversion;; Carbohydrate transport and metabolism	hypothetical protein Csa_000845 [Cucumis sativus]
Cla97C02G044280	341	594	449	263	282	297	7.82542	8.89414	7.58177	4.53693	3.76766	4.5561	9.95e-06	-1.01679	down	--	--	Cellular Component: membrane (GO:0016020);;	--	--	--	--	Protein of unknown function (DUF1084)	sp|Q402F4|TOM1_TOBAC Tobamovirus multiplication protein 1 OS=Nicotiana tabacum OX=4097 GN=TOM1 PE=1 SV=1	S	Function unknown	PREDICTED: tobamovirus multiplication protein 1 isoform X1 [Cucumis melo]
Cla97C04G079460	499	282	300	110	229	114	7.00317	2.5819	3.09492	1.16195	1.86852	1.06322	0.000609856	-1.74022	down	--	--	--	--	--	[O]	Posttranslational modification, protein turnover, chaperones	Myb-like DNA-binding domain	sp|B3H5A8|RVE7_ARATH Protein REVEILLE 7 OS=Arabidopsis thaliana OX=3702 GN=RVE7 PE=2 SV=1	K	Transcription	PREDICTED: protein REVEILLE 2-like [Cucumis melo]
Cla97C01G004300	1182	542	111	79	259	225	31.8336	9.50372	2.19502	1.58551	4.05286	4.0441	0.00850346	-2.2563	down	[G]	Carbohydrate transport and metabolism	Cellular Component: plant-type vacuole (GO:0000325);; Molecular Function: transporter activity (GO:0005215);; Cellular Component: plastid (GO:0009536);; Cellular Component: intrinsic component of membrane (GO:0031224);; Cellular Component: vacuolar part (GO:0044437);; Biological Process: establishment of localization (GO:0051234);;	K09873|6.08192e-140|cmo:103482603|probable aquaporin TIP2-2	--	[G]	Carbohydrate transport and metabolism	Major intrinsic protein	sp|Q41975|TIP22_ARATH Probable aquaporin TIP2-2 OS=Arabidopsis thaliana OX=3702 GN=TIP2-2 PE=1 SV=2	G	Carbohydrate transport and metabolism	PREDICTED: probable aquaporin TIP2-2 [Cucumis melo]
Cla97C02G027950	1697	2982	5013	1308	2528	1394	43.4587	49.7865	94.3563	25.1684	37.6441	23.8697	0.00253573	-1.24355	down	--	--	Biological Process: response to stimulus (GO:0050896);;	--	--	--	--	Universal stress protein family	sp|Q8L4N1|PHO34_ARATH Universal stress protein PHOS34 OS=Arabidopsis thaliana OX=3702 GN=PHOS34 PE=1 SV=1	S	Function unknown	PREDICTED: uncharacterized protein LOC103495556 isoform X1 [Cucumis melo]
Cla97C02G049890	864	1355	620	27	236	85	17.1292	17.5123	9.02642	0.38948	2.71514	1.12091	1.06e-07	-3.47491	down	--	--	Molecular Function: catalytic activity (GO:0003824);; Biological Process: response to stress (GO:0006950);; Molecular Function: antioxidant activity (GO:0016209);; Biological Process: hydrogen peroxide metabolic process (GO:0042743);; Molecular Function: cation binding (GO:0043169);; Biological Process: single-organism metabolic process (GO:0044710);; Molecular Function: tetrapyrrole binding (GO:…	K00430|0|cmo:103491556|peroxidase 2-like	Phenylpropanoid biosynthesis (ko00940)	--	--	Peroxidase	sp|P19135|PER2_CUCSA Peroxidase 2 (Fragment) OS=Cucumis sativus OX=3659 PE=2 SV=1	Q	Secondary metabolites biosynthesis, transport and catabolism	PREDICTED: peroxidase 2-like [Cucumis melo]
Cla97C08G146680	628	4328	5990	344	934	570	10.9432	49.1593	76.7149	4.50134	9.46411	6.63983	1.88e-05	-2.86196	down	--	--	Cellular Component: intrinsic component of membrane (GO:0031224);;	--	--	--	--	--	--	221		hypothetical protein Csa_003583 [Cucumis sativus]
Cla97C07G128340	8851	11576	6452	4696	2905	4940	142.517	121.486	76.3337	56.813	27.1926	53.1782	0.000596085	-1.39272	down	--	--	--	--	--	--	--	--	--	705		PREDICTED: uncharacterized protein LOC103491343 [Cucumis melo]
Cla97C03G067620	2613	3484	2856	87	118	117	67.9517	59.061	54.5839	1.68694	1.78209	2.0329	7.04e-126	-5.14098	down	[O]	Posttranslational modification, protein turnover, chaperones	Molecular Function: protein binding (GO:0005515);; Biological Process: cellular process (GO:0009987);; Molecular Function: purine ribonucleoside binding (GO:0032550);; Biological Process: response to stimulus (GO:0050896);;	K04079|1.94261e-144|mcha:111013350|heat shock protein 90-2-like	Protein processing in endoplasmic reticulum (ko04141);; Plant-pathogen interaction (ko04626)	[O]	Posttranslational modification, protein turnover, chaperones	Histidine kinase-, DNA gyrase B-, and HSP90-like ATPase;; Hsp90 protein;; Histidine kinase-, DNA gyrase B-, and HSP90-like ATPase	sp|P36181|HSP80_SOLLC Heat shock cognate protein 80 OS=Solanum lycopersicum OX=4081 GN=HSC80 PE=2 SV=1	O	Posttranslational modification, protein turnover, chaperones	hypothetical protein ES288_D13G163100v1 [Gossypium darwinii]
Cla97C03G063620	175	1135	466	127	337	126	8.59702	36.5017	16.8771	4.68198	9.65021	4.12988	0.00229435	-1.84728	down	--	--	Cellular Component: chromatin (GO:0000785);; Molecular Function: nucleic acid binding (GO:0003676);; Cellular Component: intracellular membrane-bounded organelle (GO:0043231);; Molecular Function: protein dimerization activity (GO:0046983);;	K11253|8.4671e-78|zma:103636448|histone H3.2	--	[B]	Chromatin structure and dynamics	Core histone H2A/H2B/H3/H4	sp|P68429|H32_MEDSA Histone H3.2 OS=Medicago sativa OX=3879 GN=H3-1.1 PE=1 SV=2	B	Chromatin structure and dynamics	PREDICTED: histone H3.2 [Musa acuminata subsp. malaccensis]
Cla97C05G098720	796	4625	5618	847	1854	798	20.0672	76.0619	104.171	16.0479	27.1869	13.4583	0.00132974	-1.95078	down	[T]	Signal transduction mechanisms	Molecular Function: protein kinase activity (GO:0004672);; Cellular Component: membrane (GO:0016020);;	--	--	--	--	Protein tyrosine and serine/threonine kinase;; Protein kinase domain	sp|Q9FLV4|Y5248_ARATH G-type lectin S-receptor-like serine/threonine-protein kinase At5g24080 OS=Arabidopsis thaliana OX=3702 GN=At5g24080 PE=2 SV=1	T	Signal transduction mechanisms	PREDICTED: rust resistance kinase Lr10-like [Cucumis melo]
Cla97C06G119280	20979	39066	31695	12813	13209	14546	200.975	243.899	223.093	92.2299	73.5646	93.1626	9.11e-12	-1.46502	down	[O]	Posttranslational modification, protein turnover, chaperones	Molecular Function: protein binding (GO:0005515);; Biological Process: cellular process (GO:0009987);; Molecular Function: purine ribonucleoside binding (GO:0032550);;	K03283|0|cmo:103496889|stromal 70 kDa heat shock-related protein, chloroplastic	Spliceosome (ko03040);; Protein processing in endoplasmic reticulum (ko04141);; Endocytosis (ko04144)	[O]	Posttranslational modification, protein turnover, chaperones	Hsp70 protein;; MreB/Mbl protein	sp|Q02028|HSP7S_PEA Stromal 70 kDa heat shock-related protein, chloroplastic OS=Pisum sativum OX=3888 GN=HSP70 PE=2 SV=1	O	Posttranslational modification, protein turnover, chaperones	chloroplast HSP70 [Cucumis sativus]
Cla97C03G062100	502	1168	1425	331	592	384	10.9803	16.6496	22.9125	5.43913	7.5215	5.61626	2.55e-05	-1.56324	down	--	--	--	--	--	--	--	Thaumatin family	sp|P83332|TLP1_PRUPE Thaumatin-like protein 1 OS=Prunus persica OX=3760 PE=2 SV=1	T	Signal transduction mechanisms	thaumatin-like protein 1b isoform X2 [Cucurbita moschata]
Cla97C05G103780	305	1625	2353	371	549	412	6.69086	23.2529	37.9549	6.12098	6.99961	6.03962	0.00121671	-1.94893	down	[H]	Coenzyme transport and metabolism	Biological Process: fatty acid biosynthetic process (GO:0006633);; Molecular Function: transferase activity, transferring acyl groups other than amino-acyl groups (GO:0016747);; Biological Process: protein modification process (GO:0036211);; Cellular Component: intracellular part (GO:0044424);;	K03801|0|cmo:103489357|plastidial lipoyltransferase 2-like	Lipoic acid metabolism (ko00785);; Biosynthesis of cofactors (ko01240)	[CH]	Energy production and conversion;; Coenzyme transport and metabolism	Biotin/lipoate A/B protein ligase family	sp|Q948J9|LIP2P_ARATH Octanoyltransferase LIP2p, chloroplastic OS=Arabidopsis thaliana OX=3702 GN=LIP2P PE=1 SV=1	CH	Energy production and conversion;; Coenzyme transport and metabolism	plastidial lipoyltransferase 2-like [Cucumis melo var. makuwa]
Cla97C11G223050	104	1623	5745	81	148	170	1.70022	17.4474	69.6229	0.996784	1.41886	1.86581	5.42e-06	-4.51221	down	[QV]	Secondary metabolites biosynthesis, transport and catabolism;; Defense mechanisms	--	--	--	[QI]	Secondary metabolites biosynthesis, transport and catabolism;; Lipid transport and metabolism	Cytochrome P450	sp|Q9LUC8|C7A13_ARATH Cytochrome P450 72A13 OS=Arabidopsis thaliana OX=3702 GN=CYP72A13 PE=2 SV=1	Q	Secondary metabolites biosynthesis, transport and catabolism	cytochrome P450 CYP72A219-like protein [Cucumis melo var. makuwa]
Cla97C10G204420	130	404	284	25	71	35	5.58281	11.3413	8.95983	0.787027	1.75614	0.986201	6.73e-10	-2.95875	down	--	--	--	--	--	--	--	--	sp|Q1JPP8|SMR4_ARATH Cyclin-dependent protein kinase inhibitor SMR4 OS=Arabidopsis thaliana OX=3702 GN=SMR4 PE=1 SV=1	84		hypothetical protein Csa_002137 [Cucumis sativus]
Cla97C11G222430	3064	6516	8775	3355	4849	2401	53.3962	74.0213	112.382	43.9336	49.1308	27.9755	0.00472784	-1.11001	down	[I]	Lipid transport and metabolism	Molecular Function: CoA hydrolase activity (GO:0016289);;	K05605|0|csv:101215537|3-hydroxyisobutyryl-CoA hydrolase-like protein 5 isoform X1	Valine, leucine and isoleucine degradation (ko00280);; beta-Alanine metabolism (ko00410);; Propanoate metabolism (ko00640);; Carbon metabolism (ko01200)	--	--	Enoyl-CoA hydratase/isomerase;; Enoyl-CoA hydratase/isomerase	sp|Q9SHJ8|HIBC8_ARATH 3-hydroxyisobutyryl-CoA hydrolase-like protein 5 OS=Arabidopsis thaliana OX=3702 GN=At1g06550 PE=1 SV=2	I	Lipid transport and metabolism	PREDICTED: 3-hydroxyisobutyryl-CoA hydrolase-like protein 5 isoform X2 [Cucumis melo]
Cla97C08G153160	1926	3847	10910	1126	2059	1057	25.6924	33.4366	106.934	11.2773	15.9683	9.4265	9.65e-05	-2.32315	down	[G]	Carbohydrate transport and metabolism	Molecular Function: hydrolase activity, acting on glycosyl bonds (GO:0016798);; Biological Process: primary metabolic process (GO:0044238);;	K01188|0|cmo:103488476|beta-glucosidase 40	Cyanoamino acid metabolism (ko00460);; Starch and sucrose metabolism (ko00500);; Phenylpropanoid biosynthesis (ko00940)	[G]	Carbohydrate transport and metabolism	Glycosyl hydrolase family 1	sp|Q9FZE0|BGL40_ARATH Beta-glucosidase 40 OS=Arabidopsis thaliana OX=3702 GN=BGLU40 PE=2 SV=1	G	Carbohydrate transport and metabolism	PREDICTED: beta-glucosidase 40 [Cucumis melo]
Cla97C11G220270	90	262	716	16	63	15	3.78832	7.20519	22.212	0.490901	1.53546	0.411597	1.97e-06	-3.90191	down	--	--	--	--	--	--	--	Protein of unknown function (DUF740)	--	121		uncharacterized protein LOC111476165 [Cucurbita maxima]
Cla97C07G133790	287	682	1360	32	176	17	4.27328	6.63522	14.9096	0.352121	1.52501	0.164443	4.59e-06	-3.81339	down	[T]	Signal transduction mechanisms	Molecular Function: ubiquitin-like protein transferase activity (GO:0019787);; Biological Process: protein modification by small protein conjugation (GO:0032446);;	--	--	--	--	U-box domain	sp|Q5PNY6|PUB21_ARATH U-box domain-containing protein 21 OS=Arabidopsis thaliana OX=3702 GN=PUB21 PE=2 SV=1	O	Posttranslational modification, protein turnover, chaperones	PREDICTED: U-box domain-containing protein 21-like [Cucumis sativus]
Cla97C07G134400	826	2676	2103	636	1323	1194	12.2191	25.802	22.8579	7.06159	11.376	11.8114	0.00442716	-1.11424	down	[E]	Amino acid transport and metabolism	Molecular Function: carboxypeptidase activity (GO:0004180);; Biological Process: protein metabolic process (GO:0019538);;	K09645|0|csv:101205133|serine carboxypeptidase-like 50	--	[OE]	Posttranslational modification, protein turnover, chaperones;; Amino acid transport and metabolism	Serine carboxypeptidase	sp|Q9M9Q6|SCP50_ARATH Serine carboxypeptidase-like 50 OS=Arabidopsis thaliana OX=3702 GN=SCPL50 PE=2 SV=1	O	Posttranslational modification, protein turnover, chaperones	PREDICTED: serine carboxypeptidase-like 50 isoform X1 [Cucumis sativus]
Cla97C10G197650	2368	16051	11018	1008	2808	1510	33.4995	148.005	114.544	10.7142	23.093	14.2812	1.43e-06	-2.73491	down	[MDT]	Cell wall/membrane/envelope biogenesis;; Cell cycle control, cell division, chromosome partitioning;; Signal transduction mechanisms	--	--	--	[O]	Posttranslational modification, protein turnover, chaperones	Domain associated at C-terminal with AAA;; ATPase family associated with various cellular activities (AAA);; Holliday junction DNA helicase RuvB P-loop domain	sp|Q9FLD5|ASD_ARATH AAA-ATPase ASD, mitochondrial OS=Arabidopsis thaliana OX=3702 GN=AATP1 PE=1 SV=1	O	Posttranslational modification, protein turnover, chaperones	AAA-ATPase ASD, mitochondrial-like [Cucurbita pepo subsp. pepo]
Cla97C01G011140	987	2685	4194	686	1332	1300	18.1867	32.2427	56.7835	9.49474	14.2688	16.0112	0.00155917	-1.55209	down	[C]	Energy production and conversion	Molecular Function: catalytic activity (GO:0003824);; Biological Process: single-organism metabolic process (GO:0044710);;	--	--	[C]	Energy production and conversion	Pyridine nucleotide-disulphide oxidoreductase;; Pyridine nucleotide-disulphide oxidoreductase;; Lycopene cyclase protein;; FAD-NAD(P)-binding;; L-lysine 6-monooxygenase (NADPH-requiring)	sp|Q54NS9|AIFA_DICDI Apoptosis-inducing factor homolog A OS=Dictyostelium discoideum OX=44689 GN=aifA PE=3 SV=1	C	Energy production and conversion	PREDICTED: apoptosis-inducing factor 2-like [Cucumis sativus]
Cla97C05G091730	1796	22812	13710	1540	2262	3568	11.2161	92.8422	62.9085	7.22587	8.20943	14.8957	0.000262914	-2.54926	down	[K]	Transcription	--	--	--	[R]	General function prediction only	Leucine rich repeat;; Leucine Rich repeats (2 copies);; Leucine rich repeat N-terminal domain	sp|Q6JN47|EIX1_SOLLC Receptor-like protein EIX1 OS=Solanum lycopersicum OX=4081 GN=EIX1 PE=2 SV=2	S	Function unknown	probable inactive leucine-rich repeat receptor kinase XIAO [Cucurbita maxima]
Cla97C09G181160	158	273	97	23	104	55	3.06598	3.45289	1.38241	0.334329	1.17238	0.713819	0.00150396	-1.92755	down	[T]	Signal transduction mechanisms	Molecular Function: protein kinase activity (GO:0004672);; Biological Process: protein phosphorylation (GO:0006468);; Molecular Function: purine ribonucleoside binding (GO:0032550);;	--	--	[T]	Signal transduction mechanisms	Protein tyrosine and serine/threonine kinase;; Protein kinase domain	sp|Q65XV8|RK176_ORYSJ Receptor-like cytoplasmic kinase 176 OS=Oryza sativa subsp. japonica OX=39947 GN=RLCK176 PE=1 SV=1	T	Signal transduction mechanisms	PREDICTED: protein kinase APK1B, chloroplastic-like [Cucumis sativus]
Cla97C01G012980	3201	12871	32654	3367	8501	2008	22.3184	58.4832	167.289	17.6368	34.4575	9.3608	0.00402025	-2.17094	down	--	--	Biological Process: translation (GO:0006412);; Molecular Function: translation factor activity, RNA binding (GO:0008135);;	K11593|0|cmo:103500648|protein argonaute 5	--	[J]	Translation, ribosomal structure and biogenesis	Piwi domain;; N-terminal domain of argonaute;; PAZ domain;; Argonaute linker 1 domain;; Argonaute linker 2 domain;; Mid domain of argonaute	sp|Q9SJK3|AGO5_ARATH Protein argonaute 5 OS=Arabidopsis thaliana OX=3702 GN=AGO5 PE=1 SV=2	J	Translation, ribosomal structure and biogenesis	PREDICTED: protein argonaute 5 [Cucumis melo]
Cla97C10G185910	901	3139	3235	1162	1605	1221	52.512	119.273	138.548	50.872	54.4042	47.5953	0.00588726	-1.13456	down	--	--	Molecular Function: oligosaccharyl transferase activity (GO:0004576);; Cellular Component: endoplasmic reticulum membrane (GO:0005789);; Biological Process: cellular protein modification process (GO:0006464);; Cellular Component: intrinsic component of membrane (GO:0031224);;	K12668|6.12403e-77|mcha:111014909|dolichyl-diphosphooligosaccharide--protein glycosyltransferase subunit DAD1	N-Glycan biosynthesis (ko00510);; Various types of N-glycan biosynthesis (ko00513);; Protein processing in endoplasmic reticulum (ko04141)	[DO]	Cell cycle control, cell division, chromosome partitioning;; Posttranslational modification, protein turnover, chaperones	DAD family	sp|Q9M3T9|DAD1_BETPN Dolichyl-diphosphooligosaccharide--protein glycosyltransferase subunit DAD1 OS=Betula pendula OX=3505 GN=DAD1 PE=3 SV=1	DO	Cell cycle control, cell division, chromosome partitioning;; Posttranslational modification, protein turnover, chaperones	dolichyl-diphosphooligosaccharide--protein glycosyltransferase subunit DAD1 [Momordica charantia]
Cla97C10G199870	402	531	463	91	219	64	31.2136	26.8737	26.4262	5.25769	9.86804	3.28807	2.06e-07	-2.30879	down	--	--	--	--	--	--	--	--	--	S	Function unknown	PREDICTED: uncharacterized protein LOC105434988 [Cucumis sativus]
Cla97C10G205830	698	1642	2386	856	1066	765	46.7238	71.6491	117.393	43.0544	41.4864	34.2189	0.00717722	-1.10963	down	--	--	--	--	--	--	--	--	--	S	Function unknown	PREDICTED: uncharacterized protein LOC103486254 [Cucumis melo]
Cla97C07G133580	7967	30291	68270	4023	8275	6721	188.401	466.822	1186.24	71.4782	113.766	106.256	1.33e-05	-2.79556	down	--	--	Molecular Function: nucleic acid binding transcription factor activity (GO:0001071);; Molecular Function: DNA binding (GO:0003677);; Biological Process: transcription, DNA-templated (GO:0006351);; Cellular Component: intrinsic component of membrane (GO:0031224);;	--	--	--	--	WRKY DNA -binding domain	sp|Q93WU8|WRK54_ARATH Probable WRKY transcription factor 54 OS=Arabidopsis thaliana OX=3702 GN=WRKY54 PE=1 SV=2	K	Transcription	WRKY70 [Citrullus lanatus]
Cla97C06G122270	1393	2306	3100	867	1739	1229	22.2718	24.0193	36.4096	10.4085	16.1598	13.136	0.000334751	-1.17874	down	[GM]	Carbohydrate transport and metabolism;; Cell wall/membrane/envelope biogenesis	--	--	--	--	--	BNR repeat-like domain	--	G	Carbohydrate transport and metabolism	PREDICTED: uncharacterized protein LOC103494313 isoform X2 [Cucumis melo]
Cla97C06G127630	321	405	267	75	275	209	12.5898	10.3731	7.69228	2.20009	6.27783	5.47198	0.0092512	-1.2367	down	--	--	--	--	--	--	--	--	sp|F4IPE3|IDD15_ARATH Zinc finger protein SHOOT GRAVITROPISM 5 OS=Arabidopsis thaliana OX=3702 GN=SGR5 PE=1 SV=1	S	Function unknown	PREDICTED: protein indeterminate-domain 16 [Cucumis melo]
Cla97C03G062700	704	1820	3721	889	1307	690	15.4572	26.0385	60.0322	14.6603	16.6833	10.1182	0.00948248	-1.42689	down	[S]	Function unknown	--	--	--	--	--	--	sp|Q9LHN9|IQM2_ARATH IQ domain-containing protein IQM2 OS=Arabidopsis thaliana OX=3702 GN=IQM2 PE=2 SV=1	S	Function unknown	PREDICTED: uncharacterized protein LOC101218765 [Cucumis sativus]
Cla97C11G223980	1674	3820	4703	1352	2674	1452	39.8442	59.2757	82.2893	24.1776	37.0202	23.1041	0.00107424	-1.22897	down	[T]	Signal transduction mechanisms	Molecular Function: phosphoprotein phosphatase activity (GO:0004721);; Biological Process: cellular protein modification process (GO:0006464);;	K17506|0|csv:101215129|probable protein phosphatase 2C 39	--	[T]	Signal transduction mechanisms	Protein phosphatase 2C	sp|Q9LDA7|P2C39_ARATH Probable protein phosphatase 2C 39 OS=Arabidopsis thaliana OX=3702 GN=At3g15260 PE=2 SV=1	T	Signal transduction mechanisms	PREDICTED: probable protein phosphatase 2C 39 [Cucumis sativus]
Cla97C08G161340	370	998	1151	374	450	405	9.40615	16.5297	21.4938	7.1426	6.6468	6.87674	0.000677152	-1.31068	down	[O]	Posttranslational modification, protein turnover, chaperones	--	--	--	--	--	Fe-S metabolism associated domain	sp|Q9FXE3|SUFE2_ARATH SufE-like protein 2, chloroplastic OS=Arabidopsis thaliana OX=3702 GN=SUFE2 PE=2 SV=1	S	Function unknown	sufE-like protein 2 [Cucumis melo var. makuwa]
Cla97C06G112560	456	3149	2359	779	496	721	6.58475	29.6523	25.0454	8.45825	4.16084	6.96454	0.00342632	-1.7387	down	[G]	Carbohydrate transport and metabolism	Molecular Function: transferase activity, transferring glycosyl groups (GO:0016757);;	--	--	[GC]	Carbohydrate transport and metabolism;; Energy production and conversion	UDP-glucoronosyl and UDP-glucosyl transferase	sp|F8WKW0|UGT1_GARJA Crocetin glucosyltransferase, chloroplastic OS=Gardenia jasminoides OX=114476 GN=UGT75L6 PE=1 SV=1	CG	Energy production and conversion;; Carbohydrate transport and metabolism	PREDICTED: crocetin glucosyltransferase, chloroplastic-like [Cucumis melo]
Cla97C07G144510	56	137	366	29	115	23	5.42385	8.71966	26.2988	2.10748	6.53097	1.49947	0.00975657	-2.15369	down	--	--	Biological Process: mitotic sister chromatid segregation (GO:0000070);; Cellular Component: condensed chromosome (GO:0000793);; Molecular Function: purine ribonucleoside binding (GO:0032550);; Cellular Component: intracellular membrane-bounded organelle (GO:0043231);;	K06674|3.54088e-16|cpep:111810702|structural maintenance of chromosomes protein 2-1	--	[BD]	Chromatin structure and dynamics;; Cell cycle control, cell division, chromosome partitioning	--	sp|Q9C5Y4|SMC21_ARATH Structural maintenance of chromosomes protein 2-1 OS=Arabidopsis thaliana OX=3702 GN=SMC2-1 PE=2 SV=2	BD	Chromatin structure and dynamics;; Cell cycle control, cell division, chromosome partitioning	structural maintenance of chromosomes protein 2-1 [Cucurbita pepo subsp. pepo]
Cla97C09G164790	480	768	1756	309	446	252	20.2628	21.1318	54.5284	9.78964	10.9494	7.09541	0.000144333	-1.91693	down	--	--	--	--	--	--	--	--	--	S	Function unknown	PREDICTED: uncharacterized protein LOC101204433 [Cucumis sativus]
Cla97C07G134820	573	266	104	14	12	39	4.90599	1.48407	0.649328	0.087944	0.059404	0.223063	4.29e-07	-4.31214	down	[T]	Signal transduction mechanisms	Molecular Function: hydrogen ion transmembrane transporter activity (GO:0015078);; Biological Process: proton transport (GO:0015992);; Cellular Component: intrinsic component of membrane (GO:0031224);;	--	--	[P]	Inorganic ion transport and metabolism	Sodium/hydrogen exchanger family	sp|Q9FFR9|CHX18_ARATH Cation/H(+) antiporter 18 OS=Arabidopsis thaliana OX=3702 GN=CHX18 PE=2 SV=1	P	Inorganic ion transport and metabolism	PREDICTED: cation/H(+) antiporter 18-like [Cucumis sativus]
Cla97C10G205400	1960	2675	2248	1015	1643	1295	61.3602	54.5781	51.7107	23.8653	29.902	27.111	8.79e-11	-1.15595	down	[P]	Inorganic ion transport and metabolism	Cellular Component: chloroplast (GO:0009507);; Cellular Component: plastid part (GO:0044435);;	--	--	--	--	Rhodanese-like domain	sp|Q9SR92|STR10_ARATH Rhodanese-like domain-containing protein 10 OS=Arabidopsis thaliana OX=3702 GN=STR10 PE=2 SV=1	S	Function unknown	PREDICTED: rhodanese-like domain-containing protein 10 [Cucumis sativus]
Cla97C01G013020	560	834	1300	443	664	376	45.5836	44.247	77.8344	27.0781	31.4288	20.4642	0.00100906	-1.20938	down	--	--	Cellular Component: intrinsic component of membrane (GO:0031224);;	--	--	[R]	General function prediction only	Hypoxia induced protein conserved region	sp|Q7X843|ATL48_ARATH RING-H2 finger protein ATL48 OS=Arabidopsis thaliana OX=3702 GN=ATL48 PE=1 SV=2	S	Function unknown	PREDICTED: RING-H2 finger protein ATL48 [Cucumis sativus]
Cla97C09G171450	270	401	585	109	73	86	5.59446	5.41918	8.91709	1.68385	0.876947	1.18682	8.08e-09	-2.51417	down	[CR]	Energy production and conversion;; General function prediction only	Molecular Function: catalytic activity (GO:0003824);; Cellular Component: plastid envelope (GO:0009526);; Cellular Component: chloroplast thylakoid (GO:0009534);; Cellular Component: membrane (GO:0016020);; Biological Process: single-organism metabolic process (GO:0044710);; Molecular Function: transition metal ion binding (GO:0046914);;	K00224|0|cmo:103497587|putative quinone-oxidoreductase homolog, chloroplastic	alpha-Linolenic acid metabolism (ko00592)	[CR]	Energy production and conversion;; General function prediction only	Zinc-binding dehydrogenase;; Zinc-binding dehydrogenase;; Alcohol dehydrogenase GroES-like domain	sp|Q8H0M1|QORH_SPIOL Quinone-oxidoreductase homolog, chloroplastic OS=Spinacia oleracea OX=3562 GN=QOR PE=1 SV=1	C	Energy production and conversion	chloroplast envelope quinone oxidoreductase homolog [Cucurbita maxima]
Cla97C10G200440	1037	2671	3122	1175	1581	974	17.5274	29.4217	38.7787	14.9253	15.5329	11.0052	0.00199259	-1.16565	down	[P]	Inorganic ion transport and metabolism	Biological Process: cation transport (GO:0006812);; Molecular Function: ion transmembrane transporter activity (GO:0015075);; Cellular Component: intrinsic component of membrane (GO:0031224);;	K14692|0|csv:101220736|metal tolerance protein C2	--	[P]	Inorganic ion transport and metabolism	Cation efflux family	sp|Q6ICY4|MTPC2_ARATH Metal tolerance protein C2 OS=Arabidopsis thaliana OX=3702 GN=MTPC2 PE=2 SV=1	P	Inorganic ion transport and metabolism	PREDICTED: metal tolerance protein C2 [Cucumis sativus]
Cla97C05G101700	517	2515	6058	164	434	221	7.59279	24.0935	65.4395	1.80466	3.70808	2.16932	1.86e-07	-3.80599	down	--	--	Molecular Function: transferase activity, transferring acyl groups (GO:0016746);;	--	--	--	--	Transferase family	sp|Q9SND9|Y3028_ARATH Uncharacterized acetyltransferase At3g50280 OS=Arabidopsis thaliana OX=3702 GN=At3g50280 PE=3 SV=1	S	Function unknown	PREDICTED: uncharacterized acetyltransferase At3g50280-like [Cucumis melo]
Cla97C09G168660	35749	80378	41625	24779	35031	16522	1119.36	1640.19	957.65	582.986	637.696	345.88	4.21e-05	-1.3476	down	[O]	Posttranslational modification, protein turnover, chaperones	Molecular Function: catalytic activity (GO:0003824);;	K00799|4.66348e-150|cmo:103492839|glutathione S-transferase-like	Glutathione metabolism (ko00480)	[O]	Posttranslational modification, protein turnover, chaperones	Glutathione S-transferase, N-terminal domain;; Glutathione S-transferase, C-terminal domain;; Glutathione S-transferase, N-terminal domain;; Glutathione S-transferase, N-terminal domain;; Glutathione S-transferase, C-terminal domain;; Glutathione S-transferase, C-terminal domain	sp|P46423|GSTF_HYOMU Glutathione S-transferase OS=Hyoscyamus muticus OX=35626 PE=1 SV=1	O	Posttranslational modification, protein turnover, chaperones	PREDICTED: glutathione S-transferase-like [Cucumis melo]
Cla97C01G012650	2232	4745	6913	2269	2978	1107	138.49	191.861	315.167	105.756	107.416	45.9104	0.00235637	-1.44449	down	--	--	Cellular Component: intracellular part (GO:0044424);;	K13113|6.5902e-47|psom:113311929|ubiquitin-like protein 5	--	[O]	Posttranslational modification, protein turnover, chaperones	Ubiquitin family	sp|Q9FGZ9|UBL5_ARATH Ubiquitin-like protein 5 OS=Arabidopsis thaliana OX=3702 GN=UBL5 PE=3 SV=1	O	Posttranslational modification, protein turnover, chaperones	hypothetical protein EUGRSUZ_J00924, partial [Eucalyptus grandis]
Cla97C09G177360	868	1618	3192	901	990	784	39.4	47.8447	106.453	30.7298	26.1233	23.7643	0.00275059	-1.38958	down	--	--	--	--	--	--	--	--	--	256		PREDICTED: uncharacterized protein LOC101218756 [Cucumis sativus]
Cla97C01G007390	1178	2250	2502	987	1576	913	15.9259	19.8329	24.8601	10.0224	12.3922	8.25411	0.000176203	-1.10014	down	--	--	--	--	--	[R]	General function prediction only	--	sp|Q56XX3|Y2215_ARATH Uncharacterized protein At2g02148 OS=Arabidopsis thaliana OX=3702 GN=At2g02148 PE=2 SV=1	S	Function unknown	hypothetical protein Csa_017795 [Cucumis sativus]
Cla97C01G015360	455	533	540	267	397	224	20.0931	15.3445	17.5259	8.84377	10.1995	6.60233	3.36e-05	-1.15555	down	--	--	Cellular Component: intrinsic component of membrane (GO:0031224);;	--	--	--	--	Domain of unknown function (DUF588)	sp|Q66GI1|CSPLT_ARATH CASP-like protein 5C1 OS=Arabidopsis thaliana OX=3702 GN=At4g37235 PE=2 SV=1	S	Function unknown	PREDICTED: CASP-like protein ARALYDRAFT_485429 [Cucumis sativus]
Cla97C08G146670	2448	12608	16846	1712	2744	2496	48.9702	164.407	247.674	25.7407	31.9161	33.393	1.47e-05	-2.46009	down	--	--	Cellular Component: intrinsic component of membrane (GO:0031224);;	--	--	--	--	--	--	526		PREDICTED: uncharacterized protein LOC103504045 [Cucumis melo]
Cla97C03G061950	9181	15434	8501	3863	4470	7368	343.032	375.834	233.374	108.464	97.0868	184.076	0.000139513	-1.37367	down	[O]	Posttranslational modification, protein turnover, chaperones	Molecular Function: disulfide oxidoreductase activity (GO:0015036);; Biological Process: ether metabolic process (GO:0018904);; Biological Process: cellular homeostasis (GO:0019725);;	K03671|4.19414e-89|mcha:111023873|thioredoxin F-type, chloroplastic-like	--	[O]	Posttranslational modification, protein turnover, chaperones	Thioredoxin	sp|P29450|TRXF_PEA Thioredoxin F-type, chloroplastic OS=Pisum sativum OX=3888 PE=2 SV=1	O	Posttranslational modification, protein turnover, chaperones	thioredoxin F-type, chloroplastic-like [Momordica charantia]
Cla97C08G157940	320	566	1364	269	361	263	9.18691	10.6048	28.838	5.81416	6.0319	5.05073	0.00179557	-1.6571	down	[R]	General function prediction only	Biological Process: cytokinin metabolic process (GO:0009690);; Molecular Function: hydrolase activity, acting on glycosyl bonds (GO:0016798);;	K22522|7.29614e-159|cmo:103488033|cytokinin riboside 5'-monophosphate phosphoribohydrolase LOG1-like	--	--	--	Possible lysine decarboxylase;; SLOG cluster4 family	sp|Q8L8B8|LOG3_ARATH Cytokinin riboside 5&apos;-monophosphate phosphoribohydrolase LOG3 OS=Arabidopsis thaliana OX=3702 GN=LOG3 PE=1 SV=1	G	Carbohydrate transport and metabolism	PREDICTED: cytokinin riboside 5&apos;-monophosphate phosphoribohydrolase LOG1-like [Cucumis melo]
Cla97C10G196010	173	320	497	158	188	86	14.0474	16.9802	29.7211	9.65766	8.90499	4.64223	0.00188675	-1.51312	down	--	--	--	K03946|5.46167e-12|cpep:111789759|NADH dehydrogenase [ubiquinone] 1 alpha subcomplex subunit 2-like	Oxidative phosphorylation (ko00190)	[C]	Energy production and conversion	--	sp|Q9FIJ2|NDUA2_ARATH NADH dehydrogenase [ubiquinone] 1 alpha subcomplex subunit 2 OS=Arabidopsis thaliana OX=3702 GN=At5g47890 PE=3 SV=1	C	Energy production and conversion	NADH dehydrogenase [ubiquinone] 1 alpha subcomplex subunit 2-like [Cucurbita pepo subsp. pepo]
Cla97C05G087800	1029	2445	2783	410	1037	654	23.6582	36.6536	47.0367	7.08316	13.8636	10.05	1.33e-06	-1.9126	down	--	--	Cellular Component: intrinsic component of membrane (GO:0031224);; Molecular Function: transition metal ion binding (GO:0046914);;	--	--	[O]	Posttranslational modification, protein turnover, chaperones	Ring finger domain;; RING-like zinc finger;; Zinc finger, C3HC4 type (RING finger);; Zinc finger, C3HC4 type (RING finger)	sp|Q8L9T5|ATL2_ARATH RING-H2 finger protein ATL2 OS=Arabidopsis thaliana OX=3702 GN=ATL2 PE=2 SV=2	O	Posttranslational modification, protein turnover, chaperones	PREDICTED: RING-H2 finger protein ATL2 [Cucumis melo]
Cla97C06G124390	858	1090	1337	220	299	162	27.6115	22.8655	31.6161	5.31607	5.59322	3.46759	8.87e-18	-2.62749	down	--	--	--	--	--	[A]	RNA processing and modification	--	--	A	RNA processing and modification	uncharacterized protein E5676_scaffold629G00410 [Cucumis melo var. makuwa]
Cla97C09G165970	4504	8605	9232	3627	5126	3621	64.5362	80.3503	97.1919	39.0509	42.7011	34.685	3.12e-06	-1.16884	down	[C]	Energy production and conversion	Biological Process: citrate metabolic process (GO:0006101);; Molecular Function: citrate synthase activity (GO:0036440);;	K01647|0|cpep:111807433|citrate synthase, mitochondrial	Citrate cycle (TCA cycle) (ko00020);; Glyoxylate and dicarboxylate metabolism (ko00630);; Carbon metabolism (ko01200);; 2-Oxocarboxylic acid metabolism (ko01210);; Biosynthesis of amino acids (ko01230)	[C]	Energy production and conversion	Citrate synthase, C-terminal domain	sp|P49298|CISY_CITMA Citrate synthase, mitochondrial OS=Citrus maxima OX=37334 GN=CIT PE=2 SV=1	C	Energy production and conversion	citrate synthase, mitochondrial [Cucurbita pepo subsp. pepo]
Cla97C11G207400	117	329	747	105	232	87	0.948407	1.74628	4.47106	0.637755	1.0968	0.47225	0.00585482	-1.84089	down	[L]	Replication, recombination and repair	--	--	--	[A]	RNA processing and modification	AAA domain;; AAA domain;; AAA domain;; AAA domain;; Viral (Superfamily 1) RNA helicase;; Type III restriction enzyme, res subunit	sp|B6SFA4|MAA3_ARATH Probable helicase MAGATAMA 3 OS=Arabidopsis thaliana OX=3702 GN=MAA3 PE=2 SV=1	A	RNA processing and modification	PREDICTED: helicase SEN1-like [Cucumis melo]
Cla97C05G105510	14037	17700	22084	11162	13391	8982	146.956	120.764	169.883	87.8066	81.5043	62.8723	9e-05	-1.02799	down	--	--	Biological Process: phosphate-containing compound metabolic process (GO:0006796);; Molecular Function: transferase activity, transferring phosphorus-containing groups (GO:0016772);;	--	--	[T]	Signal transduction mechanisms	Phosphatidylinositol 3- and 4-kinase	sp|Q9SI52|P4KG7_ARATH Phosphatidylinositol 4-kinase gamma 7 OS=Arabidopsis thaliana OX=3702 GN=PI4KG7 PE=1 SV=2	T	Signal transduction mechanisms	PREDICTED: phosphatidylinositol 4-kinase gamma 5 [Cucumis melo]
Cla97C04G076040	3134	7906	15310	2716	3971	5086	58.379	95.9955	209.582	38.0241	43.0032	63.3456	0.00643282	-1.45538	down	--	--	--	--	--	[P]	Inorganic ion transport and metabolism	Heavy-metal-associated domain	sp|Q9LZF1|HIP6_ARATH Heavy metal-associated isoprenylated plant protein 6 OS=Arabidopsis thaliana OX=3702 GN=HIPP06 PE=1 SV=1	P	Inorganic ion transport and metabolism	heavy metal-associated isoprenylated plant protein 3-like isoform X2 [Cucumis melo var. makuwa]
Cla97C10G201050	624	1232	2333	759	897	554	21.6405	27.8425	59.4469	19.7784	18.0784	12.8457	0.00976393	-1.23124	down	--	--	--	--	--	--	--	--	sp|W5X2N3|AP_FRAAN Fra a 1-associated protein OS=Fragaria ananassa OX=3747 GN=AP PE=1 SV=1	S	Function unknown	PREDICTED: uncharacterized protein LOC103486704 [Cucumis melo]
Cla97C03G065200	318	213	136	36	111	91	13.5116	5.90452	4.2477	1.11998	2.74418	2.56076	0.00115611	-1.96626	down	--	--	--	--	--	--	--	Protein of unknown function (DUF1677)	--	S	Function unknown	PREDICTED: uncharacterized protein LOC101210029 [Cucumis sativus]
Cla97C02G047180	281	221	233	24	104	105	11.2327	5.74206	6.84356	0.694256	2.41506	2.80079	0.00047768	-2.10749	down	--	--	Cellular Component: intrinsic component of membrane (GO:0031224);;	--	--	--	--	--	--	S	Function unknown	PREDICTED: pollen-specific leucine-rich repeat extensin-like protein 1 [Cucumis melo]
Cla97C11G222680	4475	15823	17969	1139	1722	1597	32.8205	75.6418	96.8473	6.27487	7.34236	7.83045	1.64e-14	-3.37202	down	[O]	Posttranslational modification, protein turnover, chaperones	Cellular Component: plastid (GO:0009536);; Molecular Function: purine ribonucleoside binding (GO:0032550);; Cellular Component: vacuolar part (GO:0044437);;	K09486|0|cmo:103502499|heat shock 70 kDa protein 17	Protein processing in endoplasmic reticulum (ko04141)	[O]	Posttranslational modification, protein turnover, chaperones	Hsp70 protein	sp|F4JMJ1|HSP7R_ARATH Heat shock 70 kDa protein 17 OS=Arabidopsis thaliana OX=3702 GN=HSP70-17 PE=2 SV=1	O	Posttranslational modification, protein turnover, chaperones	PREDICTED: heat shock 70 kDa protein 17 [Cucumis melo]
Cla97C10G200740	3247	2958	5902	1315	1827	1228	103.098	61.2084	137.683	31.3652	33.7265	26.0668	9.45e-07	-1.85152	down	[J]	Translation, ribosomal structure and biogenesis	Molecular Function: small molecule binding (GO:0036094);; Molecular Function: organic cyclic compound binding (GO:0097159);;	K12900|1.28029e-49|csv:101216712|serine/arginine-rich SC35-like splicing factor SCL33 isoform X1	Spliceosome (ko03040)	[R]	General function prediction only	RNA recognition motif. (a.k.a. RRM, RBD, or RNP domain)	sp|Q9LHP2|SL30A_ARATH Serine/arginine-rich SC35-like splicing factor SCL30A OS=Arabidopsis thaliana OX=3702 GN=SCL30A PE=1 SV=1	A	RNA processing and modification	PREDICTED: serine/arginine-rich SC35-like splicing factor SCL33 isoform X1 [Cucumis sativus]
Cla97C10G193360	1513	1002	1762	63	492	15	142.045	61.3329	121.61	4.43697	26.8627	0.906495	0.000280018	-3.493	down	--	--	--	--	--	--	--	--	--	--	--	hypothetical protein Csa_015168 [Cucumis sativus]
Cla97C02G040920	6172	9779	12454	5318	5434	5266	237.173	244.898	351.636	153.548	121.393	135.299	7.06e-05	-1.13296	down	[O]	Posttranslational modification, protein turnover, chaperones	--	--	--	[O]	Posttranslational modification, protein turnover, chaperones	DnaJ domain	sp|Q8NHS0|DNJB8_HUMAN DnaJ homolog subfamily B member 8 OS=Homo sapiens OX=9606 GN=DNAJB8 PE=1 SV=1	O	Posttranslational modification, protein turnover, chaperones	PREDICTED: dnaJ homolog subfamily B member 8 [Cucumis melo]
Cla97C09G170480	1601	5872	9112	1702	1980	1351	40.3919	96.565	168.957	32.2698	29.0422	22.7932	0.000191828	-1.98721	down	[R]	General function prediction only	--	K24104|0|cpep:111806691|GPN-loop GTPase 3-like	--	[K]	Transcription	Conserved hypothetical ATP binding protein	sp|Q6ZM63|GPN3_DANRE GPN-loop GTPase 3 OS=Danio rerio OX=7955 GN=gpn3 PE=2 SV=2	K	Transcription	GPN-loop GTPase 3 isoform X2 [Momordica charantia]
Cla97C02G034910	30321	34342	37562	9433	27809	5669	401.313	296.224	365.284	93.8062	213.982	50.1626	0.000926617	-1.70293	down	[P]	Inorganic ion transport and metabolism	Cellular Component: intrinsic component of membrane (GO:0031224);; Biological Process: establishment of localization (GO:0051234);;	K21398|0|csv:101211711|metal transporter Nramp3	--	[P]	Inorganic ion transport and metabolism	Natural resistance-associated macrophage protein	sp|Q9SNV9|NRAM3_ARATH Metal transporter Nramp3 OS=Arabidopsis thaliana OX=3702 GN=NRAMP3 PE=1 SV=2	P	Inorganic ion transport and metabolism	metal transporter Nramp3-like [Cucumis melo var. makuwa]
Cla97C05G086730	401	1204	1023	229	276	389	6.21454	12.1671	11.6546	2.65863	2.48254	4.03081	7.89e-06	-1.80779	down	--	--	Molecular Function: endopeptidase activity (GO:0004175);; Biological Process: protein metabolic process (GO:0019538);;	--	--	[O]	Posttranslational modification, protein turnover, chaperones	Xylanase inhibitor C-terminal;; Xylanase inhibitor N-terminal	sp|P0DO21|GIP2_NICBE Probable aspartic proteinase GIP2 OS=Nicotiana benthamiana OX=4100 GN=GIP2 PE=1 SV=1	O	Posttranslational modification, protein turnover, chaperones	basic 7S globulin-like [Cucurbita moschata]
Cla97C01G020950	2530	4886	5949	2299	4355	1560	31.1604	39.2221	53.8455	21.2784	31.185	12.8416	0.00956786	-1.05477	down	--	--	Biological Process: transcription, DNA-templated (GO:0006351);;	--	--	--	--	GRAS domain family	sp|Q9M0M5|SCL13_ARATH Scarecrow-like protein 13 OS=Arabidopsis thaliana OX=3702 GN=SCL13 PE=2 SV=2	K	Transcription	scarecrow-like protein 13 [Cucurbita maxima]
[truncated: 1,298 more rows]

## Sheet: Ss 0 d vs. Ss 3 d
#ID	Ss0d1_Count	Ss0d2_Count	Ss0d3_Count	Ss3d1_Count	Ss3d2_Count	Ss3d3_Count	Ss0d1_FPKM	Ss0d2_FPKM	Ss0d3_FPKM	Ss3d1_FPKM	Ss3d2_FPKM	Ss3d3_FPKM	Pvalue	log2FC	regulated	COG_class	COG_class_annotation	GO_annotation	KEGG_annotation	KEGG_pathway_annotation	KOG_class	KOG_class_annotation	Pfam_annotation	Swiss-Prot_annotation	eggNOG_class	eggNOG_class_annotation	NR_annotation
[truncated: 1,705 more rows]

[truncated: 2 more sheets: Rs 0 d vs. Rs 1 d, Rs 0 d vs. Rs 3 d]
