# Supplementary material
Source: MDPI journal article supplement (https://www.mdpi.com/2073-4395/13/3/618)
Supplement: s1 [file s1 › Table S4.xlsx]

## Sheet: sheet1
Table S4. GO analysis of DEGs under salt stress.
GO classification	GO Term	GO.ID	Identified DEGs in Ss 0 d vs. Ss 1 d	Identified DEGs in Ss 0 d vs. Ss 3 d	Identified DEGs in Rs 0 d vs. Rs 1 d	Identified DEGs in Rs 0 d vs. Rs 3 d
cellular component	extracellular region	GO:0005576	Cla97C09G183600 Cla97C09G183890 Cla97C01G007090 Cla97C01G000790 Cla97C02G047600 Cla97C03G053880	Cla97C03G053880 Cla97C09G183600 Cla97C01G000790 Cla97C06G122630 Cla97C01G011840 Cla97C01G000780 Cla97C07G134510	Cla97C05G092720 Cla97C05G107400 Cla97C01G004270 Cla97C09G174320 Cla97C06G122590 Cla97C03G056130 Cla97C09G183890 Cla97C02G047600 Cla97C10G195970 Cla97C09G165720	Cla97C05G107400 Cla97C05G092720 Cla97C07G143650 Cla97C06G122600 Cla97C09G165720 Cla97C03G056130 Cla97C10G192950 Cla97C02G047600 Cla97C10G191800 Cla97C07G134510 Cla97C08G153860 Cla97C10G203180 Cla97C01G011840 Cla97C10G195970 Cla97C06G122590 Cla97C04G077560 Cla97C09G174320 Cla97C09G183830 Cla97C02G027980 Cla97C06G123720
cellular component	cell	GO:0005623	Cla97C02G031860 Cla97C03G053080 Cla97C01G023170 Cla97C01G003110 Cla97C11G206830 Cla97C10G197870 Cla97C11G208430 Cla97C06G123300 Cla97C07G136660 Cla97C06G124750 Cla97C10G205470 Cla97C04G077940 Cla97C02G028260 Cla97C09G174400 Cla97C02G037900 Cla97C05G090570 Cla97C05G083380 Cla97C09G168530 Cla97C10G203520 Cla97C02G043880 Cla97C01G004570 Cla97C01G001810 Cla97C06G114500 Cla97C11G215020 Cla97C10G188740…	Cla97C07G143190 Cla97C09G171410 Cla97C05G102680 Cla97C02G035330 Cla97C08G147960 Cla97C06G116140 Cla97C09G181980 Cla97C07G128830 Cla97C06G127920 Cla97C05G083380 Cla97C01G004570 Cla97C08G152180 Cla97C08G158900 Cla97C01G024350 Cla97C11G215020 Cla97C11G211210 Cla97C02G030340 Cla97C01G015710 Cla97C01G006960 Cla97C10G188640 Cla97C09G164350 Cla97C02G031900 Cla97C04G075820 Cla97C02G045580 Cla97C10G192430…	Cla97C11G212620 Cla97C02G044270 Cla97C05G107400 Cla97C06G114510 Cla97C05G095750 Cla97C06G125140 Cla97C02G039440 Cla97C08G152010 Cla97C10G188970 Cla97C07G134750 Cla97C05G088090 Cla97C11G224820 Cla97C06G122590 Cla97C05G087230 Cla97C01G004300 Cla97C05G106720 Cla97C10G193420 Cla97C04G073900 Cla97C01G023060 Cla97C11G207920 Cla97C05G085160 Cla97C05G106170 Cla97C06G114860 Cla97C05G098160 Cla97C01G004570…	Cla97C02G048090 Cla97C09G163490 Cla97C05G100280 Cla97C06G111610 Cla97C09G162830 Cla97C01G009760 Cla97C04G077540 Cla97C06G117670 Cla97C02G033250 Cla97C01G015900 Cla97C10G204950 Cla97C10G203180 Cla97C09G171260 Cla97C09G170150 Cla97C09G177470 Cla97C09G170160 Cla97C05G083480 Cla97C01G008480 Cla97C04G073920 Cla97C07G137630 Cla97C08G157720 Cla97C03G066580 Cla97C02G026500 Cla97C03G065250 Cla97C09G169960…
cellular component	membrane	GO:0016020	Cla97C06G110030 Cla97C05G092230 Cla97C02G037020 Cla97C03G068310 Cla97C02G044910 Cla97C01G006940 Cla97C10G192430 Cla97C02G029900 Cla97C02G035440 Cla97C02G040800 Cla97C05G093230 Cla97C10G200240 Cla97C11G211300 Cla97C08G158660 Cla97C05G090170 Cla97C03G056230 Cla97C04G076090 Cla97C11G225310 Cla97C01G024920 Cla97C10G204390 Cla97C01G013270 Cla97C03G057170 Cla97C05G102990 Cla97C08G156920 Cla97C05G085230…	Cla97C07G142930 Cla97C11G211210 Cla97C08G145550 Cla97C07G140300 Cla97C03G061860 Cla97C01G012550 Cla97C11G222780 Cla97C04G075740 Cla97C03G057170 Cla97C06G116510 Cla97C07G140310 Cla97C03G063930 Cla97C01G013270 Cla97C04G079110 Cla97C01G024350 Cla97C11G215020 Cla97C08G154650 Cla97C07G142240 Cla97C02G034920 Cla97C06G116370 Cla97C01G016770 Cla97C11G220900 Cla97C07G128830 Cla97C02G032900 Cla97C10G196000…	Cla97C02G032300 Cla97C06G112770 Cla97C11G213360 Cla97C01G017020 Cla97C03G051410 Cla97C03G061620 Cla97C10G186490 Cla97C05G090100 Cla97C03G054140 Cla97C05G087740 Cla97C06G110030 Cla97C03G051490 Cla97C04G074640 Cla97C01G001390 Cla97C02G035420 Cla97C08G148420 Cla97C05G081390 Cla97C02G032180 Cla97C02G034920 Cla97C02G044450 Cla97C11G220020 Cla97C03G055040 Cla97C05G081100 Cla97C03G052500 Cla97C04G073330…	Cla97C06G112670 Cla97C02G037020 Cla97C04G073730 Cla97C02G034450 Cla97C10G206000 Cla97C11G210980 Cla97C03G059260 Cla97C10G202240 Cla97C09G171410 Cla97C02G047180 Cla97C07G141470 Cla97C01G024490 Cla97C01G015310 Cla97C02G038340 Cla97C09G176160 Cla97C01G001600 Cla97C02G033400 Cla97C08G155190 Cla97C09G174420 Cla97C02G026950 Cla97C05G103030 Cla97C03G063110 Cla97C08G149190 Cla97C08G150210 Cla97C10G195680…
cellular component	virion	GO:0019012		Cla97C11G211210		Cla97C11G211210
cellular component	cell junction	GO:0030054	Cla97C09G176160 Cla97C07G141130 Cla97C01G006900 Cla97C10G205620 Cla97C10G198990 Cla97C02G049770 Cla97C00G000110 Cla97C04G079700 Cla97C09G168530	Cla97C09G163930 Cla97C01G006900 Cla97C05G089890 Cla97C09G176160 Cla97C10G193130	Cla97C09G163930 Cla97C11G208800 Cla97C02G049770 Cla97C11G224540 Cla97C05G103020 Cla97C10G205620 Cla97C06G115540 Cla97C05G099500	Cla97C01G006900 Cla97C05G090420 Cla97C09G163930 Cla97C10G193130 Cla97C04G077450 Cla97C09G176160 Cla97C05G089890 Cla97C06G115540 Cla97C05G108940 Cla97C11G208800 Cla97C09G184160 Cla97C03G065250 Cla97C11G224540 Cla97C10G185790
cellular component	membrane-enclosed lumen	GO:0031974	Cla97C11G208930 Cla97C05G088090 Cla97C09G176160 Cla97C10G184990 Cla97C02G026500 Cla97C06G123270	Cla97C02G026500 Cla97C09G176160 Cla97C09G181980	Cla97C11G208930 Cla97C02G026500 Cla97C05G088090 Cla97C08G159900 Cla97C06G123270	Cla97C11G208930 Cla97C08G159900 Cla97C02G026500 Cla97C09G176160 Cla97C09G181980
cellular component	macromolecular complex	GO:0032991	Cla97C05G104830 Cla97C01G010420 Cla97C09G163120 Cla97C11G209130 Cla97C05G104480 Cla97C03G051250 Cla97C10G204020 Cla97C09G182000 Cla97C07G131250 Cla97C06G114500 Cla97C08G152010 Cla97C02G046670 Cla97C05G101350 Cla97C10G192140 Cla97C05G080230 Cla97C11G223220 Cla97C04G075240 Cla97C01G009730 Cla97C05G092200 Cla97C11G214640 Cla97C10G195000 Cla97C07G133120 Cla97C10G198990 Cla97C10G184990 Cla97C08G153410…	Cla97C06G113840 Cla97C11G211210 Cla97C08G152480 Cla97C09G181980 Cla97C09G182000 Cla97C07G143310 Cla97C01G006730 Cla97C10G204020 Cla97C04G075240 Cla97C06G126260 Cla97C11G219570 Cla97C07G134860 Cla97C11G214640 Cla97C02G045580 Cla97C02G039800 Cla97C06G126130 Cla97C03G054880 Cla97C11G224650 Cla97C02G046670 Cla97C01G000170 Cla97C01G014340 Cla97C03G051250 Cla97C11G222720 Cla97C10G204770 Cla97C11G209130…	Cla97C01G010620 Cla97C02G039440 Cla97C08G152010 Cla97C11G209130 Cla97C02G047680 Cla97C05G104480 Cla97C11G220940 Cla97C06G125710 Cla97C07G137460 Cla97C03G056340 Cla97C02G044270 Cla97C11G223270 Cla97C05G096030 Cla97C01G024340 Cla97C01G015370 Cla97C10G192140 Cla97C11G214040 Cla97C06G121870 Cla97C01G023610 Cla97C01G013250 Cla97C06G109810 Cla97C10G204770 Cla97C05G081100 Cla97C10G206310 Cla97C03G065480…	Cla97C03G057610 Cla97C02G033760 Cla97C11G214250 Cla97C05G095370 Cla97C09G181480 Cla97C11G210170 Cla97C07G132780 Cla97C09G181980 Cla97C11G211210 Cla97C02G038330 Cla97C08G157910 Cla97C01G012530 Cla97C05G087750 Cla97C02G031670 Cla97C01G008480 Cla97C05G092510 Cla97C11G219180 Cla97C04G071060 Cla97C02G039800 Cla97C01G000170 Cla97C08G159330 Cla97C06G113840 Cla97C11G209130 Cla97C01G013250 Cla97C00G000070…
cellular component	organelle	GO:0043226	Cla97C09G182000 Cla97C07G130890 Cla97C08G148560 Cla97C01G019560 Cla97C07G137550 Cla97C10G185910 Cla97C06G111690 Cla97C01G007770 Cla97C01G017950 Cla97C02G030340 Cla97C10G204380 Cla97C01G016070 Cla97C09G163120 Cla97C02G031180 Cla97C07G133330 Cla97C08G152080 Cla97C07G140210 Cla97C06G114150 Cla97C09G171450 Cla97C11G221510 Cla97C07G142150 Cla97C02G026500 Cla97C02G043390 Cla97C09G165790 Cla97C01G020810…	Cla97C07G132630 Cla97C03G063620 Cla97C01G000170 Cla97C07G140210 Cla97C07G135480 Cla97C09G178930 Cla97C11G221510 Cla97C08G160780 Cla97C04G075570 Cla97C06G125140 Cla97C07G136330 Cla97C06G114580 Cla97C08G148560 Cla97C01G002130 Cla97C01G012830 Cla97C05G097410 Cla97C02G028550 Cla97C07G128860 Cla97C01G021210 Cla97C09G164500 Cla97C11G219830 Cla97C11G222260 Cla97C05G081370 Cla97C05G090570 Cla97C07G138340…	Cla97C06G121920 Cla97C11G220940 Cla97C11G208900 Cla97C01G024340 Cla97C03G054370 Cla97C01G015370 Cla97C06G118020 Cla97C06G125640 Cla97C10G205400 Cla97C01G010620 Cla97C04G079030 Cla97C11G212570 Cla97C02G047680 Cla97C10G204770 Cla97C08G154530 Cla97C03G064170 Cla97C11G212320 Cla97C02G048510 Cla97C02G042950 Cla97C02G037920 Cla97C10G204200 Cla97C10G206310 Cla97C05G089140 Cla97C09G176240 Cla97C05G080310…	Cla97C10G194200 Cla97C03G064170 Cla97C10G203780 Cla97C03G059320 Cla97C09G166470 Cla97C04G075430 Cla97C01G011870 Cla97C11G208240 Cla97C01G005910 Cla97C09G176160 Cla97C02G038340 Cla97C08G157910 Cla97C11G224630 Cla97C01G023300 Cla97C08G147960 Cla97C08G155190 Cla97C03G060720 Cla97C02G031670 Cla97C02G028260 Cla97C11G224820 Cla97C07G128310 Cla97C10G198060 Cla97C09G171450 Cla97C09G163980 Cla97C00G000070…
cellular component	extracellular region part	GO:0044421	Cla97C01G000790	Cla97C01G000780 Cla97C01G000790		Cla97C08G153860
cellular component	organelle part	GO:0044422	Cla97C10G185910 Cla97C01G014980 Cla97C01G004300 Cla97C06G114500 Cla97C01G019560 Cla97C11G215020 Cla97C09G182000 Cla97C11G209470 Cla97C01G010420 Cla97C05G084720 Cla97C05G104480 Cla97C01G015590 Cla97C02G032260 Cla97C09G167530 Cla97C06G125510 Cla97C06G123270 Cla97C11G207970 Cla97C02G026500 Cla97C02G035330 Cla97C03G066040 Cla97C11G214640 Cla97C11G221510 Cla97C07G141130 Cla97C11G221010 Cla97C09G171450…	Cla97C09G181980 Cla97C06G127920 Cla97C09G176160 Cla97C02G043280 Cla97C02G041730 Cla97C09G163930 Cla97C08G154850 Cla97C06G127440 Cla97C08G157590 Cla97C09G171410 Cla97C02G050670 Cla97C02G035330 Cla97C09G166690 Cla97C11G211210 Cla97C10G202000 Cla97C01G008920 Cla97C10G203780 Cla97C11G206880 Cla97C09G169230 Cla97C09G183270 Cla97C02G046350 Cla97C11G215020 Cla97C08G147470 Cla97C11G223140 Cla97C01G005440…	Cla97C05G095750 Cla97C03G063460 Cla97C01G001390 Cla97C02G044270 Cla97C11G209610 Cla97C01G004300 Cla97C06G123270 Cla97C05G088090 Cla97C05G096440 Cla97C11G223230 Cla97C01G018080 Cla97C10G189870 Cla97C06G119610 Cla97C06G114860 Cla97C11G208930 Cla97C02G047990 Cla97C04G073900 Cla97C07G137540 Cla97C05G101820 Cla97C10G205320 Cla97C09G183220 Cla97C09G165790 Cla97C08G146000 Cla97C01G024330 Cla97C05G099770…	Cla97C11G206880 Cla97C07G128370 Cla97C08G147440 Cla97C11G223140 Cla97C09G163930 Cla97C09G181980 Cla97C09G183220 Cla97C09G182390 Cla97C04G071060 Cla97C01G005630 Cla97C11G220240 Cla97C01G001390 Cla97C06G118020 Cla97C11G212700 Cla97C02G026500 Cla97C05G103050 Cla97C01G011860 Cla97C01G008480 Cla97C10G188750 Cla97C05G084720 Cla97C02G046350 Cla97C11G211210 Cla97C02G049550 Cla97C07G128860 Cla97C08G159900…
cellular component	virion part	GO:0044423		Cla97C11G211210		Cla97C11G211210
cellular component	membrane part	GO:0044425	Cla97C06G111120 Cla97C09G174030 Cla97C03G052420 Cla97C05G094810 Cla97C03G063920 Cla97C07G139720 Cla97C08G161680 Cla97C09G181250 Cla97C08G154800 Cla97C05G087800 Cla97C02G032930 Cla97C11G222450 Cla97C03G053800 Cla97C05G104600 Cla97C03G066430 Cla97C11G220060 Cla97C07G142920 Cla97C10G205240 Cla97C02G044840 Cla97C10G194540 Cla97C11G218420 Cla97C11G213580 Cla97C01G016290 Cla97C08G146010 Cla97C01G000230…	Cla97C08G154850 Cla97C09G163930 Cla97C01G008910 Cla97C01G016310 Cla97C11G222390 Cla97C05G108050 Cla97C07G143370 Cla97C10G201410 Cla97C08G146680 Cla97C08G156920 Cla97C10G191340 Cla97C06G127440 Cla97C05G107230 Cla97C04G077770 Cla97C01G003780 Cla97C06G112850 Cla97C01G019400 Cla97C02G037390 Cla97C09G169620 Cla97C01G006110 Cla97C11G223450 Cla97C08G152080 Cla97C08G148710 Cla97C04G074330 Cla97C05G094810…	Cla97C06G113090 Cla97C03G054780 Cla97C00G000140 Cla97C06G124070 Cla97C08G155460 Cla97C03G056340 Cla97C11G220060 Cla97C05G081290 Cla97C06G112760 Cla97C05G106320 Cla97C10G187810 Cla97C09G168520 Cla97C05G101010 Cla97C06G128060 Cla97C03G063270 Cla97C05G085820 Cla97C02G049160 Cla97C07G143960 Cla97C04G069070 Cla97C03G060050 Cla97C09G171710 Cla97C09G175000 Cla97C06G122990 Cla97C01G014630 Cla97C05G087110…	Cla97C10G199280 Cla97C05G102840 Cla97C10G188630 Cla97C10G205230 Cla97C01G026160 Cla97C05G099700 Cla97C05G087270 Cla97C07G139720 Cla97C10G202670 Cla97C01G023160 Cla97C11G220090 Cla97C09G163530 Cla97C06G115060 Cla97C03G053160 Cla97C06G124080 Cla97C09G163930 Cla97C07G139190 Cla97C11G213400 Cla97C06G125050 Cla97C11G219160 Cla97C02G036040 Cla97C11G211180 Cla97C03G054780 Cla97C06G114480 Cla97C11G222110…
cellular component	cell part	GO:0044464	Cla97C07G143030 Cla97C09G166690 Cla97C06G117070 Cla97C02G031890 Cla97C03G067000 Cla97C11G208900 Cla97C02G031910 Cla97C03G063620 Cla97C08G156620 Cla97C01G008630 Cla97C02G040810 Cla97C02G031380 Cla97C10G198990 Cla97C04G075140 Cla97C10G204760 Cla97C02G036810 Cla97C06G126270 Cla97C09G182060 Cla97C01G006550 Cla97C02G035330 Cla97C10G200240 Cla97C08G160780 Cla97C10G192430 Cla97C05G084720 Cla97C07G144520…	Cla97C02G049190 Cla97C10G194210 Cla97C02G039490 Cla97C02G048380 Cla97C11G223140 Cla97C06G115410 Cla97C09G179000 Cla97C11G209130 Cla97C10G204770 Cla97C11G212710 Cla97C08G154860 Cla97C10G190260 Cla97C08G159530 Cla97C09G175620 Cla97C11G214640 Cla97C11G222680 Cla97C05G107680 Cla97C06G110200 Cla97C02G048420 Cla97C08G152480 Cla97C11G224920 Cla97C04G079530 Cla97C02G034250 Cla97C10G198060 Cla97C08G149890…	Cla97C02G037920 Cla97C03G064170 Cla97C11G212320 Cla97C06G109810 Cla97C02G042950 Cla97C05G089140 Cla97C09G176240 Cla97C06G118020 Cla97C06G121920 Cla97C11G223270 Cla97C11G208900 Cla97C02G047680 Cla97C01G007850 Cla97C11G212570 Cla97C04G079030 Cla97C01G010620 Cla97C10G196770 Cla97C09G168010 Cla97C05G080020 Cla97C11G223990 Cla97C03G062790 Cla97C07G135480 Cla97C02G031880 Cla97C08G153410 Cla97C10G185200…	Cla97C08G150640 Cla97C03G051540 Cla97C02G046310 Cla97C10G188970 Cla97C02G035010 Cla97C06G111640 Cla97C02G036850 Cla97C01G015710 Cla97C06G116070 Cla97C05G080370 Cla97C01G008920 Cla97C01G021210 Cla97C02G047600 Cla97C08G157820 Cla97C01G015680 Cla97C03G066430 Cla97C08G159740 Cla97C09G166700 Cla97C10G205340 Cla97C01G005440 Cla97C11G224920 Cla97C04G071410 Cla97C09G178670 Cla97C09G173500 Cla97C02G032530…
cellular component	supramolecular complex	GO:0099080			Cla97C05G101820	Cla97C05G101820
molecular function	nucleic acid binding transcription factor activity	GO: 0001071	Cla97C08G160780 Cla97C07G141890 Cla97C05G089920 Cla97C01G017950 Cla97C05G085960 Cla97C03G062800 Cla97C07G133580 Cla97C01G016070 Cla97C10G194390 Cla97C07G138080 Cla97C07G130890 Cla97C08G157010 Cla97C01G004570 Cla97C08G159750 Cla97C02G031420 Cla97C06G118270 Cla97C05G101750 Cla97C09G172330 Cla97C05G106570 Cla97C11G208930 Cla97C07G135040 Cla97C10G205470 Cla97C08G152780 Cla97C11G225230 Cla97C10G198640…	Cla97C08G157120 Cla97C09G167560 Cla97C06G121480 Cla97C05G081370 Cla97C05G081140 Cla97C05G104890 Cla97C07G141890 Cla97C05G085160 Cla97C08G160780 Cla97C05G088270 Cla97C09G163890 Cla97C03G050940 Cla97C07G135040 Cla97C09G172330 Cla97C01G002130 Cla97C02G034700 Cla97C07G130380 Cla97C10G206240 Cla97C07G130950 Cla97C06G126260 Cla97C06G116550 Cla97C01G007760 Cla97C11G212900 Cla97C10G187080 Cla97C06G123330…	Cla97C05G081310 Cla97C01G014800 Cla97C08G157020 Cla97C02G037900 Cla97C02G037920 Cla97C05G080560 Cla97C10G205870 Cla97C05G089730 Cla97C03G059320 Cla97C06G116550 Cla97C05G080310 Cla97C09G163710 Cla97C07G141890 Cla97C05G095150 Cla97C01G005910 Cla97C11G208900 Cla97C07G135040 Cla97C05G081570 Cla97C07G128790 Cla97C05G080370 Cla97C08G160780 Cla97C10G187080 Cla97C05G080020 Cla97C05G088270 Cla97C09G167380…	Cla97C05G081370 Cla97C06G111000 Cla97C11G208900 Cla97C07G135040 Cla97C09G163370 Cla97C05G090940 Cla97C08G150290 Cla97C11G208930 Cla97C07G144030 Cla97C10G202460 Cla97C08G159650 Cla97C05G080560 Cla97C02G028610 Cla97C05G106550 Cla97C11G225230 Cla97C10G205870 Cla97C02G032990 Cla97C02G039460 Cla97C06G117530 Cla97C01G015900 Cla97C07G130890 Cla97C05G081310 Cla97C07G141890 Cla97C07G135710 Cla97C04G075590…
molecular function	catalytic activity	GO:0003824	Cla97C02G048430 Cla97C04G078470 Cla97C05G096790 Cla97C05G084420 Cla97C07G132580 Cla97C05G103740 Cla97C08G158360 Cla97C02G042980 Cla97C07G144010 Cla97C01G007450 Cla97C06G127300 Cla97C04G076390 Cla97C01G009730 Cla97C07G141130 Cla97C07G132170 Cla97C07G139470 Cla97C08G152170 Cla97C05G100820 Cla97C02G032700 Cla97C03G054370 Cla97C07G142940 Cla97C11G219480 Cla97C03G054690 Cla97C07G130850 Cla97C04G073560…	Cla97C03G056430 Cla97C07G130850 Cla97C02G028550 Cla97C02G034580 Cla97C05G081710 Cla97C11G217200 Cla97C10G204390 Cla97C07G136260 Cla97C11G221510 Cla97C02G050510 Cla97C11G221870 Cla97C04G069670 Cla97C03G060860 Cla97C10G196110 Cla97C11G208030 Cla97C10G193050 Cla97C08G151630 Cla97C07G136350 Cla97C03G058600 Cla97C06G122630 Cla97C09G173500 Cla97C01G006830 Cla97C10G202930 Cla97C09G183600 Cla97C10G193800…	Cla97C09G174450 Cla97C01G004990 Cla97C07G136120 Cla97C11G213800 Cla97C04G074750 Cla97C04G071040 Cla97C02G034930 Cla97C01G016100 Cla97C03G052090 Cla97C08G152170 Cla97C11G218210 Cla97C05G097410 Cla97C01G025370 Cla97C02G043280 Cla97C05G099020 Cla97C01G019450 Cla97C06G109850 Cla97C06G126870 Cla97C10G197000 Cla97C05G101490 Cla97C05G097040 Cla97C03G057690 Cla97C10G194470 Cla97C10G188890 Cla97C01G015110…	Cla97C07G141310 Cla97C01G008270 Cla97C07G142250 Cla97C07G129800 Cla97C06G123790 Cla97C06G126880 Cla97C03G057000 Cla97C05G090420 Cla97C06G118700 Cla97C08G153880 Cla97C10G185860 Cla97C09G165590 Cla97C10G203340 Cla97C07G135590 Cla97C05G088420 Cla97C10G196950 Cla97C02G046650 Cla97C06G123590 Cla97C10G198410 Cla97C05G092720 Cla97C02G050410 Cla97C05G093500 Cla97C01G003780 Cla97C02G030460 Cla97C09G166100…
molecular function	structural molecule activity	GO:0005198	Cla97C10G198990 Cla97C10G197870 Cla97C05G092200 Cla97C07G140790 Cla97C09G176160 Cla97C10G199560 Cla97C05G097520 Cla97C10G192140 Cla97C11G223220 Cla97C10G195000 Cla97C05G104480	Cla97C06G113840 Cla97C01G000170 Cla97C09G176160 Cla97C11G222720 Cla97C10G193030 Cla97C10G195000	Cla97C10G204950 Cla97C06G109810 Cla97C10G190280 Cla97C10G196930 Cla97C09G164070 Cla97C10G206310 Cla97C06G121870 Cla97C09G180520 Cla97C11G214040 Cla97C10G192140 Cla97C03G062790 Cla97C01G017210 Cla97C01G023610 Cla97C11G223270 Cla97C05G104480 Cla97C11G220940 Cla97C03G059560 Cla97C08G157820 Cla97C02G047680 Cla97C11G223230 Cla97C10G193030	Cla97C01G000170 Cla97C03G059560 Cla97C06G113840 Cla97C10G204950 Cla97C10G193030 Cla97C10G197870 Cla97C00G000070 Cla97C02G050600 Cla97C01G017210 Cla97C03G057610 Cla97C09G176160 Cla97C02G038330 Cla97C10G196230 Cla97C09G181480 Cla97C01G002830 Cla97C08G157820 Cla97C11G219180 Cla97C03G062790 Cla97C04G073920
molecular function	transporter activity	GO:0005215	Cla97C01G008490 Cla97C01G012190 Cla97C01G020150 Cla97C09G168730 Cla97C07G139690 Cla97C07G143890 Cla97C06G119980 Cla97C03G056800 Cla97C07G143900 Cla97C03G066270 Cla97C10G194540 Cla97C04G078520 Cla97C05G091050 Cla97C03G066430 Cla97C06G118770 Cla97C03G060170 Cla97C07G134820 Cla97C08G161680 Cla97C09G182640 Cla97C05G085120 Cla97C07G139720 Cla97C08G160730 Cla97C01G000270 Cla97C07G134810 Cla97C02G031380…	Cla97C07G142240 Cla97C03G066430 Cla97C07G143890 Cla97C02G032220 Cla97C02G040800 Cla97C01G016770 Cla97C03G060170 Cla97C05G081060 Cla97C03G054950 Cla97C03G066400 Cla97C10G197270 Cla97C02G032180 Cla97C06G116610 Cla97C11G225110 Cla97C08G152480 Cla97C02G049330 Cla97C03G056800 Cla97C01G000880 Cla97C06G118530 Cla97C11G222780 Cla97C04G075740 Cla97C08G154380 Cla97C05G092270 Cla97C11G216570 Cla97C06G117230…	Cla97C09G168520 Cla97C05G092270 Cla97C10G191060 Cla97C01G010680 Cla97C07G134820 Cla97C06G115540 Cla97C02G032180 Cla97C02G044450 Cla97C02G032200 Cla97C01G004300 Cla97C09G173070 Cla97C06G124070 Cla97C00G000140 Cla97C06G121270 Cla97C09G180000 Cla97C06G119980 Cla97C04G074190 Cla97C09G163930 Cla97C05G103160 Cla97C04G075150 Cla97C06G123400 Cla97C02G028330 Cla97C09G181590 Cla97C09G179710 Cla97C05G081060…	Cla97C06G120940 Cla97C03G056800 Cla97C11G211300 Cla97C06G117720 Cla97C03G066430 Cla97C11G220920 Cla97C01G004300 Cla97C04G074190 Cla97C01G014630 Cla97C09G178110 Cla97C02G032160 Cla97C11G207610 Cla97C09G166470 Cla97C02G028310 Cla97C11G208240 Cla97C05G083260 Cla97C01G022390 Cla97C05G081060 Cla97C01G025090 Cla97C10G190690 Cla97C10G194540 Cla97C09G164640 Cla97C01G017890 Cla97C01G025050 Cla97C02G044450…
molecular function	binding	GO:0005488	Cla97C02G047040 Cla97C02G035770 Cla97C02G048380 Cla97C05G100130 Cla97C05G103070 Cla97C11G221460 Cla97C03G062120 Cla97C09G163710 Cla97C05G107510 Cla97C08G153700 Cla97C10G195600 Cla97C08G148820 Cla97C06G112420 Cla97C01G017520 Cla97C09G163050 Cla97C01G019290 Cla97C01G021640 Cla97C11G225230 Cla97C03G067100 Cla97C10G188020 Cla97C08G152900 Cla97C08G155700 Cla97C09G177410 Cla97C08G159700 Cla97C03G054660…	Cla97C09G179230 Cla97C05G085640 Cla97C08G152180 Cla97C01G012980 Cla97C05G083380 Cla97C06G127920 Cla97C01G005420 Cla97C05G101000 Cla97C11G207800 Cla97C03G058580 Cla97C08G159380 Cla97C03G051420 Cla97C08G158900 Cla97C09G172570 Cla97C01G014990 Cla97C05G103160 Cla97C03G057690 Cla97C01G016910 Cla97C11G223100 Cla97C04G070210 Cla97C11G219870 Cla97C07G143190 Cla97C08G147960 Cla97C01G024110 Cla97C02G042370…	Cla97C09G179450 Cla97C07G133650 Cla97C09G167710 Cla97C09G167380 Cla97C09G180380 Cla97C01G008230 Cla97C07G140340 Cla97C05G085320 Cla97C03G064220 Cla97C09G163570 Cla97C09G163520 Cla97C11G216060 Cla97C06G122990 Cla97C03G065080 Cla97C06G124730 Cla97C08G148950 Cla97C01G008870 Cla97C05G091900 Cla97C05G101010 Cla97C03G058120 Cla97C09G168520 Cla97C08G151090 Cla97C06G119170 Cla97C10G205630 Cla97C05G095150…	Cla97C11G211920 Cla97C02G048500 Cla97C06G111640 Cla97C02G035010 Cla97C10G188970 Cla97C06G114980 Cla97C02G045830 Cla97C05G085770 Cla97C01G015710 Cla97C08G159690 Cla97C03G065350 Cla97C10G199500 Cla97C06G112600 Cla97C01G011610 Cla97C08G159440 Cla97C09G164440 Cla97C09G166700 Cla97C05G095150 Cla97C01G002150 Cla97C05G099630 Cla97C01G005440 Cla97C10G188210 Cla97C10G190310 Cla97C03G054790 Cla97C05G100850…
molecular function	electron carrier activity	GO:0009055	Cla97C11G218510	Cla97C05G086670 Cla97C11G218510	Cla97C02G027850
molecular function	antioxidant activity	GO:0016209	Cla97C02G049920 Cla97C09G184240 Cla97C09G177290 Cla97C02G049890 Cla97C02G049950 Cla97C11G214530 Cla97C01G002890 Cla97C02G049930	Cla97C01G016570 Cla97C05G088420 Cla97C05G097140 Cla97C08G152180 Cla97C11G224830 Cla97C09G177290 Cla97C01G002890 Cla97C10G195960 Cla97C02G049920 Cla97C03G067430 Cla97C02G049930 Cla97C02G049890 Cla97C04G070210 Cla97C04G071940 Cla97C02G049940 Cla97C02G049950	Cla97C04G070210 Cla97C11G220240 Cla97C02G045070 Cla97C02G049890 Cla97C09G177290 Cla97C09G180150 Cla97C05G088420 Cla97C02G047680 Cla97C09G177060	Cla97C03G067430 Cla97C02G049940 Cla97C09G178920 Cla97C11G224830 Cla97C05G097140 Cla97C11G206420 Cla97C05G088420 Cla97C03G059200 Cla97C09G184240 Cla97C01G020000 Cla97C03G055890 Cla97C01G019890 Cla97C07G144420 Cla97C02G049930 Cla97C02G049920 Cla97C10G203590 Cla97C11G220240 Cla97C08G152180 Cla97C09G177060 Cla97C09G180150 Cla97C04G070210 Cla97C07G128300 Cla97C01G016570
molecular function	molecular transducer activity	GO:0060089	Cla97C08G151850	Cla97C11G223720 Cla97C11G217310	Cla97C09G169340 Cla97C01G007030	Cla97C11G223720 Cla97C02G035160
molecular function	molecular function regulator	GO:0098772	Cla97C01G012860 Cla97C03G061920 Cla97C07G141130 Cla97C09G168010 Cla97C05G107750 Cla97C10G200540 Cla97C05G085470 Cla97C01G006690	Cla97C04G079400 Cla97C06G110110 Cla97C04G077120 Cla97C09G168010 Cla97C05G085470 Cla97C05G089170 Cla97C01G006690	Cla97C09G163490 Cla97C05G089170 Cla97C02G026860 Cla97C09G168010 Cla97C01G012860 Cla97C02G026840 Cla97C07G141120 Cla97C09G171500 Cla97C10G200540 Cla97C07G129510 Cla97C03G065030 Cla97C09G167230 Cla97C04G077120 Cla97C02G036850 Cla97C03G067560 Cla97C05G087810	Cla97C01G000480 Cla97C04G074310 Cla97C05G089170 Cla97C11G213480 Cla97C01G003890 Cla97C02G026860 Cla97C03G067530 Cla97C05G087810 Cla97C09G171500 Cla97C01G006690 Cla97C01G012860 Cla97C09G168010 Cla97C09G163490 Cla97C06G113140 Cla97C01G003370 Cla97C09G184270 Cla97C03G067560 Cla97C02G026840 Cla97C03G065030 Cla97C02G036850 Cla97C10G189900
biological process	reproduction	GO:0000003	Cla97C09G167720 Cla97C11G209370 Cla97C01G022990 Cla97C01G021180 Cla97C01G025950 Cla97C07G128310 Cla97C01G019400 Cla97C01G001550 Cla97C02G028260	Cla97C09G167720 Cla97C09G173910 Cla97C01G019400 Cla97C01G021180 Cla97C10G188640 Cla97C07G128310 Cla97C07G132630 Cla97C07G142250	Cla97C06G122130 Cla97C02G036850 Cla97C09G169250 Cla97C07G128310 Cla97C02G028260 Cla97C11G208800 Cla97C05G106120	Cla97C01G026160 Cla97C08G150060 Cla97C11G208800 Cla97C05G106120 Cla97C02G028260 Cla97C10G188640 Cla97C06G125180 Cla97C04G077450 Cla97C06G122130 Cla97C01G001550 Cla97C06G120060 Cla97C11G223010 Cla97C09G169250 Cla97C05G096750 Cla97C07G131380 Cla97C07G132630 Cla97C07G142250 Cla97C09G171260 Cla97C01G017250 Cla97C07G128310 Cla97C10G191650 Cla97C02G036850
biological process	cell killing	GO:0001906	Cla97C01G007340 Cla97C01G007350	Cla97C01G007340	Cla97C01G007340 Cla97C02G026360	Cla97C01G007350 Cla97C02G026360
biological process	immune system process	GO:0002376		Cla97C01G023960 Cla97C09G171610	Cla97C05G081210
biological process	metabolic process	GO:0008152	Cla97C05G089920 Cla97C01G024530 Cla97C05G105510 Cla97C10G188740 Cla97C01G004570 Cla97C04G071760 Cla97C10G190590 Cla97C06G120960 Cla97C02G045450 Cla97C04G072360 Cla97C10G196770 Cla97C01G006910 Cla97C11G223950 Cla97C09G184240 Cla97C10G204580 Cla97C07G143870 Cla97C08G154220 Cla97C01G004850 Cla97C02G043180 Cla97C06G123300 Cla97C04G073230 Cla97C11G206830 Cla97C03G056280 Cla97C05G085450 Cla97C11G221090…	Cla97C07G135500 Cla97C11G219830 Cla97C11G222260 Cla97C01G018640 Cla97C07G136330 Cla97C06G125140 Cla97C02G046650 Cla97C02G049640 Cla97C03G054290 Cla97C08G160780 Cla97C05G086740 Cla97C03G054270 Cla97C02G043180 Cla97C08G158740 Cla97C06G122210 Cla97C05G086730 Cla97C11G223580 Cla97C11G211200 Cla97C04G078470 Cla97C06G127030 Cla97C03G057250 Cla97C01G020280 Cla97C08G151530 Cla97C10G195960 Cla97C01G007760…	Cla97C01G024340 Cla97C03G054370 Cla97C09G166100 Cla97C11G220940 Cla97C02G027910 Cla97C01G024630 Cla97C08G157620 Cla97C10G196030 Cla97C10G206310 Cla97C11G218690 Cla97C02G048510 Cla97C05G080310 Cla97C02G045330 Cla97C10G196950 Cla97C01G002000 Cla97C10G201500 Cla97C09G181160 Cla97C05G104080 Cla97C10G193770 Cla97C05G086380 Cla97C02G046130 Cla97C11G225310 Cla97C10G197810 Cla97C01G000180 Cla97C05G091060…	Cla97C04G078470 Cla97C05G085380 Cla97C07G131150 Cla97C02G043210 Cla97C03G064990 Cla97C03G056130 Cla97C02G026220 Cla97C06G127890 Cla97C06G116470 Cla97C01G000540 Cla97C05G091890 Cla97C01G004570 Cla97C08G160120 Cla97C03G057470 Cla97C05G102910 Cla97C09G165720 Cla97C07G136610 Cla97C11G223140 Cla97C05G087360 Cla97C10G205470 Cla97C01G012300 Cla97C06G119810 Cla97C05G081630 Cla97C09G177060 Cla97C01G016710…
biological process	cellular process	GO:0009987	Cla97C10G187450 Cla97C09G162530 Cla97C02G046130 Cla97C06G124800 Cla97C03G060540 Cla97C10G190270 Cla97C06G117370 Cla97C10G201220 Cla97C07G133330 Cla97C08G158200 Cla97C07G130890 Cla97C02G039490 Cla97C05G098720 Cla97C11G210920 Cla97C01G006710 Cla97C09G182640 Cla97C02G049120 Cla97C06G115150 Cla97C01G016280 Cla97C09G175380 Cla97C03G067620 Cla97C05G091070 Cla97C11G221590 Cla97C10G188380 Cla97C01G019720…	Cla97C09G178320 Cla97C02G049890 Cla97C10G193030 Cla97C08G155260 Cla97C07G133790 Cla97C11G211900 Cla97C09G180810 Cla97C01G009490 Cla97C08G145700 Cla97C03G063920 Cla97C04G071940 Cla97C01G013090 Cla97C05G089090 Cla97C06G121490 Cla97C02G036540 Cla97C01G018420 Cla97C09G167560 Cla97C07G132640 Cla97C01G014770 Cla97C01G006480 Cla97C03G052210 Cla97C07G135710 Cla97C02G035400 Cla97C04G078950 Cla97C08G152780…	Cla97C05G089920 Cla97C09G182070 Cla97C03G057250 Cla97C02G049250 Cla97C04G073760 Cla97C08G158730 Cla97C07G139470 Cla97C02G037330 Cla97C05G084000 Cla97C02G035140 Cla97C07G136660 Cla97C05G100180 Cla97C01G004020 Cla97C10G188950 Cla97C09G179380 Cla97C10G204950 Cla97C09G170230 Cla97C02G030040 Cla97C02G026840 Cla97C09G167000 Cla97C05G093680 Cla97C05G104530 Cla97C10G193030 Cla97C08G160480 Cla97C04G075640…	Cla97C02G038470 Cla97C01G019550 Cla97C01G016030 Cla97C05G085700 Cla97C10G187110 Cla97C01G000140 Cla97C11G221890 Cla97C05G096090 Cla97C07G143650 Cla97C02G031130 Cla97C09G184240 Cla97C10G201270 Cla97C04G074640 Cla97C09G180150 Cla97C10G205870 Cla97C10G201690 Cla97C07G142990 Cla97C02G045580 Cla97C07G136380 Cla97C06G110030 Cla97C04G078560 Cla97C07G134850 Cla97C05G090990 Cla97C10G185670 Cla97C00G000120…
biological process	reproductive process	GO:0022414	Cla97C02G028260 Cla97C01G019400 Cla97C07G128310 Cla97C01G025950 Cla97C01G021180 Cla97C01G022990 Cla97C09G167720 Cla97C11G209370	Cla97C01G021180 Cla97C01G019400 Cla97C07G142250 Cla97C10G188640 Cla97C07G128310 Cla97C07G132630 Cla97C09G167720 Cla97C09G173910	Cla97C06G122130 Cla97C07G128310 Cla97C02G036850 Cla97C09G169250 Cla97C11G208800 Cla97C05G106120 Cla97C02G028260	Cla97C05G106120 Cla97C11G208800 Cla97C02G028260 Cla97C10G188640 Cla97C01G026160 Cla97C08G150060 Cla97C06G120060 Cla97C04G077450 Cla97C06G125180 Cla97C06G122130 Cla97C05G096750 Cla97C11G223010 Cla97C09G169250 Cla97C02G036850 Cla97C01G017250 Cla97C07G132630 Cla97C07G142250 Cla97C09G171260 Cla97C07G128310 Cla97C10G191650
biological process	biological adhesion	GO:0022610				Cla97C05G096750
biological process	signaling	GO:0023052	Cla97C09G167240 Cla97C07G128310 Cla97C02G036250 Cla97C08G148550 Cla97C02G045860 Cla97C11G218140 Cla97C09G181250 Cla97C04G075140 Cla97C03G053080 Cla97C03G053010 Cla97C09G179130 Cla97C06G117070 Cla97C06G112840 Cla97C02G036540 Cla97C04G077940 Cla97C02G047040 Cla97C06G120580 Cla97C01G018680 Cla97C11G218290 Cla97C06G123840 Cla97C01G009380 Cla97C06G116140 Cla97C09G170150 Cla97C11G209130 Cla97C05G085710…	Cla97C09G164500 Cla97C11G223720 Cla97C09G181250 Cla97C11G217310 Cla97C02G036540 Cla97C11G218140 Cla97C02G042980 Cla97C11G223740 Cla97C10G195310 Cla97C07G132630 Cla97C02G046360 Cla97C11G215520 Cla97C04G077940 Cla97C01G007450 Cla97C05G100280 Cla97C04G077280 Cla97C02G035140 Cla97C08G155240 Cla97C10G195960 Cla97C03G058730 Cla97C08G161780 Cla97C07G128830 Cla97C06G120580 Cla97C09G181300 Cla97C01G023290…	Cla97C01G016210 Cla97C08G148550 Cla97C02G035140 Cla97C09G179310 Cla97C05G085710 Cla97C05G085820 Cla97C01G007030 Cla97C07G128310 Cla97C02G037530 Cla97C02G033250 Cla97C10G185200 Cla97C11G208770 Cla97C11G208930 Cla97C09G169250 Cla97C11G217020 Cla97C11G221050 Cla97C02G036250 Cla97C09G162090 Cla97C01G018680 Cla97C07G140130 Cla97C11G209130 Cla97C05G085700 Cla97C06G123840 Cla97C01G007850 Cla97C08G150640	Cla97C01G007850 Cla97C02G033250 Cla97C09G184270 Cla97C05G081670 Cla97C09G163980 Cla97C07G128310 Cla97C09G170150 Cla97C06G110400 Cla97C10G185200 Cla97C02G042420 Cla97C01G006350 Cla97C05G100280 Cla97C04G077540 Cla97C11G223720 Cla97C09G169250 Cla97C10G197710 Cla97C07G129680 Cla97C01G012090 Cla97C04G077450 Cla97C11G208930 Cla97C07G140130 Cla97C05G085700 Cla97C01G016210 Cla97C02G035140 Cla97C09G170160…
biological process	multicellular organismal process	GO:0032501	Cla97C06G123270 Cla97C11G209140 Cla97C01G006900 Cla97C01G003950 Cla97C11G217020 Cla97C01G019400 Cla97C10G187080 Cla97C01G008060 Cla97C09G171250 Cla97C02G037920 Cla97C01G022990 Cla97C05G109000 Cla97C05G093120 Cla97C08G157140 Cla97C10G195120 Cla97C06G122210 Cla97C01G001550 Cla97C09G176160 Cla97C02G031180 Cla97C01G016070 Cla97C10G198640 Cla97C07G128310 Cla97C11G219500 Cla97C10G204380 Cla97C11G209370…	Cla97C07G132630 Cla97C07G128310 Cla97C05G093570 Cla97C05G102680 Cla97C06G122210 Cla97C01G019400 Cla97C02G039460 Cla97C05G104620 Cla97C06G121490 Cla97C09G167720 Cla97C01G006900 Cla97C01G016710 Cla97C10G187080 Cla97C07G142250 Cla97C08G157140 Cla97C07G130380 Cla97C01G005440 Cla97C09G176160 Cla97C11G217310 Cla97C07G128830 Cla97C09G179520	Cla97C06G122130 Cla97C10G187080 Cla97C11G208800 Cla97C02G037920 Cla97C07G128310 Cla97C06G123270 Cla97C05G099260 Cla97C05G085820 Cla97C05G106120 Cla97C01G007030 Cla97C02G042800 Cla97C02G036850 Cla97C09G171250 Cla97C11G217020 Cla97C10G187530 Cla97C08G157140 Cla97C11G209140	Cla97C02G050380 Cla97C07G143650 Cla97C06G122130 Cla97C10G204380 Cla97C04G077450 Cla97C05G106120 Cla97C11G208800 Cla97C07G137630 Cla97C11G220140 Cla97C10G191650 Cla97C06G110400 Cla97C07G128310 Cla97C02G049410 Cla97C05G096750 Cla97C11G219500 Cla97C10G197710 Cla97C02G029640 Cla97C02G039460 Cla97C01G005440 Cla97C01G006900 Cla97C01G001550 Cla97C08G159740 Cla97C06G125180 Cla97C09G176160 Cla97C05G093570…
biological process	developmental process	GO:0032502	Cla97C06G122210 Cla97C01G001550 Cla97C09G176160 Cla97C08G157140 Cla97C10G195120 Cla97C10G205620 Cla97C11G209370 Cla97C09G167720 Cla97C02G031180 Cla97C01G025950 Cla97C01G021180 Cla97C07G128310 Cla97C11G219500 Cla97C10G204380 Cla97C11G217020 Cla97C01G019400 Cla97C10G187080 Cla97C01G006900 Cla97C11G209140 Cla97C06G123270 Cla97C02G028260 Cla97C01G022990 Cla97C06G119980	Cla97C08G157140 Cla97C01G021180 Cla97C10G187080 Cla97C10G188640 Cla97C07G142250 Cla97C09G179520 Cla97C01G005440 Cla97C09G176160 Cla97C11G217310 Cla97C07G128830 Cla97C01G019400 Cla97C05G104620 Cla97C07G128310 Cla97C07G132630 Cla97C05G093570 Cla97C06G122210 Cla97C09G167720 Cla97C08G152650 Cla97C01G016710 Cla97C01G006900 Cla97C09G173910	Cla97C05G099260 Cla97C07G128310 Cla97C02G037330 Cla97C05G089140 Cla97C06G123270 Cla97C05G084000 Cla97C02G028260 Cla97C05G085820 Cla97C01G007030 Cla97C05G106120 Cla97C10G205620 Cla97C06G122130 Cla97C10G187080 Cla97C11G208800 Cla97C10G194080 Cla97C11G211600 Cla97C11G209140 Cla97C05G099500 Cla97C04G070780 Cla97C02G036850 Cla97C09G169250 Cla97C11G217020 Cla97C08G157140 Cla97C06G119980	Cla97C11G220140 Cla97C02G049410 Cla97C09G171260 Cla97C07G128310 Cla97C06G110400 Cla97C10G191650 Cla97C05G096750 Cla97C04G070780 Cla97C11G219500 Cla97C04G078560 Cla97C02G029640 Cla97C10G197710 Cla97C09G169250 Cla97C06G119980 Cla97C02G050380 Cla97C02G037330 Cla97C11G212480 Cla97C11G211600 Cla97C04G077450 Cla97C10G204380 Cla97C07G143650 Cla97C06G122130 Cla97C08G152650 Cla97C11G208800 Cla97C05G106120…
biological process	growth	GO:0040007	Cla97C05G087930 Cla97C09G183940 Cla97C09G176160 Cla97C01G019400 Cla97C06G119980	Cla97C01G019400 Cla97C05G087930 Cla97C07G142250 Cla97C09G176160	Cla97C05G106120 Cla97C06G119980 Cla97C03G052500 Cla97C02G036850 Cla97C11G211600 Cla97C05G107400	Cla97C01G023770 Cla97C04G078560 Cla97C06G125050 Cla97C05G106120 Cla97C05G096750 Cla97C02G049410 Cla97C07G142250 Cla97C09G176160 Cla97C11G211600 Cla97C07G143650 Cla97C06G119980 Cla97C03G052500 Cla97C02G036850 Cla97C09G183940 Cla97C05G107400
biological process	single-organism process	GO: 0044699	Cla97C03G063270 Cla97C01G024750 Cla97C06G118770 Cla97C01G009380 Cla97C02G034880 Cla97C11G214530 Cla97C09G176160 Cla97C09G181590 Cla97C04G071820 Cla97C05G101020 Cla97C05G096560 Cla97C09G182640 Cla97C10G202530 Cla97C04G075850 Cla97C02G049120 Cla97C05G101000 Cla97C03G060540 Cla97C10G204730 Cla97C09G171450 Cla97C07G137260 Cla97C10G190270 Cla97C01G003830 Cla97C02G042820 Cla97C09G175530 Cla97C04G076580…	Cla97C08G155260 Cla97C11G211900 Cla97C09G180810 Cla97C08G153350 Cla97C08G145700 Cla97C04G071940 Cla97C01G016510 Cla97C06G121490 Cla97C05G089090 Cla97C02G049890 Cla97C10G193030 Cla97C05G107470 Cla97C01G024490 Cla97C05G084450 Cla97C03G067610 Cla97C01G024630 Cla97C01G014770 Cla97C02G036540 Cla97C01G018420 Cla97C09G164590 Cla97C05G103780 Cla97C03G056320 Cla97C11G208130 Cla97C05G090400 Cla97C01G006480…	Cla97C09G168870 Cla97C11G209140 Cla97C10G204730 Cla97C01G007850 Cla97C02G047680 Cla97C05G103160 Cla97C04G071820 Cla97C07G130520 Cla97C03G054660 Cla97C05G083340 Cla97C06G123790 Cla97C01G010680 Cla97C05G089140 Cla97C10G202530 Cla97C05G103070 Cla97C02G041430 Cla97C07G137780 Cla97C02G037920 Cla97C02G042310 Cla97C02G038880 Cla97C03G051130 Cla97C01G002480 Cla97C08G146990 Cla97C03G054650 Cla97C02G027250…	Cla97C05G089770 Cla97C11G223720 Cla97C02G042440 Cla97C09G178670 Cla97C07G139470 Cla97C06G109660 Cla97C06G114820 Cla97C05G087740 Cla97C11G210620 Cla97C01G001780 Cla97C02G036270 Cla97C01G010680 Cla97C10G191340 Cla97C02G038900 Cla97C02G034870 Cla97C09G176940 Cla97C05G096450 Cla97C02G041470 Cla97C02G041050 Cla97C09G168850 Cla97C01G002830 Cla97C02G049640 Cla97C08G146400 Cla97C11G223610 Cla97C02G049760…
biological process	rhythmic process	GO:0048511		Cla97C07G132630		Cla97C07G132630
biological process	response to stimulus	GO:0050896	Cla97C02G042000 Cla97C05G084720 Cla97C09G175250 Cla97C01G001810 Cla97C03G067600 Cla97C02G049890 Cla97C02G034360 Cla97C03G067590 Cla97C10G200550 Cla97C10G204760 Cla97C01G003700 Cla97C06G126250 Cla97C01G006350 Cla97C06G124800 Cla97C08G155240 Cla97C09G184240 Cla97C10G190270 Cla97C11G213230 Cla97C09G177290 Cla97C01G007350 Cla97C05G093340 Cla97C05G085470 Cla97C06G110820 Cla97C11G218140 Cla97C03G054140…	Cla97C06G111250 Cla97C08G157760 Cla97C04G070210 Cla97C02G050670 Cla97C01G016450 Cla97C02G031350 Cla97C02G045860 Cla97C02G028310 Cla97C05G103160 Cla97C09G164550 Cla97C04G074330 Cla97C02G049940 Cla97C09G178530 Cla97C09G179130 Cla97C03G053080 Cla97C06G116140 Cla97C06G127300 Cla97C07G128830 Cla97C11G224830 Cla97C09G177290 Cla97C09G176160 Cla97C08G152180 Cla97C09G181300 Cla97C04G076600 Cla97C05G088420…	Cla97C02G050670 Cla97C11G220240 Cla97C08G148550 Cla97C02G028330 Cla97C08G157760 Cla97C01G016210 Cla97C02G042000 Cla97C09G177290 Cla97C09G179710 Cla97C02G037530 Cla97C07G128310 Cla97C02G049890 Cla97C10G193420 Cla97C01G017890 Cla97C04G070210 Cla97C11G210540 Cla97C11G221050 Cla97C11G217020 Cla97C11G208930 Cla97C06G111290 Cla97C11G208770 Cla97C08G154380 Cla97C02G045070 Cla97C11G210530 Cla97C07G135740…	Cla97C01G012090 Cla97C07G135750 Cla97C05G088770 Cla97C11G208930 Cla97C11G206420 Cla97C11G210480 Cla97C08G158730 Cla97C01G016210 Cla97C03G055890 Cla97C01G017890 Cla97C02G037530 Cla97C05G102540 Cla97C05G099830 Cla97C11G218160 Cla97C01G007850 Cla97C09G168120 Cla97C08G145600 Cla97C04G076600 Cla97C02G044760 Cla97C05G096750 Cla97C05G095600 Cla97C10G197710 Cla97C02G029640 Cla97C02G049940 Cla97C03G058680…
biological process	localization	GO:0051179	Cla97C01G017890 Cla97C01G000270 Cla97C07G140110 Cla97C05G085120 Cla97C07G134820 Cla97C10G184690 Cla97C03G058360 Cla97C08G148030 Cla97C08G147310 Cla97C05G094450 Cla97C05G104730 Cla97C08G152250 Cla97C05G104720 Cla97C05G102390 Cla97C01G010240 Cla97C08G149190 Cla97C10G187430 Cla97C07G139190 Cla97C02G049340 Cla97C09G164200 Cla97C01G001550 Cla97C10G195980 Cla97C05G093740 Cla97C05G090530 Cla97C06G125510…	Cla97C03G053000 Cla97C05G093740 Cla97C05G085120 Cla97C08G156420 Cla97C11G223450 Cla97C03G051250 Cla97C01G017730 Cla97C08G148110 Cla97C01G000270 Cla97C02G028310 Cla97C05G103160 Cla97C06G118770 Cla97C09G162760 Cla97C03G054880 Cla97C01G001210 Cla97C07G128920 Cla97C08G148010 Cla97C06G127440 Cla97C05G104720 Cla97C08G154850 Cla97C11G210700 Cla97C09G163930 Cla97C10G190690 Cla97C06G127920 Cla97C09G178350…	Cla97C05G089770 Cla97C09G170080 Cla97C05G102850 Cla97C11G221380 Cla97C06G115110 Cla97C01G020150 Cla97C09G174450 Cla97C11G219090 Cla97C05G106700 Cla97C09G175000 Cla97C06G122990 Cla97C01G014630 Cla97C02G050620 Cla97C10G186270 Cla97C08G146490 Cla97C05G106580 Cla97C07G140440 Cla97C02G028310 Cla97C01G021760 Cla97C05G087080 Cla97C01G000640 Cla97C07G134810 Cla97C10G191930 Cla97C05G094450 Cla97C10G197920…	Cla97C07G141280 Cla97C07G140440 Cla97C01G025050 Cla97C01G017890 Cla97C08G145900 Cla97C02G044450 Cla97C02G035520 Cla97C05G095370 Cla97C10G197710 Cla97C08G159680 Cla97C01G002660 Cla97C05G096750 Cla97C07G130790 Cla97C06G117900 Cla97C04G073900 Cla97C03G067610 Cla97C06G120940 Cla97C03G056800 Cla97C01G023770 Cla97C11G211300 Cla97C05G084140 Cla97C05G107420 Cla97C01G004300 Cla97C06G120270 Cla97C10G206090…
biological process	multi-organism process	GO:0051704	Cla97C01G024350 Cla97C02G042470 Cla97C09G167720 Cla97C07G144530 Cla97C01G007350 Cla97C07G143030 Cla97C01G007340	Cla97C02G042460 Cla97C09G167720 Cla97C01G024350 Cla97C11G217310 Cla97C02G042470 Cla97C01G007340 Cla97C07G142250 Cla97C10G195960	Cla97C01G007030 Cla97C08G158730 Cla97C02G026360 Cla97C09G179380 Cla97C01G007340 Cla97C02G036850 Cla97C02G042470	Cla97C05G096750 Cla97C08G158730 Cla97C02G029640 Cla97C01G007350 Cla97C09G179380 Cla97C02G036850 Cla97C02G026360 Cla97C07G142250
biological process	biological regulation	GO:0065007	Cla97C06G112840 Cla97C11G221460 Cla97C11G212900 Cla97C01G022990 Cla97C02G047040 Cla97C01G015900 Cla97C01G021510 Cla97C07G128790 Cla97C10G187080 Cla97C10G200540 Cla97C08G150290 Cla97C11G225230 Cla97C09G166350 Cla97C02G036250 Cla97C08G148550 Cla97C10G198640 Cla97C09G167240 Cla97C02G043970 Cla97C05G107750 Cla97C07G128310 Cla97C09G181250 Cla97C03G053010 Cla97C09G179130 Cla97C09G163710 Cla97C09G163890…	Cla97C08G160780 Cla97C05G085160 Cla97C07G132630 Cla97C02G046360 Cla97C11G215520 Cla97C01G007450 Cla97C07G135040 Cla97C05G100280 Cla97C09G167720 Cla97C08G152650 Cla97C02G040470 Cla97C09G168010 Cla97C05G099230 Cla97C02G034700 Cla97C08G148560 Cla97C01G002130 Cla97C08G157140 Cla97C11G223720 Cla97C09G181250 Cla97C09G164500 Cla97C05G088160 Cla97C06G121480 Cla97C03G054370 Cla97C11G223740 Cla97C11G217310…	Cla97C09G166350 Cla97C02G037530 Cla97C07G128310 Cla97C05G088270 Cla97C05G099260 Cla97C08G156170 Cla97C09G174150 Cla97C05G080370 Cla97C01G016210 Cla97C08G160780 Cla97C08G148550 Cla97C06G111840 Cla97C01G004570 Cla97C01G001990 Cla97C06G123300 Cla97C05G098160 Cla97C06G123840 Cla97C05G085700 Cla97C09G167230 Cla97C06G111000 Cla97C08G159620 Cla97C07G129510 Cla97C10G200540 Cla97C03G065030 Cla97C05G092380…	Cla97C06G123780 Cla97C06G118630 Cla97C05G081370 Cla97C02G035140 Cla97C01G006690 Cla97C10G202460 Cla97C07G140130 Cla97C05G080560 Cla97C04G077450 Cla97C07G135040 Cla97C09G175940 Cla97C01G003370 Cla97C10G190480 Cla97C09G179760 Cla97C02G039460 Cla97C01G006350 Cla97C10G185200 Cla97C04G070780 Cla97C05G091190 Cla97C06G110400 Cla97C07G130890 Cla97C06G117530 Cla97C09G184270 Cla97C03G053010 Cla97C05G089170…
biological process	cellular component organization or biogenesis	GO:0071840	Cla97C01G006670 Cla97C04G068590 Cla97C09G164170 Cla97C11G219500 Cla97C09G168010 Cla97C03G054370 Cla97C09G178320 Cla97C09G176160 Cla97C09G183890 Cla97C08G152250 Cla97C05G093550 Cla97C04G072030 Cla97C02G028260 Cla97C09G166430 Cla97C06G125510 Cla97C01G006690 Cla97C10G201220 Cla97C03G063550 Cla97C02G032260 Cla97C01G007090 Cla97C07G144520 Cla97C05G087930 Cla97C02G031180 Cla97C02G047600 Cla97C01G019560…	Cla97C05G089090 Cla97C09G183270 Cla97C09G168010 Cla97C09G178320 Cla97C10G201220 Cla97C02G042560 Cla97C04G074810 Cla97C10G188640 Cla97C07G134510 Cla97C02G046310 Cla97C03G059780 Cla97C10G198950 Cla97C04G079530 Cla97C05G088160 Cla97C01G006300 Cla97C02G032260 Cla97C05G095600 Cla97C10G186600 Cla97C03G054370 Cla97C11G212710 Cla97C01G017730 Cla97C04G079450 Cla97C01G019400 Cla97C05G081690 Cla97C05G104620…	Cla97C02G039440 Cla97C05G105620 Cla97C09G171500 Cla97C09G167260 Cla97C05G107400 Cla97C09G174320 Cla97C10G194080 Cla97C03G054370 Cla97C05G087810 Cla97C06G121920 Cla97C02G036850 Cla97C11G212620 Cla97C02G047600 Cla97C05G084730 Cla97C06G122590 Cla97C02G026860 Cla97C06G123270 Cla97C01G002000 Cla97C10G204200 Cla97C07G133420 Cla97C07G141120 Cla97C01G017930 Cla97C06G109870 Cla97C07G138160 Cla97C11G211600…	Cla97C10G195100 Cla97C00G000070 Cla97C05G095600 Cla97C02G027980 Cla97C02G029640 Cla97C05G096750 Cla97C09G171410 Cla97C11G219500 Cla97C06G122590 Cla97C02G041050 Cla97C05G101820 Cla97C05G088160 Cla97C09G164920 Cla97C09G164290 Cla97C11G211600 Cla97C01G017930 Cla97C04G073680 Cla97C05G087810 Cla97C03G067530 Cla97C05G090940 Cla97C02G026860 Cla97C08G146150 Cla97C02G037330 Cla97C04G070440 Cla97C01G026140…
biological process	detoxification	GO:0098754	Cla97C02G049930 Cla97C01G002890 Cla97C11G214530 Cla97C02G049950 Cla97C02G049890 Cla97C09G177290 Cla97C09G184240 Cla97C02G049920	Cla97C01G002890 Cla97C02G049920 Cla97C10G195960 Cla97C11G224830 Cla97C09G177290 Cla97C05G097140 Cla97C05G088420 Cla97C01G016570 Cla97C08G152180 Cla97C02G049940 Cla97C02G049950 Cla97C04G071940 Cla97C02G049930 Cla97C02G049890 Cla97C04G070210 Cla97C03G067430	Cla97C09G180150 Cla97C09G177290 Cla97C02G049890 Cla97C02G045070 Cla97C09G177060 Cla97C02G047680 Cla97C05G088420 Cla97C11G220240 Cla97C04G070210	Cla97C02G049920 Cla97C10G203590 Cla97C02G049930 Cla97C07G144420 Cla97C03G055890 Cla97C01G019890 Cla97C11G224830 Cla97C01G020000 Cla97C03G059200 Cla97C11G206420 Cla97C05G088420 Cla97C09G184240 Cla97C05G097140 Cla97C03G067430 Cla97C09G178920 Cla97C02G049940 Cla97C07G128300 Cla97C04G070210 Cla97C01G016570 Cla97C09G180150 Cla97C09G177060 Cla97C08G152180 Cla97C11G220240
