# Supplementary material
Source: MDPI journal article supplement (https://www.mdpi.com/2073-4395/13/3/618)
Supplement: s1 [file s1 › Table S5.xlsx]

## Sheet: Ss 0 d vs. Ss 1 d
Table S5. KEGG pathway analysis of DEGs under salt stress.
#KEGG_n	431	KEGG_N	4382
#Pathway	ko_ID	DEgene	gene	DEgene_all	gene_all
Protein processing in endoplasmic reticulum	ko04141	48	168	431	4382	Cla97C01G000110;Cla97C01G001870;Cla97C01G006780;Cla97C01G007690;Cla97C01G021800;Cla97C01G024530;Cla97C01G024750;Cla97C02G040810;Cla97C02G043970;Cla97C03G051930;Cla97C03G053140;Cla97C03G055230;Cla97C03G062120;Cla97C03G066320;Cla97C03G067590;Cla97C03G067600;Cla97C03G067620;Cla97C03G067630;Cla97C04G071950;Cla97C04G075000;Cla97C04G075600;Cla97C05G080230;Cla97C05G099440;Cla97C05G108440;Cla97C06G114150…	K13993+K09490+K14011+K09487+K12669+K23741+K10950+K08057+K09584+K13993+K09580+K08054+K09503+K13989+K04079+K04079+K04079+K04079+K13993+K03283+K09523+K09481+K13993+K13993+K07953+K03283+K10084+K13525+K07342+K13993+K13993+K13993+K08057+K13989+K13993+K09580+K14003+K12666+K09487+K09517+K09584+K03283+K03283+K03283+K12668+K13993+K09486+K10956
Plant-pathogen interaction	ko04626	38	160	431	4382	Cla97C01G007690;Cla97C01G019720;Cla97C01G021640;Cla97C01G024350;Cla97C02G044900;Cla97C03G053010;Cla97C03G063250;Cla97C03G067590;Cla97C03G067600;Cla97C03G067620;Cla97C03G067630;Cla97C04G071530;Cla97C04G079670;Cla97C05G085840;Cla97C05G088220;Cla97C05G090640;Cla97C05G091050;Cla97C05G093380;Cla97C05G100760;Cla97C05G102910;Cla97C05G103740;Cla97C05G104600;Cla97C06G112840;Cla97C06G126240;Cla97C06G127530…	K09487+K13412+K13412+K13420+K13434+K20536+K13449+K04079+K04079+K04079+K04079+K02183+K05391+K13448+K02183+K12795+K05391+K13448+K13448+K01373+K13412+K15397+K20600+K18875+K13448+K13425+K13448+K09487+K15397+K13436+K02183+K13448+K05391+K13436+K13448+K13412+K13424+K13448
Plant hormone signal transduction	ko04075	29	241	431	4382	Cla97C01G001810;Cla97C01G009310;Cla97C01G014900;Cla97C01G016350;Cla97C01G018680;Cla97C03G052090;Cla97C03G063250;Cla97C03G066470;Cla97C05G083250;Cla97C05G085710;Cla97C05G088710;Cla97C05G089520;Cla97C05G091070;Cla97C05G092790;Cla97C05G098030;Cla97C06G111250;Cla97C06G116140;Cla97C06G117070;Cla97C06G120580;Cla97C06G126250;Cla97C07G129670;Cla97C07G133100;Cla97C08G148550;Cla97C08G155010;Cla97C08G155240…	K14486+K14508+K13415+K14487+K14503+K14497+K13449+K14497+K14500+K14484+K14488+K14497+K14497+K14487+K14515+K14488+K14484+K14484+K14484+K14492+K14484+K14496+K14492+K14484+K14490+K14497+K14484+K14496+K14488
Carbon metabolism	ko01200	28	230	431	4382	Cla97C00G000150;Cla97C01G000200;Cla97C01G008870;Cla97C01G009760;Cla97C01G017570;Cla97C02G042820;Cla97C02G046130;Cla97C02G049120;Cla97C03G054650;Cla97C03G054660;Cla97C03G054690;Cla97C03G063270;Cla97C04G071440;Cla97C04G076390;Cla97C04G076580;Cla97C06G117660;Cla97C06G118090;Cla97C06G122310;Cla97C07G136660;Cla97C07G141290;Cla97C07G144010;Cla97C09G165970;Cla97C09G182470;Cla97C10G202380;Cla97C11G213800…	K01681+K01057+K00031+K02437+K00140+K00131+K01803+K00844+K00134+K00134+K01638+K00844+K01803+K01754+K01689+K00600+K00297+K00616+K00026+K11517+K00850+K01647+K00640+K01623+K00134+K01783+K05605+K01595+K01637
Biosynthesis of amino acids	ko01230	27	210	431	4382	Cla97C00G000150;Cla97C01G008240;Cla97C01G008870;Cla97C02G035330;Cla97C02G045450;Cla97C02G046130;Cla97C03G054650;Cla97C03G054660;Cla97C04G071440;Cla97C04G076390;Cla97C04G076580;Cla97C06G117660;Cla97C06G119180;Cla97C06G122310;Cla97C07G144010;Cla97C08G150170;Cla97C09G165970;Cla97C09G182470;Cla97C10G196410;Cla97C10G198850;Cla97C10G202380;Cla97C11G207970;Cla97C11G209930;Cla97C11G211370;Cla97C11G213800…	K01681+K11755+K00031+K05359+K01953+K01803+K00134+K00134+K01803+K01754+K01689+K00600+K01620+K00616+K00850+K01736+K01647+K00640+K00549+K00549+K01623+K01733+K15227+K01850+K00134+K01783+K10206
Phenylpropanoid biosynthesis	ko00940	27	179	431	4382	Cla97C01G018700;Cla97C02G033050;Cla97C02G033070;Cla97C02G033110;Cla97C02G049890;Cla97C02G049920;Cla97C02G049930;Cla97C02G049950;Cla97C03G053800;Cla97C04G075810;Cla97C04G075820;Cla97C04G075850;Cla97C05G092580;Cla97C05G096160;Cla97C05G096560;Cla97C07G136120;Cla97C08G153160;Cla97C09G165820;Cla97C09G165830;Cla97C09G177290;Cla97C09G184240;Cla97C10G193870;Cla97C10G195860;Cla97C11G214530;Cla97C11G219500…	K12356+K23260+K23260+K23260+K00430+K00430+K00430+K00430+K01904+K10775+K10775+K10775+K23260+K01188+K00083+K12356+K01188+K01904+K01904+K00430+K00430+K01054+K09753+K00430+K01904+K00588+K05350
MAPK signaling pathway - plant	ko04016	22	143	431	4382	Cla97C01G020270;Cla97C01G024350;Cla97C03G052090;Cla97C03G053010;Cla97C03G054620;Cla97C03G063250;Cla97C03G066470;Cla97C04G071530;Cla97C05G088220;Cla97C05G089520;Cla97C05G091070;Cla97C05G098030;Cla97C06G112840;Cla97C07G133100;Cla97C07G135040;Cla97C07G135080;Cla97C09G162080;Cla97C09G171330;Cla97C09G174770;Cla97C09G179530;Cla97C10G205870;Cla97C11G208020	K20547+K13420+K14497+K20536+K00940+K13449+K14497+K02183+K02183+K14497+K14497+K14515+K20600+K14496+K13425+K20772+K14497+K20714+K14496+K02183+K13424+K20603
Endocytosis	ko04144	20	136	431	4382	Cla97C01G009380;Cla97C02G033250;Cla97C02G037460;Cla97C02G041000;Cla97C02G045860;Cla97C03G058730;Cla97C03G065510;Cla97C04G075000;Cla97C05G103660;Cla97C06G119280;Cla97C07G139470;Cla97C08G161780;Cla97C09G162400;Cla97C09G167240;Cla97C09G172860;Cla97C09G181360;Cla97C09G181410;Cla97C10G188020;Cla97C10G195310;Cla97C11G221590	K07889+K07937+K19366+K01115+K07904+K07904+K12191+K03283+K12198+K03283+K01115+K07937+K12197+K07937+K03283+K03283+K03283+K01115+K07904+K00889
Glutathione metabolism	ko00480	20	80	431	4382	Cla97C01G002890;Cla97C01G008870;Cla97C01G012000;Cla97C01G018570;Cla97C03G060050;Cla97C04G074130;Cla97C04G074140;Cla97C04G074260;Cla97C04G074280;Cla97C04G079260;Cla97C04G079270;Cla97C05G083070;Cla97C05G084410;Cla97C05G084420;Cla97C05G108580;Cla97C06G123950;Cla97C07G137320;Cla97C08G157490;Cla97C08G157520;Cla97C09G168660	K00432+K00031+K00797+K18592+K00799+K00799+K00799+K00799+K00799+K00799+K00799+K00799+K00799+K00799+K22596+K00799+K00799+K00799+K01581+K00799
Biosynthesis of cofactors	ko01240	19	226	431	4382	Cla97C02G043390;Cla97C02G045540;Cla97C02G049390;Cla97C03G054620;Cla97C03G054750;Cla97C04G071820;Cla97C05G083380;Cla97C05G103780;Cla97C06G117660;Cla97C06G126270;Cla97C06G127490;Cla97C07G131150;Cla97C09G162530;Cla97C09G173710;Cla97C10G190050;Cla97C10G196140;Cla97C10G205900;Cla97C11G206830;Cla97C11G221840	K00793+K06215+K00128+K00940+K00939+K00059+K13800+K03801+K00600+K00966+K00939+K20884+K13248+K14190+K03809+K00059+K00002+K17497+K00128+K00012
Glycolysis / Gluconeogenesis	ko00010	19	116	431	4382	Cla97C01G004140;Cla97C01G023480;Cla97C02G042820;Cla97C02G046130;Cla97C02G049120;Cla97C02G049390;Cla97C03G054650;Cla97C03G054660;Cla97C03G063270;Cla97C04G071440;Cla97C04G076580;Cla97C05G094630;Cla97C07G144010;Cla97C09G172570;Cla97C10G202380;Cla97C10G205630;Cla97C10G205900;Cla97C11G213800;Cla97C11G221840	K00016+K01568+K00131+K01803+K00844+K00128+K00134+K00134+K00844+K01803+K01689+K00895+K00850+K18857+K01623+K01568+K00002+K00134+K00128
Amino sugar and nucleotide sugar metabolism	ko00520	16	123	431	4382	Cla97C01G000790;Cla97C01G020270;Cla97C02G040040;Cla97C02G049120;Cla97C03G057860;Cla97C03G063270;Cla97C04G078470;Cla97C06G126270;Cla97C07G135500;Cla97C07G142990;Cla97C08G153320;Cla97C09G180830;Cla97C10G201990;Cla97C11G206830;Cla97C11G210990;Cla97C11G216090	K01183+K20547+K02377+K00844+K01183+K00844+K13379+K00966+K01711+K13379+K13379+K16190+K00621+K17497+K00975+K00820+K00012
Starch and sucrose metabolism	ko00500	13	155	431	4382	Cla97C01G006710;Cla97C01G018360;Cla97C02G049120;Cla97C03G063270;Cla97C05G089120;Cla97C05G096160;Cla97C06G117750;Cla97C08G153160;Cla97C08G153950;Cla97C09G162720;Cla97C11G210990;Cla97C11G217200;Cla97C11G224350	K01179+K01087+K00844+K00844+K01087+K01188+K00696+K01188+K01087+K01193+K00975+K01179+K05350
Protein export	ko03060	12	45	431	4382	Cla97C01G001870;Cla97C02G041730;Cla97C05G080230;Cla97C05G082190;Cla97C05G101120;Cla97C06G127660;Cla97C07G132440;Cla97C07G139520;Cla97C08G148710;Cla97C11G209430;Cla97C11G219710;Cla97C11G223450	K09490+K12948+K09481+K03110+K03100+K07342+K12947+K13280+K03100+K13280+K12946+K10956
Cysteine and methionine metabolism	ko00270	11	97	431	4382	Cla97C01G004140;Cla97C01G012000;Cla97C01G021180;Cla97C02G043890;Cla97C05G104590;Cla97C06G115150;Cla97C07G135080;Cla97C07G136660;Cla97C09G182470;Cla97C10G196410;Cla97C10G198850	K00016+K00797+K05933+K05933+K00547+K01611+K20772+K00026+K00640+K00549+K00549
Fructose and mannose metabolism	ko00051	11	50	431	4382	Cla97C02G040040;Cla97C02G046130;Cla97C02G049120;Cla97C03G063270;Cla97C04G071440;Cla97C05G094630;Cla97C06G126270;Cla97C07G135500;Cla97C07G144010;Cla97C10G202380;Cla97C11G206830	K02377+K01803+K00844+K00844+K01803+K00895+K00966+K01711+K00850+K01623+K17497
Peroxisome	ko04146	10	77	431	4382	Cla97C01G008870;Cla97C02G041670;Cla97C02G042100;Cla97C06G116820;Cla97C07G130040;Cla97C07G132460;Cla97C07G141290;Cla97C09G179150;Cla97C10G193950;Cla97C11G208850	K00031+K00869+K04565+K13347+K07513+K13354+K11517+K01897+K08726+K13348
Glycerophospholipid metabolism	ko00564	9	91	431	4382	Cla97C02G041000;Cla97C02G042980;Cla97C06G113090;Cla97C07G139470;Cla97C07G142290;Cla97C07G142300;Cla97C09G183960;Cla97C10G188020;Cla97C11G218140	K01115+K00901+K13508+K01115+K18696+K18696+K13508+K01115+K00901+K14156
Oxidative phosphorylation	ko00190	9	139	431	4382	Cla97C04G075130;Cla97C04G078000;Cla97C05G092230;Cla97C06G122930;Cla97C07G139190;Cla97C09G179830;Cla97C10G196010;Cla97C10G203520;Cla97C11G218510	K01507+K03966+K00416+K01535+K01535+K01535+K03946+K02152+K02267+K02140
Carbon fixation in photosynthetic organisms	ko00710	9	67	431	4382	Cla97C02G046130;Cla97C03G054650;Cla97C03G054660;Cla97C04G071440;Cla97C07G136660;Cla97C10G202380;Cla97C11G213800;Cla97C11G213950;Cla97C11G223580	K01803+K00134+K00134+K01803+K00026+K01623+K00134+K01783+K01595
Pyruvate metabolism	ko00620	9	95	431	4382	Cla97C01G004140;Cla97C02G049390;Cla97C03G054690;Cla97C04G076020;Cla97C07G136660;Cla97C09G172570;Cla97C10G205900;Cla97C11G221840;Cla97C11G223580	K00016+K00128+K01638+K01512+K00026+K18857+K00002+K00128+K01595
Phagosome	ko04145	9	67	431	4382	Cla97C01G009380;Cla97C02G036250;Cla97C02G040810;Cla97C03G055230;Cla97C05G080230;Cla97C06G127660;Cla97C07G138500;Cla97C10G203520;Cla97C11G223450	K07889+K04392+K08057+K08054+K09481+K07342+K08057+K02152+K10956
Arginine and proline metabolism	ko00330	9	53	431	4382	Cla97C01G012000;Cla97C01G016510;Cla97C01G020100;Cla97C02G049390;Cla97C05G087090;Cla97C06G115150;Cla97C08G157520;Cla97C09G179900;Cla97C11G221840	K00797+K00472+K00472+K00128+K00472+K01611+K01581+K00472+K00128
Ribosome	ko03010	8	284	431	4382	Cla97C05G092200;Cla97C05G097520;Cla97C05G104480;Cla97C06G123710;Cla97C10G192140;Cla97C10G195000;Cla97C10G199560;Cla97C11G223220	K02960+K02924+K02876+K02885+K02904+K02863+K02886+K02886+K02950
Purine metabolism	ko00230	8	85	431	4382	Cla97C01G002730;Cla97C03G054620;Cla97C03G054750;Cla97C04G073560;Cla97C05G085860;Cla97C06G127490;Cla97C08G160120;Cla97C10G187450	K01951+K00940+K00939+K01490+K13811+K00939+K00759+K00759
RNA degradation	ko03018	8	87	431	4382	Cla97C01G011260;Cla97C03G064830;Cla97C04G076580;Cla97C06G124050;Cla97C07G144010;Cla97C10G192810;Cla97C10G196770;Cla97C11G222160	K12581+K04077+K01689+K14442+K00850+K04043+K00962+K12603
N-Glycan biosynthesis	ko00510	8	41	431	4382	Cla97C01G021800;Cla97C01G024530;Cla97C02G029390;Cla97C02G050170;Cla97C03G060320;Cla97C05G108040;Cla97C08G152080;Cla97C10G185910	K12669+K23741+K00736+K07252+K03842+K00737+K12666+K12668
Glycerolipid metabolism	ko00561	8	65	431	4382	Cla97C02G042980;Cla97C02G049390;Cla97C06G113090;Cla97C08G155300;Cla97C09G183960;Cla97C10G205900;Cla97C11G218140;Cla97C11G221840	K00901+K00128+K13508+K01054+K13508+K00002+K00901+K00128
Glyoxylate and dicarboxylate metabolism	ko00630	7	66	431	4382	Cla97C00G000150;Cla97C01G009760;Cla97C03G054690;Cla97C06G117660;Cla97C07G136660;Cla97C07G141290;Cla97C09G165970	K01681+K02437+K01638+K00600+K00026+K11517+K01647+K01637
Spliceosome	ko03040	7	151	431	4382	Cla97C04G075000;Cla97C05G107440;Cla97C06G119280;Cla97C09G172860;Cla97C09G181360;Cla97C09G181410;Cla97C10G200740	K03283+K12822+K03283+K03283+K03283+K03283+K12900
Terpenoid backbone biosynthesis	ko00900	7	50	431	4382	Cla97C02G041670;Cla97C02G045590;Cla97C07G137060;Cla97C08G156390;Cla97C09G173590;Cla97C09G179230;Cla97C10G191480	K00869+K11778+K05356+K01662+K13789+K03527+K01662
Phosphatidylinositol signaling system	ko04070	7	54	431	4382	Cla97C02G042980;Cla97C04G071530;Cla97C05G088220;Cla97C08G158410;Cla97C09G179530;Cla97C11G218140;Cla97C11G221590	K00901+K02183+K02183+K10572+K02183+K00901+K00889
Pentose phosphate pathway	ko00030	7	48	431	4382	Cla97C01G000200;Cla97C02G042820;Cla97C05G094630;Cla97C06G122310;Cla97C07G144010;Cla97C10G202380;Cla97C11G213950	K01057+K00131+K00895+K00616+K00850+K01623+K01783
Ubiquitin mediated proteolysis	ko04120	7	101	431	4382	Cla97C01G008060;Cla97C02G040090;Cla97C05G093120;Cla97C05G098460;Cla97C05G109000;Cla97C06G113960;Cla97C07G132780	K04506+K03873+K04506+K10144+K04506+K10581+K03348
RNA transport	ko03013	7	144	431	4382	Cla97C01G015590;Cla97C02G028240;Cla97C03G061110;Cla97C05G082440;Cla97C06G120000;Cla97C09G173550;Cla97C11G209470	K14307+K03113+K14321+K14324+K07936+K03113+K14310
Various types of N-glycan biosynthesis	ko00513	7	30	431	4382	Cla97C01G021800;Cla97C01G024530;Cla97C02G029390;Cla97C02G032930;Cla97C03G060320;Cla97C08G152080;Cla97C10G185910	K12669+K23741+K00736+K00753+K03842+K12666+K12668
Ascorbate and aldarate metabolism	ko00053	6	59	431	4382	Cla97C02G049390;Cla97C09G173710;Cla97C09G180530;Cla97C09G180830;Cla97C10G205900;Cla97C11G221840	K00128+K14190+K08232+K16190+K00002+K00128+K00012
beta-Alanine metabolism	ko00410	6	40	431	4382	Cla97C01G003780;Cla97C01G017570;Cla97C02G049390;Cla97C04G079700;Cla97C11G221840;Cla97C11G222430	K00276+K00140+K00128+K01580+K00128+K05605
Tyrosine metabolism	ko00350	6	51	431	4382	Cla97C01G003780;Cla97C03G057130;Cla97C05G082750;Cla97C06G123100;Cla97C07G136610;Cla97C09G172570	K00276+K00422+K01800+K07253+K00451+K18857
Glycine, serine and threonine metabolism	ko00260	6	67	431	4382	Cla97C01G003780;Cla97C01G009760;Cla97C04G076390;Cla97C06G117660;Cla97C06G119180;Cla97C11G207970	K00276+K02437+K01754+K00600+K01620+K01733
Ribosome biogenesis in eukaryotes	ko03008	6	78	431	4382	Cla97C02G026500;Cla97C06G120000;Cla97C06G123270;Cla97C07G128910;Cla97C07G143970;Cla97C09G162850	K03264+K07936+K14558+K14553+K14550+K14572
Pentose and glucuronate interconversions	ko00040	5	126	431	4382	Cla97C01G006690;Cla97C09G168010;Cla97C09G180830;Cla97C10G205900;Cla97C11G213950	K01051+K01051+K16190+K00002+K01783+K00012
Galactose metabolism	ko00052	5	49	431	4382	Cla97C02G049120;Cla97C03G063270;Cla97C04G070460;Cla97C07G144010;Cla97C09G162720	K00844+K00844+K06617+K00850+K01193
alpha-Linolenic acid metabolism	ko00592	5	52	431	4382	Cla97C02G049640;Cla97C07G130040;Cla97C09G171450;Cla97C09G172570;Cla97C11G214950	K00454+K07513+K00224+K18857+K05894
Inositol phosphate metabolism	ko00562	5	63	431	4382	Cla97C01G017570;Cla97C02G046130;Cla97C04G071440;Cla97C08G158410;Cla97C11G221590	K00140+K01803+K01803+K10572+K00889
Other types of O-glycan biosynthesis	ko00514	5	11	431	4382	Cla97C02G032260;Cla97C04G077040;Cla97C08G153540;Cla97C08G156920;Cla97C11G222060	K20783+K09667+K20782+K20782+K20784
Phenylalanine metabolism	ko00360	5	46	431	4382	Cla97C01G003780;Cla97C04G075810;Cla97C04G075820;Cla97C04G075850;Cla97C06G123100	K00276+K10775+K10775+K10775+K07253
Fatty acid degradation	ko00071	5	47	431	4382	Cla97C02G049390;Cla97C07G130040;Cla97C09G172570;Cla97C09G179150;Cla97C11G221840	K00128+K07513+K18857+K01897+K00128
Carotenoid biosynthesis	ko00906	5	31	431	4382	Cla97C01G024630;Cla97C02G050560;Cla97C05G090480;Cla97C07G137260;Cla97C07G137780	K09840+K09842+K15746+K09840+K09840
Brassinosteroid biosynthesis	ko00905	5	13	431	4382	Cla97C01G019400;Cla97C07G132580;Cla97C07G140950;Cla97C07G141430;Cla97C09G162570	K12637+K09588+K20623+K20623+K12638
Cyanoamino acid metabolism	ko00460	5	58	431	4382	Cla97C01G018570;Cla97C05G096160;Cla97C06G117660;Cla97C08G153160;Cla97C11G224350	K18592+K01188+K00600+K01188+K05350
Valine, leucine and isoleucine degradation	ko00280	5	48	431	4382	Cla97C01G017570;Cla97C02G049390;Cla97C07G130040;Cla97C11G221840;Cla97C11G222430	K00140+K00128+K07513+K00128+K05605
Fatty acid metabolism	ko01212	5	65	431	4382	Cla97C04G071820;Cla97C06G119690;Cla97C07G130040;Cla97C09G179150;Cla97C10G196140	K00059+K10781+K07513+K01897+K00059
Pyrimidine metabolism	ko00240	5	48	431	4382	Cla97C02G035770;Cla97C03G054620;Cla97C05G083380;Cla97C06G124800;Cla97C08G158740	K00857+K00940+K13800+K00876+K01520
Ubiquinone and other terpenoid-quinone biosynthesis	ko00130	5	54	431	4382	Cla97C03G053800;Cla97C09G165820;Cla97C09G165830;Cla97C10G190050;Cla97C11G219500	K01904+K01904+K01904+K03809+K01904
mRNA surveillance pathway	ko03015	5	96	431	4382	Cla97C01G007820;Cla97C05G082440;Cla97C06G116940;Cla97C07G144430;Cla97C11G209130	K15542+K14324+K14411+K14396+K11584
Homologous recombination	ko03440	4	44	431	4382	Cla97C01G014110;Cla97C06G125140;Cla97C08G152250;Cla97C11G221960	K02327+K07466+K10881+K10728
Fatty acid biosynthesis	ko00061	4	40	431	4382	Cla97C04G071820;Cla97C06G119690;Cla97C09G179150;Cla97C10G196140	K00059+K10781+K01897+K00059
DNA replication	ko03030	4	40	431	4382	Cla97C01G014110;Cla97C05G083310;Cla97C06G125140;Cla97C09G182000	K02327+K10742+K07466+K02324
Sulfur metabolism	ko00920	4	34	431	4382	Cla97C01G021510;Cla97C03G055820;Cla97C05G085860;Cla97C09G182470	K05907+K05907+K13811+K00640
Phenylalanine, tyrosine and tryptophan biosynthesis	ko00400	4	47	431	4382	Cla97C02G035330;Cla97C08G150170;Cla97C11G209930;Cla97C11G211370	K05359+K01736+K15227+K01850
Vitamin B6 metabolism	ko00750	4	16	431	4382	Cla97C01G000180;Cla97C02G045540;Cla97C09G162530;Cla97C11G207970	K05275+K06215+K13248+K01733
Proteasome	ko03050	4	49	431	4382	Cla97C01G009730;Cla97C05G101350;Cla97C08G152250;Cla97C09G163120	K02729+K03030+K10881+K02730
Citrate cycle (TCA cycle)	ko00020	4	46	431	4382	Cla97C00G000150;Cla97C01G008870;Cla97C07G136660;Cla97C09G165970	K01681+K00031+K00026+K01647
Thiamine metabolism	ko00730	4	22	431	4382	Cla97C03G054750;Cla97C06G127490;Cla97C08G156390;Cla97C10G191480	K00939+K00939+K01662+K01662
Base excision repair	ko03410	3	38	431	4382	Cla97C01G014110;Cla97C09G182000;Cla97C10G200550	K02327+K02324+K03652
Ether lipid metabolism	ko00565	3	22	431	4382	Cla97C02G041000;Cla97C07G139470;Cla97C10G188020	K01115+K01115+K01115
Riboflavin metabolism	ko00740	3	15	431	4382	Cla97C01G007100;Cla97C02G043390;Cla97C07G131150	K14379+K00793+K20884
2-Oxocarboxylic acid metabolism	ko01210	3	44	431	4382	Cla97C00G000150;Cla97C01G008870;Cla97C09G165970	K01681+K00031+K01647
Arachidonic acid metabolism	ko00590	3	17	431	4382	Cla97C01G002890;Cla97C01G018570;Cla97C10G193950	K00432+K18592+K08726
Selenocompound metabolism	ko00450	3	17	431	4382	Cla97C05G085860;Cla97C10G196410;Cla97C10G198850	K13811+K00549+K00549
Tryptophan metabolism	ko00380	3	43	431	4382	Cla97C02G049390;Cla97C07G129830;Cla97C11G221840	K00128+K11816+K00128
Propanoate metabolism	ko00640	3	34	431	4382	Cla97C01G004140;Cla97C01G017570;Cla97C11G222430	K00016+K00140+K05605
Cutin, suberine and wax biosynthesis	ko00073	3	30	431	4382	Cla97C06G110030;Cla97C07G133960;Cla97C11G214740	K15404+K17991+K15400
Alanine, aspartate and glutamate metabolism	ko00250	3	57	431	4382	Cla97C02G045450;Cla97C04G079700;Cla97C11G216090	K01953+K01580+K00820
Histidine metabolism	ko00340	3	19	431	4382	Cla97C01G008240;Cla97C02G049390;Cla97C11G221840	K11755+K00128+K00128
Nucleotide excision repair	ko03420	3	50	431	4382	Cla97C01G014110;Cla97C06G125140;Cla97C09G182000	K02327+K07466+K02324
Glycosaminoglycan degradation	ko00531	2	18	431	4382	Cla97C05G087980;Cla97C11G209950	K07964+K07964
SNARE interactions in vesicular transport	ko04130	2	38	431	4382	Cla97C06G116420;Cla97C10G201220	K08504+K08486
Limonene and pinene degradation	ko00903	2	7	431	4382	Cla97C02G049390;Cla97C11G221840	K00128+K00128
Lysine degradation	ko00310	2	23	431	4382	Cla97C02G049390;Cla97C11G221840	K00128+K00128
Pantothenate and CoA biosynthesis	ko00770	2	29	431	4382	Cla97C02G049390;Cla97C11G221840	K00128+K00128
Biotin metabolism	ko00780	2	14	431	4382	Cla97C04G071820;Cla97C10G196140	K00059+K00059
Zeatin biosynthesis	ko00908	2	26	431	4382	Cla97C06G115310;Cla97C07G128470	K10760+K10760
One carbon pool by folate	ko00670	2	18	431	4382	Cla97C06G117660;Cla97C06G118090	K00600+K00297
Circadian rhythm - plant	ko04712	2	34	431	4382	Cla97C08G151850;Cla97C08G156620	K12120+K16241
Fatty acid elongation	ko00062	2	25	431	4382	Cla97C05G104600;Cla97C08G158660	K15397+K15397
Isoquinoline alkaloid biosynthesis	ko00950	2	28	431	4382	Cla97C01G003780;Cla97C03G057130	K00276+K00422
RNA polymerase	ko03020	2	54	431	4382	Cla97C05G088090;Cla97C10G184990	K03017+K03006
Sphingolipid metabolism	ko00600	2	26	431	4382	Cla97C01G021090;Cla97C11G206820	K04711+K17108
Taurine and hypotaurine metabolism	ko00430	2	8	431	4382	Cla97C01G018570;Cla97C04G079700	K18592+K01580
Mismatch repair	ko03430	2	31	431	4382	Cla97C01G014110;Cla97C06G125140	K02327+K07466
Diterpenoid biosynthesis	ko00904	2	21	431	4382	Cla97C06G109480;Cla97C10G194450	K05282+K04125
Butanoate metabolism	ko00650	2	23	431	4382	Cla97C04G071610;Cla97C04G079700	K00109+K01580
Other glycan degradation	ko00511	2	18	431	4382	Cla97C02G047560;Cla97C11G206820	K01206+K17108
Flavonoid biosynthesis	ko00941	2	27	431	4382	Cla97C08G148220;Cla97C11G219680	K05278+K00588
Monobactam biosynthesis	ko00261	1	8	431	4382	Cla97C05G085860	K13811
Flavone and flavonol biosynthesis	ko00944	1	8	431	4382	Cla97C10G202920	K22771
Isoflavonoid biosynthesis	ko00943	1	4	431	4382	Cla97C01G016270	K13260
Lysine biosynthesis	ko00300	1	9	431	4382	Cla97C11G215540	K10206
Nitrogen metabolism	ko00910	1	36	431	4382	Cla97C08G154780	K01673
Steroid biosynthesis	ko00100	1	25	431	4382	Cla97C11G210690	K00801
Stilbenoid, diarylheptanoid and gingerol biosynthesis	ko00945	1	21	431	4382	Cla97C11G219680	K00588
Glycosphingolipid biosynthesis - lacto and neolacto series	ko00601	1	3	431	4382	Cla97C03G057170	K01988
Glycosphingolipid biosynthesis - globo and isoglobo series	ko00603	1	10	431	4382	Cla97C03G057170	K01988
Nicotinate and nicotinamide metabolism	ko00760	1	19	431	4382	Cla97C01G007630	K18551
Sesquiterpenoid and triterpenoid biosynthesis	ko00909	1	26	431	4382	Cla97C11G210690	K00801
Linoleic acid metabolism	ko00591	1	28	431	4382	Cla97C02G049640	K00454
ABC transporters	ko02010	1	24	431	4382	Cla97C09G174450	K05658
Valine, leucine and isoleucine biosynthesis	ko00290	1	16	431	4382	Cla97C04G076390	K01754
Tropane, piperidine and pyridine alkaloid biosynthesis	ko00960	1	25	431	4382	Cla97C01G003780	K00276
Biosynthesis of unsaturated fatty acids	ko01040	1	21	431	4382	Cla97C07G130040	K07513
Lipoic acid metabolism	ko00785	1	3	431	4382	Cla97C05G103780	K03801
Photosynthesis	ko00195	1	65	431	4382	Cla97C06G110700	K08903

## Sheet: Ss 0 d vs. Ss 3 d
#KEGG_n	378	KEGG_N	4382
#Pathway	ko_ID	DEgene	gene	DEgene_all	gene_all
Protein processing in endoplasmic reticulum	ko04141	38	168	378	4382	Cla97C01G000110;Cla97C01G001870;Cla97C01G006780;Cla97C01G008920;Cla97C01G024750;Cla97C02G033390;Cla97C02G040810;Cla97C02G043970;Cla97C03G051940;Cla97C03G055230;Cla97C04G071950;Cla97C04G074210;Cla97C04G075000;Cla97C04G075600;Cla97C05G099440;Cla97C05G108440;Cla97C07G132150;Cla97C07G132190;Cla97C07G132220;Cla97C07G132280;Cla97C07G132300;Cla97C07G132310;Cla97C07G138500;Cla97C07G139440;Cla97C07G141250…	K13993+K09490+K14011+K13993+K10950+K13993+K08057+K09584+K13993+K08054+K13993+K13993+K03283+K09523+K13993+K13993+K13993+K13993+K13993+K13993+K13993+K13993+K08057+K13993+K13993+K13989+K13993+K09580+K12666+K09487+K01230+K09517+K09584+K03283+K13993+K03283+K09486+K10956
Plant-pathogen interaction	ko04626	34	160	378	4382	Cla97C01G024350;Cla97C02G034010;Cla97C02G034020;Cla97C02G034120;Cla97C02G046650;Cla97C03G050940;Cla97C03G063250;Cla97C03G067430;Cla97C04G071530;Cla97C04G075740;Cla97C05G081060;Cla97C05G081070;Cla97C05G085840;Cla97C05G093380;Cla97C05G100760;Cla97C05G102910;Cla97C05G103740;Cla97C05G105150;Cla97C06G123830;Cla97C06G126240;Cla97C07G135040;Cla97C07G142250;Cla97C08G148820;Cla97C08G157760;Cla97C09G166980…	K13420+K13449+K13449+K13449+K15397+K13424+K13449+K13447+K02183+K05391+K05391+K05391+K13448+K13448+K13448+K01373+K13412+K13448+K13448+K18875+K13425+K13412+K13448+K09487+K13436+K13456+K02183+K13448+K13448+K13436+K13447+K13448+K13424+K13448
MAPK signaling pathway - plant	ko04016	31	143	378	4382	Cla97C01G020280;Cla97C01G024350;Cla97C02G026890;Cla97C02G034010;Cla97C02G034020;Cla97C02G034120;Cla97C03G050940;Cla97C03G052090;Cla97C03G063250;Cla97C03G066470;Cla97C03G067430;Cla97C04G071530;Cla97C04G073350;Cla97C04G077280;Cla97C05G085160;Cla97C05G091070;Cla97C06G116550;Cla97C07G133100;Cla97C07G135040;Cla97C07G135080;Cla97C08G152180;Cla97C09G162080;Cla97C09G168000;Cla97C09G171330;Cla97C09G174770…	K20547+K13420+K20725+K13449+K13449+K13449+K13424+K14497+K13449+K14497+K13447+K02183+K14496+K20604+K14516+K14497+K14516+K14496+K13425+K20772+K03781+K14497+K14509+K20714+K14496+K02183+K13447+K13424+K20603+K14515+K14509
Phenylpropanoid biosynthesis	ko00940	26	179	378	4382	Cla97C01G001290;Cla97C01G016570;Cla97C02G033050;Cla97C02G033070;Cla97C02G033110;Cla97C02G034290;Cla97C02G049890;Cla97C02G049920;Cla97C02G049930;Cla97C02G049940;Cla97C02G049950;Cla97C03G053800;Cla97C03G054720;Cla97C04G070210;Cla97C04G075810;Cla97C04G075820;Cla97C05G088420;Cla97C05G092580;Cla97C07G136120;Cla97C09G165550;Cla97C09G177290;Cla97C10G193130;Cla97C10G193870;Cla97C10G195860;Cla97C10G196380…	K00083+K00430+K23260+K23260+K23260+K01904+K00430+K00430+K00430+K00430+K00430+K01904+K01904+K00430+K10775+K10775+K11188+K23260+K12356+K09753+K00430+K18368+K01054+K09753+K05349+K00487
Plant hormone signal transduction	ko04075	26	241	378	4382	Cla97C02G031350;Cla97C02G032990;Cla97C02G034010;Cla97C02G034020;Cla97C02G034120;Cla97C03G052090;Cla97C03G063250;Cla97C03G066470;Cla97C04G073350;Cla97C05G083250;Cla97C05G085160;Cla97C05G091070;Cla97C05G101940;Cla97C06G111250;Cla97C06G116140;Cla97C06G116550;Cla97C06G120580;Cla97C06G122630;Cla97C07G133100;Cla97C08G155240;Cla97C09G162080;Cla97C09G164500;Cla97C09G168000;Cla97C09G174770;Cla97C11G209570…	K14488+K14432+K13449+K13449+K13449+K14497+K13449+K14497+K14496+K14500+K14516+K14497+K14505+K14488+K14484+K14516+K14484+K14504+K14496+K14490+K14497+K14484+K14509+K14496+K14515+K14509
Carbon metabolism	ko01200	25	230	378	4382	Cla97C01G006480;Cla97C01G008870;Cla97C01G020080;Cla97C02G042820;Cla97C02G049120;Cla97C03G063130;Cla97C03G066480;Cla97C04G076390;Cla97C04G076420;Cla97C04G076620;Cla97C05G086990;Cla97C05G103980;Cla97C05G107870;Cla97C06G124730;Cla97C07G136330;Cla97C07G138680;Cla97C08G152180;Cla97C08G155260;Cla97C09G163470;Cla97C10G193010;Cla97C11G210620;Cla97C11G211900;Cla97C11G213800;Cla97C11G220850;Cla97C11G223580	K01807+K00031+K01681+K00131+K00844+K00830+K00029+K01754+K01754+K01623+K01006+K01807+K14272+K01689+K00235+K00616+K03781+K00029+K00814+K00873+K01623+K00033+K00134+K01610+K01595+K01637
Biosynthesis of amino acids	ko01230	24	210	378	4382	Cla97C01G006480;Cla97C01G008240;Cla97C01G008870;Cla97C01G018010;Cla97C01G020080;Cla97C02G035330;Cla97C02G042740;Cla97C04G076390;Cla97C04G076420;Cla97C04G076620;Cla97C05G093490;Cla97C05G103980;Cla97C05G107870;Cla97C06G124730;Cla97C07G136260;Cla97C07G138680;Cla97C08G152630;Cla97C09G163470;Cla97C09G179000;Cla97C10G193010;Cla97C10G198850;Cla97C11G210620;Cla97C11G213800;Cla97C11G215540	K01807+K11755+K00031+K01626+K01681+K05359+K01620+K01754+K01754+K01623+K01915+K01807+K14272+K01689+K15849+K00616+K01953+K00814+K00145+K00873+K00549+K01623+K00134+K10206
Amino sugar and nucleotide sugar metabolism	ko00520	16	123	378	4382	Cla97C01G000780;Cla97C01G000790;Cla97C01G020280;Cla97C02G049120;Cla97C03G057860;Cla97C04G078470;Cla97C06G110160;Cla97C06G115410;Cla97C06G121350;Cla97C06G125020;Cla97C07G135500;Cla97C07G136830;Cla97C08G153320;Cla97C09G171410;Cla97C09G177130;Cla97C09G180830	K01183+K01183+K20547+K00844+K01183+K13379+K00847+K00975+K01183+K13379+K01711+K12450+K13379+K13648+K15920+K16190+K00012
Glycolysis / Gluconeogenesis	ko00010	15	116	378	4382	Cla97C01G004140;Cla97C01G023480;Cla97C02G042820;Cla97C02G049120;Cla97C04G076620;Cla97C05G081320;Cla97C05G086990;Cla97C06G124730;Cla97C09G172570;Cla97C10G193010;Cla97C10G197800;Cla97C10G205630;Cla97C11G210620;Cla97C11G213800;Cla97C11G220850	K00016+K01568+K00131+K00844+K01623+K01792+K01006+K01689+K18857+K00873+K01785+K01568+K01623+K00134+K01610
Endocytosis	ko04144	14	136	378	4382	Cla97C02G037460;Cla97C02G045860;Cla97C02G046360;Cla97C03G058730;Cla97C03G065510;Cla97C04G071180;Cla97C04G075000;Cla97C08G147390;Cla97C08G161780;Cla97C09G172860;Cla97C10G188020;Cla97C10G195310;Cla97C11G217390;Cla97C11G223740	K19366+K07904+K07901+K07904+K12191+K00889+K03283+K12471+K07937+K03283+K01115+K07904+K03283+K07904
Glutathione metabolism	ko00480	14	80	378	4382	Cla97C01G000540;Cla97C01G002890;Cla97C01G008870;Cla97C01G014770;Cla97C04G074140;Cla97C04G074260;Cla97C04G074280;Cla97C04G079270;Cla97C05G084410;Cla97C05G088420;Cla97C05G097140;Cla97C05G108580;Cla97C06G123950;Cla97C11G211900	K00797+K00432+K00031+K10807+K00799+K00799+K00799+K00799+K00799+K11188+K00432+K22596+K00799+K00033
Starch and sucrose metabolism	ko00500	14	155	378	4382	Cla97C01G001430;Cla97C02G027410;Cla97C02G049120;Cla97C05G084480;Cla97C06G110160;Cla97C06G115410;Cla97C06G117180;Cla97C07G136350;Cla97C08G153950;Cla97C09G162720;Cla97C10G186670;Cla97C10G196380;Cla97C10G198060;Cla97C11G217200	K13679+K01179+K00844+K01177+K00847+K00975+K01177+K01087+K01087+K01193+K01177+K05349+K00703+K01179
Biosynthesis of cofactors	ko01240	13	226	378	4382	Cla97C01G018740;Cla97C01G025210;Cla97C02G045540;Cla97C05G083380;Cla97C05G103780;Cla97C06G127490;Cla97C07G131150;Cla97C08G153730;Cla97C08G155040;Cla97C09G166100;Cla97C10G190050;Cla97C10G193010	K03809+K14760+K06215+K13800+K03801+K00939+K20884+K01922+K02492+K02303+K03809+K00873+K00012
Carbon fixation in photosynthetic organisms	ko00710	12	67	378	4382	Cla97C01G006480;Cla97C03G066480;Cla97C04G076620;Cla97C05G086990;Cla97C05G103980;Cla97C05G107870;Cla97C08G155260;Cla97C09G163470;Cla97C11G210620;Cla97C11G213800;Cla97C11G220850;Cla97C11G223580	K01807+K00029+K01623+K01006+K01807+K14272+K00029+K00814+K01623+K00134+K01610+K01595
Cysteine and methionine metabolism	ko00270	10	97	378	4382	Cla97C01G000540;Cla97C01G004140;Cla97C01G021180;Cla97C02G031170;Cla97C06G116020;Cla97C07G135080;Cla97C09G164550;Cla97C09G173910;Cla97C10G198850;Cla97C10G205990	K00797+K00016+K05933+K01244+K08967+K20772+K00837+K05933+K00549+K00827
alpha-Linolenic acid metabolism	ko00592	9	52	378	4382	Cla97C02G028490;Cla97C02G049640;Cla97C05G084200;Cla97C06G114580;Cla97C07G130040;Cla97C09G171450;Cla97C09G172570;Cla97C11G214950;Cla97C11G219830	K10528+K00454+K07513+K10527+K07513+K00224+K18857+K05894+K00454
Pyruvate metabolism	ko00620	9	95	378	4382	Cla97C01G004140;Cla97C01G021530;Cla97C03G066480;Cla97C05G086990;Cla97C08G155260;Cla97C09G172570;Cla97C10G193010;Cla97C11G220850;Cla97C11G223580	K00016+K01759+K00029+K01006+K00029+K18857+K00873+K01610+K01595
Peroxisome	ko04146	9	77	378	4382	Cla97C01G008870;Cla97C02G027590;Cla97C02G048790;Cla97C03G063130;Cla97C04G071940;Cla97C05G084200;Cla97C07G130040;Cla97C08G152180;Cla97C10G190570	K00031+K13348+K01640+K00830+K04565+K07513+K07513+K03781+K13348
Oxidative phosphorylation	ko00190	9	139	378	4382	Cla97C04G075130;Cla97C05G086670;Cla97C07G134860;Cla97C07G136330;Cla97C08G152480;Cla97C09G179830;Cla97C10G202000;Cla97C11G218510	K01507+K02256+K02114+K00235+K02109+K01535+K00419+K02267+K02140
Glycerolipid metabolism	ko00561	8	65	378	4382	Cla97C01G014020;Cla97C02G042980;Cla97C04G077250;Cla97C05G104240;Cla97C06G122780;Cla97C09G183960;Cla97C11G218140	K09480+K00901+K01054+K18693+K24189+K13508+K00901+K13509
Pentose phosphate pathway	ko00030	7	48	378	4382	Cla97C01G006480;Cla97C02G042820;Cla97C04G076620;Cla97C05G103980;Cla97C07G138680;Cla97C11G210620;Cla97C11G211900	K01807+K00131+K01623+K01807+K00616+K01623+K00033
Pentose and glucuronate interconversions	ko00040	7	126	378	4382	Cla97C01G006690;Cla97C05G082940;Cla97C05G106630;Cla97C09G167260;Cla97C09G168010;Cla97C09G180830	K01051+K01051+K01728+K01051+K01051+K16190+K00012
Terpenoid backbone biosynthesis	ko00900	7	50	378	4382	Cla97C02G032350;Cla97C02G045590;Cla97C06G125750;Cla97C07G137060;Cla97C09G173590;Cla97C09G179230;Cla97C10G191480	K03527+K11778+K10960+K05356+K13789+K03527+K01662
Alanine, aspartate and glutamate metabolism	ko00250	7	57	378	4382	Cla97C03G063130;Cla97C05G093490;Cla97C05G107870;Cla97C08G152630;Cla97C09G163470;Cla97C10G205990	K00830+K01915+K14272+K01953+K00814+K00827+K01580
Ubiquinone and other terpenoid-quinone biosynthesis	ko00130	7	54	378	4382	Cla97C01G018740;Cla97C01G025210;Cla97C02G034290;Cla97C03G053800;Cla97C03G054720;Cla97C10G190050;Cla97C11G217490	K03809+K14760+K01904+K01904+K01904+K03809+K00487
Glycine, serine and threonine metabolism	ko00260	7	67	378	4382	Cla97C01G003780;Cla97C02G042740;Cla97C03G063130;Cla97C04G076390;Cla97C04G076420;Cla97C05G107870;Cla97C10G205990	K00276+K01620+K00830+K01754+K01754+K14272+K00827
Glycerophospholipid metabolism	ko00564	6	91	378	4382	Cla97C02G042980;Cla97C05G104240;Cla97C09G183960;Cla97C10G188020;Cla97C11G218140	K00901+K18693+K13508+K01115+K00901+K14156+K13509
Protein export	ko03060	6	45	378	4382	Cla97C01G001870;Cla97C02G041730;Cla97C05G082190;Cla97C08G148710;Cla97C08G159120;Cla97C11G223450	K09490+K12948+K03110+K03100+K03100+K10956
Phagosome	ko04145	6	67	378	4382	Cla97C01G023290;Cla97C02G040810;Cla97C03G055230;Cla97C07G138500;Cla97C10G193030;Cla97C11G223450	K04392+K08057+K08054+K08057+K07374+K10956
Glyoxylate and dicarboxylate metabolism	ko00630	6	66	378	4382	Cla97C01G020080;Cla97C03G063130;Cla97C05G093490;Cla97C05G107870;Cla97C08G152180	K01681+K00830+K01915+K14272+K03781+K01637
Porphyrin and chlorophyll metabolism	ko00860	6	52	378	4382	Cla97C02G043280;Cla97C04G071470;Cla97C06G125750;Cla97C06G128140;Cla97C08G155040;Cla97C09G166100	K00218+K04035+K10960+K03428+K02492+K02303
Purine metabolism	ko00230	6	85	378	4382	Cla97C01G014770;Cla97C05G099770;Cla97C06G127490;Cla97C08G150350;Cla97C08G160120;Cla97C10G193010	K10807+K13811+K00939+K00856+K00759+K00873
Fructose and mannose metabolism	ko00051	6	50	378	4382	Cla97C02G049120;Cla97C04G076620;Cla97C05G100190;Cla97C06G110160;Cla97C07G135500;Cla97C11G210620	K00844+K01623+K19355+K00847+K01711+K01623
Spliceosome	ko03040	6	151	378	4382	Cla97C02G039800;Cla97C03G052980;Cla97C04G075000;Cla97C09G172860;Cla97C10G196790;Cla97C11G217390	K12859+K12881+K03283+K03283+K12823+K03283
Galactose metabolism	ko00052	5	49	378	4382	Cla97C02G049120;Cla97C05G107550;Cla97C09G162720;Cla97C09G167400;Cla97C10G197800	K00844+K18819+K01193+K06611+K01785
2-Oxocarboxylic acid metabolism	ko01210	5	44	378	4382	Cla97C01G008870;Cla97C01G020080;Cla97C05G107870;Cla97C09G163470;Cla97C09G179000	K00031+K01681+K14272+K00814+K00145
Carotenoid biosynthesis	ko00906	5	31	378	4382	Cla97C01G008760;Cla97C01G024630;Cla97C02G032900;Cla97C07G137780;Cla97C08G159520	K02291+K09840+K09843+K09840+K09843
Phosphatidylinositol signaling system	ko04070	5	54	378	4382	Cla97C02G042980;Cla97C04G071180;Cla97C04G071530;Cla97C09G179530;Cla97C11G218140	K00901+K00889+K02183+K02183+K00901
Other types of O-glycan biosynthesis	ko00514	5	11	378	4382	Cla97C02G032260;Cla97C02G048930;Cla97C04G077040;Cla97C08G153540;Cla97C08G156920	K20783+K20782+K09667+K20782+K20782
N-Glycan biosynthesis	ko00510	5	41	378	4382	Cla97C04G070880;Cla97C05G108040;Cla97C08G152080;Cla97C09G163690;Cla97C09G180810	K01001+K00737+K12666+K01230+K00737
Photosynthesis	ko00195	5	65	378	4382	Cla97C01G014340;Cla97C05G091890;Cla97C07G134860;Cla97C08G152480;Cla97C09G178700	K02701+K02639+K02114+K02109+K02689
Fatty acid degradation	ko00071	5	47	378	4382	Cla97C05G084200;Cla97C05G085370;Cla97C06G114580;Cla97C07G130040;Cla97C09G172570	K07513+K07517+K10527+K07513+K18857
Arginine and proline metabolism	ko00330	5	53	378	4382	Cla97C01G000540;Cla97C01G016510;Cla97C01G020100;Cla97C11G208130;Cla97C11G210580	K00797+K00472+K00472+K12259+K01583
Cyanoamino acid metabolism	ko00460	5	58	378	4382	Cla97C10G196380;Cla97C11G218190;Cla97C11G218210;Cla97C11G218220;Cla97C11G218280	K05349+K08248+K08248+K08248+K08248
Homologous recombination	ko03440	5	44	378	4382	Cla97C01G025020;Cla97C05G092420;Cla97C06G122820;Cla97C06G125140;Cla97C11G207550	K10683+K10875+K10739+K07466+K10879
Valine, leucine and isoleucine degradation	ko00280	4	48	378	4382	Cla97C02G048790;Cla97C05G084200;Cla97C07G130040;Cla97C10G205990	K01640+K07513+K07513+K00827
Citrate cycle (TCA cycle)	ko00020	4	46	378	4382	Cla97C01G008870;Cla97C01G020080;Cla97C07G136330;Cla97C11G220850	K00031+K01681+K00235+K01610
Sphingolipid metabolism	ko00600	4	26	378	4382	Cla97C01G021090;Cla97C03G057250;Cla97C05G086640;Cla97C11G206820	K04711+K04712+K04708+K17108
DNA replication	ko03030	4	40	378	4382	Cla97C05G083310;Cla97C06G122820;Cla97C06G125140;Cla97C09G182000	K10742+K10739+K07466+K02324
Ascorbate and aldarate metabolism	ko00053	4	59	378	4382	Cla97C03G066260;Cla97C09G180530;Cla97C09G180830	K00469+K08232+K16190+K00012
Sesquiterpenoid and triterpenoid biosynthesis	ko00909	4	26	378	4382	Cla97C03G056430;Cla97C03G056440;Cla97C10G190240;Cla97C10G190260	K14175+K14175+K15803+K15803
Mismatch repair	ko03430	4	31	378	4382	Cla97C03G058510;Cla97C06G122820;Cla97C06G125140;Cla97C11G208950	K10746+K10739+K07466+K08737
Arginine biosynthesis	ko00220	4	40	378	4382	Cla97C05G093490;Cla97C05G107870;Cla97C09G163470;Cla97C09G179000	K01915+K14272+K00814+K00145
Phenylalanine metabolism	ko00360	4	46	378	4382	Cla97C01G003780;Cla97C04G075810;Cla97C04G075820;Cla97C07G136260	K00276+K10775+K10775+K15849
Tryptophan metabolism	ko00380	4	43	378	4382	Cla97C05G084450;Cla97C05G105300;Cla97C08G152180;Cla97C09G164550	K11816+K22450+K03781+K00837
Pyrimidine metabolism	ko00240	4	48	378	4382	Cla97C01G014770;Cla97C02G035770;Cla97C05G083380;Cla97C08G158740	K10807+K00857+K13800+K01520
Nucleotide excision repair	ko03420	4	50	378	4382	Cla97C02G045580;Cla97C06G122820;Cla97C06G125140;Cla97C09G182000	K10140+K10739+K07466+K02324
Tyrosine metabolism	ko00350	4	51	378	4382	Cla97C01G003780;Cla97C05G082750;Cla97C07G136260;Cla97C09G172570	K00276+K01800+K15849+K18857
Ribosome	ko03010	4	284	378	4382	Cla97C01G000170;Cla97C06G123710;Cla97C10G195000;Cla97C11G222720	K02927+K02885+K02863+K02901
Ubiquitin mediated proteolysis	ko04120	3	101	378	4382	Cla97C01G000170;Cla97C02G045580;Cla97C09G175760	K02927+K10140+K10143
Photosynthesis - antenna proteins	ko00196	3	19	378	4382	Cla97C04G079070;Cla97C08G149600;Cla97C11G219570	K08910+K08917+K08908
RNA transport	ko03013	3	144	378	4382	Cla97C03G052980;Cla97C06G120000;Cla97C08G149890	K12881+K07936+K13126
RNA degradation	ko03018	3	87	378	4382	Cla97C01G011260;Cla97C06G124730;Cla97C08G149890	K12581+K01689+K13126
Circadian rhythm - plant	ko04712	3	34	378	4382	Cla97C06G111610;Cla97C06G111640;Cla97C09G175760	K12133+K12133+K10143
Fatty acid metabolism	ko01212	3	65	378	4382	Cla97C05G084200;Cla97C06G114580;Cla97C07G130040	K07513+K10527+K07513
Phenylalanine, tyrosine and tryptophan biosynthesis	ko00400	3	47	378	4382	Cla97C01G018010;Cla97C02G035330;Cla97C07G136260	K01626+K05359+K15849
mRNA surveillance pathway	ko03015	3	96	378	4382	Cla97C03G052980;Cla97C08G149890;Cla97C11G209130	K12881+K13126+K11584
beta-Alanine metabolism	ko00410	3	40	378	4382	Cla97C01G003780;Cla97C11G208130	K00276+K12259+K01580
Inositol phosphate metabolism	ko00562	3	63	378	4382	Cla97C01G018420;Cla97C03G066260;Cla97C04G071180	K01858+K00469+K00889
Selenocompound metabolism	ko00450	2	17	378	4382	Cla97C05G099770;Cla97C10G198850	K13811+K00549
Brassinosteroid biosynthesis	ko00905	2	13	378	4382	Cla97C01G019400;Cla97C07G141430	K12637+K20623
Nitrogen metabolism	ko00910	2	36	378	4382	Cla97C05G093490;Cla97C08G154780	K01915+K01673
Zeatin biosynthesis	ko00908	2	26	378	4382	Cla97C05G086820;Cla97C05G096700	K10760+K00279
Isoquinoline alkaloid biosynthesis	ko00950	2	28	378	4382	Cla97C01G003780;Cla97C07G136260	K00276+K15849
Linoleic acid metabolism	ko00591	2	28	378	4382	Cla97C02G049640;Cla97C11G219830	K00454+K00454
Thiamine metabolism	ko00730	2	22	378	4382	Cla97C06G127490;Cla97C10G191480	K00939+K01662
Arachidonic acid metabolism	ko00590	2	17	378	4382	Cla97C01G002890;Cla97C05G097140	K00432+K00432
Diterpenoid biosynthesis	ko00904	2	21	378	4382	Cla97C06G109480;Cla97C09G164590	K05282+K04124
Biosynthesis of unsaturated fatty acids	ko01040	2	21	378	4382	Cla97C05G084200;Cla97C07G130040	K07513+K07513
Other glycan degradation	ko00511	2	18	378	4382	Cla97C01G019850;Cla97C11G206820	K01191+K17108
Various types of N-glycan biosynthesis	ko00513	2	30	378	4382	Cla97C08G152080;Cla97C09G163690	K12666+K01230
Steroid biosynthesis	ko00100	2	25	378	4382	Cla97C01G024490;Cla97C07G143370	K09832+K09828
Glycosphingolipid biosynthesis - globo and isoglobo series	ko00603	2	10	378	4382	Cla97C03G057170;Cla97C10G205230	K01988+K01988
Glycosphingolipid biosynthesis - lacto and neolacto series	ko00601	2	3	378	4382	Cla97C03G057170;Cla97C10G205230	K01988+K01988
Tropane, piperidine and pyridine alkaloid biosynthesis	ko00960	2	25	378	4382	Cla97C01G003780;Cla97C07G136260	K00276+K15849
Valine, leucine and isoleucine biosynthesis	ko00290	2	16	378	4382	Cla97C04G076390;Cla97C04G076420	K01754+K01754
Ribosome biogenesis in eukaryotes	ko03008	2	78	378	4382	Cla97C02G026500;Cla97C06G120000	K03264+K07936
SNARE interactions in vesicular transport	ko04130	2	38	378	4382	Cla97C02G047080;Cla97C10G201220	K08506+K08486
Butanoate metabolism	ko00650	1	23	378	4382	Cla97C02G048790	K01640+K01580
Glycosaminoglycan degradation	ko00531	1	18	378	4382	Cla97C10G196000	K10532
Histidine metabolism	ko00340	1	19	378	4382	Cla97C01G008240	K11755
Lipoic acid metabolism	ko00785	1	3	378	4382	Cla97C05G103780	K03801
Ether lipid metabolism	ko00565	1	22	378	4382	Cla97C10G188020	K01115
RNA polymerase	ko03020	1	54	378	4382	Cla97C05G090150	K03023
Nicotinate and nicotinamide metabolism	ko00760	1	19	378	4382	Cla97C01G007630	K18551
Flavonoid biosynthesis	ko00941	1	27	378	4382	Cla97C11G217490	K00487
Sulfur metabolism	ko00920	1	34	378	4382	Cla97C05G099770	K13811
Riboflavin metabolism	ko00740	1	15	378	4382	Cla97C07G131150	K20884
Lysine biosynthesis	ko00300	1	9	378	4382	Cla97C11G215540	K10206
Fatty acid elongation	ko00062	1	25	378	4382	Cla97C02G046650	K15397
Propanoate metabolism	ko00640	1	34	378	4382	Cla97C01G004140	K00016
Synthesis and degradation of ketone bodies	ko00072	1	5	378	4382	Cla97C02G048790	K01640
Pantothenate and CoA biosynthesis	ko00770	1	29	378	4382	Cla97C08G153730	K01922
Basal transcription factors	ko03022	1	38	378	4382	Cla97C09G181980	K03139
Base excision repair	ko03410	1	38	378	4382	Cla97C09G182000	K02324
Vitamin B6 metabolism	ko00750	1	16	378	4382	Cla97C02G045540	K06215
Stilbenoid, diarylheptanoid and gingerol biosynthesis	ko00945	1	21	378	4382	Cla97C11G217490	K00487
Monobactam biosynthesis	ko00261	1	8	378	4382	Cla97C05G099770	K13811
Isoflavonoid biosynthesis	ko00943	1	4	378	4382	Cla97C01G016310	K13260

## Sheet: Rs 0 d vs. Rs 1 d
#KEGG_n	460	KEGG_N	4382
#Pathway	ko_ID	DEgene	gene	DEgene_all	gene_all
Plant hormone signal transduction	ko04075	45	241	460	4382	Cla97C01G007030;Cla97C01G007850;Cla97C01G016350;Cla97C01G018680;Cla97C02G031360;Cla97C02G032990;Cla97C02G034120;Cla97C02G048210;Cla97C03G052090;Cla97C03G058970;Cla97C03G063250;Cla97C03G066470;Cla97C04G071100;Cla97C04G073350;Cla97C05G081210;Cla97C05G085160;Cla97C05G085700;Cla97C05G085710;Cla97C05G088710;Cla97C05G089520;Cla97C05G091070;Cla97C05G092790;Cla97C05G101410;Cla97C06G111100;Cla97C06G116550…	K14489+K14492+K14487+K14503+K14488+K14432+K13449+K14431+K14497+K14496+K13449+K14497+K14492+K14496+K14506+K14516+K14484+K14484+K14488+K14497+K14497+K14487+K14499+K13464+K14516+K14484+K14484+K14496+K13464+K14490+K14497+K13464+K14492+K14432+K14490+K13464+K14493+K14496+K14508+K14496+K14488+K14488+K14488+K14496+K14484
Carbon metabolism	ko01200	38	230	460	4382	Cla97C01G006480;Cla97C01G008280;Cla97C01G008870;Cla97C01G009760;Cla97C01G010890;Cla97C01G024660;Cla97C02G042310;Cla97C02G044610;Cla97C02G046130;Cla97C03G054650;Cla97C03G054660;Cla97C03G054690;Cla97C03G055760;Cla97C03G061210;Cla97C03G063270;Cla97C04G071880;Cla97C04G073960;Cla97C04G073970;Cla97C04G076360;Cla97C04G076390;Cla97C04G079010;Cla97C05G086990;Cla97C05G094190;Cla97C05G104530;Cla97C05G107020…	K01807+K01895+K00031+K02437+K00626+K11517+K01807+K00927+K01803+K00134+K00134+K01638+K00605+K19269+K00844+K00261+K03841+K03841+K01754+K01754+K01783+K01006+K05298+K01602+K00161+K00297+K01689+K00855+K02160+K00026+K01810+K00814+K02437+K01610+K01623+K00134+K01610+K05298+K01637
Protein processing in endoplasmic reticulum	ko04141	35	168	460	4382	Cla97C01G000110;Cla97C01G001870;Cla97C02G040810;Cla97C02G043970;Cla97C03G051930;Cla97C03G055230;Cla97C03G055980;Cla97C03G057310;Cla97C03G062120;Cla97C03G067590;Cla97C03G067600;Cla97C03G067620;Cla97C03G067630;Cla97C04G071950;Cla97C04G074210;Cla97C04G075000;Cla97C04G075600;Cla97C05G108440;Cla97C06G119280;Cla97C06G126870;Cla97C07G132150;Cla97C07G132190;Cla97C07G132220;Cla97C07G132280;Cla97C07G132300…	K13993+K09490+K08057+K09584+K13993+K08054+K13993+K10666+K09503+K04079+K04079+K04079+K04079+K13993+K13993+K03283+K09523+K13993+K03283+K13525+K13993+K13993+K13993+K13993+K13993+K08057+K13993+K09487+K09517+K03283+K03283+K03283+K13993+K03283+K09486
Biosynthesis of cofactors	ko01240	29	226	460	4382	Cla97C01G004990;Cla97C01G021010;Cla97C01G022220;Cla97C01G025210;Cla97C02G043390;Cla97C02G049390;Cla97C03G054620;Cla97C04G071820;Cla97C04G074560;Cla97C05G082830;Cla97C05G093450;Cla97C05G093680;Cla97C06G125310;Cla97C06G125330;Cla97C06G126270;Cla97C06G127490;Cla97C07G131150;Cla97C08G153150;Cla97C08G160480;Cla97C09G162500;Cla97C09G166100;Cla97C09G167000;Cla97C09G173710;Cla97C09G183120;Cla97C10G188890…	K01809+K10047+K03809+K14760+K00793+K00128+K00940+K00059+K00002+K08679+K00963+K01809+K00012+K00012+K00966+K00939+K20884+K00012+K00826+K13248+K02303+K00789+K14190+K01955+K06210+K03146+K03809+K00059+K17497
Photosynthesis	ko00195	26	65	460	4382	Cla97C01G009260;Cla97C01G011340;Cla97C01G014340;Cla97C01G015370;Cla97C01G025040;Cla97C02G027560;Cla97C02G027850;Cla97C02G042490;Cla97C03G056340;Cla97C05G081100;Cla97C05G086380;Cla97C05G091900;Cla97C05G096030;Cla97C05G096440;Cla97C06G110700;Cla97C07G137460;Cla97C07G137540;Cla97C07G139940;Cla97C08G146490;Cla97C08G148420;Cla97C08G156800;Cla97C08G161210;Cla97C09G170230;Cla97C10G188950;Cla97C11G216950…	K02694+K14332+K02701+K02716+K02698+K08902+K02636+K02721+K08901+K08901+K02639+K02639+K08901+K02638+K08903+K03541+K02717+K02695+K02113+K03542+K02109+K02723+K02721+K08905+K02699+K03541
Biosynthesis of amino acids	ko01230	25	210	460	4382	Cla97C01G006480;Cla97C01G008870;Cla97C02G027440;Cla97C02G042310;Cla97C02G044610;Cla97C02G045450;Cla97C02G046130;Cla97C02G047990;Cla97C03G054650;Cla97C03G054660;Cla97C03G056090;Cla97C04G076360;Cla97C04G076390;Cla97C04G079010;Cla97C05G086890;Cla97C06G119180;Cla97C06G124730;Cla97C06G127510;Cla97C08G160480;Cla97C09G163470;Cla97C09G167000;Cla97C09G174910;Cla97C10G196410;Cla97C10G202380;Cla97C11G213800	K01807+K00031+K00891+K01807+K00927+K01953+K01803+K05359+K00134+K00134+K01696+K01754+K01754+K01783+K01915+K01620+K01689+K01940+K00826+K00814+K00789+K01438+K00549+K01623+K00134
Glycolysis / Gluconeogenesis	ko00010	24	116	460	4382	Cla97C01G001460;Cla97C01G008280;Cla97C01G013600;Cla97C02G044610;Cla97C02G046130;Cla97C02G049390;Cla97C03G054650;Cla97C03G054660;Cla97C03G063270;Cla97C04G073960;Cla97C04G073970;Cla97C04G074560;Cla97C05G086990;Cla97C05G107020;Cla97C06G124730;Cla97C07G135470;Cla97C08G158730;Cla97C09G163100;Cla97C09G172570;Cla97C10G192070;Cla97C10G202380;Cla97C10G205630;Cla97C11G213800;Cla97C11G220850	K00001+K01895+K00001+K00927+K01803+K00128+K00134+K00134+K00844+K03841+K03841+K00002+K01006+K00161+K01689+K01792+K01810+K14085+K18857+K01610+K01623+K01568+K00134+K01610
Plant-pathogen interaction	ko04626	22	160	460	4382	Cla97C02G031870;Cla97C02G034120;Cla97C02G049250;Cla97C03G063250;Cla97C03G067590;Cla97C03G067600;Cla97C03G067620;Cla97C03G067630;Cla97C05G081060;Cla97C05G081570;Cla97C05G088220;Cla97C05G096910;Cla97C05G102910;Cla97C05G104600;Cla97C06G127530;Cla97C07G135040;Cla97C08G151440;Cla97C08G157760;Cla97C09G179530;Cla97C10G188970;Cla97C10G205450;Cla97C10G205870	K15397+K13449+K13412+K13449+K04079+K04079+K04079+K04079+K05391+K13425+K02183+K15397+K01373+K15397+K13448+K13425+K13412+K09487+K02183+K13448+K13412+K13424
MAPK signaling pathway - plant	ko04016	21	143	460	4382	Cla97C02G034120;Cla97C03G052090;Cla97C03G054620;Cla97C03G058970;Cla97C03G063250;Cla97C03G066470;Cla97C04G073350;Cla97C05G081570;Cla97C05G085160;Cla97C05G088220;Cla97C05G089520;Cla97C05G091070;Cla97C06G116550;Cla97C07G133100;Cla97C07G135040;Cla97C07G140660;Cla97C09G174770;Cla97C09G179530;Cla97C10G205730;Cla97C10G205870;Cla97C11G212910	K13449+K14497+K00940+K14496+K13449+K14497+K14496+K13425+K14516+K02183+K14497+K14497+K14516+K14496+K13425+K14497+K14496+K02183+K14496+K13424+K14496
Carbon fixation in photosynthetic organisms	ko00710	20	67	460	4382	Cla97C01G006480;Cla97C02G042310;Cla97C02G044610;Cla97C02G046130;Cla97C03G054650;Cla97C03G054660;Cla97C04G073960;Cla97C04G073970;Cla97C04G079010;Cla97C05G086990;Cla97C05G094190;Cla97C05G104530;Cla97C07G130520;Cla97C07G136660;Cla97C09G163470;Cla97C10G192070;Cla97C10G202380;Cla97C11G213800;Cla97C11G220850;Cla97C11G225010	K01807+K01807+K00927+K01803+K00134+K00134+K03841+K03841+K01783+K01006+K05298+K01602+K00855+K00026+K00814+K01610+K01623+K00134+K01610+K05298
Amino sugar and nucleotide sugar metabolism	ko00520	20	123	460	4382	Cla97C01G001730;Cla97C01G004990;Cla97C03G063270;Cla97C04G078470;Cla97C05G082830;Cla97C05G086630;Cla97C05G093450;Cla97C05G093680;Cla97C05G100180;Cla97C06G115410;Cla97C06G121340;Cla97C06G125310;Cla97C06G125330;Cla97C06G126270;Cla97C07G138310;Cla97C08G153150;Cla97C08G158730;Cla97C10G194080;Cla97C11G206830;Cla97C11G210990	K01784+K01809+K00844+K13379+K08679+K00975+K00963+K01809+K00975+K00975+K01183+K00012+K00012+K00966+K01784+K00012+K01810+K00770+K17497+K00975
Pentose and glucuronate interconversions	ko00040	18	126	460	4382	Cla97C04G074560;Cla97C04G079010;Cla97C05G082930;Cla97C05G082940;Cla97C05G087810;Cla97C05G093450;Cla97C05G106630;Cla97C06G125310;Cla97C06G125330;Cla97C07G141120;Cla97C08G150600;Cla97C08G153150;Cla97C08G161240;Cla97C09G163490;Cla97C09G167260;Cla97C09G168010;Cla97C09G171500;Cla97C09G179380	K00002+K01783+K01051+K01051+K01051+K00963+K01728+K00012+K00012+K01051+K01728+K00012+K01728+K01051+K01051+K01051+K01051+K01051
Starch and sucrose metabolism	ko00500	17	155	460	4382	Cla97C01G001980;Cla97C01G006710;Cla97C01G018360;Cla97C03G051130;Cla97C03G051750;Cla97C03G058540;Cla97C03G063270;Cla97C03G064990;Cla97C04G072460;Cla97C05G086630;Cla97C05G093450;Cla97C05G100180;Cla97C05G101490;Cla97C06G115410;Cla97C08G153950;Cla97C08G158730;Cla97C11G210990	K01179+K01179+K01087+K01087+K05349+K16055+K00844+K00695+K00705+K00975+K00963+K00975+K01176+K00975+K01087+K01810+K00975
Glutathione metabolism	ko00480	16	80	460	4382	Cla97C01G008870;Cla97C02G040260;Cla97C02G040270;Cla97C03G060050;Cla97C04G074140;Cla97C04G074250;Cla97C04G074290;Cla97C04G079260;Cla97C04G079270;Cla97C05G088420;Cla97C05G091060;Cla97C06G123950;Cla97C06G126520;Cla97C07G137340;Cla97C08G157490;Cla97C11G220240	K00031+K01255+K01255+K00799+K00799+K00799+K00799+K00799+K00799+K11188+K00797+K00799+K00797+K00799+K00799+K00434
Ribosome	ko03010	15	284	460	4382	Cla97C01G023610;Cla97C02G039440;Cla97C03G053510;Cla97C05G104480;Cla97C06G109810;Cla97C06G121870;Cla97C09G164070;Cla97C09G180520;Cla97C10G190280;Cla97C10G192140;Cla97C10G196930;Cla97C10G206310;Cla97C11G214040;Cla97C11G223230;Cla97C11G223270	K02914+K02864+K02939+K02876+K02906+K02916+K02961+K02935+K02895+K02904+K02935+K02879+K02899+K02874+K02871+K02950
alpha-Linolenic acid metabolism	ko00592	15	52	460	4382	Cla97C02G032420;Cla97C02G049640;Cla97C02G049650;Cla97C02G049660;Cla97C02G049680;Cla97C02G049690;Cla97C03G060720;Cla97C03G065380;Cla97C06G114510;Cla97C06G117350;Cla97C06G123370;Cla97C09G163060;Cla97C09G172570;Cla97C11G208800;Cla97C11G212320	K01723+K00454+K00454+K00454+K00454+K00454+K10525+K05894+K10527+K07513+K01047+K00454+K18857+K10527+K10525
Pyruvate metabolism	ko00620	15	95	460	4382	Cla97C01G001460;Cla97C01G008280;Cla97C01G010890;Cla97C01G013600;Cla97C02G049390;Cla97C03G054690;Cla97C04G074560;Cla97C05G086990;Cla97C05G107020;Cla97C07G134750;Cla97C07G136660;Cla97C09G163100;Cla97C09G172570;Cla97C10G192070;Cla97C11G220850	K00001+K01895+K00626+K00001+K00128+K01638+K00002+K01006+K00161+K02160+K00026+K14085+K18857+K01610+K01610
Photosynthesis - antenna proteins	ko00196	14	19	460	4382	Cla97C01G024330;Cla97C01G024340;Cla97C02G029240;Cla97C02G044270;Cla97C03G062230;Cla97C04G073760;Cla97C04G079070;Cla97C06G125710;Cla97C08G146000;Cla97C08G149600;Cla97C09G182070;Cla97C10G190440;Cla97C10G194600;Cla97C10G205320	K08912+K08912+K08913+K08912+K08909+K08915+K08910+K08910+K08916+K08917+K08907+K08914+K08912+K08915
Phenylpropanoid biosynthesis	ko00940	13	179	460	4382	Cla97C02G033050;Cla97C02G033110;Cla97C02G045070;Cla97C02G049890;Cla97C03G051750;Cla97C04G070210;Cla97C05G088420;Cla97C07G130540;Cla97C07G136120;Cla97C07G144540;Cla97C09G177060;Cla97C09G177290;Cla97C09G180150	K23260+K23260+K00430+K00430+K05349+K00430+K11188+K01904+K12356+K13066+K00430+K00430+K00430
Phagosome	ko04145	12	67	460	4382	Cla97C01G017210;Cla97C02G036250;Cla97C02G037530;Cla97C02G040810;Cla97C03G055230;Cla97C03G059560;Cla97C03G062790;Cla97C07G138500;Cla97C08G157820;Cla97C10G193030;Cla97C10G204950;Cla97C11G208770	K07374+K04392+K04392+K08057+K08054+K07375+K07375+K08057+K07375+K07374+K07375+K04392
Ascorbate and aldarate metabolism	ko00053	12	59	460	4382	Cla97C01G021010;Cla97C02G049390;Cla97C03G064210;Cla97C03G064220;Cla97C04G074560;Cla97C05G082830;Cla97C06G125310;Cla97C06G125330;Cla97C08G153150;Cla97C09G163100;Cla97C09G173710;Cla97C11G220240	K10047+K00128+K00423+K00423+K00002+K08679+K00012+K00012+K00012+K14085+K14190+K00434
Cysteine and methionine metabolism	ko00270	12	97	460	4382	Cla97C01G001520;Cla97C03G064170;Cla97C04G073140;Cla97C05G086940;Cla97C05G091060;Cla97C06G115890;Cla97C06G126520;Cla97C07G136660;Cla97C08G160480;Cla97C09G167000;Cla97C10G196410;Cla97C11G223810	K01761+K00558+K00827+K01611+K00797+K00547+K00797+K00026+K00826+K00789+K00549+K00815
Fatty acid degradation	ko00071	12	47	460	4382	Cla97C01G001460;Cla97C01G010890;Cla97C01G013600;Cla97C02G029500;Cla97C02G049390;Cla97C06G112610;Cla97C06G114510;Cla97C06G117350;Cla97C09G163100;Cla97C09G172570;Cla97C09G179150;Cla97C11G208800	K00001+K00626+K00001+K01897+K00128+K01897+K10527+K07513+K14085+K18857+K01897+K10527
Glyoxylate and dicarboxylate metabolism	ko00630	11	66	460	4382	Cla97C01G008280;Cla97C01G009760;Cla97C01G010890;Cla97C01G024660;Cla97C03G054690;Cla97C03G055760;Cla97C03G061210;Cla97C05G086890;Cla97C05G104530;Cla97C07G136660;Cla97C09G175040	K01895+K02437+K00626+K11517+K01638+K00605+K19269+K01915+K01602+K00026+K02437+K01637
Glycine, serine and threonine metabolism	ko00260	11	67	460	4382	Cla97C01G003780;Cla97C01G009760;Cla97C03G055760;Cla97C03G056090;Cla97C04G073140;Cla97C04G076360;Cla97C04G076390;Cla97C06G115610;Cla97C06G119180;Cla97C09G163100;Cla97C09G175040	K00276+K02437+K00605+K01696+K00827+K01754+K01754+K00276+K01620+K14085+K02437
Endocytosis	ko04144	11	136	460	4382	Cla97C01G016210;Cla97C02G033250;Cla97C04G075000;Cla97C05G084730;Cla97C06G119280;Cla97C07G139470;Cla97C08G157530;Cla97C09G172860;Cla97C09G181360;Cla97C09G181410;Cla97C11G217390	K07937+K07937+K03283+K05758+K03283+K01115+K01115+K03283+K03283+K03283+K03283
Fatty acid metabolism	ko01212	11	65	460	4382	Cla97C01G010890;Cla97C02G029500;Cla97C04G071820;Cla97C05G108360;Cla97C06G112610;Cla97C06G114510;Cla97C06G117350;Cla97C07G134750;Cla97C09G179150;Cla97C10G196140;Cla97C11G208800	K00626+K01897+K00059+K10251+K01897+K10527+K07513+K02160+K01897+K00059+K10527
Linoleic acid metabolism	ko00591	9	28	460	4382	Cla97C02G041430;Cla97C02G041470;Cla97C02G049640;Cla97C02G049650;Cla97C02G049660;Cla97C02G049680;Cla97C02G049690;Cla97C06G123370;Cla97C09G163060	K15718+K15718+K00454+K00454+K00454+K00454+K00454+K01047+K00454
Glycerophospholipid metabolism	ko00564	9	91	460	4382	Cla97C02G032310;Cla97C06G113090;Cla97C06G123370;Cla97C06G123790;Cla97C06G123800;Cla97C06G127710;Cla97C07G139470;Cla97C07G142290;Cla97C08G157530	K13513+K13508+K01047+K05929+K05929+K01114+K01115+K18696+K01115
Fructose and mannose metabolism	ko00051	9	50	460	4382	Cla97C01G004990;Cla97C02G046130;Cla97C03G063270;Cla97C04G073960;Cla97C04G073970;Cla97C05G093680;Cla97C06G126270;Cla97C10G202380;Cla97C11G206830	K01809+K01803+K00844+K03841+K03841+K01809+K00966+K01623+K17497
Galactose metabolism	ko00052	9	49	460	4382	Cla97C01G001730;Cla97C01G010580;Cla97C03G063270;Cla97C04G070460;Cla97C05G093450;Cla97C07G138310;Cla97C09G167400;Cla97C10G194470;Cla97C11G218690	K01784+K18819+K00844+K06617+K00963+K01784+K06611+K18819+K07407
Peroxisome	ko04146	9	77	460	4382	Cla97C01G008870;Cla97C01G024660;Cla97C02G029500;Cla97C02G047680;Cla97C06G112610;Cla97C06G117350;Cla97C09G179150;Cla97C10G193470;Cla97C10G193950	K00031+K11517+K01897+K04565+K01897+K07513+K01897+K13348+K08726
Purine metabolism	ko00230	9	85	460	4382	Cla97C01G002730;Cla97C01G004020;Cla97C03G054620;Cla97C04G073560;Cla97C05G099770;Cla97C06G116050;Cla97C06G127490;Cla97C10G187450;Cla97C10G193760	K01951+K00759+K00940+K01490+K13811+K13811+K00939+K00759+K19964
Valine, leucine and isoleucine degradation	ko00280	8	48	460	4382	Cla97C01G010890;Cla97C02G049390;Cla97C04G073140;Cla97C05G087770;Cla97C06G117350;Cla97C08G146990;Cla97C08G160480;Cla97C09G163100	K00626+K00128+K00827+K09699+K07513+K00166+K00826+K14085
Diterpenoid biosynthesis	ko00904	8	21	460	4382	Cla97C01G005520;Cla97C03G058120;Cla97C05G101100;Cla97C06G109980;Cla97C07G128590;Cla97C07G137160;Cla97C09G164590;Cla97C10G194450	K05282+K04125+K04122+K04123+K04120+K04125+K04124+K04125
Tyrosine metabolism	ko00350	8	51	460	4382	Cla97C01G001460;Cla97C01G003780;Cla97C01G013600;Cla97C03G057140;Cla97C06G115610;Cla97C07G136610;Cla97C09G172570;Cla97C11G223810	K00001+K00276+K00001+K00422+K00276+K00451+K18857+K00815
Porphyrin and chlorophyll metabolism	ko00860	8	52	460	4382	Cla97C01G003360;Cla97C02G043280;Cla97C04G068530;Cla97C04G071470;Cla97C05G087230;Cla97C08G149000;Cla97C09G166100;Cla97C11G224300	K22013+K00218+K03403+K04035+K19073+K22013+K02303+K00218
Spliceosome	ko03040	7	151	460	4382	Cla97C04G075000;Cla97C06G119280;Cla97C09G172860;Cla97C09G181360;Cla97C09G181410;Cla97C10G200740;Cla97C11G217390	K03283+K03283+K03283+K03283+K03283+K12900+K03283
Pentose phosphate pathway	ko00030	7	48	460	4382	Cla97C01G006480;Cla97C02G042310;Cla97C04G073960;Cla97C04G073970;Cla97C04G079010;Cla97C08G158730;Cla97C10G202380	K01807+K01807+K03841+K03841+K01783+K01810+K01623
Alanine, aspartate and glutamate metabolism	ko00250	7	57	460	4382	Cla97C02G045450;Cla97C04G071880;Cla97C04G073140;Cla97C05G086890;Cla97C06G127510;Cla97C09G163470;Cla97C09G183120	K01953+K00261+K00827+K01915+K01940+K00814+K01955
Fatty acid biosynthesis	ko00061	7	40	460	4382	Cla97C02G029500;Cla97C04G071820;Cla97C06G112610;Cla97C07G134750;Cla97C09G171590;Cla97C09G179150;Cla97C10G196140	K01897+K00059+K01897+K02160+K10782+K01897+K00059
Terpenoid backbone biosynthesis	ko00900	6	50	460	4382	Cla97C01G010890;Cla97C02G036600;Cla97C06G118020;Cla97C06G122390;Cla97C08G156390;Cla97C10G191240	K00626+K00021+K15889+K01662+K01662+K00991
Glycerolipid metabolism	ko00561	6	65	460	4382	Cla97C02G032310;Cla97C02G049390;Cla97C04G074560;Cla97C06G113090;Cla97C09G163100;Cla97C11G218690	K13513+K00128+K00002+K13508+K14085+K07407
ABC transporters	ko02010	6	24	460	4382	Cla97C01G025090;Cla97C09G168520;Cla97C09G174450;Cla97C09G179710;Cla97C09G180000;Cla97C11G219090	K05666+K05666+K05658+K05658+K05658+K05658
Nitrogen metabolism	ko00910	6	36	460	4382	Cla97C03G060420;Cla97C04G071880;Cla97C05G086890;Cla97C08G154780;Cla97C10G197000;Cla97C10G201950	K10534+K00261+K01915+K01673+K01673+K01674
Cyanoamino acid metabolism	ko00460	6	58	460	4382	Cla97C03G051750;Cla97C09G163570;Cla97C11G218190;Cla97C11G218210;Cla97C11G218230;Cla97C11G218280	K05349+K08248+K08248+K08248+K08248+K08248
Propanoate metabolism	ko00640	5	34	460	4382	Cla97C01G008280;Cla97C01G010890;Cla97C05G087770;Cla97C07G134750;Cla97C08G146990	K01895+K00626+K09699+K02160+K00166
Citrate cycle (TCA cycle)	ko00020	5	46	460	4382	Cla97C01G008870;Cla97C05G107020;Cla97C07G136660;Cla97C10G192070;Cla97C11G220850	K00031+K00161+K00026+K01610+K01610
Cutin, suberine and wax biosynthesis	ko00073	5	30	460	4382	Cla97C01G021750;Cla97C05G083340;Cla97C06G110030;Cla97C06G127850;Cla97C11G214740	K21995+K15404+K15404+K15400+K15400
Ubiquinone and other terpenoid-quinone biosynthesis	ko00130	5	54	460	4382	Cla97C01G022220;Cla97C01G025210;Cla97C07G130540;Cla97C10G190050;Cla97C11G223810	K03809+K14760+K01904+K03809+K00815
Arginine and proline metabolism	ko00330	5	53	460	4382	Cla97C02G049390;Cla97C05G086940;Cla97C05G091060;Cla97C06G126520;Cla97C09G163100	K00128+K01611+K00797+K00797+K14085
Arginine biosynthesis	ko00220	5	40	460	4382	Cla97C04G071880;Cla97C05G086890;Cla97C06G127510;Cla97C09G163470;Cla97C09G174910	K00261+K01915+K01940+K00814+K01438
Carotenoid biosynthesis	ko00906	5	31	460	4382	Cla97C01G002480;Cla97C01G024630;Cla97C07G137260;Cla97C07G137780;Cla97C10G193770	K15746+K09840+K09840+K09840+K14593
Tropane, piperidine and pyridine alkaloid biosynthesis	ko00960	4	25	460	4382	Cla97C01G003780;Cla97C06G115610;Cla97C10G204620;Cla97C11G223810	K00276+K00276+K08081+K00815
RNA degradation	ko03018	4	87	460	4382	Cla97C03G063300;Cla97C03G064830;Cla97C06G124730;Cla97C10G196770	K03678+K04077+K01689+K00962
Ubiquitin mediated proteolysis	ko04120	4	101	460	4382	Cla97C04G076210;Cla97C05G098460;Cla97C08G149090;Cla97C09G168910	K10144+K10144+K03875+K10144
Sphingolipid metabolism	ko00600	4	26	460	4382	Cla97C03G057250;Cla97C05G086640;Cla97C06G111390;Cla97C11G218690	K04712+K04708+K01634+K07407
Ribosome biogenesis in eukaryotes	ko03008	4	78	460	4382	Cla97C02G026500;Cla97C03G066690;Cla97C06G123270;Cla97C07G143970	K03264+K14521+K14558+K14550
Lysine degradation	ko00310	4	23	460	4382	Cla97C01G010890;Cla97C02G049390;Cla97C03G064950;Cla97C09G163100	K00626+K00128+K14157+K14085
mRNA surveillance pathway	ko03015	4	96	460	4382	Cla97C05G082440;Cla97C07G144430;Cla97C08G156170;Cla97C11G209130	K14324+K14396+K11584+K11584
Ether lipid metabolism	ko00565	4	22	460	4382	Cla97C06G123370;Cla97C06G127710;Cla97C07G139470;Cla97C08G157530	K01047+K01114+K01115+K01115
Inositol phosphate metabolism	ko00562	4	63	460	4382	Cla97C01G021010;Cla97C02G046130;Cla97C06G127710;Cla97C09G178670	K10047+K01803+K01114+K00913
Phosphatidylinositol signaling system	ko04070	4	54	460	4382	Cla97C01G021010;Cla97C05G088220;Cla97C09G178670;Cla97C09G179530	K10047+K02183+K00913+K02183
Fatty acid elongation	ko00062	4	25	460	4382	Cla97C02G031870;Cla97C05G096910;Cla97C05G104600;Cla97C05G108360	K15397+K15397+K15397+K10251
Thiamine metabolism	ko00730	4	22	460	4382	Cla97C06G122390;Cla97C06G127490;Cla97C08G156390;Cla97C10G189870	K01662+K00939+K01662+K03146
Phenylalanine, tyrosine and tryptophan biosynthesis	ko00400	4	47	460	4382	Cla97C02G027440;Cla97C02G047990;Cla97C03G056090;Cla97C11G223810	K00891+K05359+K01696+K00815
Oxidative phosphorylation	ko00190	4	139	460	4382	Cla97C01G019080;Cla97C04G078000;Cla97C08G146490;Cla97C08G156800	K01507+K03966+K02113+K02109
Tryptophan metabolism	ko00380	4	43	460	4382	Cla97C01G010890;Cla97C02G049390;Cla97C07G144540;Cla97C09G163100	K00626+K00128+K13066+K14085
2-Oxocarboxylic acid metabolism	ko01210	4	44	460	4382	Cla97C01G008870;Cla97C08G160480;Cla97C09G163470;Cla97C09G174910	K00031+K00826+K00814+K01438
Sulfur metabolism	ko00920	4	34	460	4382	Cla97C05G099770;Cla97C06G112620;Cla97C06G116050;Cla97C11G224510	K13811+K17285+K13811+K01082
beta-Alanine metabolism	ko00410	4	40	460	4382	Cla97C01G003780;Cla97C02G049390;Cla97C06G115610;Cla97C09G163100	K00276+K00128+K00276+K14085
Selenocompound metabolism	ko00450	4	17	460	4382	Cla97C01G001520;Cla97C05G099770;Cla97C06G116050;Cla97C10G196410	K01761+K13811+K13811+K00549
Isoquinoline alkaloid biosynthesis	ko00950	4	28	460	4382	Cla97C01G003780;Cla97C03G057140;Cla97C06G115610;Cla97C11G223810	K00276+K00422+K00276+K00815
Zeatin biosynthesis	ko00908	3	26	460	4382	Cla97C04G070780;Cla97C06G115310;Cla97C07G128470	K00279+K10760+K10760
Valine, leucine and isoleucine biosynthesis	ko00290	3	16	460	4382	Cla97C04G076360;Cla97C04G076390;Cla97C08G160480	K01754+K01754+K00826
Phenylalanine metabolism	ko00360	3	46	460	4382	Cla97C01G003780;Cla97C06G115610;Cla97C11G223810	K00276+K00276+K00815
Pyrimidine metabolism	ko00240	3	48	460	4382	Cla97C03G054620;Cla97C08G158740;Cla97C09G183120	K00940+K01520+K01955
Base excision repair	ko03410	3	38	460	4382	Cla97C01G019000;Cla97C05G100700;Cla97C05G107130	K01247+K01246+K03512
Biotin metabolism	ko00780	2	14	460	4382	Cla97C04G071820;Cla97C10G196140	K00059+K00059
Vitamin B6 metabolism	ko00750	2	16	460	4382	Cla97C01G000180;Cla97C09G162500	K05275+K13248
Riboflavin metabolism	ko00740	2	15	460	4382	Cla97C02G043390;Cla97C07G131150	K00793+K20884
RNA transport	ko03013	2	144	460	4382	Cla97C05G082440;Cla97C09G173550	K14324+K03113
One carbon pool by folate	ko00670	2	18	460	4382	Cla97C03G055760;Cla97C06G118090	K00605+K00297
Histidine metabolism	ko00340	2	19	460	4382	Cla97C02G049390;Cla97C09G163100	K00128+K14085
Isoflavonoid biosynthesis	ko00943	2	4	460	4382	Cla97C01G016270;Cla97C02G034860	K13260+K13260
Circadian rhythm - plant	ko04712	2	34	460	4382	Cla97C05G098160;Cla97C08G156620	K16241+K16241
Other glycan degradation	ko00511	2	18	460	4382	Cla97C01G001320;Cla97C05G092720	K01206+K15923
Nicotinate and nicotinamide metabolism	ko00760	2	19	460	4382	Cla97C01G007630;Cla97C10G188890	K18551+K06210
Flavone and flavonol biosynthesis	ko00944	2	8	460	4382	Cla97C06G125240;Cla97C10G202920	K05280+K22771
Monobactam biosynthesis	ko00261	2	8	460	4382	Cla97C05G099770;Cla97C06G116050	K13811+K13811
Steroid biosynthesis	ko00100	2	25	460	4382	Cla97C01G024490;Cla97C05G094950	K09832+K01052
Protein export	ko03060	2	45	460	4382	Cla97C01G001870;Cla97C11G209430	K09490+K13280
Pantothenate and CoA biosynthesis	ko00770	2	29	460	4382	Cla97C02G049390;Cla97C08G160480	K00128+K00826
Biosynthesis of unsaturated fatty acids	ko01040	2	21	460	4382	Cla97C05G108360;Cla97C06G117350	K10251+K07513
Mismatch repair	ko03430	2	31	460	4382	Cla97C06G125140;Cla97C08G146460	K07466+K08734
Arachidonic acid metabolism	ko00590	2	17	460	4382	Cla97C06G123370;Cla97C10G193950	K01047+K08726
Butanoate metabolism	ko00650	1	23	460	4382	Cla97C01G010890	K00626
Synthesis and degradation of ketone bodies	ko00072	1	5	460	4382	Cla97C01G010890	K00626
Non-homologous end-joining	ko03450	1	8	460	4382	Cla97C05G107130	K03512
Flavonoid biosynthesis	ko00941	1	27	460	4382	Cla97C06G125240	K05280
Glycosphingolipid biosynthesis - globo and isoglobo series	ko00603	1	10	460	4382	Cla97C11G218690	K07407
Various types of N-glycan biosynthesis	ko00513	1	30	460	4382	Cla97C03G060320	K03842
Homologous recombination	ko03440	1	44	460	4382	Cla97C06G125140	K07466
N-Glycan biosynthesis	ko00510	1	41	460	4382	Cla97C03G060320	K03842
DNA replication	ko03030	1	40	460	4382	Cla97C06G125140	K07466
Nucleotide excision repair	ko03420	1	50	460	4382	Cla97C06G125140	K07466
Glucosinolate biosynthesis	ko00966	1	4	460	4382	Cla97C08G160480	K00826
Limonene and pinene degradation	ko00903	1	7	460	4382	Cla97C02G049390	K00128
Brassinosteroid biosynthesis	ko00905	1	13	460	4382	Cla97C09G162570	K12638
RNA polymerase	ko03020	1	54	460	4382	Cla97C05G088090	K03017
Glycosaminoglycan degradation	ko00531	1	18	460	4382	Cla97C06G126300	K01205
Sesquiterpenoid and triterpenoid biosynthesis	ko00909	1	26	460	4382	Cla97C09G163860	K15820

## Sheet: Rs 0 d vs. Rs 3 d
#KEGG_n	610	KEGG_N	4382
#Pathway	ko_ID	DEgene	gene	DEgene_all	gene_all
Plant hormone signal transduction	ko04075	66	241	610	4382	Cla97C01G007850;Cla97C01G011610;Cla97C01G016200;Cla97C01G016350;Cla97C01G017970;Cla97C01G023770;Cla97C02G031020;Cla97C02G031360;Cla97C02G031370;Cla97C02G032990;Cla97C02G034010;Cla97C02G034120;Cla97C02G042420;Cla97C02G048210;Cla97C03G052090;Cla97C03G058970;Cla97C03G065120;Cla97C03G066470;Cla97C04G071100;Cla97C04G073350;Cla97C04G073700;Cla97C05G080550;Cla97C05G085700;Cla97C05G089520;Cla97C05G091070…	K14492+K14431+K14505+K14487+K14498+K14502+K13946+K14488+K14488+K14432+K13449+K13449+K14484+K14431+K14497+K14496+K13464+K14497+K14492+K14496+K13946+K14488+K14484+K14497+K14497+K14505+K14487+K14486+K14505+K13464+K14484+K14484+K14494+K14504+K14484+K14516+K14502+K14496+K13464+K14431+K14487+K14490+K14497+K13464+K14499+K13464+K14484+K14509+K14485+K14493+K14484+K14484+K13422+K14496+K13422+K14498+K14496+…
Phenylpropanoid biosynthesis	ko00940	40	179	610	4382	Cla97C01G001290;Cla97C01G016570;Cla97C01G020000;Cla97C01G025380;Cla97C02G033110;Cla97C02G034290;Cla97C02G049920;Cla97C02G049930;Cla97C02G049940;Cla97C03G054720;Cla97C03G055510;Cla97C03G055890;Cla97C03G056070;Cla97C03G059200;Cla97C03G060710;Cla97C04G070210;Cla97C04G077580;Cla97C05G088420;Cla97C06G119520;Cla97C06G123590;Cla97C07G144420;Cla97C07G144540;Cla97C08G153160;Cla97C09G177060;Cla97C09G178920…	K00083+K00430+K00430+K22395+K23260+K01904+K00430+K00430+K00430+K01904+K01054+K00430+K05350+K00430+K01054+K00430+K05350+K11188+K12355+K05349+K00430+K13066+K01188+K00430+K00430+K00430+K00430+K13066+K13066+K18368+K01054+K09753+K05349+K09754+K00430+K00487+K01904+K00588+K00588+K05350
Starch and sucrose metabolism	ko00500	39	155	610	4382	Cla97C01G001430;Cla97C01G001950;Cla97C01G006680;Cla97C01G009060;Cla97C01G009200;Cla97C01G018360;Cla97C02G045770;Cla97C03G056070;Cla97C03G058540;Cla97C03G062630;Cla97C03G064990;Cla97C04G072460;Cla97C04G072470;Cla97C04G077580;Cla97C04G079520;Cla97C05G084480;Cla97C05G089120;Cla97C05G093450;Cla97C05G099630;Cla97C05G101490;Cla97C06G110160;Cla97C06G117180;Cla97C06G123430;Cla97C06G123590;Cla97C07G130930…	K13679+K01194+K01835+K19891+K01187+K01087+K00688+K05350+K16055+K19892+K00695+K00705+K00705+K05350+K00695+K01177+K01087+K00963+K00844+K01176+K00847+K01177+K01214+K05349+K16055+K01179+K01179+K01188+K01810+K01179+K01214+K00700+K01177+K01179+K05349+K00703+K01179+K00696+K05350
Carbon metabolism	ko01200	38	230	610	4382	Cla97C01G005290;Cla97C01G008870;Cla97C01G009760;Cla97C01G016620;Cla97C02G036270;Cla97C02G037100;Cla97C02G042310;Cla97C02G042820;Cla97C03G054690;Cla97C03G063130;Cla97C03G066480;Cla97C04G073960;Cla97C04G076360;Cla97C04G076390;Cla97C04G076520;Cla97C05G086990;Cla97C05G088360;Cla97C05G099630;Cla97C05G104530;Cla97C05G107020;Cla97C06G113030;Cla97C06G125180;Cla97C07G131010;Cla97C07G134750;Cla97C07G134850…	K00851+K00031+K02437+K01455+K00232+K01803+K01807+K00131+K01638+K00830+K00029+K03841+K01754+K01754+K00873+K01006+K00382+K00844+K01602+K00161+K13034+K01079+K14455+K02160+K01601+K00232+K11517+K00261+K03781+K00121+K00121+K00600+K01810+K01610+K00873+K00927+K01623+K00134
Biosynthesis of cofactors	ko01240	35	226	610	4382	Cla97C01G018740;Cla97C01G021010;Cla97C01G022220;Cla97C02G042440;Cla97C02G045650;Cla97C02G049390;Cla97C04G069600;Cla97C04G076520;Cla97C05G082830;Cla97C05G088360;Cla97C05G088630;Cla97C05G093450;Cla97C05G093680;Cla97C06G117670;Cla97C06G125310;Cla97C06G125330;Cla97C06G127490;Cla97C07G131150;Cla97C07G135200;Cla97C08G147910;Cla97C08G153150;Cla97C08G154940;Cla97C08G160480;Cla97C08G161570;Cla97C09G162530…	K03809+K10047+K03809+K00128+K03809+K00128+K17872+K00873+K08679+K00382+K19222+K00963+K01809+K08679+K00012+K00012+K00939+K20884+K22912+K14652+K00012+K00600+K00826+K23095+K13248+K02303+K00789+K00949+K14190+K06210+K03809+K00873+K00002+K00966+K00457
Biosynthesis of amino acids	ko01230	33	210	610	4382	Cla97C01G008870;Cla97C01G011860;Cla97C01G011870;Cla97C01G018010;Cla97C02G027440;Cla97C02G037100;Cla97C02G042310;Cla97C02G042740;Cla97C03G054790;Cla97C03G054820;Cla97C03G056090;Cla97C04G076360;Cla97C04G076390;Cla97C04G076520;Cla97C06G113030;Cla97C06G125180;Cla97C06G127510;Cla97C07G131010;Cla97C08G152630;Cla97C08G154180;Cla97C08G154940;Cla97C08G160480;Cla97C09G167000;Cla97C09G174910;Cla97C09G179000…	K00031+K05359+K05359+K01626+K00891+K01803+K01807+K01620+K01940+K01940+K01696+K01754+K01754+K00873+K13034+K01079+K01940+K14455+K01953+K01626+K00600+K00826+K00789+K01438+K00145+K00873+K00549+K22846+K00927+K00620+K01623+K01850+K00134
MAPK signaling pathway - plant	ko04016	31	143	610	4382	Cla97C01G017970;Cla97C01G020280;Cla97C02G034010;Cla97C02G034120;Cla97C02G050380;Cla97C03G052090;Cla97C03G053010;Cla97C03G058970;Cla97C03G066470;Cla97C03G067430;Cla97C04G073350;Cla97C04G077280;Cla97C05G081570;Cla97C05G089520;Cla97C05G091070;Cla97C05G096750;Cla97C07G129280;Cla97C07G133100;Cla97C07G135040;Cla97C07G140660;Cla97C08G152180;Cla97C09G168000;Cla97C09G174730;Cla97C09G174770;Cla97C09G179530…	K14498+K20547+K13449+K13449+K02183+K14497+K20536+K14496+K14497+K13447+K14496+K20604+K13425+K14497+K14497+K20718+K14516+K14496+K13425+K14497+K03781+K14509+K13422+K14496+K02183+K13422+K14498+K14496+K13424+K13447+K14496
Protein processing in endoplasmic reticulum	ko04141	31	168	610	4382	Cla97C01G000110;Cla97C01G007690;Cla97C01G008920;Cla97C02G033390;Cla97C02G035700;Cla97C03G051930;Cla97C03G051940;Cla97C03G055980;Cla97C03G057310;Cla97C03G062120;Cla97C04G071950;Cla97C04G074210;Cla97C05G099440;Cla97C05G108440;Cla97C06G119280;Cla97C07G132150;Cla97C07G132190;Cla97C07G132220;Cla97C07G132280;Cla97C07G132300;Cla97C07G132310;Cla97C07G139440;Cla97C07G141250;Cla97C08G145950;Cla97C09G172860…	K13993+K09487+K13993+K13993+K09487+K13993+K13993+K13993+K10666+K09503+K13993+K13993+K13993+K13993+K03283+K13993+K13993+K13993+K13993+K13993+K13993+K13993+K13993+K13993+K03283+K03283+K13993+K13993+K07953+K03283+K09580
Amino sugar and nucleotide sugar metabolism	ko00520	30	123	610	4382	Cla97C01G001730;Cla97C01G003100;Cla97C01G006680;Cla97C01G009110;Cla97C01G020280;Cla97C04G078470;Cla97C05G082830;Cla97C05G093450;Cla97C05G093680;Cla97C05G099630;Cla97C06G110160;Cla97C06G117670;Cla97C06G121340;Cla97C06G121360;Cla97C06G123410;Cla97C06G125310;Cla97C06G125330;Cla97C07G135500;Cla97C07G136830;Cla97C07G138310;Cla97C07G142990;Cla97C08G153150;Cla97C08G155830;Cla97C08G158730;Cla97C09G171410…	K01784+K01784+K01835+K12448+K20547+K13379+K08679+K00963+K01809+K00844+K00847+K08679+K01183+K01183+K18677+K00012+K00012+K01711+K12450+K01784+K13379+K00012+K12450+K01810+K13648+K15920+K00770+K12373+K00966+K12373
Plant-pathogen interaction	ko04626	29	160	610	4382	Cla97C01G007690;Cla97C01G023300;Cla97C02G031690;Cla97C02G031870;Cla97C02G034010;Cla97C02G034120;Cla97C02G035700;Cla97C02G046650;Cla97C02G049250;Cla97C02G050380;Cla97C03G053010;Cla97C03G067430;Cla97C05G081050;Cla97C05G081060;Cla97C05G081070;Cla97C05G081570;Cla97C05G091040;Cla97C05G100760;Cla97C05G102910;Cla97C05G104600;Cla97C06G119920;Cla97C06G127530;Cla97C07G135040;Cla97C07G142250;Cla97C09G179530…	K09487+K13433+K01373+K15397+K13449+K13449+K09487+K15397+K13412+K02183+K20536+K13447+K05391+K05391+K05391+K13425+K05391+K13448+K01373+K15397+K15397+K13448+K13425+K13412+K02183+K13448+K13412+K13424+K13447
Glycolysis / Gluconeogenesis	ko00010	28	116	610	4382	Cla97C01G006680;Cla97C01G013600;Cla97C01G023480;Cla97C02G037100;Cla97C02G042440;Cla97C02G042820;Cla97C02G049390;Cla97C04G073960;Cla97C04G076520;Cla97C05G081320;Cla97C05G086990;Cla97C05G088360;Cla97C05G099630;Cla97C05G107020;Cla97C06G123720;Cla97C08G152400;Cla97C08G152410;Cla97C08G158730;Cla97C09G163100;Cla97C09G172570;Cla97C10G192070;Cla97C10G193010;Cla97C10G197800;Cla97C10G203340;Cla97C10G205630…	K01835+K00001+K01568+K01803+K00128+K00131+K00128+K03841+K00873+K01792+K01006+K00382+K00844+K00161+K01785+K00121+K00121+K01810+K14085+K18857+K01610+K00873+K01785+K00927+K01568+K00002+K01623+K00134
Pentose and glucuronate interconversions	ko00040	25	126	610	4382	Cla97C01G006690;Cla97C03G054380;Cla97C03G067530;Cla97C04G076160;Cla97C05G082930;Cla97C05G082940;Cla97C05G084240;Cla97C05G087810;Cla97C05G093450;Cla97C05G103030;Cla97C05G106630;Cla97C06G117330;Cla97C06G125310;Cla97C06G125330;Cla97C07G135870;Cla97C08G150600;Cla97C08G153150;Cla97C08G161240;Cla97C09G163490;Cla97C09G164920;Cla97C09G167260;Cla97C09G168010;Cla97C09G171500;Cla97C09G179380;Cla97C10G205900	K01051+K01728+K01051+K01728+K01051+K01051+K01728+K01051+K00963+K01728+K01728+K01728+K00012+K00012+K01051+K01728+K00012+K01728+K01051+K01213+K01051+K01051+K01051+K01051+K00002
alpha-Linolenic acid metabolism	ko00592	21	52	610	4382	Cla97C02G028490;Cla97C02G032420;Cla97C02G036270;Cla97C02G049640;Cla97C02G049650;Cla97C02G049690;Cla97C03G060720;Cla97C05G084200;Cla97C05G096310;Cla97C05G100160;Cla97C06G114510;Cla97C07G136380;Cla97C09G163060;Cla97C09G170510;Cla97C09G171430;Cla97C09G171450;Cla97C09G172570;Cla97C11G208800;Cla97C11G214710;Cla97C11G214950;Cla97C11G219830	K10528+K01723+K00232+K00454+K00454+K00454+K10525+K07513+K10526+K08241+K10527+K00232+K00454+K00454+K00224+K00224+K18857+K10527+K22389+K05894+K00454
Phagosome	ko04145	20	67	610	4382	Cla97C01G002830;Cla97C01G008480;Cla97C01G017210;Cla97C02G037530;Cla97C02G050600;Cla97C03G059560;Cla97C03G062790;Cla97C03G067740;Cla97C04G073920;Cla97C05G095370;Cla97C05G098290;Cla97C07G141280;Cla97C08G157720;Cla97C08G157820;Cla97C08G158010;Cla97C08G158020;Cla97C10G193030;Cla97C10G196230;Cla97C10G204950;Cla97C11G208770	K07375+K02148+K07374+K04392+K07374+K07375+K07375+K02151+K07375+K02150+K03661+K08517+K04392+K07375+K02155+K02155+K07374+K07374+K07375+K04392
Cysteine and methionine metabolism	ko00270	19	97	610	4382	Cla97C01G000540;Cla97C01G001520;Cla97C01G012000;Cla97C03G064170;Cla97C04G073140;Cla97C05G086940;Cla97C05G091060;Cla97C06G113030;Cla97C06G115890;Cla97C06G116020;Cla97C06G117640;Cla97C07G131010;Cla97C08G160480;Cla97C09G167000;Cla97C09G167770;Cla97C10G185400;Cla97C10G196410;Cla97C10G199540;Cla97C11G223810	K00797+K01761+K00797+K00558+K00827+K01611+K00797+K13034+K00547+K08967+K01251+K14455+K00826+K00789+K23977+K01761+K00549+K22846+K00815
Pyruvate metabolism	ko00620	18	95	610	4382	Cla97C01G013600;Cla97C02G042440;Cla97C02G049390;Cla97C03G054690;Cla97C03G066480;Cla97C04G076520;Cla97C05G086990;Cla97C05G088360;Cla97C05G107020;Cla97C06G118700;Cla97C07G134750;Cla97C08G152400;Cla97C08G152410;Cla97C09G163100;Cla97C09G172570;Cla97C10G192070;Cla97C10G193010;Cla97C10G205900	K00001+K00128+K00128+K01638+K00029+K00873+K01006+K00382+K00161+K01759+K02160+K00121+K00121+K14085+K18857+K01610+K00873+K00002
Ascorbate and aldarate metabolism	ko00053	17	59	610	4382	Cla97C01G002420;Cla97C01G019890;Cla97C01G021010;Cla97C02G042440;Cla97C02G049390;Cla97C03G064200;Cla97C03G066260;Cla97C05G082830;Cla97C06G117670;Cla97C06G125310;Cla97C06G125330;Cla97C08G153150;Cla97C09G163100;Cla97C09G173710;Cla97C10G190480;Cla97C10G205900;Cla97C11G220240	K08232+K00434+K10047+K00128+K00128+K00423+K00469+K08679+K08679+K00012+K00012+K00012+K14085+K14190+K08232+K00002+K00434
Cyanoamino acid metabolism	ko00460	16	58	610	4382	Cla97C01G016620;Cla97C03G056070;Cla97C03G063110;Cla97C04G077580;Cla97C06G113030;Cla97C06G123590;Cla97C08G153160;Cla97C08G154940;Cla97C09G163570;Cla97C10G196380;Cla97C11G218190;Cla97C11G218200;Cla97C11G218210;Cla97C11G218220;Cla97C11G218280;Cla97C11G224380	K01455+K05350+K12153+K05350+K13034+K05349+K01188+K00600+K08248+K05349+K08248+K08248+K08248+K08248+K08248+K05350
Galactose metabolism	ko00052	16	49	610	4382	Cla97C01G001730;Cla97C01G003100;Cla97C01G006680;Cla97C01G009200;Cla97C01G010580;Cla97C04G070460;Cla97C05G093450;Cla97C05G099630;Cla97C06G123720;Cla97C07G138310;Cla97C09G167400;Cla97C10G194470;Cla97C10G196740;Cla97C10G197800;Cla97C11G218690;Cla97C11G223970	K01784+K01784+K01835+K01187+K18819+K06617+K00963+K00844+K01785+K01784+K06611+K18819+K06617+K01785+K07407+K06617
Fatty acid degradation	ko00071	16	47	610	4382	Cla97C01G013600;Cla97C02G029500;Cla97C02G036270;Cla97C02G042440;Cla97C02G049390;Cla97C05G084200;Cla97C05G085370;Cla97C05G085380;Cla97C06G114510;Cla97C07G136380;Cla97C08G152400;Cla97C08G152410;Cla97C09G163100;Cla97C09G172570;Cla97C09G179150;Cla97C11G208800	K00001+K01897+K00232+K00128+K00128+K07513+K07517+K07517+K10527+K00232+K00121+K00121+K14085+K18857+K01897+K10527
Glutathione metabolism	ko00480	14	80	610	4382	Cla97C01G000540;Cla97C01G008870;Cla97C01G012000;Cla97C01G019890;Cla97C02G040260;Cla97C02G040270;Cla97C04G074250;Cla97C05G083070;Cla97C05G088420;Cla97C05G091060;Cla97C05G097140;Cla97C07G137320;Cla97C08G157490;Cla97C11G220240	K00797+K00031+K00797+K00434+K01255+K01255+K00799+K00799+K11188+K00797+K00432+K00799+K00799+K00434
Glycerophospholipid metabolism	ko00564	13	91	610	4382	Cla97C00G000480;Cla97C04G075280;Cla97C04G077470;Cla97C05G095410;Cla97C05G105240;Cla97C06G123790;Cla97C06G123800;Cla97C07G139470;Cla97C07G139660;Cla97C08G156710;Cla97C09G176070;Cla97C09G180920;Cla97C11G214710	K15728+K15728+K05929+K18696+K00993+K05929+K05929+K01115+K06130+K01115+K01613+K00006+K22389+K14156+K13509
Oxidative phosphorylation	ko00190	13	139	610	4382	Cla97C01G008480;Cla97C01G013340;Cla97C01G019080;Cla97C03G067740;Cla97C04G076910;Cla97C05G095370;Cla97C05G098290;Cla97C06G122930;Cla97C07G139190;Cla97C08G158010;Cla97C08G158020;Cla97C09G166470;Cla97C11G208240	K02148+K01535+K01507+K02151+K00419+K02150+K03661+K01535+K01535+K02155+K02155+K02137+K02140
Glycine, serine and threonine metabolism	ko00260	13	67	610	4382	Cla97C01G003780;Cla97C01G009760;Cla97C02G042740;Cla97C03G056090;Cla97C03G063130;Cla97C04G073140;Cla97C04G076360;Cla97C04G076390;Cla97C05G088360;Cla97C06G115610;Cla97C06G125180;Cla97C08G154940;Cla97C09G163100	K00276+K02437+K01620+K01696+K00830+K00827+K01754+K01754+K00382+K00276+K01079+K00600+K14085
Ubiquinone and other terpenoid-quinone biosynthesis	ko00130	13	54	610	4382	Cla97C01G018740;Cla97C01G022220;Cla97C02G034290;Cla97C02G045650;Cla97C03G054720;Cla97C04G069600;Cla97C05G088630;Cla97C08G161570;Cla97C10G190050;Cla97C11G217490;Cla97C11G219500;Cla97C11G222470;Cla97C11G223810	K03809+K03809+K01904+K03809+K01904+K17872+K19222+K23095+K03809+K00487+K01904+K00457+K00815
Valine, leucine and isoleucine degradation	ko00280	13	48	610	4382	Cla97C02G042440;Cla97C02G047030;Cla97C02G048790;Cla97C02G049390;Cla97C03G064870;Cla97C04G073140;Cla97C05G084200;Cla97C05G087770;Cla97C05G088360;Cla97C08G146990;Cla97C08G160480;Cla97C09G163100;Cla97C11G208510	K00128+K00253+K01640+K00128+K00167+K00827+K07513+K09699+K00382+K00166+K00826+K14085+K00020
Endocytosis	ko04144	13	136	610	4382	Cla97C01G016210;Cla97C02G033250;Cla97C02G041050;Cla97C02G046360;Cla97C04G071180;Cla97C06G112240;Cla97C06G119280;Cla97C07G139470;Cla97C08G156710;Cla97C09G172860;Cla97C09G181360;Cla97C10G185210;Cla97C11G217390	K07937+K07937+K10364+K07901+K00889+K12471+K03283+K01115+K01115+K03283+K03283+K19366+K03283
Purine metabolism	ko00230	12	85	610	4382	Cla97C01G004020;Cla97C01G006680;Cla97C04G068600;Cla97C04G076520;Cla97C05G085860;Cla97C06G116050;Cla97C06G127490;Cla97C08G150350;Cla97C08G156810;Cla97C08G160120;Cla97C10G187450;Cla97C10G193010	K00759+K01835+K00942+K00873+K13811+K13811+K00939+K00856+K00759+K00759+K00759+K00873
Peroxisome	ko04146	12	77	610	4382	Cla97C01G008870;Cla97C02G027590;Cla97C02G029500;Cla97C02G036270;Cla97C02G048790;Cla97C03G063130;Cla97C05G084200;Cla97C07G136380;Cla97C07G141310;Cla97C08G152180;Cla97C09G179150;Cla97C10G193470	K00031+K13348+K01897+K00232+K01640+K00830+K07513+K00232+K11517+K03781+K01897+K13348
Tyrosine metabolism	ko00350	12	51	610	4382	Cla97C01G003780;Cla97C01G013600;Cla97C03G057130;Cla97C04G073260;Cla97C06G115610;Cla97C07G131010;Cla97C07G136610;Cla97C08G152400;Cla97C08G152410;Cla97C09G172570;Cla97C11G222470;Cla97C11G223810	K00276+K00001+K00422+K07253+K00276+K14455+K00451+K00121+K00121+K18857+K00457+K00815
Carbon fixation in photosynthetic organisms	ko00710	12	67	610	4382	Cla97C02G037100;Cla97C02G042310;Cla97C03G066480;Cla97C04G073960;Cla97C05G086990;Cla97C05G104530;Cla97C07G131010;Cla97C07G134850;Cla97C10G192070;Cla97C10G203340;Cla97C11G210620;Cla97C11G213800	K01803+K01807+K00029+K03841+K01006+K01602+K14455+K01601+K01610+K00927+K01623+K00134
Glycerolipid metabolism	ko00561	11	65	610	4382	Cla97C00G000480;Cla97C02G042440;Cla97C02G047850;Cla97C02G049390;Cla97C04G075280;Cla97C04G077250;Cla97C06G122780;Cla97C08G155300;Cla97C09G163100;Cla97C10G205900;Cla97C11G218690	K15728+K00128+K00679+K00128+K15728+K01054+K24189+K01054+K14085+K00002+K07407+K13509
Glyoxylate and dicarboxylate metabolism	ko00630	11	66	610	4382	Cla97C01G002920;Cla97C01G009760;Cla97C01G016620;Cla97C03G054690;Cla97C03G063130;Cla97C05G088360;Cla97C05G104530;Cla97C07G134850;Cla97C07G141310;Cla97C08G152180;Cla97C08G154940	K22133+K02437+K01455+K01638+K00830+K00382+K01602+K01601+K11517+K03781+K00600
Ubiquitin mediated proteolysis	ko04120	11	101	610	4382	Cla97C01G000170;Cla97C01G003370;Cla97C01G009980;Cla97C01G013000;Cla97C02G045580;Cla97C02G047650;Cla97C04G076210;Cla97C07G132780;Cla97C08G149090;Cla97C09G168910;Cla97C09G175760	K02927+K03364+K10143+K10576+K10140+K10144+K10144+K03348+K03875+K10144+K10143
Tryptophan metabolism	ko00380	10	43	610	4382	Cla97C02G037270;Cla97C02G042440;Cla97C02G049390;Cla97C05G088360;Cla97C07G129830;Cla97C07G144540;Cla97C08G152180;Cla97C09G163100;Cla97C10G188660;Cla97C10G188670	K01426+K00128+K00128+K00382+K11816+K13066+K03781+K14085+K13066+K13066
Steroid biosynthesis	ko00100	10	25	610	4382	Cla97C01G024490;Cla97C05G094950;Cla97C05G096450;Cla97C07G138660;Cla97C07G141640;Cla97C08G152520;Cla97C08G160430;Cla97C09G166970;Cla97C10G195060;Cla97C10G195070	K09832+K01052+K08242+K05917+K00227+K23558+K00511+K09828+K00559+K00559
Terpenoid backbone biosynthesis	ko00900	10	50	610	4382	Cla97C01G011050;Cla97C02G036600;Cla97C02G045590;Cla97C03G061260;Cla97C06G118020;Cla97C06G122390;Cla97C07G137060;Cla97C08G151960;Cla97C09G182930;Cla97C10G185860	K00787+K00021+K11778+K01823+K15889+K01662+K05356+K00021+K00787+K00938
Arginine and proline metabolism	ko00330	10	53	610	4382	Cla97C01G000540;Cla97C01G012000;Cla97C02G037270;Cla97C02G042440;Cla97C02G049390;Cla97C05G086940;Cla97C05G091060;Cla97C07G131010;Cla97C09G163100;Cla97C11G208130	K00797+K00797+K01426+K00128+K00128+K01611+K00797+K14455+K14085+K12259
Fatty acid metabolism	ko01212	10	65	610	4382	Cla97C02G029500;Cla97C02G036270;Cla97C05G084200;Cla97C06G114510;Cla97C07G134750;Cla97C07G136380;Cla97C09G179150;Cla97C10G187050;Cla97C10G200350;Cla97C11G208800	K01897+K00232+K07513+K10527+K02160+K00232+K01897+K01074+K10256+K10527
Fructose and mannose metabolism	ko00051	9	50	610	4382	Cla97C02G037100;Cla97C04G073960;Cla97C05G093680;Cla97C05G099630;Cla97C05G100190;Cla97C06G110160;Cla97C07G135500;Cla97C11G210620;Cla97C11G213590	K01803+K03841+K01809+K00844+K19355+K00847+K01711+K01623+K00966
beta-Alanine metabolism	ko00410	9	40	610	4382	Cla97C01G003780;Cla97C02G036270;Cla97C02G042440;Cla97C02G049390;Cla97C06G115610;Cla97C07G136380;Cla97C09G163100;Cla97C09G177880;Cla97C11G208130	K00276+K00232+K00128+K00128+K00276+K00232+K14085+K01431+K12259
Phenylalanine, tyrosine and tryptophan biosynthesis	ko00400	9	47	610	4382	Cla97C01G011860;Cla97C01G011870;Cla97C01G018010;Cla97C02G027440;Cla97C03G056090;Cla97C07G131010;Cla97C08G154180;Cla97C11G211370;Cla97C11G223810	K05359+K05359+K01626+K00891+K01696+K14455+K01626+K01850+K00815
Linoleic acid metabolism	ko00591	8	28	610	4382	Cla97C02G041430;Cla97C02G041470;Cla97C02G049640;Cla97C02G049650;Cla97C02G049690;Cla97C09G163060;Cla97C09G170510;Cla97C11G219830	K15718+K15718+K00454+K00454+K00454+K00454+K00454+K00454
Arginine biosynthesis	ko00220	8	40	610	4382	Cla97C03G054790;Cla97C03G054820;Cla97C06G127510;Cla97C07G131010;Cla97C07G144200;Cla97C09G174910;Cla97C09G179000;Cla97C10G204170	K01940+K01940+K01940+K14455+K00261+K01438+K00145+K00620
Alanine, aspartate and glutamate metabolism	ko00250	8	57	610	4382	Cla97C03G054790;Cla97C03G054820;Cla97C03G063130;Cla97C04G073140;Cla97C06G127510;Cla97C07G131010;Cla97C07G144200;Cla97C08G152630	K01940+K01940+K00830+K00827+K01940+K14455+K00261+K01953
Propanoate metabolism	ko00640	7	34	610	4382	Cla97C02G036270;Cla97C03G064870;Cla97C05G087770;Cla97C05G088360;Cla97C07G134750;Cla97C07G136380;Cla97C08G146990	K00232+K00167+K09699+K00382+K02160+K00232+K00166
Phenylalanine metabolism	ko00360	7	46	610	4382	Cla97C01G003780;Cla97C02G037270;Cla97C04G073260;Cla97C06G115610;Cla97C07G131010;Cla97C11G222470;Cla97C11G223810	K00276+K01426+K07253+K00276+K14455+K00457+K00815
Carotenoid biosynthesis	ko00906	7	31	610	4382	Cla97C01G008760;Cla97C02G050560;Cla97C05G090480;Cla97C05G101520;Cla97C07G137260;Cla97C07G137500;Cla97C07G137780	K02291+K09842+K15746+K09843+K09840+K02291+K09840
Inositol phosphate metabolism	ko00562	7	63	610	4382	Cla97C01G018420;Cla97C01G021010;Cla97C02G037100;Cla97C03G051540;Cla97C03G066260;Cla97C04G071180;Cla97C09G178670	K01858+K10047+K01803+K05857+K00469+K00889+K00913
Pentose phosphate pathway	ko00030	7	48	610	4382	Cla97C01G005290;Cla97C01G006680;Cla97C02G042310;Cla97C02G042820;Cla97C04G073960;Cla97C08G158730;Cla97C11G210620	K00851+K01835+K01807+K00131+K03841+K01810+K01623
Cutin, suberine and wax biosynthesis	ko00073	7	30	610	4382	Cla97C05G083340;Cla97C05G103310;Cla97C06G110030;Cla97C06G117000;Cla97C06G127850;Cla97C07G129030;Cla97C11G214740	K15404+K21995+K15404+K17991+K15400+K20769+K15400
Circadian rhythm - plant	ko04712	7	34	610	4382	Cla97C01G009980;Cla97C02G039860;Cla97C05G098160;Cla97C06G111610;Cla97C06G111640;Cla97C08G150060;Cla97C09G175760	K10143+K16221+K16241+K12133+K12133+K12124+K10143
2-Oxocarboxylic acid metabolism	ko01210	7	44	610	4382	Cla97C01G008870;Cla97C03G063110;Cla97C07G131010;Cla97C08G160480;Cla97C09G174910;Cla97C09G179000;Cla97C10G204170	K00031+K12153+K14455+K00826+K01438+K00145+K00620
Porphyrin and chlorophyll metabolism	ko00860	6	52	610	4382	Cla97C01G003360;Cla97C01G012850;Cla97C02G043280;Cla97C07G128720;Cla97C09G166100;Cla97C10G193260	K22013+K13071+K00218+K08099+K02303+K04035
Tropane, piperidine and pyridine alkaloid biosynthesis	ko00960	6	25	610	4382	Cla97C01G003780;Cla97C06G115610;Cla97C07G131010;Cla97C10G204620;Cla97C10G204630;Cla97C11G223810	K00276+K00276+K14455+K08081+K08081+K00815
Selenocompound metabolism	ko00450	6	17	610	4382	Cla97C01G001520;Cla97C05G085860;Cla97C06G116050;Cla97C10G185400;Cla97C10G191230;Cla97C10G196410	K01761+K13811+K13811+K01761+K08247+K00549
Sphingolipid metabolism	ko00600	6	26	610	4382	Cla97C01G022490;Cla97C03G057250;Cla97C05G086640;Cla97C06G111390;Cla97C08G152380;Cla97C11G218690	K04718+K04712+K04708+K01634+K12349+K07407
Phosphatidylinositol signaling system	ko04070	6	54	610	4382	Cla97C01G021010;Cla97C02G050380;Cla97C03G051540;Cla97C04G071180;Cla97C09G178670;Cla97C09G179530	K10047+K02183+K05857+K00889+K00913+K02183
Ribosome	ko03010	6	284	610	4382	Cla97C00G000070;Cla97C01G000170;Cla97C02G038330;Cla97C03G057610;Cla97C09G181480;Cla97C11G219180	K02998+K02927+K02898+K02913+K02957+K02925
Flavonoid biosynthesis	ko00941	6	27	610	4382	Cla97C06G112270;Cla97C06G125240;Cla97C10G199260;Cla97C11G217490;Cla97C11G219650;Cla97C11G219690	K00475+K05280+K09754+K00487+K00588+K00588
DNA replication	ko03030	5	40	610	4382	Cla97C01G024450;Cla97C01G026140;Cla97C02G031670;Cla97C02G048110;Cla97C05G083310	K02541+K02542+K02212+K02324+K10742
Sesquiterpenoid and triterpenoid biosynthesis	ko00909	5	26	610	4382	Cla97C08G160430;Cla97C09G163860;Cla97C10G188210;Cla97C10G188220;Cla97C10G190240	K00511+K15820+K15803+K15803+K15803
Spliceosome	ko03040	5	151	610	4382	Cla97C02G039800;Cla97C06G119280;Cla97C09G172860;Cla97C09G181360;Cla97C11G217390	K12859+K03283+K03283+K03283+K03283
Lysine degradation	ko00310	5	23	610	4382	Cla97C02G042440;Cla97C02G049390;Cla97C03G064950;Cla97C05G088360;Cla97C09G163100	K00128+K00128+K14157+K00382+K14085
Isoquinoline alkaloid biosynthesis	ko00950	5	28	610	4382	Cla97C01G003780;Cla97C03G057130;Cla97C06G115610;Cla97C07G131010;Cla97C11G223810	K00276+K00422+K00276+K14455+K00815
Nitrogen metabolism	ko00910	5	36	610	4382	Cla97C01G016620;Cla97C05G092370;Cla97C07G144200;Cla97C08G154780;Cla97C10G201950	K01455+K00366+K00261+K01673+K01674
Stilbenoid, diarylheptanoid and gingerol biosynthesis	ko00945	5	21	610	4382	Cla97C10G195920;Cla97C10G199260;Cla97C11G217490;Cla97C11G219650;Cla97C11G219690	K16040+K09754+K00487+K00588+K00588
Fatty acid elongation	ko00062	5	25	610	4382	Cla97C02G031870;Cla97C02G046650;Cla97C05G104600;Cla97C06G119920;Cla97C10G187050	K15397+K15397+K15397+K15397+K01074
ABC transporters	ko02010	5	24	610	4382	Cla97C01G025090;Cla97C05G090750;Cla97C09G168520;Cla97C09G179710;Cla97C09G180000	K05666+K05666+K05666+K05658+K05658
Glycosphingolipid biosynthesis - globo and isoglobo series	ko00603	5	10	610	4382	Cla97C03G057170;Cla97C10G195630;Cla97C10G205230;Cla97C11G217190;Cla97C11G218690	K01988+K12373+K01988+K12373+K07407
Glycosaminoglycan degradation	ko00531	4	18	610	4382	Cla97C02G037610;Cla97C10G195630;Cla97C11G209950;Cla97C11G217190	K10532+K12373+K07964+K12373
Fatty acid biosynthesis	ko00061	4	40	610	4382	Cla97C02G029500;Cla97C07G134750;Cla97C09G171590;Cla97C09G179150	K01897+K02160+K10782+K01897
Citrate cycle (TCA cycle)	ko00020	4	46	610	4382	Cla97C01G008870;Cla97C05G088360;Cla97C05G107020;Cla97C10G192070	K00031+K00382+K00161+K01610
Sulfur metabolism	ko00920	4	34	610	4382	Cla97C05G085860;Cla97C06G113030;Cla97C06G116050;Cla97C11G223010	K13811+K13034+K13811+K17725
Pantothenate and CoA biosynthesis	ko00770	4	29	610	4382	Cla97C02G042440;Cla97C02G049390;Cla97C08G160480;Cla97C09G177880	K00128+K00128+K00826+K01431
Biosynthesis of unsaturated fatty acids	ko01040	4	21	610	4382	Cla97C02G036270;Cla97C05G084200;Cla97C07G136380;Cla97C10G200350	K00232+K07513+K00232+K10256
Diterpenoid biosynthesis	ko00904	4	21	610	4382	Cla97C01G005520;Cla97C05G101100;Cla97C06G109980;Cla97C07G128590	K05282+K04122+K04123+K04120
Base excision repair	ko03410	3	38	610	4382	Cla97C02G044760;Cla97C02G048110;Cla97C05G107130	K01246+K02324+K03512
Thiamine metabolism	ko00730	3	22	610	4382	Cla97C06G122390;Cla97C06G127490;Cla97C09G168550	K01662+K00939+K00949
Zeatin biosynthesis	ko00908	3	26	610	4382	Cla97C04G070780;Cla97C06G115310;Cla97C07G128470	K00279+K10760+K10760
Histidine metabolism	ko00340	3	19	610	4382	Cla97C02G042440;Cla97C02G049390;Cla97C09G163100	K00128+K00128+K14085
Photosynthesis	ko00195	3	65	610	4382	Cla97C01G011570;Cla97C05G091890;Cla97C11G214250	K02639+K02639+K02707
Other glycan degradation	ko00511	3	18	610	4382	Cla97C05G092720;Cla97C10G195630;Cla97C11G217190	K15923+K12373+K12373
Various types of N-glycan biosynthesis	ko00513	3	30	610	4382	Cla97C05G106270;Cla97C10G195630;Cla97C11G217190	K14413+K12373+K12373
Riboflavin metabolism	ko00740	3	15	610	4382	Cla97C07G131150;Cla97C07G135200;Cla97C08G147910	K20884+K22912+K14652
Valine, leucine and isoleucine biosynthesis	ko00290	3	16	610	4382	Cla97C04G076360;Cla97C04G076390;Cla97C08G160480	K01754+K01754+K00826
Nicotinate and nicotinamide metabolism	ko00760	3	19	610	4382	Cla97C01G007630;Cla97C10G188890;Cla97C10G204410	K18551+K06210+K18551
Ether lipid metabolism	ko00565	3	22	610	4382	Cla97C05G105240;Cla97C07G139470;Cla97C08G156710	K00993+K01115+K01115
mRNA surveillance pathway	ko03015	3	96	610	4382	Cla97C02G035780;Cla97C05G103240;Cla97C11G209130	K14411+K00565+K11584
Autophagy - other	ko04136	2	31	610	4382	Cla97C02G035300;Cla97C11G218570	K08341+K17908
RNA polymerase	ko03020	2	54	610	4382	Cla97C03G053130;Cla97C09G162830	K03018+K03005
Ribosome biogenesis in eukaryotes	ko03008	2	78	610	4382	Cla97C02G026500;Cla97C06G120000	K03264+K07936
Folate biosynthesis	ko00790	2	24	610	4382	Cla97C08G147910;Cla97C11G219450	K14652+K00079
Brassinosteroid biosynthesis	ko00905	2	13	610	4382	Cla97C09G162570;Cla97C11G209280	K12638+K15639
Monobactam biosynthesis	ko00261	2	8	610	4382	Cla97C05G085860;Cla97C06G116050	K13811+K13811
Limonene and pinene degradation	ko00903	2	7	610	4382	Cla97C02G042440;Cla97C02G049390	K00128+K00128
RNA transport	ko03013	2	144	610	4382	Cla97C05G083550;Cla97C06G120000	K03260+K07936
RNA degradation	ko03018	2	87	610	4382	Cla97C01G011260;Cla97C06G117140	K12581+K04077
Arachidonic acid metabolism	ko00590	2	17	610	4382	Cla97C05G097140;Cla97C11G219450	K00432+K00079
Nucleotide excision repair	ko03420	2	50	610	4382	Cla97C02G045580;Cla97C02G048110	K10140+K02324
Glucosinolate biosynthesis	ko00966	2	4	610	4382	Cla97C03G063110;Cla97C08G160480	K12153+K00826
Glycosphingolipid biosynthesis - lacto and neolacto series	ko00601	2	3	610	4382	Cla97C03G057170;Cla97C10G205230	K01988+K01988
Pyrimidine metabolism	ko00240	2	48	610	4382	Cla97C08G158740;Cla97C09G177880	K01520+K01431
Glycosphingolipid biosynthesis - ganglio series	ko00604	2	4	610	4382	Cla97C10G195630;Cla97C11G217190	K12373+K12373
Isoflavonoid biosynthesis	ko00943	2	4	610	4382	Cla97C02G034850;Cla97C02G034860	K13260+K13260
Synthesis and degradation of ketone bodies	ko00072	1	5	610	4382	Cla97C02G048790	K01640
Glycosylphosphatidylinositol (GPI)-anchor biosynthesis	ko00563	1	23	610	4382	Cla97C10G195680	K05287
Flavone and flavonol biosynthesis	ko00944	1	8	610	4382	Cla97C06G125240	K05280
Other types of O-glycan biosynthesis	ko00514	1	11	610	4382	Cla97C02G048930	K20782
Homologous recombination	ko03440	1	44	610	4382	Cla97C05G092420	K10875
Phosphonate and phosphinate metabolism	ko00440	1	5	610	4382	Cla97C05G105240	K00993
Non-homologous end-joining	ko03450	1	8	610	4382	Cla97C05G107130	K03512
Vitamin B6 metabolism	ko00750	1	16	610	4382	Cla97C09G162530	K13248
One carbon pool by folate	ko00670	1	18	610	4382	Cla97C08G154940	K00600
Protein export	ko03060	1	45	610	4382	Cla97C08G159120	K03100
SNARE interactions in vesicular transport	ko04130	1	38	610	4382	Cla97C07G141280	K08517
Basal transcription factors	ko03022	1	38	610	4382	Cla97C09G181980	K03139
Butanoate metabolism	ko00650	1	23	610	4382	Cla97C02G048790	K01640
