# Supplementary material
Source: MDPI journal article supplement (https://www.mdpi.com/2073-4395/13/3/618)
Supplement: s1 [file s1 › Table S6.pdf]

**Table S6.** Fold change of DEPs in bottle gourd rootstock- and self-grafted watermelon seedlings under salt stress.

| Spot ID <sup>1</sup> | Accession no. <sup>2</sup> | Fold change of<br>Ss 1 d to Ss 0 d | Fold change of<br>Ss 3 d to Ss 0 d | Fold change of<br>Ss 6 d to Ss 0 d | Fold change of<br>Rs 1 d to Rs 0 d | Fold change of<br>Rs 3 d to Rs 0 d | Fold change of<br>Rs 6 d to Rs 0 d |
|----------------------|----------------------------|------------------------------------|------------------------------------|------------------------------------|------------------------------------|------------------------------------|------------------------------------|
| A2                   | Cla97C09G162960            | 1.53                               | 1.05                               | -1.49                              | 1.38                               | 1.27                               | 1.13                               |
| B1                   | Cla97C02G036490            | 1.22                               | 1.59                               | -1.87                              | 1.68                               | 1.27                               | 1.06                               |
| B2                   | Cla97C04G076580            | 1.20                               | 1.68                               | 1.01                               | 1.85                               | 2.09                               | -3.21                              |
| B3                   | Cla97C10G194620            | -1.32                              | -2.01                              | -3.30                              | 1.41                               | 1.07                               | 1.20                               |
| B4                   | Cla97C09G167000            | -1.06                              | -1.40                              | -2.24                              | 1.84                               | 1.16                               | 1.63                               |
| B5                   | Cla97C05G088280            | 5.76                               | 3.44                               | 2.40                               | 1.26                               | 1.10                               | 1.58                               |
| B6                   | Cla97C05G107900            | -1.17                              | -1.71                              | -2.16                              | 2.31                               | 1.99                               | 1.86                               |
| B7                   | Cla97C03G064150            | -1.88                              | -1.42                              | -5.93                              | 1.01                               | 2.60                               | 1.32                               |
| B8                   | Cla97C02G042210            | 1.88                               | 2.34                               | -1.22                              | -1.39                              | 1.74                               | 2.42                               |
| B9                   | Cla97C04G071440            | -1.74                              | -1.80                              | -2.35                              | 2.12                               | 1.61                               | -1.56                              |
| B10                  | Cla97C02G037100            | 3.40                               | 2.90                               | 2.77                               | 1.15                               | 1.46                               | 1.25                               |
| B11                  | Cla97C07G134850            | 2.38                               | 1.82                               | -1.37                              | -1.08                              | 1.44                               | -1.82                              |
| B12                  | Cla97C10G203440            | 1.32                               | 2.25                               | 1.55                               | 1.40                               | 1.02                               | -1.14                              |
| C1                   | Cla97C11G208080            | -1.19                              | 1.62                               | 1.31                               | 1.05                               | 1.17                               | 1.16                               |
| C2                   | Cla97C09G177130            | -1.53                              | 1.12                               | 1.99                               | -1.09                              | 1.68                               | 1.04                               |
| C3                   | Cla97C09G163740            | 1.14                               | 1.03                               | 1.53                               | 1.46                               | 2.09                               | -1.92                              |
| C4                   | Cla97C10G192810            | -1.13                              | -1.25                              | 1.02                               | 3.18                               | 2.84                               | 1.19                               |
| C5                   | Cla97C09G178080            | -1.03                              | -1.07                              | -1.27                              | 2.78                               | 2.46                               | 1.81                               |
| C6                   | Cla97C05G086890            | -1.94                              | -1.52                              | 1.24                               | 2.72                               | 2.30                               | 2.25                               |
| C7                   | Cla97C05G107870            | -1.06                              | -1.09                              | -1.5                               | 1.12                               | -1.30                              | -1.35                              |
| C8                   | Cla97C10G205390            | 1.69                               | -3.58                              | 1.17                               | 4.10                               | 6.53                               | 2.93                               |
| C9                   | Cla97C09G180430            | -1.38                              | -1.31                              | -1.15                              | 1.86                               | 1.68                               | 1.47                               |
| C10                  | Cla97C03G065070            | 1.07                               | 1.06                               | 1.06                               | 1.69                               | 1.39                               | 1.18                               |
| C11                  | Cla97C03G060940            | 1.19                               | -1.35                              | -1.52                              | 1.46                               | 1.78                               | -1.11                              |

Table S6 (Continued)

| Spot ID | Accession no.   | Fold change of<br>Ss 1 d to Ss 0 d | Fold change of<br>Ss 3 d to Ss 0 d | Fold change of<br>Ss 6 d to Ss 0 d | Fold change of<br>Rs 1 d to Rs 0 d | Fold change of<br>Rs 1 d to Rs 0 d | Fold change of<br>Rs 6 d to Rs 0 d |
|---------|-----------------|------------------------------------|------------------------------------|------------------------------------|------------------------------------|------------------------------------|------------------------------------|
| C12     | Cla97C02G027850 | -1.34                              | -1.92                              | -6.82                              | 1.23                               | 1.54                               | 2.24                               |
| C13     | Cla97C03G051890 | -1.63                              | -1.61                              | -1.99                              | -1.06                              | 1.83                               | -2.68                              |
| C14     | Cla97C01G006310 | 1.65                               | 2.20                               | 2.15                               | -1.18                              | -2.10                              | -4.21                              |
| C15     | Cla97C05G104100 | -1.25                              | -1.87                              | -2.58                              | 4.43                               | 1.35                               | 1.29                               |

<sup>1</sup> Spot number in Figure 5.

<sup>2</sup> Accession number in the watermelon genome database.

“-“ indicates down-regulation.
