# Supplementary material
Source: MDPI journal article supplement (https://www.mdpi.com/2073-4395/13/3/618)
Supplement: s1 [file s1 › Table S7.pdf]

**Table S7.** Co-detected genes in DEGs and DEPs of each group.

| Spot ID <sup>1</sup> | Accession no. <sup>2</sup> | Protein name <sup>3</sup>                                                | Group <sup>4</sup>   | Ss 0 d vs.<br>Ss 1 d | Ss 0 d vs.<br>Ss 3 d | Rs 0 d vs.<br>Rs 1 d | Rs 0 d vs.<br>Rs 1 d |
|----------------------|----------------------------|--------------------------------------------------------------------------|----------------------|----------------------|----------------------|----------------------|----------------------|
| A2                   | Cla97C09G162960            | Auxin-binding protein ABP19a-like                                        | Hormone metabolism   | -                    | -                    | +                    | +                    |
| B2                   | Cla97C04G076580            | Enolase                                                                  | Carbon metabolism    | +                    | -                    | -                    | -                    |
| B4                   | Cla97C09G167000            | S-adenosylmethionine synthetase isoform 4                                | Amino acid synthesis | -                    | -                    | +                    | +                    |
| B5                   | Cla97C05G088280            | Galactokinase                                                            | Carbon metabolism    | -                    | -                    | -                    | +                    |
| B9                   | Cla97C04G071440            | Triosephosphate isomerase, cytosolic-like                                | Carbon metabolism    | +                    | -                    | -                    | -                    |
| B10                  | Cla97C02G037100            | Triosephosphate isomerase chloroplastic-like                             | Photosynthesis       | -                    | -                    | -                    | +                    |
| B11                  | Cla97C07G134850            | Ribulose biphosphate carboxylase large chain-like                        | Photosynthesis       | -                    | -                    | -                    | +                    |
| C2                   | Cla97C09G177130            | L-arabinofuranosidase 2                                                  | Carbon metabolism    | -                    | +                    | -                    | +                    |
| C4                   | Cla97C10G192810            | Heat shock 70 kDa protein                                                | Stress defense       | +                    | -                    | -                    | -                    |
| C6                   | Cla97C05G086890            | Glutamine synthetase leaf isozyme                                        | Amino acid synthesis | -                    | -                    | +                    | -                    |
| C7                   | Cla97C05G107870            | Glutamate-glyoxylate aminotransferase                                    | Amino acid synthesis | -                    | +                    | -                    | -                    |
| C10                  | Cla97C03G065070            | 20 kDa chaperonin, chloroplastic-like                                    | Stress defense       | +                    | -                    | +                    | -                    |
| C12                  | Cla97C02G027850            | Cytochrome b6-f complex iron-sulfur subunit, chloroplastic-like          | Photosynthesis       | -                    | -                    | +                    | -                    |
| C13                  | Cla97C03G051890            | Ribulose-1,5-bisphosphate carboxylase/oxygenase large subunit 2, partial | Photosynthesis       | -                    | -                    | -                    | +                    |

<sup>1</sup> Spot number in Figure 5.<sup>2</sup> Accession number in the watermelon genome database.<sup>3</sup> Description of the matched protein.<sup>4</sup> Functional classification.

“-” indicates absent, “+” indicates present.
