# Supplementary material
Source: MDPI journal article supplement (https://www.mdpi.com/2073-4395/13/3/618)

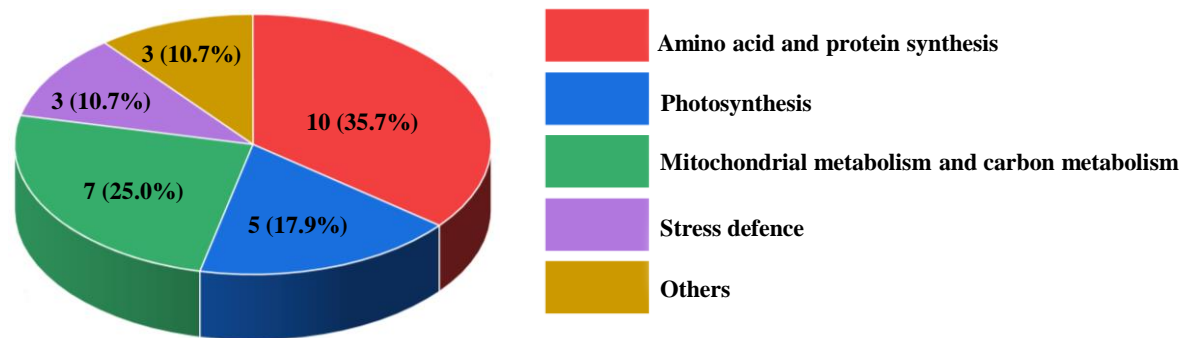

**Figure S1.** Functional classification and distribution of 28 differentially expressed proteins.

Supplement: s1 [file s1 › Figure S1.pdf]
